# Supplementary material for: APR-246 Enhances Colorectal Cancer Sensitivity to Radiotherapy
Source: Oxford University Press journal article supplement (doi:10.1158/1535-7163.mct-22-0275), 2023-05-22
Supplement: mct-22-0275_supplementary_data_suppsd1.xlsx [file mct-22-0275_supplementary_data_suppsd1.xlsx]

## Sheet: Wt_Combine_vs_RT
ensembl_gene_id	logFC	logCPM	PValue	FDR	external_gene_name	chromosome_name	start_position	end_position	strand	description
ENSG00000002549	0.585636	6.68133	0.237782	0.901101	LAP3	4	17577192	17607972	1	leucine aminopeptidase 3 [Source:HGNC Symbol;Acc:HGNC:18449]
ENSG00000002587	-0.361717	8.96705	0.382952	0.901101	HS3ST1	4	11393150	11429564	-1	heparan sulfate-glucosamine 3-sulfotransferase 1 [Source:HGNC Symbol;Acc:HGNC:5194]
ENSG00000003249	-0.383303	7.90286	0.378502	0.901101	DBNDD1	16	90004871	90019890	-1	dysbindin domain containing 1 [Source:HGNC Symbol;Acc:HGNC:28455]
ENSG00000004399	-0.71571	7.37715	0.0473431	0.901101	PLXND1	3	129555214	129606676	-1	plexin D1 [Source:HGNC Symbol;Acc:HGNC:9107]
ENSG00000004455	0.314836	8.01885	0.392734	0.901101	AK2	1	33007940	33080996	-1	adenylate kinase 2 [Source:HGNC Symbol;Acc:HGNC:362]
ENSG00000004487	0.279489	7.73372	0.435928	0.901101	KDM1A	1	23019443	23083689	1	lysine demethylase 1A [Source:HGNC Symbol;Acc:HGNC:29079]
ENSG00000004975	-0.294367	6.96777	0.375815	0.901101	DVL2	17	7225342	7234517	-1	dishevelled segment polarity protein 2 [Source:HGNC Symbol;Acc:HGNC:3086]
ENSG00000005486	-0.255309	7.24829	0.508376	0.901101	RHBDD2	7	75842602	75888926	1	rhomboid domain containing 2 [Source:HGNC Symbol;Acc:HGNC:23082]
ENSG00000005884	-0.380703	11.1656	0.481964	0.901101	ITGA3	17	50055968	50090481	1	integrin subunit alpha 3 [Source:HGNC Symbol;Acc:HGNC:6139]
ENSG00000006016	-0.91231	7.19027	0.127138	0.901101	CRLF1	19	18572220	18607741	-1	cytokine receptor like factor 1 [Source:HGNC Symbol;Acc:HGNC:2364]
ENSG00000006118	-0.768799	9.5287	0.0976009	0.901101	TMEM132A	11	60924460	60937159	1	transmembrane protein 132A [Source:HGNC Symbol;Acc:HGNC:31092]
ENSG00000006125	0.488915	8.41152	0.13191	0.901101	AP2B1	17	35578046	35726413	1	adaptor related protein complex 2 subunit beta 1 [Source:HGNC Symbol;Acc:HGNC:563]
ENSG00000006534	-0.494706	7.04939	0.165674	0.901101	ALDH3B1	11	68008578	68029282	1	aldehyde dehydrogenase 3 family member B1 [Source:HGNC Symbol;Acc:HGNC:410]
ENSG00000007047	-0.385403	7.15703	0.228284	0.901101	MARK4	19	45079288	45305284	1	microtubule affinity regulating kinase 4 [Source:HGNC Symbol;Acc:HGNC:13538]
ENSG00000008018	0.55097	7.54612	0.124554	0.901101	PSMB1	6	170535120	170553307	-1	proteasome 20S subunit beta 1 [Source:HGNC Symbol;Acc:HGNC:9537]
ENSG00000009307	0.81819	8.86262	0.163466	0.901101	CSDE1	1	114716913	114758676	-1	cold shock domain containing E1 [Source:HGNC Symbol;Acc:HGNC:29905]
ENSG00000009335	0.566569	7.21375	0.335984	0.901101	UBE3C	7	157138916	157269370	1	ubiquitin protein ligase E3C [Source:HGNC Symbol;Acc:HGNC:16803]
ENSG00000009954	0.615123	6.81752	0.370902	0.901101	BAZ1B	7	73440406	73522293	-1	bromodomain adjacent to zinc finger domain 1B [Source:HGNC Symbol;Acc:HGNC:961]
ENSG00000010256	-0.312866	8.81893	0.442878	0.901101	UQCRC1	3	48599002	48610976	-1	ubiquinol-cytochrome c reductase core protein 1 [Source:HGNC Symbol;Acc:HGNC:12585]
ENSG00000011295	0.592252	6.72679	0.398368	0.901101	TTC19	17	15999784	16045015	1	tetratricopeptide repeat domain 19 [Source:HGNC Symbol;Acc:HGNC:26006]
ENSG00000012061	-0.304488	7.27013	0.40809	0.901101	ERCC1	19	45407334	45478828	-1	ERCC excision repair 1, endonuclease non-catalytic subunit [Source:HGNC Symbol;Acc:HGNC:3433]
ENSG00000013306	-0.291322	9.53591	0.415628	0.901101	SLC25A39	17	44319625	44324870	-1	solute carrier family 25 member 39 [Source:HGNC Symbol;Acc:HGNC:24279]
ENSG00000013588	0.342596	9.25486	0.454236	0.901101	GPRC5A	12	12891559	12917937	1	G protein-coupled receptor class C group 5 member A [Source:HGNC Symbol;Acc:HGNC:9836]
ENSG00000014164	-0.493895	6.97739	0.17079	0.901101	ZC3H3	8	143437659	143541447	-1	zinc finger CCCH-type containing 3 [Source:HGNC Symbol;Acc:HGNC:28972]
ENSG00000014641	0.692739	6.59655	0.164691	0.901101	MDH1	2	63588609	63607197	1	malate dehydrogenase 1 [Source:HGNC Symbol;Acc:HGNC:6970]
ENSG00000017797	0.604914	7.03579	0.25386	0.901101	RALBP1	18	9475009	9538114	1	ralA binding protein 1 [Source:HGNC Symbol;Acc:HGNC:9841]
ENSG00000020633	-0.500638	6.81464	0.150456	0.901101	RUNX3	1	24899511	24965121	-1	RUNX family transcription factor 3 [Source:HGNC Symbol;Acc:HGNC:10473]
ENSG00000021300	-0.260679	7.03127	0.5049	0.901101	PLEKHB1	11	73646178	73662819	1	pleckstrin homology domain containing B1 [Source:HGNC Symbol;Acc:HGNC:19079]
ENSG00000021355	0.571227	6.71297	0.220922	0.901101	SERPINB1	6	2832332	2841959	-1	serpin family B member 1 [Source:HGNC Symbol;Acc:HGNC:3311]
ENSG00000021762	-0.343282	7.15728	0.274152	0.901101	OSBPL5	11	3087107	3166739	-1	oxysterol binding protein like 5 [Source:HGNC Symbol;Acc:HGNC:16392]
ENSG00000023191	-0.443799	8.59019	0.301451	0.901101	RNH1	11	494512	507300	-1	ribonuclease/angiogenin inhibitor 1 [Source:HGNC Symbol;Acc:HGNC:10074]
ENSG00000023734	0.63708	7.43751	0.213698	0.901101	STRAP	12	15882387	15903478	1	serine/threonine kinase receptor associated protein [Source:HGNC Symbol;Acc:HGNC:30796]
ENSG00000024422	-0.5332	8.52244	0.157866	0.901101	EHD2	19	47713422	47743134	1	EH domain containing 2 [Source:HGNC Symbol;Acc:HGNC:3243]
ENSG00000025770	-0.564526	6.79664	0.247239	0.901101	NCAPH2	22	50508224	50524780	1	non-SMC condensin II complex subunit H2 [Source:HGNC Symbol;Acc:HGNC:25071]
ENSG00000026508	0.337443	9.05781	0.472358	0.901101	CD44	11	35138882	35232402	1	CD44 molecule (Indian blood group) [Source:HGNC Symbol;Acc:HGNC:1681]
ENSG00000026559	-0.422351	7.38883	0.453146	0.901101	KCNG1	20	51003656	51023107	-1	potassium voltage-gated channel modifier subfamily G member 1 [Source:HGNC Symbol;Acc:HGNC:6248]
ENSG00000030582	-0.350401	9.38715	0.358832	0.901101	GRN	17	44345246	44353106	1	granulin precursor [Source:HGNC Symbol;Acc:HGNC:4601]
ENSG00000032444	-0.383483	8.44723	0.373969	0.901101	PNPLA6	19	7534004	7561764	1	patatin like phospholipase domain containing 6 [Source:HGNC Symbol;Acc:HGNC:16268]
ENSG00000035403	0.379472	7.41385	0.462181	0.901101	VCL	10	73995193	74121363	1	vinculin [Source:HGNC Symbol;Acc:HGNC:12665]
ENSG00000037474	0.756891	7.07173	0.182719	0.901101	NSUN2	5	6599239	6633291	-1	NOP2/Sun RNA methyltransferase 2 [Source:HGNC Symbol;Acc:HGNC:25994]
ENSG00000038358	-0.207601	6.98152	0.516671	0.901101	EDC4	16	67873052	67884499	1	enhancer of mRNA decapping 4 [Source:HGNC Symbol;Acc:HGNC:17157]
ENSG00000039068	0.554955	6.85447	0.413729	0.901101	CDH1	16	68737292	68835541	1	cadherin 1 [Source:HGNC Symbol;Acc:HGNC:1748]
ENSG00000039523	-0.29255	7.0206	0.379142	0.901101	RIPOR1	16	67518418	67546788	1	RHO family interacting cell polarization regulator 1 [Source:HGNC Symbol;Acc:HGNC:25836]
ENSG00000039650	-0.474873	6.75384	0.257818	0.901101	PNKP	19	49859882	49878351	-1	polynucleotide kinase 3'-phosphatase [Source:HGNC Symbol;Acc:HGNC:9154]
ENSG00000041357	0.947722	7.11141	0.10197	0.901101	PSMA4	15	78540405	78552417	1	proteasome 20S subunit alpha 4 [Source:HGNC Symbol;Acc:HGNC:9533]
ENSG00000042445	0.391844	6.96913	0.265507	0.901101	RETSAT	2	85341955	85354531	-1	retinol saturase [Source:HGNC Symbol;Acc:HGNC:25991]
ENSG00000042493	-0.413402	8.26949	0.267163	0.901101	CAPG	2	85394753	85418432	-1	capping actin protein, gelsolin like [Source:HGNC Symbol;Acc:HGNC:1474]
ENSG00000044115	0.29543	8.99959	0.437454	0.901101	CTNNA1	5	138610967	138935034	1	catenin alpha 1 [Source:HGNC Symbol;Acc:HGNC:2509]
ENSG00000046604	0.723087	7.31367	0.347864	0.901101	DSG2	18	31498177	31549008	1	desmoglein 2 [Source:HGNC Symbol;Acc:HGNC:3049]
ENSG00000047315	0.987644	6.926	0.125256	0.901101	POLR2B	4	56977722	57031158	1	RNA polymerase II subunit B [Source:HGNC Symbol;Acc:HGNC:9188]
ENSG00000048828	0.425557	7.71789	0.414849	0.901101	FAM120A	9	93451685	93566112	1	family with sequence similarity 120A [Source:HGNC Symbol;Acc:HGNC:13247]
ENSG00000049130	0.723283	8.47235	0.372205	0.901101	KITLG	12	88492793	88580851	-1	KIT ligand [Source:HGNC Symbol;Acc:HGNC:6343]
ENSG00000050820	-0.479693	8.0343	0.214439	0.901101	BCAR1	16	75228181	75268053	-1	BCAR1 scaffold protein, Cas family member [Source:HGNC Symbol;Acc:HGNC:971]
ENSG00000051523	-0.492962	9.62906	0.347417	0.901101	CYBA	16	88643289	88651054	-1	cytochrome b-245 alpha chain [Source:HGNC Symbol;Acc:HGNC:2577]
ENSG00000052344	-0.750286	6.91071	0.038262	0.901101	PRSS8	16	31131433	31135727	-1	serine protease 8 [Source:HGNC Symbol;Acc:HGNC:9491]
ENSG00000053371	-0.439878	6.78153	0.395247	0.901101	AKR7A2	1	19303965	19312146	-1	aldo-keto reductase family 7 member A2 [Source:HGNC Symbol;Acc:HGNC:389]
ENSG00000054118	0.532997	7.58028	0.28212	0.901101	THRAP3	1	36224432	36305357	1	thyroid hormone receptor associated protein 3 [Source:HGNC Symbol;Acc:HGNC:22964]
ENSG00000054598	-0.39165	7.89275	0.240652	0.901101	FOXC1	6	1609915	1613897	1	forkhead box C1 [Source:HGNC Symbol;Acc:HGNC:3800]
ENSG00000055163	0.270562	7.41981	0.400773	0.901101	CYFIP2	5	157266079	157395595	1	cytoplasmic FMR1 interacting protein 2 [Source:HGNC Symbol;Acc:HGNC:13760]
ENSG00000056097	0.804483	6.47821	0.272666	0.901101	ZFR	5	32354350	32444740	-1	zinc finger RNA binding protein [Source:HGNC Symbol;Acc:HGNC:17277]
ENSG00000057019	0.600531	9.0338	0.360945	0.901101	DCBLD2	3	98795941	98901695	-1	discoidin, CUB and LCCL domain containing 2 [Source:HGNC Symbol;Acc:HGNC:24627]
ENSG00000057608	0.731333	7.08815	0.170205	0.901101	GDI2	10	5765223	5842132	-1	GDP dissociation inhibitor 2 [Source:HGNC Symbol;Acc:HGNC:4227]
ENSG00000058262	0.340327	8.91982	0.322416	0.901101	SEC61A1	3	128051641	128071683	1	SEC61 translocon subunit alpha 1 [Source:HGNC Symbol;Acc:HGNC:18276]
ENSG00000059122	-0.564756	8.69245	0.30539	0.901101	FLYWCH1	16	2911931	2951208	1	FLYWCH-type zinc finger 1 [Source:HGNC Symbol;Acc:HGNC:25404]
ENSG00000059573	0.299438	7.55103	0.352481	0.901101	ALDH18A1	10	95605941	95656711	-1	aldehyde dehydrogenase 18 family member A1 [Source:HGNC Symbol;Acc:HGNC:9722]
ENSG00000060491	-0.366155	8.35384	0.304907	0.901101	OGFR	20	62804835	62814000	1	opioid growth factor receptor [Source:HGNC Symbol;Acc:HGNC:15768]
ENSG00000060656	-0.468298	8.09437	0.165933	0.901101	PTPRU	1	29236516	29326813	1	protein tyrosine phosphatase receptor type U [Source:HGNC Symbol;Acc:HGNC:9683]
ENSG00000061676	0.845332	6.69277	0.285075	0.901101	NCKAP1	2	182909115	183038858	-1	NCK associated protein 1 [Source:HGNC Symbol;Acc:HGNC:7666]
ENSG00000061938	-0.350913	7.26526	0.330156	0.901101	TNK2	3	195863364	195911945	-1	tyrosine kinase non receptor 2 [Source:HGNC Symbol;Acc:HGNC:19297]
ENSG00000062716	0.923946	6.98118	0.148003	0.901101	VMP1	17	59707192	59842255	1	vacuole membrane protein 1 [Source:HGNC Symbol;Acc:HGNC:29559]
ENSG00000062822	-0.643472	7.43109	0.21405	0.901101	POLD1	19	50384204	50418018	1	DNA polymerase delta 1, catalytic subunit [Source:HGNC Symbol;Acc:HGNC:9175]
ENSG00000063046	0.359051	9.74011	0.429667	0.901101	EIF4B	12	53006282	53042215	1	eukaryotic translation initiation factor 4B [Source:HGNC Symbol;Acc:HGNC:3285]
ENSG00000063177	-0.272065	11.0606	0.494039	0.901101	RPL18	19	48615328	48619184	-1	ribosomal protein L18 [Source:HGNC Symbol;Acc:HGNC:10310]
ENSG00000063241	-0.453579	6.88122	0.350357	0.901101	ISOC2	19	55452985	55462343	-1	isochorismatase domain containing 2 [Source:HGNC Symbol;Acc:HGNC:26278]
ENSG00000063245	-0.930632	9.39501	0.179222	0.901101	EPN1	19	55675226	55709858	1	epsin 1 [Source:HGNC Symbol;Acc:HGNC:21604]
ENSG00000063660	-0.526003	9.15223	0.251535	0.901101	GPC1	2	240435663	240468076	1	glypican 1 [Source:HGNC Symbol;Acc:HGNC:4449]
ENSG00000064393	0.539554	6.46659	0.476315	0.901101	HIPK2	7	139561570	139777998	-1	homeodomain interacting protein kinase 2 [Source:HGNC Symbol;Acc:HGNC:14402]
ENSG00000064545	-0.45799	7.67573	0.207513	0.901101	TMEM161A	19	19119169	19138513	-1	transmembrane protein 161A [Source:HGNC Symbol;Acc:HGNC:26020]
ENSG00000064932	-0.553011	8.34587	0.126025	0.901101	SBNO2	19	1107637	1174268	-1	strawberry notch homolog 2 [Source:HGNC Symbol;Acc:HGNC:29158]
ENSG00000065054	-0.496297	7.51946	0.291521	0.901101	SLC9A3R2	16	2025356	2039026	1	SLC9A3 regulator 2 [Source:HGNC Symbol;Acc:HGNC:11076]
ENSG00000065150	0.721441	7.65822	0.10243	0.901101	IPO5	13	97953658	98024296	1	importin 5 [Source:HGNC Symbol;Acc:HGNC:6402]
ENSG00000065154	1.02688	6.73755	0.0786383	0.901101	OAT	10	124397303	124418976	-1	ornithine aminotransferase [Source:HGNC Symbol;Acc:HGNC:8091]
ENSG00000065268	-0.560303	8.09832	0.321432	0.901101	WDR18	19	984332	998438	1	WD repeat domain 18 [Source:HGNC Symbol;Acc:HGNC:17956]
ENSG00000065427	0.436062	7.96346	0.153267	0.901101	KARS1	16	75627474	75648643	-1	lysyl-tRNA synthetase 1 [Source:HGNC Symbol;Acc:HGNC:6215]
ENSG00000065526	0.457757	7.02532	0.502185	0.901101	SPEN	1	15836095	15940456	1	spen family transcriptional repressor [Source:HGNC Symbol;Acc:HGNC:17575]
ENSG00000065717	-0.871448	7.45302	0.043765	0.901101	TLE2	19	2997639	3047635	-1	TLE family member 2, transcriptional corepressor [Source:HGNC Symbol;Acc:HGNC:11838]
ENSG00000065911	0.737778	8.08532	0.308823	0.901101	MTHFD2	2	74186172	74217565	1	methylenetetrahydrofolate dehydrogenase (NADP+ dependent) 2, methenyltetrahydrofolate cyclohydrolase [Source:HGNC Symbol;Acc:HGNC:7434]
ENSG00000065978	0.317624	10.63	0.308846	0.901101	YBX1	1	42682418	42703805	1	Y-box binding protein 1 [Source:HGNC Symbol;Acc:HGNC:8014]
ENSG00000066044	0.237724	7.29108	0.452746	0.901101	ELAVL1	19	7958573	8005659	-1	ELAV like RNA binding protein 1 [Source:HGNC Symbol;Acc:HGNC:3312]
ENSG00000067167	0.854312	7.18118	0.167444	0.901101	TRAM1	8	70573218	70608416	-1	translocation associated membrane protein 1 [Source:HGNC Symbol;Acc:HGNC:20568]
ENSG00000067182	-0.26095	7.33401	0.504129	0.901101	TNFRSF1A	12	6328757	6342114	-1	TNF receptor superfamily member 1A [Source:HGNC Symbol;Acc:HGNC:11916]
ENSG00000067704	0.752133	7.14225	0.213648	0.901101	IARS2	1	220094132	220148041	1	isoleucyl-tRNA synthetase 2, mitochondrial [Source:HGNC Symbol;Acc:HGNC:29685]
ENSG00000068078	-0.396568	6.79611	0.297701	0.901101	FGFR3	4	1793293	1808872	1	fibroblast growth factor receptor 3 [Source:HGNC Symbol;Acc:HGNC:3690]
ENSG00000068120	-0.325814	7.71568	0.291398	0.901101	COASY	17	42561467	42566277	1	Coenzyme A synthase [Source:HGNC Symbol;Acc:HGNC:29932]
ENSG00000068137	-0.7813	8.38986	0.0644616	0.901101	PLEKHH3	17	42667914	42676994	-1	pleckstrin homology, MyTH4 and FERM domain containing H3 [Source:HGNC Symbol;Acc:HGNC:26105]
ENSG00000068654	0.292793	7.31642	0.434333	0.901101	POLR1A	2	86020216	86106155	-1	RNA polymerase I subunit A [Source:HGNC Symbol;Acc:HGNC:17264]
ENSG00000068697	0.600748	7.19145	0.165261	0.901101	LAPTM4A	2	20032650	20051628	-1	lysosomal protein transmembrane 4 alpha [Source:HGNC Symbol;Acc:HGNC:6924]
ENSG00000069011	-0.666754	7.64028	0.202095	0.901101	PITX1	5	135027734	135034813	-1	paired like homeodomain 1 [Source:HGNC Symbol;Acc:HGNC:9004]
ENSG00000069275	0.647797	7.73961	0.275051	0.901101	NUCKS1	1	205712822	205750182	-1	nuclear casein kinase and cyclin dependent kinase substrate 1 [Source:HGNC Symbol;Acc:HGNC:29923]
ENSG00000069329	0.855968	6.82671	0.145223	0.901101	VPS35	16	46656132	46689518	-1	VPS35 retromer complex component [Source:HGNC Symbol;Acc:HGNC:13487]
ENSG00000069849	0.360859	6.88642	0.410529	0.901101	ATP1B3	3	141876124	141926549	1	ATPase Na+/K+ transporting subunit beta 3 [Source:HGNC Symbol;Acc:HGNC:806]
ENSG00000070404	-0.25159	7.11709	0.485321	0.901101	FSTL3	19	676392	683392	1	follistatin like 3 [Source:HGNC Symbol;Acc:HGNC:3973]
ENSG00000070423	-0.285906	8.12397	0.461217	0.901101	RNF126	19	647526	663233	-1	ring finger protein 126 [Source:HGNC Symbol;Acc:HGNC:21151]
ENSG00000070756	0.446026	11.6312	0.201861	0.901101	PABPC1	8	100685816	100722809	-1	poly(A) binding protein cytoplasmic 1 [Source:HGNC Symbol;Acc:HGNC:8554]
ENSG00000070831	0.634485	7.78708	0.148374	0.901101	CDC42	1	22025511	22101360	1	cell division cycle 42 [Source:HGNC Symbol;Acc:HGNC:1736]
ENSG00000071054	0.599228	7.23352	0.323192	0.901101	MAP4K4	2	101696850	101894689	1	mitogen-activated protein kinase kinase kinase kinase 4 [Source:HGNC Symbol;Acc:HGNC:6866]
ENSG00000071564	-0.324588	8.95653	0.324271	0.901101	TCF3	19	1609290	1652615	-1	transcription factor 3 [Source:HGNC Symbol;Acc:HGNC:11633]
ENSG00000071655	-0.235723	7.28756	0.506976	0.901101	MBD3	19	1573596	1592865	-1	methyl-CpG binding domain protein 3 [Source:HGNC Symbol;Acc:HGNC:6918]
ENSG00000071894	-0.428848	9.18118	0.245017	0.901101	CPSF1	8	144393229	144409335	-1	cleavage and polyadenylation specific factor 1 [Source:HGNC Symbol;Acc:HGNC:2324]
ENSG00000071994	0.350925	6.98966	0.291928	0.901101	PDCD2	6	170575295	170584692	-1	programmed cell death 2 [Source:HGNC Symbol;Acc:HGNC:8762]
ENSG00000072071	-0.302088	8.05975	0.302837	0.901101	ADGRL1	19	14147743	14206187	-1	adhesion G protein-coupled receptor L1 [Source:HGNC Symbol;Acc:HGNC:20973]
ENSG00000072274	0.985168	7.84764	0.154759	0.901101	TFRC	3	196027183	196082096	-1	transferrin receptor [Source:HGNC Symbol;Acc:HGNC:11763]
ENSG00000072310	-0.610975	10.0224	0.123243	0.901101	SREBF1	17	17810399	17837011	-1	sterol regulatory element binding transcription factor 1 [Source:HGNC Symbol;Acc:HGNC:11289]
ENSG00000073111	-0.351709	7.49126	0.507869	0.901101	MCM2	3	127598410	127622436	1	minichromosome maintenance complex component 2 [Source:HGNC Symbol;Acc:HGNC:6944]
ENSG00000073169	-0.404527	6.5722	0.358713	0.901101	SELENOO	22	50200979	50217616	1	selenoprotein O [Source:HGNC Symbol;Acc:HGNC:30395]
ENSG00000073350	-0.426709	9.11395	0.182022	0.901101	LLGL2	17	75525080	75575209	1	LLGL scribble cell polarity complex component 2 [Source:HGNC Symbol;Acc:HGNC:6629]
ENSG00000073792	0.382012	7.4	0.47362	0.901101	IGF2BP2	3	185643130	185825042	-1	insulin like growth factor 2 mRNA binding protein 2 [Source:HGNC Symbol;Acc:HGNC:28867]
ENSG00000074071	-0.310101	6.97736	0.503056	0.901101	MRPS34	16	1771890	1773150	-1	mitochondrial ribosomal protein S34 [Source:HGNC Symbol;Acc:HGNC:16618]
ENSG00000074181	-0.568882	8.40767	0.0602836	0.901101	NOTCH3	19	15159038	15200995	-1	notch receptor 3 [Source:HGNC Symbol;Acc:HGNC:7883]
ENSG00000074370	-0.406978	6.83878	0.261658	0.901101	ATP2A3	17	3923870	3964464	-1	ATPase sarcoplasmic/endoplasmic reticulum Ca2+ transporting 3 [Source:HGNC Symbol;Acc:HGNC:813]
ENSG00000075618	-0.445751	10.2609	0.395244	0.901101	FSCN1	7	5592816	5606655	1	fascin actin-bundling protein 1 [Source:HGNC Symbol;Acc:HGNC:11148]
ENSG00000075785	0.503567	7.93895	0.230837	0.901101	RAB7A	3	128693669	128825942	1	RAB7A, member RAS oncogene family [Source:HGNC Symbol;Acc:HGNC:9788]
ENSG00000076201	-0.574781	7.92591	0.116934	0.901101	PTPN23	3	47381011	47413435	1	protein tyrosine phosphatase non-receptor type 23 [Source:HGNC Symbol;Acc:HGNC:14406]
ENSG00000076826	-0.465957	6.92873	0.229667	0.901101	CAMSAP3	19	7595863	7618304	1	calmodulin regulated spectrin associated protein family member 3 [Source:HGNC Symbol;Acc:HGNC:29307]
ENSG00000076924	-0.382531	8.44993	0.421524	0.901101	XAB2	19	7619525	7629545	-1	XPA binding protein 2 [Source:HGNC Symbol;Acc:HGNC:14089]
ENSG00000076928	-0.385877	8.23427	0.304843	0.901101	ARHGEF1	19	41883173	41930150	1	Rho guanine nucleotide exchange factor 1 [Source:HGNC Symbol;Acc:HGNC:681]
ENSG00000076944	-0.361173	7.10324	0.3757	0.901101	STXBP2	19	7636881	7647873	1	syntaxin binding protein 2 [Source:HGNC Symbol;Acc:HGNC:11445]
ENSG00000077150	-0.439661	8.68695	0.206967	0.901101	NFKB2	10	102394110	102402524	1	nuclear factor kappa B subunit 2 [Source:HGNC Symbol;Acc:HGNC:7795]
ENSG00000077312	-0.468995	7.27065	0.36225	0.901101	SNRPA	19	40750637	40765389	1	small nuclear ribonucleoprotein polypeptide A [Source:HGNC Symbol;Acc:HGNC:11151]
ENSG00000078140	0.817488	6.93612	0.105991	0.901101	UBE2K	4	39698109	39782792	1	ubiquitin conjugating enzyme E2 K [Source:HGNC Symbol;Acc:HGNC:4914]
ENSG00000078369	0.28009	9.26792	0.455146	0.901101	GNB1	1	1785285	1891117	-1	G protein subunit beta 1 [Source:HGNC Symbol;Acc:HGNC:4396]
ENSG00000078618	0.740753	7.14097	0.307482	0.901101	NRDC	1	51789191	51878937	-1	nardilysin convertase [Source:HGNC Symbol;Acc:HGNC:7995]
ENSG00000079246	0.697578	8.44797	0.116222	0.901101	XRCC5	2	216107464	216206303	1	X-ray repair cross complementing 5 [Source:HGNC Symbol;Acc:HGNC:12833]
ENSG00000079313	-0.439043	7.09742	0.219438	0.901101	REXO1	19	1815248	1848483	-1	RNA exonuclease 1 homolog [Source:HGNC Symbol;Acc:HGNC:24616]
ENSG00000079432	-0.469434	7.98968	0.119935	0.901101	CIC	19	42268537	42295797	1	capicua transcriptional repressor [Source:HGNC Symbol;Acc:HGNC:14214]
ENSG00000079785	0.999823	6.96513	0.116734	0.901101	DDX1	2	15591178	15634346	1	DEAD-box helicase 1 [Source:HGNC Symbol;Acc:HGNC:2734]
ENSG00000079805	-0.25356	8.86082	0.427123	0.901101	DNM2	19	10718079	10833488	1	dynamin 2 [Source:HGNC Symbol;Acc:HGNC:2974]
ENSG00000080824	1.03457	10.3613	0.199851	0.901101	HSP90AA1	14	102080742	102139699	-1	heat shock protein 90 alpha family class A member 1 [Source:HGNC Symbol;Acc:HGNC:5253]
ENSG00000081154	0.766909	7.01896	0.207403	0.901101	PCNP	3	101574180	101594465	1	PEST proteolytic signal containing nuclear protein [Source:HGNC Symbol;Acc:HGNC:30023]
ENSG00000082153	0.906823	7.48132	0.169841	0.901101	BZW1	2	200810594	200827338	1	basic leucine zipper and W2 domains 1 [Source:HGNC Symbol;Acc:HGNC:18380]
ENSG00000082898	0.911409	6.72167	0.255168	0.901101	XPO1	2	61476032	61538741	-1	exportin 1 [Source:HGNC Symbol;Acc:HGNC:12825]
ENSG00000083444	-0.237313	8.90629	0.475996	0.901101	PLOD1	1	11934205	11975538	1	procollagen-lysine,2-oxoglutarate 5-dioxygenase 1 [Source:HGNC Symbol;Acc:HGNC:9081]
ENSG00000083845	-0.301187	11.061	0.471509	0.901101	RPS5	19	58386400	58394806	1	ribosomal protein S5 [Source:HGNC Symbol;Acc:HGNC:10426]
ENSG00000083857	0.605781	9.95629	0.40353	0.901101	FAT1	4	186587794	186726722	-1	FAT atypical cadherin 1 [Source:HGNC Symbol;Acc:HGNC:3595]
ENSG00000084090	0.64942	7.29734	0.168406	0.901101	STARD7	2	96184859	96208825	-1	StAR related lipid transfer domain containing 7 [Source:HGNC Symbol;Acc:HGNC:18063]
ENSG00000084234	0.528552	8.95447	0.305369	0.901101	APLP2	11	130068147	130144811	1	amyloid beta precursor like protein 2 [Source:HGNC Symbol;Acc:HGNC:598]
ENSG00000084733	0.486578	7.6967	0.418094	0.901101	RAB10	2	26034084	26137454	1	RAB10, member RAS oncogene family [Source:HGNC Symbol;Acc:HGNC:9759]
ENSG00000084754	0.233157	7.7338	0.446925	0.901101	HADHA	2	26190635	26244672	-1	hydroxyacyl-CoA dehydrogenase trifunctional multienzyme complex subunit alpha [Source:HGNC Symbol;Acc:HGNC:4801]
ENSG00000084774	-0.281869	8.67635	0.386195	0.901101	CAD	2	27217369	27243943	1	carbamoyl-phosphate synthetase 2, aspartate transcarbamylase, and dihydroorotase [Source:HGNC Symbol;Acc:HGNC:1424]
ENSG00000085719	0.748047	6.8496	0.20582	0.901101	CPNE3	8	86514435	86561498	1	copine 3 [Source:HGNC Symbol;Acc:HGNC:2316]
ENSG00000085733	0.527921	8.24054	0.419651	0.901101	CTTN	11	70398404	70436584	1	cortactin [Source:HGNC Symbol;Acc:HGNC:3338]
ENSG00000085872	-0.458525	7.9162	0.239478	0.901101	CHERP	19	16517894	16542437	-1	calcium homeostasis endoplasmic reticulum protein [Source:HGNC Symbol;Acc:HGNC:16930]
ENSG00000085998	-0.268539	7.59834	0.4165	0.901101	POMGNT1	1	46188682	46220305	-1	protein O-linked mannose N-acetylglucosaminyltransferase 1 (beta 1,2-) [Source:HGNC Symbol;Acc:HGNC:19139]
ENSG00000086015	-0.287206	7.60003	0.370419	0.901101	MAST2	1	45786987	46036122	1	microtubule associated serine/threonine kinase 2 [Source:HGNC Symbol;Acc:HGNC:19035]
ENSG00000086061	1.0467	7.1761	0.0717501	0.901101	DNAJA1	9	33025273	33039907	1	DnaJ heat shock protein family (Hsp40) member A1 [Source:HGNC Symbol;Acc:HGNC:5229]
ENSG00000086232	0.419491	7.63122	0.290548	0.901101	EIF2AK1	7	6022247	6059175	-1	eukaryotic translation initiation factor 2 alpha kinase 1 [Source:HGNC Symbol;Acc:HGNC:24921]
ENSG00000086598	0.882165	7.70351	0.0990363	0.901101	TMED2	12	123584533	123598582	1	transmembrane p24 trafficking protein 2 [Source:HGNC Symbol;Acc:HGNC:16996]
ENSG00000087087	0.232726	7.72359	0.49751	0.901101	SRRT	7	100875103	100888664	1	serrate, RNA effector molecule [Source:HGNC Symbol;Acc:HGNC:24101]
ENSG00000087191	0.336642	7.06732	0.312196	0.901101	PSMC5	17	63827152	63832026	1	proteasome 26S subunit, ATPase 5 [Source:HGNC Symbol;Acc:HGNC:9552]
ENSG00000088038	-0.301751	7.47123	0.392747	0.901101	CNOT3	19	54137749	54155681	1	CCR4-NOT transcription complex subunit 3 [Source:HGNC Symbol;Acc:HGNC:7879]
ENSG00000088325	0.346534	7.45211	0.282363	0.901101	TPX2	20	31739271	31801805	1	TPX2 microtubule nucleation factor [Source:HGNC Symbol;Acc:HGNC:1249]
ENSG00000088832	0.425624	7.89692	0.166239	0.901101	FKBP1A	20	1368977	1393164	-1	FKBP prolyl isomerase 1A [Source:HGNC Symbol;Acc:HGNC:3711]
ENSG00000088930	0.710604	6.8292	0.165295	0.901101	XRN2	20	21303331	21389825	1	5'-3' exoribonuclease 2 [Source:HGNC Symbol;Acc:HGNC:12836]
ENSG00000088986	0.272752	7.01087	0.425139	0.901101	DYNLL1	12	120469850	120498493	1	dynein light chain LC8-type 1 [Source:HGNC Symbol;Acc:HGNC:15476]
ENSG00000089009	0.43676	10.3542	0.285513	0.901101	RPL6	12	112405190	112418838	-1	ribosomal protein L6 [Source:HGNC Symbol;Acc:HGNC:10362]
ENSG00000089053	0.417642	7.14524	0.243555	0.901101	ANAPC5	12	121308245	121399896	-1	anaphase promoting complex subunit 5 [Source:HGNC Symbol;Acc:HGNC:15713]
ENSG00000089159	-0.218181	8.10383	0.483014	0.901101	PXN	12	120210439	120265771	-1	paxillin [Source:HGNC Symbol;Acc:HGNC:9718]
ENSG00000089220	0.31718	8.01457	0.332597	0.901101	PEBP1	12	118136124	118145584	1	phosphatidylethanolamine binding protein 1 [Source:HGNC Symbol;Acc:HGNC:8630]
ENSG00000089280	0.341095	8.40944	0.287948	0.901101	FUS	16	31180138	31191605	1	FUS RNA binding protein [Source:HGNC Symbol;Acc:HGNC:4010]
ENSG00000089327	-0.456965	7.59011	0.194031	0.901101	FXYD5	19	35154730	35169881	1	FXYD domain containing ion transport regulator 5 [Source:HGNC Symbol;Acc:HGNC:4029]
ENSG00000089351	-0.605995	8.29426	0.135651	0.901101	GRAMD1A	19	34994784	35026471	1	GRAM domain containing 1A [Source:HGNC Symbol;Acc:HGNC:29305]
ENSG00000089737	0.308771	7.52569	0.363421	0.901101	DDX24	14	94048287	94081212	-1	DEAD-box helicase 24 [Source:HGNC Symbol;Acc:HGNC:13266]
ENSG00000090006	-0.468766	9.81999	0.1603	0.901101	LTBP4	19	40592883	40629818	1	latent transforming growth factor beta binding protein 4 [Source:HGNC Symbol;Acc:HGNC:6717]
ENSG00000090013	-0.406485	7.5634	0.311622	0.901101	BLVRB	19	40447765	40465764	-1	biliverdin reductase B [Source:HGNC Symbol;Acc:HGNC:1063]
ENSG00000090060	0.785508	6.97736	0.274214	0.901101	PAPOLA	14	96501433	96567111	1	poly(A) polymerase alpha [Source:HGNC Symbol;Acc:HGNC:14981]
ENSG00000090372	-0.254565	8.42621	0.417919	0.901101	STRN4	19	46719511	46746994	-1	striatin 4 [Source:HGNC Symbol;Acc:HGNC:15721]
ENSG00000090621	0.261016	8.49858	0.456501	0.901101	PABPC4	1	39560709	39576790	-1	poly(A) binding protein cytoplasmic 4 [Source:HGNC Symbol;Acc:HGNC:8557]
ENSG00000091409	0.787827	6.94806	0.300145	0.901101	ITGA6	2	172427354	172506459	1	integrin subunit alpha 6 [Source:HGNC Symbol;Acc:HGNC:6142]
ENSG00000091527	0.630523	7.60455	0.313657	0.901101	CDV3	3	133573686	133590261	1	CDV3 homolog [Source:HGNC Symbol;Acc:HGNC:26928]
ENSG00000092148	0.801299	6.60416	0.378818	0.901101	HECTD1	14	31100112	31207804	-1	HECT domain E3 ubiquitin protein ligase 1 [Source:HGNC Symbol;Acc:HGNC:20157]
ENSG00000092199	0.363057	9.52791	0.277521	0.901101	HNRNPC	14	21209136	21269494	-1	heterogeneous nuclear ribonucleoprotein C [Source:HGNC Symbol;Acc:HGNC:5035]
ENSG00000092201	0.719725	7.93222	0.259832	0.901101	SUPT16H	14	21351476	21384019	-1	SPT16 homolog, facilitates chromatin remodeling subunit [Source:HGNC Symbol;Acc:HGNC:11465]
ENSG00000092621	-0.513309	8.4087	0.325303	0.901101	PHGDH	1	119648411	119744218	1	phosphoglycerate dehydrogenase [Source:HGNC Symbol;Acc:HGNC:8923]
ENSG00000095139	0.733946	7.21728	0.162328	0.901101	ARCN1	11	118572390	118603033	1	archain 1 [Source:HGNC Symbol;Acc:HGNC:649]
ENSG00000095787	0.540977	6.91927	0.489932	0.901101	WAC	10	28532493	28623112	1	WW domain containing adaptor with coiled-coil [Source:HGNC Symbol;Acc:HGNC:17327]
ENSG00000095906	-0.517348	8.25308	0.409907	0.901101	NUBP2	16	1782932	1789186	1	nucleotide binding protein 2 [Source:HGNC Symbol;Acc:HGNC:8042]
ENSG00000096384	0.423998	11.7962	0.284176	0.901101	HSP90AB1	6	44246166	44253888	1	heat shock protein 90 alpha family class B member 1 [Source:HGNC Symbol;Acc:HGNC:5258]
ENSG00000096433	-0.308952	8.90822	0.43125	0.901101	ITPR3	6	33620365	33696574	1	inositol 1,4,5-trisphosphate receptor type 3 [Source:HGNC Symbol;Acc:HGNC:6182]
ENSG00000096696	0.441734	8.15276	0.484985	0.901101	DSP	6	7541617	7586714	1	desmoplakin [Source:HGNC Symbol;Acc:HGNC:3052]
ENSG00000099204	0.876194	7.24911	0.137356	0.901101	ABLIM1	10	114431113	114768061	-1	actin binding LIM protein 1 [Source:HGNC Symbol;Acc:HGNC:78]
ENSG00000099331	-0.236269	7.40527	0.46182	0.901101	MYO9B	19	17075781	17214537	1	myosin IXB [Source:HGNC Symbol;Acc:HGNC:7609]
ENSG00000099399	0.483035	7.41185	0.132282	0.901101	MAGEB2	X	30215563	30220089	1	MAGE family member B2 [Source:HGNC Symbol;Acc:HGNC:6809]
ENSG00000099622	0.408897	8.19945	0.281576	0.901101	CIRBP	19	1259384	1274880	1	cold inducible RNA binding protein [Source:HGNC Symbol;Acc:HGNC:1982]
ENSG00000099624	-0.521094	8.85927	0.365166	0.901101	ATP5F1D	19	1241746	1244825	1	ATP synthase F1 subunit delta [Source:HGNC Symbol;Acc:HGNC:837]
ENSG00000099625	-0.782995	8.00186	0.204046	0.901101	CBARP	19	1228287	1238027	-1	CACN subunit beta associated regulatory protein [Source:HGNC Symbol;Acc:HGNC:28617]
ENSG00000099783	0.471513	8.74542	0.250885	0.901101	HNRNPM	19	8444767	8489114	1	heterogeneous nuclear ribonucleoprotein M [Source:HGNC Symbol;Acc:HGNC:5046]
ENSG00000099795	-0.330933	6.83122	0.463936	0.901101	NDUFB7	19	14566078	14572066	-1	NADH:ubiquinone oxidoreductase subunit B7 [Source:HGNC Symbol;Acc:HGNC:7702]
ENSG00000099797	-0.412468	7.85911	0.421712	0.901101	TECR	19	14517085	14565980	1	trans-2,3-enoyl-CoA reductase [Source:HGNC Symbol;Acc:HGNC:4551]
ENSG00000099804	-0.344157	7.69433	0.451342	0.901101	CDC34	19	531760	542092	1	cell division cycle 34, ubiqiutin conjugating enzyme [Source:HGNC Symbol;Acc:HGNC:1734]
ENSG00000099810	0.69365	6.81238	0.279068	0.901101	MTAP	9	21802636	21937651	1	methylthioadenosine phosphorylase [Source:HGNC Symbol;Acc:HGNC:7413]
ENSG00000099812	-0.410838	7.89385	0.428539	0.901101	MISP	19	751112	764318	1	mitotic spindle positioning [Source:HGNC Symbol;Acc:HGNC:27000]
ENSG00000099814	-0.25148	8.88835	0.477248	0.901101	CEP170B	14	104865268	104896770	1	centrosomal protein 170B [Source:HGNC Symbol;Acc:HGNC:20362]
ENSG00000099817	-0.348227	9.02983	0.468613	0.901101	POLR2E	19	1086574	1095380	-1	RNA polymerase II, I and III subunit E [Source:HGNC Symbol;Acc:HGNC:9192]
ENSG00000099821	-0.706768	9.58076	0.1605	0.901101	POLRMT	19	617221	633537	-1	RNA polymerase mitochondrial [Source:HGNC Symbol;Acc:HGNC:9200]
ENSG00000099864	-0.837751	7.24407	0.0420323	0.901101	PALM	19	708935	748329	1	paralemmin [Source:HGNC Symbol;Acc:HGNC:8594]
ENSG00000099875	-0.322157	9.4002	0.458229	0.901101	MKNK2	19	2037465	2051244	-1	MAPK interacting serine/threonine kinase 2 [Source:HGNC Symbol;Acc:HGNC:7111]
ENSG00000099901	0.353804	7.30855	0.277853	0.901101	RANBP1	22	20115938	20127355	1	RAN binding protein 1 [Source:HGNC Symbol;Acc:HGNC:9847]
ENSG00000099904	-0.375526	7.91389	0.255432	0.901101	ZDHHC8	22	20129456	20148007	1	zinc finger DHHC-type palmitoyltransferase 8 [Source:HGNC Symbol;Acc:HGNC:18474]
ENSG00000099991	-0.430276	7.5906	0.185758	0.901101	CABIN1	22	24011192	24178628	1	calcineurin binding protein 1 [Source:HGNC Symbol;Acc:HGNC:24187]
ENSG00000099994	-0.883852	8.01561	0.049177	0.901101	SUSD2	22	24181487	24189106	1	sushi domain containing 2 [Source:HGNC Symbol;Acc:HGNC:30667]
ENSG00000100030	0.631528	6.93937	0.256149	0.901101	MAPK1	22	21759657	21867680	-1	mitogen-activated protein kinase 1 [Source:HGNC Symbol;Acc:HGNC:6871]
ENSG00000100065	-0.410042	6.98284	0.198539	0.901101	CARD10	22	37490362	37519542	-1	caspase recruitment domain family member 10 [Source:HGNC Symbol;Acc:HGNC:16422]
ENSG00000100075	-0.515501	8.65789	0.397376	0.901101	SLC25A1	22	19175581	19178739	-1	solute carrier family 25 member 1 [Source:HGNC Symbol;Acc:HGNC:10979]
ENSG00000100083	-0.300505	7.45262	0.332672	0.901101	GGA1	22	37608725	37633564	1	golgi associated, gamma adaptin ear containing, ARF binding protein 1 [Source:HGNC Symbol;Acc:HGNC:17842]
ENSG00000100097	-0.36285	9.66171	0.339573	0.901101	LGALS1	22	37675636	37679802	1	galectin 1 [Source:HGNC Symbol;Acc:HGNC:6561]
ENSG00000100116	-0.414275	6.95769	0.31205	0.901101	GCAT	22	37807905	37817176	1	glycine C-acetyltransferase [Source:HGNC Symbol;Acc:HGNC:4188]
ENSG00000100201	0.762873	7.59659	0.331631	0.901101	DDX17	22	38483438	38507660	-1	DEAD-box helicase 17 [Source:HGNC Symbol;Acc:HGNC:2740]
ENSG00000100241	-0.451049	8.62209	0.168769	0.901101	SBF1	22	50445000	50475035	-1	SET binding factor 1 [Source:HGNC Symbol;Acc:HGNC:10542]
ENSG00000100243	-0.479987	8.88551	0.281048	0.901101	CYB5R3	22	42617840	42649392	-1	cytochrome b5 reductase 3 [Source:HGNC Symbol;Acc:HGNC:2873]
ENSG00000100258	-0.328102	7.28742	0.362213	0.901101	LMF2	22	50502949	50507702	-1	lipase maturation factor 2 [Source:HGNC Symbol;Acc:HGNC:25096]
ENSG00000100280	-0.328503	8.11306	0.43422	0.901101	AP1B1	22	29327680	29423179	-1	adaptor related protein complex 1 subunit beta 1 [Source:HGNC Symbol;Acc:HGNC:554]
ENSG00000100300	-0.374511	8.05369	0.418342	0.901101	TSPO	22	43151547	43163242	1	translocator protein [Source:HGNC Symbol;Acc:HGNC:1158]
ENSG00000100320	0.530828	7.26623	0.335614	0.901101	RBFOX2	22	35738736	36028824	-1	RNA binding fox-1 homolog 2 [Source:HGNC Symbol;Acc:HGNC:9906]
ENSG00000100380	0.569294	8.36028	0.217394	0.901101	ST13	22	40824535	40856639	-1	ST13 Hsp70 interacting protein [Source:HGNC Symbol;Acc:HGNC:11343]
ENSG00000100412	-0.312479	7.6902	0.343303	0.901101	ACO2	22	41447830	41529273	1	aconitase 2 [Source:HGNC Symbol;Acc:HGNC:118]
ENSG00000100504	0.493599	8.3031	0.334489	0.901101	PYGL	14	50857891	50944483	-1	glycogen phosphorylase L [Source:HGNC Symbol;Acc:HGNC:9725]
ENSG00000100591	0.443836	7.29882	0.231009	0.901101	AHSA1	14	77457870	77469472	1	activator of HSP90 ATPase activity 1 [Source:HGNC Symbol;Acc:HGNC:1189]
ENSG00000100605	-0.275378	7.25204	0.430179	0.901101	ITPK1	14	92936914	93116320	-1	inositol-tetrakisphosphate 1-kinase [Source:HGNC Symbol;Acc:HGNC:6177]
ENSG00000100632	0.781623	6.7468	0.0939334	0.901101	ERH	14	69380128	69398299	-1	ERH mRNA splicing and mitosis factor [Source:HGNC Symbol;Acc:HGNC:3447]
ENSG00000100650	0.736729	7.60619	0.223998	0.901101	SRSF5	14	69726900	69772005	1	serine and arginine rich splicing factor 5 [Source:HGNC Symbol;Acc:HGNC:10787]
ENSG00000100664	0.87646	7.38274	0.195475	0.901101	EIF5	14	103333544	103345025	1	eukaryotic translation initiation factor 5 [Source:HGNC Symbol;Acc:HGNC:3299]
ENSG00000100714	0.242509	7.05852	0.493415	0.901101	MTHFD1	14	64388031	64463457	1	methylenetetrahydrofolate dehydrogenase, cyclohydrolase and formyltetrahydrofolate synthetase 1 [Source:HGNC Symbol;Acc:HGNC:7432]
ENSG00000100811	0.41587	7.2956	0.427961	0.901101	YY1	14	100238298	100282788	1	YY1 transcription factor [Source:HGNC Symbol;Acc:HGNC:12856]
ENSG00000100823	0.246138	8.18627	0.44317	0.901101	APEX1	14	20455191	20457772	1	apurinic/apyrimidinic endodeoxyribonuclease 1 [Source:HGNC Symbol;Acc:HGNC:587]
ENSG00000100889	-0.527175	7.49933	0.495429	0.901101	PCK2	14	24094053	24110598	1	phosphoenolpyruvate carboxykinase 2, mitochondrial [Source:HGNC Symbol;Acc:HGNC:8725]
ENSG00000100941	0.976176	6.66052	0.397714	0.901101	PNN	14	39175183	39183220	1	pinin, desmosome associated protein [Source:HGNC Symbol;Acc:HGNC:9162]
ENSG00000101057	-0.425612	6.91641	0.451412	0.901101	MYBL2	20	43667019	43716495	1	MYB proto-oncogene like 2 [Source:HGNC Symbol;Acc:HGNC:7548]
ENSG00000101158	0.307753	6.70223	0.490448	0.901101	NELFCD	20	58981208	58995133	1	negative elongation factor complex member C/D [Source:HGNC Symbol;Acc:HGNC:15934]
ENSG00000101187	-0.420701	7.27231	0.18516	0.901101	SLCO4A1	20	62642503	62685785	1	solute carrier organic anion transporter family member 4A1 [Source:HGNC Symbol;Acc:HGNC:10953]
ENSG00000101188	-0.541618	10.2834	0.146915	0.901101	NTSR1	20	62708836	62762771	1	neurotensin receptor 1 [Source:HGNC Symbol;Acc:HGNC:8039]
ENSG00000101220	-0.365944	7.49064	0.46798	0.901101	C20orf27	20	3753508	3767781	-1	chromosome 20 open reading frame 27 [Source:HGNC Symbol;Acc:HGNC:15873]
ENSG00000101224	-0.366382	8.8324	0.280678	0.901101	CDC25B	20	3786772	3806121	1	cell division cycle 25B [Source:HGNC Symbol;Acc:HGNC:1726]
ENSG00000101266	0.477933	8.09693	0.326095	0.901101	CSNK2A1	20	472498	543835	-1	casein kinase 2 alpha 1 [Source:HGNC Symbol;Acc:HGNC:2457]
ENSG00000101310	0.489744	7.45068	0.223841	0.901101	SEC23B	20	18507520	18561415	1	SEC23 homolog B, COPII coat complex component [Source:HGNC Symbol;Acc:HGNC:10702]
ENSG00000101361	0.422186	8.2218	0.188535	0.901101	NOP56	20	2652593	2658393	1	NOP56 ribonucleoprotein [Source:HGNC Symbol;Acc:HGNC:15911]
ENSG00000101367	0.677175	7.44596	0.0722045	0.901101	MAPRE1	20	32819954	32850405	1	microtubule associated protein RP/EB family member 1 [Source:HGNC Symbol;Acc:HGNC:6890]
ENSG00000101421	0.33203	6.8962	0.333993	0.901101	CHMP4B	20	33811348	33854366	1	charged multivesicular body protein 4B [Source:HGNC Symbol;Acc:HGNC:16171]
ENSG00000101474	0.315113	7.47375	0.380317	0.901101	APMAP	20	24962925	24992751	-1	adipocyte plasma membrane associated protein [Source:HGNC Symbol;Acc:HGNC:13238]
ENSG00000101558	0.485265	7.41016	0.332705	0.901101	VAPA	18	9914016	9960021	1	VAMP associated protein A [Source:HGNC Symbol;Acc:HGNC:12648]
ENSG00000101608	0.470405	7.53496	0.191393	0.901101	MYL12A	18	3247481	3256236	1	myosin light chain 12A [Source:HGNC Symbol;Acc:HGNC:16701]
ENSG00000101940	-0.380437	7.07448	0.282112	0.901101	WDR13	X	48590042	48608869	1	WD repeat domain 13 [Source:HGNC Symbol;Acc:HGNC:14352]
ENSG00000102007	-0.282019	7.56393	0.479681	0.901101	PLP2	X	49171898	49175235	1	proteolipid protein 2 [Source:HGNC Symbol;Acc:HGNC:9087]
ENSG00000102172	0.530556	7.29128	0.150648	0.901101	SMS	X	21940709	21994837	1	spermine synthase [Source:HGNC Symbol;Acc:HGNC:11123]
ENSG00000102225	-0.422655	8.02958	0.205114	0.901101	CDK16	X	47217860	47229997	1	cyclin dependent kinase 16 [Source:HGNC Symbol;Acc:HGNC:8749]
ENSG00000102226	-0.35941	7.72859	0.373213	0.901101	USP11	X	47232866	47248328	1	ubiquitin specific peptidase 11 [Source:HGNC Symbol;Acc:HGNC:12609]
ENSG00000102265	-0.619354	8.36101	0.0809016	0.901101	TIMP1	X	47582408	47586789	1	TIMP metallopeptidase inhibitor 1 [Source:HGNC Symbol;Acc:HGNC:11820]
ENSG00000102317	0.874105	7.14283	0.0218633	0.901101	RBM3	X	48574449	48581162	1	RNA binding motif protein 3 [Source:HGNC Symbol;Acc:HGNC:9900]
ENSG00000102554	0.517597	7.11859	0.331875	0.901101	KLF5	13	73054976	73077541	1	Kruppel like factor 5 [Source:HGNC Symbol;Acc:HGNC:6349]
ENSG00000102699	0.678098	6.94245	0.237127	0.901101	PARP4	13	24420931	24512778	-1	poly(ADP-ribose) polymerase family member 4 [Source:HGNC Symbol;Acc:HGNC:271]
ENSG00000102804	0.61472	8.71793	0.277673	0.901101	TSC22D1	13	44432143	44577147	-1	TSC22 domain family member 1 [Source:HGNC Symbol;Acc:HGNC:16826]
ENSG00000102854	-0.493386	7.93034	0.187134	0.901101	MSLN	16	760734	768865	1	mesothelin [Source:HGNC Symbol;Acc:HGNC:7371]
ENSG00000102882	-0.435891	6.85298	0.361805	0.901101	MAPK3	16	30114105	30123506	-1	mitogen-activated protein kinase 3 [Source:HGNC Symbol;Acc:HGNC:6877]
ENSG00000102890	-0.281303	7.16108	0.382637	0.901101	ELMO3	16	67199111	67204029	1	engulfment and cell motility 3 [Source:HGNC Symbol;Acc:HGNC:17289]
ENSG00000102996	-0.51273	7.91179	0.111041	0.901101	MMP15	16	58025754	58046901	1	matrix metallopeptidase 15 [Source:HGNC Symbol;Acc:HGNC:7161]
ENSG00000103018	0.343767	9.05059	0.414526	0.901101	CYB5B	16	69424619	69466264	1	cytochrome b5 type B [Source:HGNC Symbol;Acc:HGNC:24374]
ENSG00000103024	-0.347761	7.52517	0.408113	0.901101	NME3	16	1770286	1771730	-1	NME/NM23 nucleoside diphosphate kinase 3 [Source:HGNC Symbol;Acc:HGNC:7851]
ENSG00000103044	0.761794	6.99617	0.037375	0.901101	HAS3	16	69105653	69118719	1	hyaluronan synthase 3 [Source:HGNC Symbol;Acc:HGNC:4820]
ENSG00000103148	-0.414963	6.74342	0.367765	0.901101	NPRL3	16	84271	138677	-1	NPR3 like, GATOR1 complex subunit [Source:HGNC Symbol;Acc:HGNC:14124]
ENSG00000103194	0.448511	7.70923	0.286078	0.901101	USP10	16	84699986	84779922	1	ubiquitin specific peptidase 10 [Source:HGNC Symbol;Acc:HGNC:12608]
ENSG00000103197	-0.251577	7.50962	0.449556	0.901101	TSC2	16	2047967	2089491	1	TSC complex subunit 2 [Source:HGNC Symbol;Acc:HGNC:12363]
ENSG00000103202	-0.388323	6.79721	0.346141	0.901101	NME4	16	396725	410367	1	NME/NM23 nucleoside diphosphate kinase 4 [Source:HGNC Symbol;Acc:HGNC:7852]
ENSG00000103253	-0.341358	6.85387	0.36735	0.901101	HAGHL	16	726936	735525	1	hydroxyacylglutathione hydrolase like [Source:HGNC Symbol;Acc:HGNC:14177]
ENSG00000103254	-0.509073	7.2971	0.228979	0.901101	ANTKMT	16	720581	722590	1	adenine nucleotide translocase lysine methyltransferase [Source:HGNC Symbol;Acc:HGNC:14152]
ENSG00000103260	-0.835756	9.04214	0.221238	0.901101	METRN	16	715118	719655	1	meteorin, glial cell differentiation regulator [Source:HGNC Symbol;Acc:HGNC:14151]
ENSG00000103326	-0.504234	7.48607	0.239815	0.901101	CAPN15	16	527712	554636	1	calpain 15 [Source:HGNC Symbol;Acc:HGNC:11182]
ENSG00000103342	0.398168	7.70509	0.264784	0.901101	GSPT1	16	11868128	11916082	-1	G1 to S phase transition 1 [Source:HGNC Symbol;Acc:HGNC:4621]
ENSG00000103353	0.467787	6.95534	0.248022	0.901101	UBFD1	16	23557721	23574389	1	ubiquitin family domain containing 1 [Source:HGNC Symbol;Acc:HGNC:30565]
ENSG00000103495	-0.65228	6.6287	0.398505	0.901101	MAZ	16	29806106	29811164	1	MYC associated zinc finger protein [Source:HGNC Symbol;Acc:HGNC:6914]
ENSG00000103502	-0.263321	6.96061	0.458807	0.901101	CDIPT	16	29858357	29863414	-1	CDP-diacylglycerol--inositol 3-phosphatidyltransferase [Source:HGNC Symbol;Acc:HGNC:1769]
ENSG00000103507	-0.369513	7.30856	0.371751	0.901101	BCKDK	16	31106107	31112791	1	branched chain keto acid dehydrogenase kinase [Source:HGNC Symbol;Acc:HGNC:16902]
ENSG00000103512	0.264812	7.95925	0.438261	0.901101	NOMO1	16	14833721	14896157	1	NODAL modulator 1 [Source:HGNC Symbol;Acc:HGNC:30060]
ENSG00000103653	-0.259655	7.3419	0.480982	0.901101	CSK	15	74782057	74803198	1	C-terminal Src kinase [Source:HGNC Symbol;Acc:HGNC:2444]
ENSG00000103769	0.699324	6.73667	0.138857	0.901101	RAB11A	15	65726054	65891989	1	RAB11A, member RAS oncogene family [Source:HGNC Symbol;Acc:HGNC:9760]
ENSG00000103855	-0.285311	7.26076	0.398197	0.901101	CD276	15	73683966	73714514	1	CD276 molecule [Source:HGNC Symbol;Acc:HGNC:19137]
ENSG00000104067	0.672439	6.7351	0.413107	0.901101	TJP1	15	29699367	29968915	-1	tight junction protein 1 [Source:HGNC Symbol;Acc:HGNC:11827]
ENSG00000104341	0.515409	8.66493	0.125507	0.901101	LAPTM4B	8	97775057	97853013	1	lysosomal protein transmembrane 4 beta [Source:HGNC Symbol;Acc:HGNC:13646]
ENSG00000104408	0.586821	8.63505	0.23456	0.901101	EIF3E	8	108162787	108443496	-1	eukaryotic translation initiation factor 3 subunit E [Source:HGNC Symbol;Acc:HGNC:3277]
ENSG00000104413	0.638854	7.43369	0.349513	0.901101	ESRP1	8	94641074	94707466	1	epithelial splicing regulatory protein 1 [Source:HGNC Symbol;Acc:HGNC:25966]
ENSG00000104517	0.760059	6.81791	0.364967	0.901101	UBR5	8	102252273	102412759	-1	ubiquitin protein ligase E3 component n-recognin 5 [Source:HGNC Symbol;Acc:HGNC:16806]
ENSG00000104518	-0.438625	7.22642	0.208228	0.901101	GSDMD	8	143553207	143563062	1	gasdermin D [Source:HGNC Symbol;Acc:HGNC:25697]
ENSG00000104635	0.551607	7.45267	0.407927	0.901101	SLC39A14	8	22367278	22434129	1	solute carrier family 39 member 14 [Source:HGNC Symbol;Acc:HGNC:20858]
ENSG00000104687	0.520415	7.62572	0.175413	0.901101	GSR	8	30678066	30727846	-1	glutathione-disulfide reductase [Source:HGNC Symbol;Acc:HGNC:4623]
ENSG00000104738	0.467018	7.04831	0.366248	0.901101	MCM4	8	47960185	47978160	1	minichromosome maintenance complex component 4 [Source:HGNC Symbol;Acc:HGNC:6947]
ENSG00000104774	-0.381969	6.70841	0.377354	0.901101	MAN2B1	19	12646511	12666742	-1	mannosidase alpha class 2B member 1 [Source:HGNC Symbol;Acc:HGNC:6826]
ENSG00000104805	-0.440035	7.62724	0.193875	0.901101	NUCB1	19	48900312	48923372	1	nucleobindin 1 [Source:HGNC Symbol;Acc:HGNC:8043]
ENSG00000104833	-0.581068	7.04631	0.382992	0.901101	TUBB4A	19	6494319	6502848	-1	tubulin beta 4A class IVa [Source:HGNC Symbol;Acc:HGNC:20774]
ENSG00000104859	-0.367545	7.31971	0.340821	0.901101	CLASRP	19	45039045	45070956	1	CLK4 associating serine/arginine rich protein [Source:HGNC Symbol;Acc:HGNC:17731]
ENSG00000104866	-0.348689	6.74997	0.38761	0.901101	PPP1R37	19	45091396	45148077	1	protein phosphatase 1 regulatory subunit 37 [Source:HGNC Symbol;Acc:HGNC:27607]
ENSG00000104881	-0.602459	7.82552	0.110357	0.901101	PPP1R13L	19	45379638	45406349	-1	protein phosphatase 1 regulatory subunit 13 like [Source:HGNC Symbol;Acc:HGNC:18838]
ENSG00000104884	-0.460448	7.69781	0.21722	0.901101	ERCC2	19	45349837	45370918	-1	ERCC excision repair 2, TFIIH core complex helicase subunit [Source:HGNC Symbol;Acc:HGNC:3434]
ENSG00000104885	-0.266106	7.23957	0.383346	0.901101	DOT1L	19	2163933	2232578	1	DOT1 like histone lysine methyltransferase [Source:HGNC Symbol;Acc:HGNC:24948]
ENSG00000104897	-0.95729	9.10239	0.168489	0.901101	SF3A2	19	2236824	2248655	1	splicing factor 3a subunit 2 [Source:HGNC Symbol;Acc:HGNC:10766]
ENSG00000104960	-0.810497	7.21815	0.111975	0.901101	PTOV1	19	49850735	49860744	1	PTOV1 extended AT-hook containing adaptor protein [Source:HGNC Symbol;Acc:HGNC:9632]
ENSG00000104973	-0.491292	7.20018	0.294236	0.901101	MED25	19	49818282	49840383	1	mediator complex subunit 25 [Source:HGNC Symbol;Acc:HGNC:28845]
ENSG00000104976	-0.608036	7.13832	0.268625	0.901101	SNAPC2	19	7920338	7923250	1	small nuclear RNA activating complex polypeptide 2 [Source:HGNC Symbol;Acc:HGNC:11135]
ENSG00000105048	-0.350464	7.6352	0.313053	0.901101	TNNT1	19	55132698	55149206	-1	troponin T1, slow skeletal type [Source:HGNC Symbol;Acc:HGNC:11948]
ENSG00000105063	-0.368057	8.53355	0.268849	0.901101	PPP6R1	19	55229779	55259017	-1	protein phosphatase 6 regulatory subunit 1 [Source:HGNC Symbol;Acc:HGNC:29195]
ENSG00000105088	-0.435305	6.91877	0.225577	0.901101	OLFM2	19	9853718	9936552	-1	olfactomedin 2 [Source:HGNC Symbol;Acc:HGNC:17189]
ENSG00000105135	-0.501094	7.23751	0.246292	0.901101	ILVBL	19	15114984	15125786	-1	ilvB acetolactate synthase like [Source:HGNC Symbol;Acc:HGNC:6041]
ENSG00000105193	-0.287393	11.0154	0.378919	0.901101	RPS16	19	39433137	39435949	-1	ribosomal protein S16 [Source:HGNC Symbol;Acc:HGNC:10396]
ENSG00000105223	-0.553868	9.1709	0.156824	0.901101	PLD3	19	40348456	40380439	1	phospholipase D family member 3 [Source:HGNC Symbol;Acc:HGNC:17158]
ENSG00000105245	-0.283347	6.78722	0.415281	0.901101	NUMBL	19	40665905	40690972	-1	NUMB like endocytic adaptor protein [Source:HGNC Symbol;Acc:HGNC:8061]
ENSG00000105287	-0.349714	7.21942	0.290801	0.901101	PRKD2	19	46674275	46717127	-1	protein kinase D2 [Source:HGNC Symbol;Acc:HGNC:17293]
ENSG00000105289	-0.466812	7.66513	0.162035	0.901101	TJP3	19	3708362	3750813	1	tight junction protein 3 [Source:HGNC Symbol;Acc:HGNC:11829]
ENSG00000105290	-0.55912	7.06167	0.224315	0.901101	APLP1	19	35867899	35879792	1	amyloid beta precursor like protein 1 [Source:HGNC Symbol;Acc:HGNC:597]
ENSG00000105325	-0.278257	7.24776	0.4748	0.901101	FZR1	19	3506311	3538334	1	fizzy and cell division cycle 20 related 1 [Source:HGNC Symbol;Acc:HGNC:24824]
ENSG00000105327	-0.329762	7.33223	0.478511	0.901101	BBC3	19	47220822	47232766	-1	BCL2 binding component 3 [Source:HGNC Symbol;Acc:HGNC:17868]
ENSG00000105329	-0.539742	8.31127	0.253274	0.901101	TGFB1	19	41301587	41353922	-1	transforming growth factor beta 1 [Source:HGNC Symbol;Acc:HGNC:11766]
ENSG00000105355	-0.447256	9.22435	0.289766	0.901101	PLIN3	19	4838341	4867694	-1	perilipin 3 [Source:HGNC Symbol;Acc:HGNC:16893]
ENSG00000105357	-0.365937	8.00764	0.248406	0.901101	MYH14	19	50188186	50310542	1	myosin heavy chain 14 [Source:HGNC Symbol;Acc:HGNC:23212]
ENSG00000105364	-0.45943	7.98458	0.325219	0.901101	MRPL4	19	10251901	10260055	1	mitochondrial ribosomal protein L4 [Source:HGNC Symbol;Acc:HGNC:14276]
ENSG00000105372	-0.218666	10.8481	0.499401	0.901101	RPS19	19	41860255	41872925	1	ribosomal protein S19 [Source:HGNC Symbol;Acc:HGNC:10402]
ENSG00000105373	-0.473043	9.99123	0.255167	0.901101	NOP53	19	47745546	47757058	1	NOP53 ribosome biogenesis factor [Source:HGNC Symbol;Acc:HGNC:4333]
ENSG00000105376	-0.480842	6.94444	0.257359	0.901101	ICAM5	19	10289952	10296778	1	intercellular adhesion molecule 5 [Source:HGNC Symbol;Acc:HGNC:5348]
ENSG00000105401	0.238861	8.91389	0.461638	0.901101	CDC37	19	10391133	10420121	-1	cell division cycle 37, HSP90 cochaperone [Source:HGNC Symbol;Acc:HGNC:1735]
ENSG00000105419	-0.934798	6.93311	0.0626927	0.901101	MEIS3	19	47403124	47419527	-1	Meis homeobox 3 [Source:HGNC Symbol;Acc:HGNC:29537]
ENSG00000105464	-0.888237	8.34769	0.16113	0.901101	GRIN2D	19	48394875	48444931	1	glutamate ionotropic receptor NMDA type subunit 2D [Source:HGNC Symbol;Acc:HGNC:4588]
ENSG00000105516	-1.19958	6.92256	0.0429065	0.901101	DBP	19	48630030	48637379	-1	D-box binding PAR bZIP transcription factor [Source:HGNC Symbol;Acc:HGNC:2697]
ENSG00000105520	-0.74036	6.86637	0.103026	0.901101	PLPPR2	19	11355386	11365698	1	phospholipid phosphatase related 2 [Source:HGNC Symbol;Acc:HGNC:29566]
ENSG00000105640	-0.38941	11.8879	0.382463	0.901101	RPL18A	19	17859910	17864153	1	ribosomal protein L18a [Source:HGNC Symbol;Acc:HGNC:10311]
ENSG00000105655	-0.314165	10.003	0.494108	0.901101	ISYNA1	19	18434388	18438167	-1	inositol-3-phosphate synthase 1 [Source:HGNC Symbol;Acc:HGNC:29821]
ENSG00000105669	-0.391798	7.65411	0.390517	0.901101	COPE	19	18899514	18919387	-1	COPI coat complex subunit epsilon [Source:HGNC Symbol;Acc:HGNC:2234]
ENSG00000105699	-0.536295	9.95507	0.190294	0.901101	LSR	19	35248330	35267964	1	lipolysis stimulated lipoprotein receptor [Source:HGNC Symbol;Acc:HGNC:29572]
ENSG00000105701	-0.620235	10.0153	0.238117	0.901101	FKBP8	19	18531751	18544077	-1	FKBP prolyl isomerase 8 [Source:HGNC Symbol;Acc:HGNC:3724]
ENSG00000105722	-0.706965	8.17805	0.164975	0.901101	ERF	19	42247569	42255128	-1	ETS2 repressor factor [Source:HGNC Symbol;Acc:HGNC:3444]
ENSG00000105887	0.750279	7.31716	0.194158	0.901101	MTPN	7	135926760	135977359	-1	myotrophin [Source:HGNC Symbol;Acc:HGNC:15667]
ENSG00000105953	-0.222014	8.23899	0.468094	0.901101	OGDH	7	44606572	44709066	1	oxoglutarate dehydrogenase [Source:HGNC Symbol;Acc:HGNC:8124]
ENSG00000105968	0.302961	6.83059	0.398797	0.901101	H2AZ2	7	44826791	44848087	-1	H2A.Z variant histone 2 [Source:HGNC Symbol;Acc:HGNC:20664]
ENSG00000105971	0.753557	7.22004	0.124374	0.901101	CAV2	7	116287380	116508541	1	caveolin 2 [Source:HGNC Symbol;Acc:HGNC:1528]
ENSG00000105974	1.07618	7.73456	0.0155236	0.901101	CAV1	7	116524994	116561179	1	caveolin 1 [Source:HGNC Symbol;Acc:HGNC:1527]
ENSG00000105976	0.557962	7.68579	0.474323	0.901101	MET	7	116672196	116798377	1	MET proto-oncogene, receptor tyrosine kinase [Source:HGNC Symbol;Acc:HGNC:7029]
ENSG00000105993	0.699133	7.06394	0.10144	0.901101	DNAJB6	7	157335381	157417439	1	DnaJ heat shock protein family (Hsp40) member B6 [Source:HGNC Symbol;Acc:HGNC:14888]
ENSG00000106009	-0.516544	7.92081	0.282055	0.901101	BRAT1	7	2537810	2555694	-1	BRCA1 associated ATM activator 1 [Source:HGNC Symbol;Acc:HGNC:21701]
ENSG00000106105	0.505909	8.03892	0.345873	0.901101	GARS1	7	30580533	30634033	1	glycyl-tRNA synthetase 1 [Source:HGNC Symbol;Acc:HGNC:4162]
ENSG00000106211	-0.54639	10.1552	0.428424	0.901101	HSPB1	7	76302673	76304295	1	heat shock protein family B (small) member 1 [Source:HGNC Symbol;Acc:HGNC:5246]
ENSG00000106244	0.319139	8.32077	0.312504	0.901101	PDAP1	7	99392048	99408597	-1	PDGFA associated protein 1 [Source:HGNC Symbol;Acc:HGNC:14634]
ENSG00000106348	-0.284905	7.96059	0.470904	0.901101	IMPDH1	7	128392277	128410252	-1	inosine monophosphate dehydrogenase 1 [Source:HGNC Symbol;Acc:HGNC:6052]
ENSG00000106397	-0.319078	8.28671	0.320402	0.901101	PLOD3	7	101205977	101218420	-1	procollagen-lysine,2-oxoglutarate 5-dioxygenase 3 [Source:HGNC Symbol;Acc:HGNC:9083]
ENSG00000106628	-0.327118	8.70968	0.497949	0.901101	POLD2	7	44114681	44124358	-1	DNA polymerase delta 2, accessory subunit [Source:HGNC Symbol;Acc:HGNC:9176]
ENSG00000106665	-0.372402	7.60207	0.26115	0.901101	CLIP2	7	74289407	74405935	1	CAP-Gly domain containing linker protein 2 [Source:HGNC Symbol;Acc:HGNC:2586]
ENSG00000106682	0.33695	9.2492	0.320732	0.901101	EIF4H	7	74174231	74197122	1	eukaryotic translation initiation factor 4H [Source:HGNC Symbol;Acc:HGNC:12741]
ENSG00000106683	-0.425064	7.90414	0.210789	0.901101	LIMK1	7	74082933	74122525	1	LIM domain kinase 1 [Source:HGNC Symbol;Acc:HGNC:6613]
ENSG00000107164	0.583364	6.97279	0.316891	0.901101	FUBP3	9	130578965	130638352	1	far upstream element binding protein 3 [Source:HGNC Symbol;Acc:HGNC:4005]
ENSG00000107281	-0.540211	8.05777	0.218359	0.901101	NPDC1	9	137039463	137046179	-1	neural proliferation, differentiation and control 1 [Source:HGNC Symbol;Acc:HGNC:7899]
ENSG00000107331	-0.506422	9.37567	0.150854	0.901101	ABCA2	9	137007234	137028922	-1	ATP binding cassette subfamily A member 2 [Source:HGNC Symbol;Acc:HGNC:32]
ENSG00000107372	0.431575	7.35249	0.368207	0.901101	ZFAND5	9	72351413	72365235	-1	zinc finger AN1-type containing 5 [Source:HGNC Symbol;Acc:HGNC:13008]
ENSG00000107404	-0.516292	9.49989	0.213115	0.901101	DVL1	1	1335276	1349418	-1	dishevelled segment polarity protein 1 [Source:HGNC Symbol;Acc:HGNC:3084]
ENSG00000107581	0.589469	9.08315	0.410459	0.901101	EIF3A	10	119033670	119080823	-1	eukaryotic translation initiation factor 3 subunit A [Source:HGNC Symbol;Acc:HGNC:3271]
ENSG00000107651	0.812574	6.7788	0.164942	0.901101	SEC23IP	10	119892730	119944657	1	SEC23 interacting protein [Source:HGNC Symbol;Acc:HGNC:17018]
ENSG00000107815	0.429147	6.97206	0.272869	0.901101	TWNK	10	100987367	100994403	1	twinkle mtDNA helicase [Source:HGNC Symbol;Acc:HGNC:1160]
ENSG00000107902	-0.529366	6.76858	0.197611	0.901101	LHPP	10	124461823	124617888	1	phospholysine phosphohistidine inorganic pyrophosphate phosphatase [Source:HGNC Symbol;Acc:HGNC:30042]
ENSG00000107929	0.438195	6.83259	0.512772	0.901101	LARP4B	10	806914	931705	-1	La ribonucleoprotein 4B [Source:HGNC Symbol;Acc:HGNC:28987]
ENSG00000107937	0.740975	6.86481	0.218043	0.901101	GTPBP4	10	988434	1019932	1	GTP binding protein 4 [Source:HGNC Symbol;Acc:HGNC:21535]
ENSG00000107984	0.533993	7.25596	0.115782	0.901101	DKK1	10	52314281	52318042	1	dickkopf WNT signaling pathway inhibitor 1 [Source:HGNC Symbol;Acc:HGNC:2891]
ENSG00000108106	-0.507111	9.63212	0.346861	0.901101	UBE2S	19	55399745	55407788	-1	ubiquitin conjugating enzyme E2 S [Source:HGNC Symbol;Acc:HGNC:17895]
ENSG00000108107	-0.343178	11.1823	0.432469	0.901101	RPL28	19	55385932	55403250	1	ribosomal protein L28 [Source:HGNC Symbol;Acc:HGNC:10330]
ENSG00000108179	0.28486	7.15567	0.401143	0.901101	PPIF	10	79347469	79355334	1	peptidylprolyl isomerase F [Source:HGNC Symbol;Acc:HGNC:9259]
ENSG00000108219	0.283627	7.27543	0.434144	0.901101	TSPAN14	10	80454166	80533124	1	tetraspanin 14 [Source:HGNC Symbol;Acc:HGNC:23303]
ENSG00000108262	-0.28388	8.22691	0.400103	0.901101	GIT1	17	29573475	29594054	-1	GIT ArfGAP 1 [Source:HGNC Symbol;Acc:HGNC:4272]
ENSG00000108424	0.734327	8.26932	0.24057	0.901101	KPNB1	17	47649476	47685505	1	karyopherin subunit beta 1 [Source:HGNC Symbol;Acc:HGNC:6400]
ENSG00000108468	0.777567	6.82255	0.212937	0.901101	CBX1	17	48070052	48101478	-1	chromobox 1 [Source:HGNC Symbol;Acc:HGNC:1551]
ENSG00000108479	-0.74048	6.90919	0.148577	0.901101	GALK1	17	75751594	75765236	-1	galactokinase 1 [Source:HGNC Symbol;Acc:HGNC:4118]
ENSG00000108528	-0.346754	7.16813	0.395827	0.901101	SLC25A11	17	4937130	4940053	-1	solute carrier family 25 member 11 [Source:HGNC Symbol;Acc:HGNC:10981]
ENSG00000108561	0.288064	9.08826	0.351129	0.901101	C1QBP	17	5432777	5448830	-1	complement C1q binding protein [Source:HGNC Symbol;Acc:HGNC:1243]
ENSG00000108588	0.873878	7.05208	0.191168	0.901101	CCDC47	17	63745255	63776351	-1	coiled-coil domain containing 47 [Source:HGNC Symbol;Acc:HGNC:24856]
ENSG00000108592	0.43783	6.92505	0.252858	0.901101	FTSJ3	17	63819433	63830012	-1	FtsJ RNA 2'-O-methyltransferase 3 [Source:HGNC Symbol;Acc:HGNC:17136]
ENSG00000108654	0.980569	8.89952	0.18583	0.901101	DDX5	17	64498254	64508199	-1	DEAD-box helicase 5 [Source:HGNC Symbol;Acc:HGNC:2746]
ENSG00000108671	0.541057	6.87778	0.164741	0.901101	PSMD11	17	32444379	32483319	1	proteasome 26S subunit, non-ATPase 11 [Source:HGNC Symbol;Acc:HGNC:9556]
ENSG00000108679	-0.235155	10.2021	0.456788	0.901101	LGALS3BP	17	78971238	78979947	-1	galectin 3 binding protein [Source:HGNC Symbol;Acc:HGNC:6564]
ENSG00000108819	-0.191574	8.43072	0.509215	0.901101	PPP1R9B	17	50133737	50150677	-1	protein phosphatase 1 regulatory subunit 9B [Source:HGNC Symbol;Acc:HGNC:9298]
ENSG00000108828	-0.471869	8.93293	0.238324	0.901101	VAT1	17	43014607	43025123	-1	vesicle amine transport 1 [Source:HGNC Symbol;Acc:HGNC:16919]
ENSG00000108840	-0.626	7.06257	0.10166	0.901101	HDAC5	17	44076746	44123702	-1	histone deacetylase 5 [Source:HGNC Symbol;Acc:HGNC:14068]
ENSG00000108848	1.22778	6.99307	0.310563	0.901101	LUC7L3	17	50719565	50756219	1	LUC7 like 3 pre-mRNA splicing factor [Source:HGNC Symbol;Acc:HGNC:24309]
ENSG00000108854	0.828199	7.65964	0.302535	0.901101	SMURF2	17	64542282	64662307	-1	SMAD specific E3 ubiquitin protein ligase 2 [Source:HGNC Symbol;Acc:HGNC:16809]
ENSG00000108946	0.808695	7.44371	0.187535	0.901101	PRKAR1A	17	68511780	68551319	1	protein kinase cAMP-dependent type I regulatory subunit alpha [Source:HGNC Symbol;Acc:HGNC:9388]
ENSG00000108953	0.469681	9.0937	0.175292	0.901101	YWHAE	17	1344275	1400222	-1	tyrosine 3-monooxygenase/tryptophan 5-monooxygenase activation protein epsilon [Source:HGNC Symbol;Acc:HGNC:12851]
ENSG00000109062	-0.282175	8.42382	0.482597	0.901101	SLC9A3R1	17	74748628	74769353	1	SLC9A3 regulator 1 [Source:HGNC Symbol;Acc:HGNC:11075]
ENSG00000109111	0.390689	7.9049	0.233291	0.901101	SUPT6H	17	28662198	28702679	1	SPT6 homolog, histone chaperone and transcription elongation factor [Source:HGNC Symbol;Acc:HGNC:11470]
ENSG00000109332	0.610858	7.76557	0.132433	0.901101	UBE2D3	4	102794383	102868896	-1	ubiquitin conjugating enzyme E2 D3 [Source:HGNC Symbol;Acc:HGNC:12476]
ENSG00000109475	0.263256	8.40257	0.48312	0.901101	RPL34	4	108620566	108630412	1	ribosomal protein L34 [Source:HGNC Symbol;Acc:HGNC:10340]
ENSG00000109501	-0.340461	7.01363	0.378096	0.901101	WFS1	4	6269849	6303265	1	wolframin ER transmembrane glycoprotein [Source:HGNC Symbol;Acc:HGNC:12762]
ENSG00000109606	0.862427	7.10777	0.140725	0.901101	DHX15	4	24517441	24584554	-1	DEAH-box helicase 15 [Source:HGNC Symbol;Acc:HGNC:2738]
ENSG00000109736	-0.200474	8.20587	0.501826	0.901101	MFSD10	4	2930561	2934834	-1	major facilitator superfamily domain containing 10 [Source:HGNC Symbol;Acc:HGNC:16894]
ENSG00000109971	0.507907	10.0302	0.296793	0.901101	HSPA8	11	123057489	123063230	-1	heat shock protein family A (Hsp70) member 8 [Source:HGNC Symbol;Acc:HGNC:5241]
ENSG00000110048	0.514194	6.83995	0.35244	0.901101	OSBP	11	59574398	59615774	-1	oxysterol binding protein [Source:HGNC Symbol;Acc:HGNC:8503]
ENSG00000110092	0.667247	10.1336	0.112319	0.901101	CCND1	11	69641156	69654474	1	cyclin D1 [Source:HGNC Symbol;Acc:HGNC:1582]
ENSG00000110104	-0.260088	7.11271	0.506263	0.901101	CCDC86	11	60842113	60851081	1	coiled-coil domain containing 86 [Source:HGNC Symbol;Acc:HGNC:28359]
ENSG00000110321	0.860365	9.17192	0.0864468	0.901101	EIF4G2	11	10797050	10808940	-1	eukaryotic translation initiation factor 4 gamma 2 [Source:HGNC Symbol;Acc:HGNC:3297]
ENSG00000110367	0.856547	6.68448	0.174241	0.901101	DDX6	11	118747763	118791164	-1	DEAD-box helicase 6 [Source:HGNC Symbol;Acc:HGNC:2747]
ENSG00000110492	-0.342528	8.91069	0.433668	0.901101	MDK	11	46380756	46383837	1	midkine [Source:HGNC Symbol;Acc:HGNC:6972]
ENSG00000110628	-0.801468	7.06328	0.100911	0.901101	SLC22A18	11	2899721	2925246	1	solute carrier family 22 member 18 [Source:HGNC Symbol;Acc:HGNC:10964]
ENSG00000110696	0.912183	6.94977	0.166073	0.901101	C11orf58	11	16613132	16758340	1	chromosome 11 open reading frame 58 [Source:HGNC Symbol;Acc:HGNC:16990]
ENSG00000110697	-0.792796	8.85979	0.0801281	0.901101	PITPNM1	11	67491768	67506263	-1	phosphatidylinositol transfer protein membrane associated 1 [Source:HGNC Symbol;Acc:HGNC:9003]
ENSG00000110713	0.462476	7.07938	0.327726	0.901101	NUP98	11	3671083	3797792	-1	nucleoporin 98 and 96 precursor [Source:HGNC Symbol;Acc:HGNC:8068]
ENSG00000110717	-0.35268	7.65836	0.462642	0.901101	NDUFS8	11	68030617	68036644	1	NADH:ubiquinone oxidoreductase core subunit S8 [Source:HGNC Symbol;Acc:HGNC:7715]
ENSG00000110880	0.527662	6.83483	0.2522	0.901101	CORO1C	12	108645109	108731526	-1	coronin 1C [Source:HGNC Symbol;Acc:HGNC:2254]
ENSG00000110917	0.479078	7.94814	0.29125	0.901101	MLEC	12	120687149	120701859	1	malectin [Source:HGNC Symbol;Acc:HGNC:28973]
ENSG00000110958	0.622069	8.29625	0.0991388	0.901101	PTGES3	12	56663341	56688408	-1	prostaglandin E synthase 3 [Source:HGNC Symbol;Acc:HGNC:16049]
ENSG00000111142	1.14488	6.66554	0.196186	0.901101	METAP2	12	95473520	95515839	1	methionyl aminopeptidase 2 [Source:HGNC Symbol;Acc:HGNC:16672]
ENSG00000111144	0.519376	7.11243	0.318679	0.901101	LTA4H	12	96000753	96043520	-1	leukotriene A4 hydrolase [Source:HGNC Symbol;Acc:HGNC:6710]
ENSG00000111328	0.617196	7.01136	0.0851161	0.901101	CDK2AP1	12	123250112	123272334	-1	cyclin dependent kinase 2 associated protein 1 [Source:HGNC Symbol;Acc:HGNC:14002]
ENSG00000111371	0.869344	7.63833	0.319606	0.901101	SLC38A1	12	46183063	46270017	-1	solute carrier family 38 member 1 [Source:HGNC Symbol;Acc:HGNC:13447]
ENSG00000111786	0.286397	7.5363	0.394304	0.901101	SRSF9	12	120461672	120469748	-1	serine and arginine rich splicing factor 9 [Source:HGNC Symbol;Acc:HGNC:10791]
ENSG00000112081	0.801067	7.88531	0.062387	0.901101	SRSF3	6	36594353	36605600	1	serine and arginine rich splicing factor 3 [Source:HGNC Symbol;Acc:HGNC:10785]
ENSG00000112306	0.355694	10.081	0.298464	0.901101	RPS12	6	132814569	132817564	1	ribosomal protein S12 [Source:HGNC Symbol;Acc:HGNC:10385]
ENSG00000112335	0.461379	6.9539	0.194105	0.901101	SNX3	6	108211222	108261246	-1	sorting nexin 3 [Source:HGNC Symbol;Acc:HGNC:11174]
ENSG00000112378	0.840929	7.68325	0.033415	0.901101	PERP	6	138088505	138107419	-1	p53 apoptosis effector related to PMP22 [Source:HGNC Symbol;Acc:HGNC:17637]
ENSG00000112473	0.288259	7.80564	0.509959	0.901101	SLC39A7	6	33200445	33204439	1	solute carrier family 39 member 7 [Source:HGNC Symbol;Acc:HGNC:4927]
ENSG00000112559	-0.441295	6.70335	0.337772	0.901101	MDFI	6	41636882	41654244	1	MyoD family inhibitor [Source:HGNC Symbol;Acc:HGNC:6967]
ENSG00000112667	-0.294157	7.79859	0.41086	0.901101	DNPH1	6	43225629	43229481	-1	2'-deoxynucleoside 5'-phosphate N-hydrolase 1 [Source:HGNC Symbol;Acc:HGNC:21218]
ENSG00000112787	-0.653259	9.6079	0.258523	0.901101	FBRSL1	12	132489551	132585188	1	fibrosin like 1 [Source:HGNC Symbol;Acc:HGNC:29308]
ENSG00000112977	0.250124	7.6423	0.434981	0.901101	DAP	5	10679230	10761234	-1	death associated protein [Source:HGNC Symbol;Acc:HGNC:2672]
ENSG00000113013	0.672995	9.2872	0.256175	0.901101	HSPA9	5	138553756	138575675	-1	heat shock protein family A (Hsp70) member 9 [Source:HGNC Symbol;Acc:HGNC:5244]
ENSG00000113407	0.893473	7.50147	0.168743	0.901101	TARS1	5	33440696	33468091	1	threonyl-tRNA synthetase 1 [Source:HGNC Symbol;Acc:HGNC:11572]
ENSG00000113504	-0.21011	6.97862	0.511898	0.901101	SLC12A7	5	1050384	1112063	-1	solute carrier family 12 member 7 [Source:HGNC Symbol;Acc:HGNC:10915]
ENSG00000113643	1.0376	6.529	0.154705	0.901101	RARS1	5	168486451	168519301	1	arginyl-tRNA synthetase 1 [Source:HGNC Symbol;Acc:HGNC:9870]
ENSG00000113645	0.339237	6.9516	0.371422	0.901101	WWC1	5	168291645	168472303	1	WW and C2 domain containing 1 [Source:HGNC Symbol;Acc:HGNC:29435]
ENSG00000113648	0.205619	8.0412	0.500792	0.901101	MACROH2A1	5	135333900	135399914	-1	macroH2A.1 histone [Source:HGNC Symbol;Acc:HGNC:4740]
ENSG00000113739	0.72011	7.48659	0.436705	0.901101	STC2	5	173314713	173329503	-1	stanniocalcin 2 [Source:HGNC Symbol;Acc:HGNC:11374]
ENSG00000114354	0.478242	6.86149	0.264538	0.901101	TFG	3	100709295	100748964	1	trafficking from ER to golgi regulator [Source:HGNC Symbol;Acc:HGNC:11758]
ENSG00000114416	0.860462	6.87344	0.287759	0.901101	FXR1	3	180868141	180982753	1	FMR1 autosomal homolog 1 [Source:HGNC Symbol;Acc:HGNC:4023]
ENSG00000114650	-0.419733	8.02787	0.235153	0.901101	SCAP	3	47413681	47477126	-1	SREBF chaperone [Source:HGNC Symbol;Acc:HGNC:30634]
ENSG00000114686	0.844424	6.7476	0.087024	0.901101	MRPL3	3	131462212	131502983	-1	mitochondrial ribosomal protein L3 [Source:HGNC Symbol;Acc:HGNC:10379]
ENSG00000114767	-0.313801	7.6896	0.424175	0.901101	RRP9	3	51933429	51941904	-1	ribosomal RNA processing 9, U3 small nucleolar RNA binding protein [Source:HGNC Symbol;Acc:HGNC:16829]
ENSG00000114850	0.776272	7.03626	0.0794527	0.901101	SSR3	3	156539553	156555149	-1	signal sequence receptor subunit 3 [Source:HGNC Symbol;Acc:HGNC:11325]
ENSG00000114942	0.251932	9.35086	0.433512	0.901101	EEF1B2	2	206159585	206162928	1	eukaryotic translation elongation factor 1 beta 2 [Source:HGNC Symbol;Acc:HGNC:3208]
ENSG00000114978	0.806643	6.64274	0.211325	0.901101	MOB1A	2	74152528	74178898	-1	MOB kinase activator 1A [Source:HGNC Symbol;Acc:HGNC:16015]
ENSG00000115053	0.742688	9.90663	0.171237	0.901101	NCL	2	231453531	231483641	-1	nucleolin [Source:HGNC Symbol;Acc:HGNC:7667]
ENSG00000115091	0.768576	7.13994	0.160927	0.901101	ACTR3	2	113890063	113962596	1	actin related protein 3 [Source:HGNC Symbol;Acc:HGNC:170]
ENSG00000115129	0.390226	6.20896	0.378204	0.901101	TP53I3	2	24077433	24085861	-1	tumor protein p53 inducible protein 3 [Source:HGNC Symbol;Acc:HGNC:19373]
ENSG00000115233	0.93474	6.62827	0.133736	0.901101	PSMD14	2	161308425	161411717	1	proteasome 26S subunit, non-ATPase 14 [Source:HGNC Symbol;Acc:HGNC:16889]
ENSG00000115255	-0.58757	8.25931	0.224628	0.901101	REEP6	19	1491166	1497927	1	receptor accessory protein 6 [Source:HGNC Symbol;Acc:HGNC:30078]
ENSG00000115268	-0.292047	10.584	0.475662	0.901101	RPS15	19	1438358	1440495	1	ribosomal protein S15 [Source:HGNC Symbol;Acc:HGNC:10388]
ENSG00000115306	0.549235	7.3071	0.289656	0.901101	SPTBN1	2	54456317	54671446	1	spectrin beta, non-erythrocytic 1 [Source:HGNC Symbol;Acc:HGNC:11275]
ENSG00000115415	0.784485	6.91126	0.183065	0.901101	STAT1	2	190908460	191020960	-1	signal transducer and activator of transcription 1 [Source:HGNC Symbol;Acc:HGNC:11362]
ENSG00000115457	-0.59201	9.15842	0.373586	0.901101	IGFBP2	2	216632828	216664436	1	insulin like growth factor binding protein 2 [Source:HGNC Symbol;Acc:HGNC:5471]
ENSG00000115484	0.429736	7.97122	0.263119	0.901101	CCT4	2	61868085	61888671	-1	chaperonin containing TCP1 subunit 4 [Source:HGNC Symbol;Acc:HGNC:1617]
ENSG00000115524	0.93659	7.8207	0.277509	0.901101	SF3B1	2	197388515	197435079	-1	splicing factor 3b subunit 1 [Source:HGNC Symbol;Acc:HGNC:10768]
ENSG00000115641	0.293115	7.6225	0.417978	0.901101	FHL2	2	105357712	105438513	-1	four and a half LIM domains 2 [Source:HGNC Symbol;Acc:HGNC:3703]
ENSG00000115677	0.311852	9.74057	0.393569	0.901101	HDLBP	2	241227264	241317061	-1	high density lipoprotein binding protein [Source:HGNC Symbol;Acc:HGNC:4857]
ENSG00000115738	0.539832	6.52044	0.280639	0.901101	ID2	2	8678845	8684461	1	inhibitor of DNA binding 2 [Source:HGNC Symbol;Acc:HGNC:5361]
ENSG00000115756	-0.519394	8.85588	0.230057	0.901101	HPCAL1	2	10302889	10427617	1	hippocalcin like 1 [Source:HGNC Symbol;Acc:HGNC:5145]
ENSG00000115758	0.401074	9.02615	0.195374	0.901101	ODC1	2	10439968	10448327	-1	ornithine decarboxylase 1 [Source:HGNC Symbol;Acc:HGNC:8109]
ENSG00000115762	0.606106	7.49971	0.195187	0.901101	PLEKHB2	2	131104847	131353709	1	pleckstrin homology domain containing B2 [Source:HGNC Symbol;Acc:HGNC:19236]
ENSG00000115806	0.499193	7.26342	0.159334	0.901101	GORASP2	2	170928464	170967130	1	golgi reassembly stacking protein 2 [Source:HGNC Symbol;Acc:HGNC:17500]
ENSG00000115875	0.644657	7.05546	0.127723	0.901101	SRSF7	2	38743599	38751494	-1	serine and arginine rich splicing factor 7 [Source:HGNC Symbol;Acc:HGNC:10789]
ENSG00000116251	0.678902	6.96353	0.161793	0.901101	RPL22	1	6185020	6209389	-1	ribosomal protein L22 [Source:HGNC Symbol;Acc:HGNC:10315]
ENSG00000116285	0.618379	10.2071	0.508016	0.901101	ERRFI1	1	8004404	8026309	-1	ERBB receptor feedback inhibitor 1 [Source:HGNC Symbol;Acc:HGNC:18185]
ENSG00000116288	0.44293	7.95865	0.189233	0.901101	PARK7	1	7954291	7985505	1	Parkinsonism associated deglycase [Source:HGNC Symbol;Acc:HGNC:16369]
ENSG00000116459	0.66012	7.18378	0.0783085	0.901101	ATP5PB	1	111448864	111462773	1	ATP synthase peripheral stalk-membrane subunit b [Source:HGNC Symbol;Acc:HGNC:840]
ENSG00000116478	0.407177	8.43329	0.213289	0.901101	HDAC1	1	32292083	32333635	1	histone deacetylase 1 [Source:HGNC Symbol;Acc:HGNC:4852]
ENSG00000116489	0.93962	6.85624	0.194484	0.901101	CAPZA1	1	112619805	112671616	1	capping actin protein of muscle Z-line subunit alpha 1 [Source:HGNC Symbol;Acc:HGNC:1488]
ENSG00000116661	-0.316788	8.85909	0.478571	0.901101	FBXO2	1	11637018	11655785	-1	F-box protein 2 [Source:HGNC Symbol;Acc:HGNC:13581]
ENSG00000116670	-0.468071	7.39825	0.325554	0.901101	MAD2L2	1	11674480	11691650	-1	mitotic arrest deficient 2 like 2 [Source:HGNC Symbol;Acc:HGNC:6764]
ENSG00000116685	-0.270708	8.43846	0.51333	0.901101	KIAA2013	1	11919591	11926428	-1	KIAA2013 [Source:HGNC Symbol;Acc:HGNC:28513]
ENSG00000116691	-0.409555	6.92837	0.297341	0.901101	MIIP	1	12019466	12032045	1	migration and invasion inhibitory protein [Source:HGNC Symbol;Acc:HGNC:25715]
ENSG00000116754	0.917704	7.03447	0.251966	0.901101	SRSF11	1	70205682	70253052	1	serine and arginine rich splicing factor 11 [Source:HGNC Symbol;Acc:HGNC:10782]
ENSG00000116786	-0.326406	7.39441	0.351661	0.901101	PLEKHM2	1	15684320	15734769	1	pleckstrin homology and RUN domain containing M2 [Source:HGNC Symbol;Acc:HGNC:29131]
ENSG00000116871	-0.38726	8.07407	0.314707	0.901101	MAP7D1	1	36155579	36180849	1	MAP7 domain containing 1 [Source:HGNC Symbol;Acc:HGNC:25514]
ENSG00000117318	-0.454867	7.65625	0.307748	0.901101	ID3	1	23557926	23559501	-1	inhibitor of DNA binding 3, HLH protein [Source:HGNC Symbol;Acc:HGNC:5362]
ENSG00000117395	0.341194	7.05728	0.363988	0.901101	EBNA1BP2	1	43164175	43270936	-1	EBNA1 binding protein 2 [Source:HGNC Symbol;Acc:HGNC:15531]
ENSG00000117399	-0.442539	8.14845	0.452001	0.901101	CDC20	1	43358981	43363203	1	cell division cycle 20 [Source:HGNC Symbol;Acc:HGNC:1723]
ENSG00000117411	-0.760991	8.48348	0.21479	0.901101	B4GALT2	1	43978943	43991170	1	beta-1,4-galactosyltransferase 2 [Source:HGNC Symbol;Acc:HGNC:925]
ENSG00000117450	0.675906	8.87933	0.0771445	0.901101	PRDX1	1	45510914	45542732	-1	peroxiredoxin 1 [Source:HGNC Symbol;Acc:HGNC:9352]
ENSG00000117519	0.75863	6.96087	0.190313	0.901101	CNN3	1	94896949	94927223	-1	calponin 3 [Source:HGNC Symbol;Acc:HGNC:2157]
ENSG00000117523	0.800964	7.28655	0.346204	0.901101	PRRC2C	1	171485551	171593511	1	proline rich coiled-coil 2C [Source:HGNC Symbol;Acc:HGNC:24903]
ENSG00000117592	0.312387	8.04935	0.353926	0.901101	PRDX6	1	173477330	173488815	1	peroxiredoxin 6 [Source:HGNC Symbol;Acc:HGNC:16753]
ENSG00000117632	0.266657	7.26076	0.470721	0.901101	STMN1	1	25884181	25906991	-1	stathmin 1 [Source:HGNC Symbol;Acc:HGNC:6510]
ENSG00000117868	0.462867	7.39615	0.401726	0.901101	ESYT2	7	158730995	158830253	-1	extended synaptotagmin 2 [Source:HGNC Symbol;Acc:HGNC:22211]
ENSG00000118046	-0.505747	8.89054	0.232034	0.901101	STK11	19	1177558	1228431	1	serine/threonine kinase 11 [Source:HGNC Symbol;Acc:HGNC:11389]
ENSG00000118217	0.744877	6.18126	0.343896	0.901101	ATF6	1	161766320	161964070	1	activating transcription factor 6 [Source:HGNC Symbol;Acc:HGNC:791]
ENSG00000118680	0.714784	7.90391	0.0879645	0.901101	MYL12B	18	3261479	3278461	1	myosin light chain 12B [Source:HGNC Symbol;Acc:HGNC:29827]
ENSG00000118705	0.476308	7.97887	0.278388	0.901101	RPN2	20	37178410	37241619	1	ribophorin II [Source:HGNC Symbol;Acc:HGNC:10382]
ENSG00000118816	0.300583	7.93962	0.430911	0.901101	CCNI	4	77047155	77076309	-1	cyclin I [Source:HGNC Symbol;Acc:HGNC:1595]
ENSG00000119318	0.559574	8.52246	0.272505	0.901101	RAD23B	9	107283137	107332192	1	RAD23 homolog B, nucleotide excision repair protein [Source:HGNC Symbol;Acc:HGNC:9813]
ENSG00000119333	-0.611851	8.14709	0.270895	0.901101	DYNC2I2	9	128633661	128656787	-1	dynein 2 intermediate chain 2 [Source:HGNC Symbol;Acc:HGNC:28296]
ENSG00000119335	0.51233	9.07387	0.30303	0.901101	SET	9	128683424	128696400	1	SET nuclear proto-oncogene [Source:HGNC Symbol;Acc:HGNC:10760]
ENSG00000119383	-0.258105	8.24617	0.414221	0.901101	PTPA	9	129110950	129148946	1	protein phosphatase 2 phosphatase activator [Source:HGNC Symbol;Acc:HGNC:9308]
ENSG00000119771	-0.457282	6.62197	0.390629	0.901101	KLHL29	2	23385179	23708611	1	kelch like family member 29 [Source:HGNC Symbol;Acc:HGNC:29404]
ENSG00000119777	-0.250926	6.92875	0.447501	0.901101	TMEM214	2	27032910	27041694	1	transmembrane protein 214 [Source:HGNC Symbol;Acc:HGNC:25983]
ENSG00000119888	0.672968	7.80267	0.17856	0.901101	EPCAM	2	47345158	47387601	1	epithelial cell adhesion molecule [Source:HGNC Symbol;Acc:HGNC:11529]
ENSG00000120254	0.275504	7.63725	0.439424	0.901101	MTHFD1L	6	150865679	151101887	1	methylenetetrahydrofolate dehydrogenase (NADP+ dependent) 1 like [Source:HGNC Symbol;Acc:HGNC:21055]
ENSG00000120438	0.492539	8.51531	0.173668	0.901101	TCP1	6	159778498	159789703	-1	t-complex 1 [Source:HGNC Symbol;Acc:HGNC:11655]
ENSG00000120705	0.841002	7.65185	0.136549	0.901101	ETF1	5	138506095	138543236	-1	eukaryotic translation termination factor 1 [Source:HGNC Symbol;Acc:HGNC:3477]
ENSG00000120733	0.455719	6.86882	0.409132	0.901101	KDM3B	5	138352685	138437028	1	lysine demethylase 3B [Source:HGNC Symbol;Acc:HGNC:1337]
ENSG00000120738	-0.255373	8.3929	0.463025	0.901101	EGR1	5	138465479	138469303	1	early growth response 1 [Source:HGNC Symbol;Acc:HGNC:3238]
ENSG00000120742	0.42679	7.42528	0.388299	0.901101	SERP1	3	150541998	150603228	-1	stress associated endoplasmic reticulum protein 1 [Source:HGNC Symbol;Acc:HGNC:10759]
ENSG00000120896	-0.710416	7.56851	0.117416	0.901101	SORBS3	8	22544986	22575788	1	sorbin and SH3 domain containing 3 [Source:HGNC Symbol;Acc:HGNC:30907]
ENSG00000121579	0.864833	7.44266	0.215784	0.901101	NAA50	3	113716458	113746300	-1	N-alpha-acetyltransferase 50, NatE catalytic subunit [Source:HGNC Symbol;Acc:HGNC:29533]
ENSG00000121774	0.413214	7.79081	0.268047	0.901101	KHDRBS1	1	32013868	32060850	1	KH RNA binding domain containing, signal transduction associated 1 [Source:HGNC Symbol;Acc:HGNC:18116]
ENSG00000121892	0.690903	6.83484	0.385771	0.901101	PDS5A	4	39822863	39977956	-1	PDS5 cohesin associated factor A [Source:HGNC Symbol;Acc:HGNC:29088]
ENSG00000122026	0.426654	9.25623	0.237666	0.901101	RPL21	13	27251309	27256691	1	ribosomal protein L21 [Source:HGNC Symbol;Acc:HGNC:10313]
ENSG00000122218	0.335347	8.34812	0.419173	0.901101	COPA	1	160288594	160343273	-1	COPI coat complex subunit alpha [Source:HGNC Symbol;Acc:HGNC:2230]
ENSG00000122359	-0.461934	9.1217	0.280428	0.901101	ANXA11	10	80150889	80205572	-1	annexin A11 [Source:HGNC Symbol;Acc:HGNC:535]
ENSG00000122406	0.372528	10.4294	0.296024	0.901101	RPL5	1	92832013	92841924	1	ribosomal protein L5 [Source:HGNC Symbol;Acc:HGNC:10360]
ENSG00000122490	-0.246907	7.27463	0.462913	0.901101	SLC66A2	18	79902420	79951657	-1	solute carrier family 66 member 2 [Source:HGNC Symbol;Acc:HGNC:26188]
ENSG00000122565	1.17533	7.05347	0.12032	0.901101	CBX3	7	26201162	26213607	1	chromobox 3 [Source:HGNC Symbol;Acc:HGNC:1553]
ENSG00000122566	0.848832	9.21603	0.134236	0.901101	HNRNPA2B1	7	26171151	26201529	-1	heterogeneous nuclear ribonucleoprotein A2/B1 [Source:HGNC Symbol;Acc:HGNC:5033]
ENSG00000122642	0.472002	6.91094	0.33196	0.901101	FKBP9	7	32957404	33006930	1	FKBP prolyl isomerase 9 [Source:HGNC Symbol;Acc:HGNC:3725]
ENSG00000122705	0.281746	7.25314	0.357082	0.901101	CLTA	9	36190856	36304781	1	clathrin light chain A [Source:HGNC Symbol;Acc:HGNC:2090]
ENSG00000123066	0.611248	7.12186	0.433644	0.901101	MED13L	12	115957905	116277693	-1	mediator complex subunit 13L [Source:HGNC Symbol;Acc:HGNC:22962]
ENSG00000123143	-0.662463	10.2788	0.210497	0.901101	PKN1	19	14433053	14471867	1	protein kinase N1 [Source:HGNC Symbol;Acc:HGNC:9405]
ENSG00000123159	-0.43896	8.70835	0.323861	0.901101	GIPC1	19	14477760	14496149	-1	GIPC PDZ domain containing family member 1 [Source:HGNC Symbol;Acc:HGNC:1226]
ENSG00000123562	0.746417	7.57717	0.166949	0.901101	MORF4L2	X	103675496	103688158	-1	mortality factor 4 like 2 [Source:HGNC Symbol;Acc:HGNC:16849]
ENSG00000123989	-0.472894	11.0495	0.286309	0.901101	CHPF	2	219538948	219543809	-1	chondroitin polymerizing factor [Source:HGNC Symbol;Acc:HGNC:24291]
ENSG00000124067	-0.244303	7.11127	0.448114	0.901101	SLC12A4	16	67943474	67969601	-1	solute carrier family 12 member 4 [Source:HGNC Symbol;Acc:HGNC:10913]
ENSG00000124145	0.380468	8.15124	0.422568	0.901101	SDC4	20	45325288	45348424	-1	syndecan 4 [Source:HGNC Symbol;Acc:HGNC:10661]
ENSG00000124191	-0.551737	6.83653	0.19259	0.901101	TOX2	20	43914852	44069616	1	TOX high mobility group box family member 2 [Source:HGNC Symbol;Acc:HGNC:16095]
ENSG00000124193	0.844062	7.24516	0.128109	0.901101	SRSF6	20	43457893	43466046	1	serine and arginine rich splicing factor 6 [Source:HGNC Symbol;Acc:HGNC:10788]
ENSG00000124207	1.02089	6.70715	0.247842	0.901101	CSE1L	20	49046246	49096960	1	chromosome segregation 1 like [Source:HGNC Symbol;Acc:HGNC:2431]
ENSG00000124214	0.460935	7.4302	0.223736	0.901101	STAU1	20	49113339	49188367	-1	staufen double-stranded RNA binding protein 1 [Source:HGNC Symbol;Acc:HGNC:11370]
ENSG00000124422	0.24477	8.1551	0.466022	0.901101	USP22	17	20999596	21043760	-1	ubiquitin specific peptidase 22 [Source:HGNC Symbol;Acc:HGNC:12621]
ENSG00000124571	0.338413	6.89182	0.453418	0.901101	XPO5	6	43522334	43576038	-1	exportin 5 [Source:HGNC Symbol;Acc:HGNC:17675]
ENSG00000124587	-0.512439	7.12381	0.156567	0.901101	PEX6	6	42963865	42979181	-1	peroxisomal biogenesis factor 6 [Source:HGNC Symbol;Acc:HGNC:8859]
ENSG00000124766	0.471821	7.26195	0.338719	0.901101	SOX4	6	21593751	21598619	1	SRY-box transcription factor 4 [Source:HGNC Symbol;Acc:HGNC:11200]
ENSG00000124767	0.654339	7.36353	0.19452	0.901101	GLO1	6	38675925	38703145	-1	glyoxalase I [Source:HGNC Symbol;Acc:HGNC:4323]
ENSG00000124783	0.617919	7.15707	0.286612	0.901101	SSR1	6	7268306	7347446	-1	signal sequence receptor subunit 1 [Source:HGNC Symbol;Acc:HGNC:11323]
ENSG00000124831	0.770888	6.48755	0.366644	0.901101	LRRFIP1	2	237627587	237813682	1	LRR binding FLII interacting protein 1 [Source:HGNC Symbol;Acc:HGNC:6702]
ENSG00000124882	1.07263	8.79127	0.17766	0.901101	EREG	4	74365145	74388749	1	epiregulin [Source:HGNC Symbol;Acc:HGNC:3443]
ENSG00000124920	-0.34894	7.16072	0.433195	0.901101	MYRF	11	61752636	61788518	1	myelin regulatory factor [Source:HGNC Symbol;Acc:HGNC:1181]
ENSG00000124942	0.546142	9.14971	0.446604	0.901101	AHNAK	11	62433542	62556235	-1	AHNAK nucleoprotein [Source:HGNC Symbol;Acc:HGNC:347]
ENSG00000125107	0.555676	7.54639	0.388446	0.901101	CNOT1	16	58519951	58629885	-1	CCR4-NOT transcription complex subunit 1 [Source:HGNC Symbol;Acc:HGNC:7877]
ENSG00000125166	0.229068	7.71412	0.514334	0.901101	GOT2	16	58707131	58734342	-1	glutamic-oxaloacetic transaminase 2 [Source:HGNC Symbol;Acc:HGNC:4433]
ENSG00000125304	0.817872	6.92857	0.145832	0.901101	TM9SF2	13	99446311	99564048	1	transmembrane 9 superfamily member 2 [Source:HGNC Symbol;Acc:HGNC:11865]
ENSG00000125378	0.469154	7.05562	0.390689	0.901101	BMP4	14	53949736	53958761	-1	bone morphogenetic protein 4 [Source:HGNC Symbol;Acc:HGNC:1071]
ENSG00000125505	-0.403149	8.54439	0.371937	0.901101	MBOAT7	19	54173412	54189882	-1	membrane bound O-acyltransferase domain containing 7 [Source:HGNC Symbol;Acc:HGNC:15505]
ENSG00000125520	-0.79223	8.33641	0.203925	0.901101	SLC2A4RG	20	63739776	63744050	1	SLC2A4 regulator [Source:HGNC Symbol;Acc:HGNC:15930]
ENSG00000125534	-0.647711	8.55483	0.242938	0.901101	PPDPF	20	63520765	63522206	1	pancreatic progenitor cell differentiation and proliferation factor [Source:HGNC Symbol;Acc:HGNC:16142]
ENSG00000125656	-0.349923	7.57721	0.513347	0.901101	CLPP	19	6361531	6370242	1	caseinolytic mitochondrial matrix peptidase proteolytic subunit [Source:HGNC Symbol;Acc:HGNC:2084]
ENSG00000125691	0.327539	9.35754	0.489007	0.901101	RPL23	17	38847860	38853764	-1	ribosomal protein L23 [Source:HGNC Symbol;Acc:HGNC:10316]
ENSG00000125731	-0.414628	7.87472	0.299792	0.901101	SH2D3A	19	6752160	6767463	-1	SH2 domain containing 3A [Source:HGNC Symbol;Acc:HGNC:16885]
ENSG00000125746	-0.378282	7.50201	0.433933	0.901101	EML2	19	45606994	45645602	-1	EMAP like 2 [Source:HGNC Symbol;Acc:HGNC:18035]
ENSG00000125753	-0.447467	8.20237	0.240194	0.901101	VASP	19	45506579	45526983	1	vasodilator stimulated phosphoprotein [Source:HGNC Symbol;Acc:HGNC:12652]
ENSG00000125755	-0.324483	8.50826	0.34371	0.901101	SYMPK	19	45815410	45863194	-1	symplekin [Source:HGNC Symbol;Acc:HGNC:22935]
ENSG00000125817	-0.372675	7.84415	0.381033	0.901101	CENPB	20	3783851	3786740	-1	centromere protein B [Source:HGNC Symbol;Acc:HGNC:1852]
ENSG00000125835	-0.384338	8.47349	0.426991	0.901101	SNRPB	20	2461634	2470853	-1	small nuclear ribonucleoprotein polypeptides B and B1 [Source:HGNC Symbol;Acc:HGNC:11153]
ENSG00000125868	0.621863	7.39839	0.0663889	0.901101	DSTN	20	17570075	17609919	1	destrin, actin depolymerizing factor [Source:HGNC Symbol;Acc:HGNC:15750]
ENSG00000125912	-0.331451	8.70434	0.410782	0.901101	NCLN	19	3185563	3209575	1	nicalin [Source:HGNC Symbol;Acc:HGNC:26923]
ENSG00000125944	0.841587	6.85377	0.180157	0.901101	HNRNPR	1	23303771	23344336	-1	heterogeneous nuclear ribonucleoprotein R [Source:HGNC Symbol;Acc:HGNC:5047]
ENSG00000125970	-0.271922	8.34627	0.449296	0.901101	RALY	20	33993646	34108308	1	RALY heterogeneous nuclear ribonucleoprotein [Source:HGNC Symbol;Acc:HGNC:15921]
ENSG00000125977	0.910006	7.41229	0.269451	0.901101	EIF2S2	20	34088309	34112243	-1	eukaryotic translation initiation factor 2 subunit beta [Source:HGNC Symbol;Acc:HGNC:3266]
ENSG00000126254	-0.454986	8.03782	0.374002	0.901101	RBM42	19	35629030	35637686	1	RNA binding motif protein 42 [Source:HGNC Symbol;Acc:HGNC:28117]
ENSG00000126368	-0.545733	7.38075	0.140527	0.901101	NR1D1	17	40092793	40100589	-1	nuclear receptor subfamily 1 group D member 1 [Source:HGNC Symbol;Acc:HGNC:7962]
ENSG00000126458	-0.734599	7.2793	0.091636	0.901101	RRAS	19	49635292	49640143	-1	RAS related [Source:HGNC Symbol;Acc:HGNC:10447]
ENSG00000126461	-1.08031	9.80094	0.126578	0.901101	SCAF1	19	49642209	49658642	1	SR-related CTD associated factor 1 [Source:HGNC Symbol;Acc:HGNC:30403]
ENSG00000126464	-0.315816	6.87796	0.363429	0.901101	PRR12	19	49591182	49626439	1	proline rich 12 [Source:HGNC Symbol;Acc:HGNC:29217]
ENSG00000126698	0.611502	6.78505	0.126647	0.901101	DNAJC8	1	28199456	28233029	-1	DnaJ heat shock protein family (Hsp40) member C8 [Source:HGNC Symbol;Acc:HGNC:15470]
ENSG00000126767	-0.381387	6.97493	0.295593	0.901101	ELK1	X	47635521	47650604	-1	ETS transcription factor ELK1 [Source:HGNC Symbol;Acc:HGNC:3321]
ENSG00000126934	-0.412905	9.02591	0.327771	0.901101	MAP2K2	19	4090321	4124122	-1	mitogen-activated protein kinase kinase 2 [Source:HGNC Symbol;Acc:HGNC:6842]
ENSG00000127022	0.772972	9.49046	0.211316	0.901101	CANX	5	179678628	179731641	1	calnexin [Source:HGNC Symbol;Acc:HGNC:1473]
ENSG00000127054	-0.307334	8.35034	0.349428	0.901101	INTS11	1	1311585	1324687	-1	integrator complex subunit 11 [Source:HGNC Symbol;Acc:HGNC:26052]
ENSG00000127184	0.261814	7.45796	0.485262	0.901101	COX7C	5	86617928	86620962	1	cytochrome c oxidase subunit 7C [Source:HGNC Symbol;Acc:HGNC:2292]
ENSG00000127418	-0.713007	8.43607	0.102281	0.901101	FGFRL1	4	1009936	1026898	1	fibroblast growth factor receptor like 1 [Source:HGNC Symbol;Acc:HGNC:3693]
ENSG00000127483	0.545567	7.00781	0.272675	0.901101	HP1BP3	1	20740266	20787323	-1	heterochromatin protein 1 binding protein 3 [Source:HGNC Symbol;Acc:HGNC:24973]
ENSG00000127528	-1.36537	8.49846	0.0660752	0.901101	KLF2	19	16324826	16328685	1	Kruppel like factor 2 [Source:HGNC Symbol;Acc:HGNC:6347]
ENSG00000127564	-0.770502	7.18198	0.257597	0.901101	PKMYT1	16	2968024	2980479	-1	protein kinase, membrane associated tyrosine/threonine 1 [Source:HGNC Symbol;Acc:HGNC:29650]
ENSG00000127585	-0.54974	7.75604	0.129284	0.901101	FBXL16	16	692498	705808	-1	F-box and leucine rich repeat protein 16 [Source:HGNC Symbol;Acc:HGNC:14150]
ENSG00000127586	-0.420474	7.29343	0.163245	0.901101	CHTF18	16	788046	800737	1	chromosome transmission fidelity factor 18 [Source:HGNC Symbol;Acc:HGNC:18435]
ENSG00000127603	0.727214	7.37681	0.383711	0.901101	MACF1	1	39081316	39487177	1	microtubule actin crosslinking factor 1 [Source:HGNC Symbol;Acc:HGNC:13664]
ENSG00000127666	-0.518169	7.19969	0.142499	0.901101	TICAM1	19	4815932	4831712	-1	toll like receptor adaptor molecule 1 [Source:HGNC Symbol;Acc:HGNC:18348]
ENSG00000127955	0.662651	6.66584	0.339811	0.901101	GNAI1	7	79768028	80226181	1	G protein subunit alpha i1 [Source:HGNC Symbol;Acc:HGNC:4384]
ENSG00000128011	-0.44143	7.25131	0.334694	0.901101	LRFN1	19	39306566	39320863	-1	leucine rich repeat and fibronectin type III domain containing 1 [Source:HGNC Symbol;Acc:HGNC:29290]
ENSG00000128016	-0.488228	7.46281	0.24496	0.901101	ZFP36	19	39406847	39409412	1	ZFP36 ring finger protein [Source:HGNC Symbol;Acc:HGNC:12862]
ENSG00000128050	0.850564	7.97271	0.108591	0.901101	PAICS	4	56435741	56464578	1	phosphoribosylaminoimidazole carboxylase and phosphoribosylaminoimidazolesuccinocarboxamide synthase [Source:HGNC Symbol;Acc:HGNC:8587]
ENSG00000128245	0.487632	6.94477	0.182511	0.901101	YWHAH	22	31944522	31957603	1	tyrosine 3-monooxygenase/tryptophan 5-monooxygenase activation protein eta [Source:HGNC Symbol;Acc:HGNC:12853]
ENSG00000128283	-0.697623	9.79888	0.173683	0.901101	CDC42EP1	22	37560480	37569405	1	CDC42 effector protein 1 [Source:HGNC Symbol;Acc:HGNC:17014]
ENSG00000128309	-0.696797	8.12622	0.256671	0.901101	MPST	22	37019635	37029822	1	mercaptopyruvate sulfurtransferase [Source:HGNC Symbol;Acc:HGNC:7223]
ENSG00000128340	-0.352133	6.99272	0.29796	0.901101	RAC2	22	37225270	37244448	-1	Rac family small GTPase 2 [Source:HGNC Symbol;Acc:HGNC:9802]
ENSG00000128510	0.985599	6.59502	0.108172	0.901101	CPA4	7	130293134	130324180	1	carboxypeptidase A4 [Source:HGNC Symbol;Acc:HGNC:15740]
ENSG00000128564	-0.95934	9.10626	0.180213	0.901101	VGF	7	101162509	101165569	-1	VGF nerve growth factor inducible [Source:HGNC Symbol;Acc:HGNC:12684]
ENSG00000128595	0.554587	7.4033	0.363532	0.901101	CALU	7	128739292	128773400	1	calumenin [Source:HGNC Symbol;Acc:HGNC:1458]
ENSG00000128928	0.44607	6.7936	0.308923	0.901101	IVD	15	40405485	40435947	1	isovaleryl-CoA dehydrogenase [Source:HGNC Symbol;Acc:HGNC:6186]
ENSG00000128989	0.999376	6.83177	0.139603	0.901101	ARPP19	15	52547045	52569883	-1	cAMP regulated phosphoprotein 19 [Source:HGNC Symbol;Acc:HGNC:16967]
ENSG00000129116	0.26835	7.32556	0.479898	0.901101	PALLD	4	168497052	168928457	1	palladin, cytoskeletal associated protein [Source:HGNC Symbol;Acc:HGNC:17068]
ENSG00000129353	-0.229906	7.02787	0.515278	0.901101	SLC44A2	19	10602457	10644557	1	solute carrier family 44 member 2 [Source:HGNC Symbol;Acc:HGNC:17292]
ENSG00000129354	-0.268743	7.77403	0.432533	0.901101	AP1M2	19	10572671	10587315	-1	adaptor related protein complex 1 subunit mu 2 [Source:HGNC Symbol;Acc:HGNC:558]
ENSG00000129667	-0.259677	7.11583	0.395631	0.901101	RHBDF2	17	76470891	76501790	-1	rhomboid 5 homolog 2 [Source:HGNC Symbol;Acc:HGNC:20788]
ENSG00000129911	-1.07559	8.08586	0.159182	0.901101	KLF16	19	1852399	1863579	-1	Kruppel like factor 16 [Source:HGNC Symbol;Acc:HGNC:16857]
ENSG00000129925	-0.645882	7.65528	0.13541	0.901101	PGAP6	16	370788	387113	-1	post-glycosylphosphatidylinositol attachment to proteins 6 [Source:HGNC Symbol;Acc:HGNC:17205]
ENSG00000129932	-0.376084	6.83973	0.503847	0.901101	DOHH	19	3490821	3500674	-1	deoxyhypusine hydroxylase [Source:HGNC Symbol;Acc:HGNC:28662]
ENSG00000129968	-0.762082	8.45292	0.236419	0.901101	ABHD17A	19	1876810	1885496	-1	abhydrolase domain containing 17A, depalmitoylase [Source:HGNC Symbol;Acc:HGNC:28756]
ENSG00000130005	-0.45393	8.12492	0.436625	0.901101	GAMT	19	1397026	1401570	-1	guanidinoacetate N-methyltransferase [Source:HGNC Symbol;Acc:HGNC:4136]
ENSG00000130066	0.435609	9.31929	0.486597	0.901101	SAT1	X	23783173	23786226	1	spermidine/spermine N1-acetyltransferase 1 [Source:HGNC Symbol;Acc:HGNC:10540]
ENSG00000130158	-0.348361	7.55053	0.348557	0.901101	DOCK6	19	11199295	11262524	-1	dedicator of cytokinesis 6 [Source:HGNC Symbol;Acc:HGNC:19189]
ENSG00000130175	-0.319515	9.44357	0.32837	0.901101	PRKCSH	19	11435284	11450968	1	protein kinase C substrate 80K-H [Source:HGNC Symbol;Acc:HGNC:9411]
ENSG00000130202	-0.469464	8.19211	0.17396	0.901101	NECTIN2	19	44846175	44889223	1	nectin cell adhesion molecule 2 [Source:HGNC Symbol;Acc:HGNC:9707]
ENSG00000130254	0.371591	6.98819	0.414592	0.901101	SAFB2	19	5586999	5624046	-1	scaffold attachment factor B2 [Source:HGNC Symbol;Acc:HGNC:21605]
ENSG00000130255	-0.291832	9.21158	0.374227	0.901101	RPL36	19	5674947	5691875	1	ribosomal protein L36 [Source:HGNC Symbol;Acc:HGNC:13631]
ENSG00000130299	-0.259493	6.85003	0.438789	0.901101	GTPBP3	19	17334920	17342731	1	GTP binding protein 3, mitochondrial [Source:HGNC Symbol;Acc:HGNC:14880]
ENSG00000130305	-0.315092	7.37962	0.424048	0.901101	NSUN5	7	73302516	73308826	-1	NOP2/Sun RNA methyltransferase 5 [Source:HGNC Symbol;Acc:HGNC:16385]
ENSG00000130382	-0.200804	7.54205	0.503671	0.901101	MLLT1	19	6210381	6279975	-1	MLLT1 super elongation complex subunit [Source:HGNC Symbol;Acc:HGNC:7134]
ENSG00000130414	0.26947	6.99688	0.440468	0.901101	NDUFA10	2	239892450	240025743	-1	NADH:ubiquinone oxidoreductase subunit A10 [Source:HGNC Symbol;Acc:HGNC:7684]
ENSG00000130475	-0.656111	7.05334	0.258077	0.901101	FCHO1	19	17747718	17788568	1	FCH and mu domain containing endocytic adaptor 1 [Source:HGNC Symbol;Acc:HGNC:29002]
ENSG00000130479	-1.0872	8.66068	0.156126	0.901101	MAP1S	19	17719242	17734513	1	microtubule associated protein 1S [Source:HGNC Symbol;Acc:HGNC:15715]
ENSG00000130511	-0.547935	8.21761	0.197216	0.901101	SSBP4	19	18418864	18434562	1	single stranded DNA binding protein 4 [Source:HGNC Symbol;Acc:HGNC:15676]
ENSG00000130522	-0.570218	10.0521	0.316299	0.901101	JUND	19	18279694	18281622	-1	JunD proto-oncogene, AP-1 transcription factor subunit [Source:HGNC Symbol;Acc:HGNC:6206]
ENSG00000130589	-0.522027	7.98336	0.162921	0.901101	HELZ2	20	63558086	63574239	-1	helicase with zinc finger 2 [Source:HGNC Symbol;Acc:HGNC:30021]
ENSG00000130669	-0.952894	8.9204	0.106012	0.901101	PAK4	19	39125770	39182816	1	p21 (RAC1) activated kinase 4 [Source:HGNC Symbol;Acc:HGNC:16059]
ENSG00000130706	-0.421379	8.08394	0.371042	0.901101	ADRM1	20	62302093	62308862	1	adhesion regulating molecule 1 [Source:HGNC Symbol;Acc:HGNC:15759]
ENSG00000130720	-0.597079	6.76543	0.0989223	0.901101	FIBCD1	9	130902438	130939286	-1	fibrinogen C domain containing 1 [Source:HGNC Symbol;Acc:HGNC:25922]
ENSG00000130726	-0.480955	11.3596	0.382568	0.901101	TRIM28	19	58544064	58550722	1	tripartite motif containing 28 [Source:HGNC Symbol;Acc:HGNC:16384]
ENSG00000130733	-0.380447	6.93858	0.333079	0.901101	YIPF2	19	10922185	10928681	-1	Yip1 domain family member 2 [Source:HGNC Symbol;Acc:HGNC:28476]
ENSG00000130741	0.703327	7.85275	0.185676	0.901101	EIF2S3	X	24054946	24078810	1	eukaryotic translation initiation factor 2 subunit gamma [Source:HGNC Symbol;Acc:HGNC:3267]
ENSG00000130762	-0.488633	6.9219	0.185124	0.901101	ARHGEF16	1	3454665	3481113	1	Rho guanine nucleotide exchange factor 16 [Source:HGNC Symbol;Acc:HGNC:15515]
ENSG00000130811	-0.329866	8.71073	0.401069	0.901101	EIF3G	19	10115014	10119918	-1	eukaryotic translation initiation factor 3 subunit G [Source:HGNC Symbol;Acc:HGNC:3274]
ENSG00000130821	-0.526235	8.5732	0.325417	0.901101	SLC6A8	X	153687926	153696588	1	solute carrier family 6 member 8 [Source:HGNC Symbol;Acc:HGNC:11055]
ENSG00000130826	0.594142	7.26649	0.171367	0.901101	DKC1	X	154762742	154777689	1	dyskerin pseudouridine synthase 1 [Source:HGNC Symbol;Acc:HGNC:2890]
ENSG00000130881	-0.734276	7.93118	0.296156	0.901101	LRP3	19	33177603	33208864	1	LDL receptor related protein 3 [Source:HGNC Symbol;Acc:HGNC:6695]
ENSG00000131016	0.570329	11.402	0.488442	0.901101	AKAP12	6	151239967	151358559	1	A-kinase anchoring protein 12 [Source:HGNC Symbol;Acc:HGNC:370]
ENSG00000131037	-0.405254	6.82271	0.275215	0.901101	EPS8L1	19	55072020	55087923	1	EPS8 like 1 [Source:HGNC Symbol;Acc:HGNC:21295]
ENSG00000131051	0.859576	7.07264	0.365651	0.901101	RBM39	20	35701347	35742312	-1	RNA binding motif protein 39 [Source:HGNC Symbol;Acc:HGNC:15923]
ENSG00000131100	0.573316	6.56964	0.227892	0.901101	ATP6V1E1	22	17592136	17628749	-1	ATPase H+ transporting V1 subunit E1 [Source:HGNC Symbol;Acc:HGNC:857]
ENSG00000131165	-0.323257	8.62725	0.379034	0.901101	CHMP1A	16	89640816	89657738	-1	charged multivesicular body protein 1A [Source:HGNC Symbol;Acc:HGNC:8740]
ENSG00000131188	-0.808557	8.09491	0.256157	0.901101	PRR7	5	177446445	177456286	1	proline rich 7, synaptic [Source:HGNC Symbol;Acc:HGNC:28130]
ENSG00000131236	0.479131	8.0686	0.224895	0.901101	CAP1	1	40040233	40072649	1	cyclase associated actin cytoskeleton regulatory protein 1 [Source:HGNC Symbol;Acc:HGNC:20040]
ENSG00000131462	-0.353331	7.25052	0.379923	0.901101	TUBG1	17	42609683	42615238	1	tubulin gamma 1 [Source:HGNC Symbol;Acc:HGNC:12417]
ENSG00000131467	0.355615	7.78914	0.241032	0.901101	PSME3	17	42824385	42843760	1	proteasome activator subunit 3 [Source:HGNC Symbol;Acc:HGNC:9570]
ENSG00000131504	0.223773	7.99854	0.502762	0.901101	DIAPH1	5	141515016	141619055	-1	diaphanous related formin 1 [Source:HGNC Symbol;Acc:HGNC:2876]
ENSG00000131620	0.630118	6.82028	0.156047	0.901101	ANO1	11	70078302	70189528	1	anoctamin 1 [Source:HGNC Symbol;Acc:HGNC:21625]
ENSG00000131650	-0.593818	6.58175	0.208476	0.901101	KREMEN2	16	2964216	2968383	1	kringle containing transmembrane protein 2 [Source:HGNC Symbol;Acc:HGNC:18797]
ENSG00000131653	-0.396043	8.7524	0.265429	0.901101	TRAF7	16	2155698	2178129	1	TNF receptor associated factor 7 [Source:HGNC Symbol;Acc:HGNC:20456]
ENSG00000131669	-0.284648	6.82468	0.484646	0.901101	NINJ1	9	93121496	93134251	-1	ninjurin 1 [Source:HGNC Symbol;Acc:HGNC:7824]
ENSG00000131899	-0.333246	7.31361	0.321545	0.901101	LLGL1	17	18225635	18244875	1	LLGL scribble cell polarity complex component 1 [Source:HGNC Symbol;Acc:HGNC:6628]
ENSG00000132002	0.253657	8.00556	0.437286	0.901101	DNAJB1	19	14514769	14560391	-1	DnaJ heat shock protein family (Hsp40) member B1 [Source:HGNC Symbol;Acc:HGNC:5270]
ENSG00000132024	-0.294451	7.09895	0.338506	0.901101	CC2D1A	19	13906201	13930879	1	coiled-coil and C2 domain containing 1A [Source:HGNC Symbol;Acc:HGNC:30237]
ENSG00000132305	0.378373	7.19933	0.288104	0.901101	IMMT	2	86143932	86195472	-1	inner membrane mitochondrial protein [Source:HGNC Symbol;Acc:HGNC:6047]
ENSG00000132341	0.528519	9.11113	0.127549	0.901101	RAN	12	130872037	130877678	1	RAN, member RAS oncogene family [Source:HGNC Symbol;Acc:HGNC:9846]
ENSG00000132361	-0.330689	9.48054	0.432601	0.901101	CLUH	17	2689386	2712663	-1	clustered mitochondria homolog [Source:HGNC Symbol;Acc:HGNC:29094]
ENSG00000132382	-0.251487	8.64591	0.414787	0.901101	MYBBP1A	17	4538897	4555386	-1	MYB binding protein 1a [Source:HGNC Symbol;Acc:HGNC:7546]
ENSG00000132383	0.454296	7.40991	0.240708	0.901101	RPA1	17	1829702	1900082	1	replication protein A1 [Source:HGNC Symbol;Acc:HGNC:10289]
ENSG00000132463	0.693547	7.55847	0.172501	0.901101	GRSF1	4	70815783	70839897	-1	G-rich RNA sequence binding factor 1 [Source:HGNC Symbol;Acc:HGNC:4610]
ENSG00000132470	-0.465254	11.855	0.188175	0.901101	ITGB4	17	75721328	75757818	1	integrin subunit beta 4 [Source:HGNC Symbol;Acc:HGNC:6158]
ENSG00000132471	-0.451545	8.42484	0.172966	0.901101	WBP2	17	75845699	75856507	-1	WW domain binding protein 2 [Source:HGNC Symbol;Acc:HGNC:12738]
ENSG00000132475	0.449602	10.2137	0.329769	0.901101	H3-3B	17	75776434	75785893	-1	H3.3 histone B [Source:HGNC Symbol;Acc:HGNC:4765]
ENSG00000132481	-0.521302	6.91726	0.172533	0.901101	TRIM47	17	75874164	75878581	-1	tripartite motif containing 47 [Source:HGNC Symbol;Acc:HGNC:19020]
ENSG00000132646	0.731702	7.64083	0.121983	0.901101	PCNA	20	5114953	5126626	-1	proliferating cell nuclear antigen [Source:HGNC Symbol;Acc:HGNC:8729]
ENSG00000132676	0.440516	7.21657	0.223574	0.901101	DAP3	1	155687960	155739010	1	death associated protein 3 [Source:HGNC Symbol;Acc:HGNC:2673]
ENSG00000132698	-0.243579	7.2908	0.474198	0.901101	RAB25	1	156061160	156070504	1	RAB25, member RAS oncogene family [Source:HGNC Symbol;Acc:HGNC:18238]
ENSG00000132963	0.740171	6.63918	0.0933	0.901101	POMP	13	28659104	28678959	1	proteasome maturation protein [Source:HGNC Symbol;Acc:HGNC:20330]
ENSG00000133112	0.586744	9.69268	0.232213	0.901101	TPT1	13	45333471	45341284	-1	tumor protein, translationally-controlled 1 [Source:HGNC Symbol;Acc:HGNC:12022]
ENSG00000133226	0.311542	6.98725	0.486619	0.901101	SRRM1	1	24631716	24673281	1	serine and arginine repetitive matrix 1 [Source:HGNC Symbol;Acc:HGNC:16638]
ENSG00000133243	-0.535293	8.65405	0.2781	0.901101	BTBD2	19	1985438	2034881	-1	BTB domain containing 2 [Source:HGNC Symbol;Acc:HGNC:15504]
ENSG00000133265	-0.47962	7.24456	0.426703	0.901101	HSPBP1	19	55262223	55280381	-1	HSPA (Hsp70) binding protein 1 [Source:HGNC Symbol;Acc:HGNC:24989]
ENSG00000133275	-0.220841	8.44921	0.508616	0.901101	CSNK1G2	19	1941172	1981338	1	casein kinase 1 gamma 2 [Source:HGNC Symbol;Acc:HGNC:2455]
ENSG00000133315	-0.66187	7.73421	0.111075	0.901101	MACROD1	11	63998558	64166113	-1	mono-ADP ribosylhydrolase 1 [Source:HGNC Symbol;Acc:HGNC:29598]
ENSG00000133318	0.287689	7.34535	0.459073	0.901101	RTN3	11	63681446	63759891	1	reticulon 3 [Source:HGNC Symbol;Acc:HGNC:10469]
ENSG00000133606	0.460653	6.94705	0.250337	0.901101	MKRN1	7	140453033	140479536	-1	makorin ring finger protein 1 [Source:HGNC Symbol;Acc:HGNC:7112]
ENSG00000133612	-0.245302	7.97072	0.43092	0.901101	AGAP3	7	151085831	151144436	1	ArfGAP with GTPase domain, ankyrin repeat and PH domain 3 [Source:HGNC Symbol;Acc:HGNC:16923]
ENSG00000133706	0.583768	7.44783	0.4335	0.901101	LARS1	5	146110566	146182696	-1	leucyl-tRNA synthetase 1 [Source:HGNC Symbol;Acc:HGNC:6512]
ENSG00000133895	-0.286007	7.82952	0.433439	0.901101	MEN1	11	64803510	64811294	-1	menin 1 [Source:HGNC Symbol;Acc:HGNC:7010]
ENSG00000134001	0.743239	6.91494	0.147799	0.901101	EIF2S1	14	67360328	67386516	1	eukaryotic translation initiation factor 2 subunit alpha [Source:HGNC Symbol;Acc:HGNC:3265]
ENSG00000134294	0.886624	9.17699	0.296245	0.901101	SLC38A2	12	46358188	46372773	-1	solute carrier family 38 member 2 [Source:HGNC Symbol;Acc:HGNC:13448]
ENSG00000134308	0.578687	8.39632	0.135151	0.901101	YWHAQ	2	9583967	9630997	-1	tyrosine 3-monooxygenase/tryptophan 5-monooxygenase activation protein theta [Source:HGNC Symbol;Acc:HGNC:12854]
ENSG00000134333	0.637927	9.52387	0.242274	0.901101	LDHA	11	18394560	18408425	1	lactate dehydrogenase A [Source:HGNC Symbol;Acc:HGNC:6535]
ENSG00000134440	1.00205	7.27522	0.26686	0.901101	NARS1	18	57600656	57622213	-1	asparaginyl-tRNA synthetase 1 [Source:HGNC Symbol;Acc:HGNC:7643]
ENSG00000134590	-0.424185	7.40329	0.326295	0.901101	RTL8C	X	135032355	135033546	1	retrotransposon Gag like 8C [Source:HGNC Symbol;Acc:HGNC:2569]
ENSG00000134686	-0.280419	8.4662	0.379658	0.901101	PHC2	1	33323623	33431052	-1	polyhomeotic homolog 2 [Source:HGNC Symbol;Acc:HGNC:3183]
ENSG00000134884	0.87304	6.80312	0.317318	0.901101	ARGLU1	13	106541673	106568137	-1	arginine and glutamate rich 1 [Source:HGNC Symbol;Acc:HGNC:25482]
ENSG00000134910	0.374051	7.64434	0.369446	0.901101	STT3A	11	125591712	125625215	1	STT3 oligosaccharyltransferase complex catalytic subunit A [Source:HGNC Symbol;Acc:HGNC:6172]
ENSG00000135018	0.688172	7.11695	0.229519	0.901101	UBQLN1	9	83659968	83707958	-1	ubiquilin 1 [Source:HGNC Symbol;Acc:HGNC:12508]
ENSG00000135046	1.13118	8.66965	0.187453	0.901101	ANXA1	9	73151865	73170393	1	annexin A1 [Source:HGNC Symbol;Acc:HGNC:533]
ENSG00000135052	0.690488	6.8308	0.228082	0.901101	GOLM1	9	86026146	86100173	-1	golgi membrane protein 1 [Source:HGNC Symbol;Acc:HGNC:15451]
ENSG00000135069	0.664485	8.11514	0.38124	0.901101	PSAT1	9	78297125	78330093	1	phosphoserine aminotransferase 1 [Source:HGNC Symbol;Acc:HGNC:19129]
ENSG00000135269	0.827091	6.74836	0.209355	0.901101	TES	7	116210506	116258783	1	testin LIM domain protein [Source:HGNC Symbol;Acc:HGNC:14620]
ENSG00000135316	1.00358	7.4139	0.0686156	0.901101	SYNCRIP	6	85607779	85644063	-1	synaptotagmin binding cytoplasmic RNA interacting protein [Source:HGNC Symbol;Acc:HGNC:16918]
ENSG00000135318	0.777769	6.97932	0.324874	0.901101	NT5E	6	85449584	85495791	1	5'-nucleotidase ecto [Source:HGNC Symbol;Acc:HGNC:8021]
ENSG00000135372	0.261594	7.58614	0.408733	0.901101	NAT10	11	34105617	34147670	1	N-acetyltransferase 10 [Source:HGNC Symbol;Acc:HGNC:29830]
ENSG00000135387	0.635549	8.10265	0.180597	0.901101	CAPRIN1	11	34051731	34102610	1	cell cycle associated protein 1 [Source:HGNC Symbol;Acc:HGNC:6743]
ENSG00000135390	-0.467296	7.37828	0.199012	0.901101	ATP5MC2	12	53632726	53677408	-1	ATP synthase membrane subunit c locus 2 [Source:HGNC Symbol;Acc:HGNC:842]
ENSG00000135486	0.305778	10.2974	0.466164	0.901101	HNRNPA1	12	54280193	54287088	1	heterogeneous nuclear ribonucleoprotein A1 [Source:HGNC Symbol;Acc:HGNC:5031]
ENSG00000135519	-0.835024	8.13671	0.0306946	0.901101	KCNH3	12	49539030	49558337	1	potassium voltage-gated channel subfamily H member 3 [Source:HGNC Symbol;Acc:HGNC:6252]
ENSG00000135535	0.966615	6.8526	0.205266	0.901101	CD164	6	109366514	109382467	-1	CD164 molecule [Source:HGNC Symbol;Acc:HGNC:1632]
ENSG00000135679	1.41784	6.66167	0.0649231	0.901101	MDM2	12	68808177	68850686	1	MDM2 proto-oncogene [Source:HGNC Symbol;Acc:HGNC:6973]
ENSG00000135829	0.872313	7.28946	0.0881946	0.901101	DHX9	1	182839347	182887982	1	DExH-box helicase 9 [Source:HGNC Symbol;Acc:HGNC:2750]
ENSG00000135862	0.416004	7.2778	0.494007	0.901101	LAMC1	1	183023420	183145592	1	laminin subunit gamma 1 [Source:HGNC Symbol;Acc:HGNC:6492]
ENSG00000135916	-0.242003	8.69909	0.459535	0.901101	ITM2C	2	230864639	230879248	1	integral membrane protein 2C [Source:HGNC Symbol;Acc:HGNC:6175]
ENSG00000135919	0.383016	7.61684	0.467051	0.901101	SERPINE2	2	223975045	224039318	-1	serpin family E member 2 [Source:HGNC Symbol;Acc:HGNC:8951]
ENSG00000136003	0.463111	7.18733	0.231524	0.901101	ISCU	12	108562582	108569368	1	iron-sulfur cluster assembly enzyme [Source:HGNC Symbol;Acc:HGNC:29882]
ENSG00000136156	0.480178	6.97832	0.188552	0.901101	ITM2B	13	48232612	48270357	1	integral membrane protein 2B [Source:HGNC Symbol;Acc:HGNC:6174]
ENSG00000136193	0.482267	7.24243	0.400789	0.901101	SCRN1	7	29920104	29990289	-1	secernin 1 [Source:HGNC Symbol;Acc:HGNC:22192]
ENSG00000136238	0.261371	8.43322	0.383249	0.901101	RAC1	7	6374527	6403967	1	Rac family small GTPase 1 [Source:HGNC Symbol;Acc:HGNC:9801]
ENSG00000136240	0.416429	7.12537	0.234685	0.901101	KDELR2	7	6445953	6484190	-1	KDEL endoplasmic reticulum protein retention receptor 2 [Source:HGNC Symbol;Acc:HGNC:6305]
ENSG00000136270	-0.266791	7.55152	0.456463	0.901101	TBRG4	7	45100100	45112047	-1	transforming growth factor beta regulator 4 [Source:HGNC Symbol;Acc:HGNC:17443]
ENSG00000136295	-0.328784	8.11884	0.371563	0.901101	TTYH3	7	2631986	2664802	1	tweety family member 3 [Source:HGNC Symbol;Acc:HGNC:22222]
ENSG00000136378	-0.354019	7.08683	0.278713	0.901101	ADAMTS7	15	78759206	78811464	-1	ADAM metallopeptidase with thrombospondin type 1 motif 7 [Source:HGNC Symbol;Acc:HGNC:223]
ENSG00000136436	0.475721	6.50038	0.483352	0.901101	CALCOCO2	17	48831018	48866522	1	calcium binding and coiled-coil domain 2 [Source:HGNC Symbol;Acc:HGNC:29912]
ENSG00000136527	0.623369	7.51242	0.210477	0.901101	TRA2B	3	185914558	185938103	-1	transformer 2 beta homolog [Source:HGNC Symbol;Acc:HGNC:10781]
ENSG00000136628	0.758159	7.53821	0.286109	0.901101	EPRS1	1	219968600	220046530	-1	glutamyl-prolyl-tRNA synthetase 1 [Source:HGNC Symbol;Acc:HGNC:3418]
ENSG00000136758	0.797704	7.29983	0.236925	0.901101	YME1L1	10	27110111	27155266	-1	YME1 like 1 ATPase [Source:HGNC Symbol;Acc:HGNC:12843]
ENSG00000136810	0.566293	7.55798	0.112105	0.901101	TXN	9	110243810	110256507	-1	thioredoxin [Source:HGNC Symbol;Acc:HGNC:12435]
ENSG00000136813	0.684833	6.58258	0.295277	0.901101	ECPAS	9	111360692	111484745	-1	Ecm29 proteasome adaptor and scaffold [Source:HGNC Symbol;Acc:HGNC:29020]
ENSG00000136840	-0.353998	7.40944	0.428329	0.901101	ST6GALNAC4	9	127907886	127917041	-1	ST6 N-acetylgalactosaminide alpha-2,6-sialyltransferase 4 [Source:HGNC Symbol;Acc:HGNC:17846]
ENSG00000136877	-0.373331	7.38341	0.406398	0.901101	FPGS	9	127794597	127814327	1	folylpolyglutamate synthase [Source:HGNC Symbol;Acc:HGNC:3824]
ENSG00000136930	0.267884	7.45657	0.40718	0.901101	PSMB7	9	124353465	124415444	-1	proteasome 20S subunit beta 7 [Source:HGNC Symbol;Acc:HGNC:9544]
ENSG00000136938	0.414013	7.50943	0.248239	0.901101	ANP32B	9	97983341	98015943	1	acidic nuclear phosphoprotein 32 family member B [Source:HGNC Symbol;Acc:HGNC:16677]
ENSG00000136997	0.204306	9.51241	0.512025	0.901101	MYC	8	127735434	127742951	1	MYC proto-oncogene, bHLH transcription factor [Source:HGNC Symbol;Acc:HGNC:7553]
ENSG00000137124	0.272154	6.95405	0.480902	0.901101	ALDH1B1	9	38392702	38398661	1	aldehyde dehydrogenase 1 family member B1 [Source:HGNC Symbol;Acc:HGNC:407]
ENSG00000137154	0.261286	10.9727	0.495426	0.901101	RPS6	9	19375715	19380236	-1	ribosomal protein S6 [Source:HGNC Symbol;Acc:HGNC:10429]
ENSG00000137161	-0.267551	7.0181	0.418694	0.901101	CNPY3	6	42929192	42939294	1	canopy FGF signaling regulator 3 [Source:HGNC Symbol;Acc:HGNC:11968]
ENSG00000137166	-0.554062	7.89299	0.156763	0.901101	FOXP4	6	41546426	41602384	1	forkhead box P4 [Source:HGNC Symbol;Acc:HGNC:20842]
ENSG00000137309	-0.633516	12.9338	0.141517	0.901101	HMGA1	6	34236873	34246231	1	high mobility group AT-hook 1 [Source:HGNC Symbol;Acc:HGNC:5010]
ENSG00000137312	-0.330239	7.52023	0.337041	0.901101	FLOT1	6	30727709	30742732	-1	flotillin 1 [Source:HGNC Symbol;Acc:HGNC:3757]
ENSG00000137693	0.492584	6.93698	0.379004	0.901101	YAP1	11	102110447	102233424	1	Yes1 associated transcriptional regulator [Source:HGNC Symbol;Acc:HGNC:16262]
ENSG00000137876	0.539603	7.16813	0.201289	0.901101	RSL24D1	15	55180806	55197049	-1	ribosomal L24 domain containing 1 [Source:HGNC Symbol;Acc:HGNC:18479]
ENSG00000137962	0.821441	7.71606	0.394685	0.901101	ARHGAP29	1	94148988	94275068	-1	Rho GTPase activating protein 29 [Source:HGNC Symbol;Acc:HGNC:30207]
ENSG00000138069	0.802954	7.31238	0.168304	0.901101	RAB1A	2	65070696	65130331	-1	RAB1A, member RAS oncogene family [Source:HGNC Symbol;Acc:HGNC:9758]
ENSG00000138071	0.811627	7.8654	0.183044	0.901101	ACTR2	2	65227788	65271253	1	actin related protein 2 [Source:HGNC Symbol;Acc:HGNC:169]
ENSG00000138095	0.997091	7.85272	0.207771	0.901101	LRPPRC	2	43886224	43995989	-1	leucine rich pentatricopeptide repeat containing [Source:HGNC Symbol;Acc:HGNC:15714]
ENSG00000138119	0.65583	8.79862	0.348427	0.901101	MYOF	10	93306429	93482334	-1	myoferlin [Source:HGNC Symbol;Acc:HGNC:3656]
ENSG00000138326	0.613424	9.09728	0.341247	0.901101	RPS24	10	78033760	78056813	1	ribosomal protein S24 [Source:HGNC Symbol;Acc:HGNC:10411]
ENSG00000138413	0.97625	6.56949	0.163852	0.901101	IDH1	2	208236229	208266074	-1	isocitrate dehydrogenase (NADP(+)) 1 [Source:HGNC Symbol;Acc:HGNC:5382]
ENSG00000138430	0.623258	7.50217	0.170462	0.901101	OLA1	2	174072447	174248599	-1	Obg like ATPase 1 [Source:HGNC Symbol;Acc:HGNC:28833]
ENSG00000138434	0.678997	9.4127	0.418103	0.901101	ITPRID2	2	181891730	181930738	1	ITPR interacting domain containing 2 [Source:HGNC Symbol;Acc:HGNC:11319]
ENSG00000138668	0.312128	8.62198	0.365046	0.901101	HNRNPD	4	82352498	82374503	-1	heterogeneous nuclear ribonucleoprotein D [Source:HGNC Symbol;Acc:HGNC:5036]
ENSG00000138757	0.850889	7.26406	0.162129	0.901101	G3BP2	4	75641849	75724589	-1	G3BP stress granule assembly factor 2 [Source:HGNC Symbol;Acc:HGNC:30291]
ENSG00000138768	0.661447	6.54952	0.414421	0.901101	USO1	4	75724577	75814286	1	USO1 vesicle transport factor [Source:HGNC Symbol;Acc:HGNC:30904]
ENSG00000138772	0.816609	7.47528	0.171866	0.901101	ANXA3	4	78551747	78610451	1	annexin A3 [Source:HGNC Symbol;Acc:HGNC:541]
ENSG00000138814	0.535137	7.66787	0.40368	0.901101	PPP3CA	4	101023409	101348278	-1	protein phosphatase 3 catalytic subunit alpha [Source:HGNC Symbol;Acc:HGNC:9314]
ENSG00000139146	0.729001	6.99361	0.18044	0.901101	SINHCAF	12	31280584	31327058	-1	SIN3-HDAC complex associated factor [Source:HGNC Symbol;Acc:HGNC:30702]
ENSG00000139289	0.389401	9.00226	0.434459	0.901101	PHLDA1	12	76025447	76033932	-1	pleckstrin homology like domain family A member 1 [Source:HGNC Symbol;Acc:HGNC:8933]
ENSG00000139318	0.603128	6.74347	0.403624	0.901101	DUSP6	12	89347235	89352501	-1	dual specificity phosphatase 6 [Source:HGNC Symbol;Acc:HGNC:3072]
ENSG00000139644	0.26781	9.63649	0.483669	0.901101	TMBIM6	12	49707725	49764934	1	transmembrane BAX inhibitor motif containing 6 [Source:HGNC Symbol;Acc:HGNC:11723]
ENSG00000140263	0.382142	6.87843	0.282471	0.901101	SORD	15	45023147	45077185	1	sorbitol dehydrogenase [Source:HGNC Symbol;Acc:HGNC:11184]
ENSG00000140319	0.718186	7.24294	0.0841705	0.901101	SRP14	15	40035690	40039181	-1	signal recognition particle 14 [Source:HGNC Symbol;Acc:HGNC:11299]
ENSG00000140332	-0.238278	6.96867	0.457409	0.901101	TLE3	15	70047790	70098176	-1	TLE family member 3, transcriptional corepressor [Source:HGNC Symbol;Acc:HGNC:11839]
ENSG00000140350	0.599759	7.27159	0.160812	0.901101	ANP32A	15	68778535	68820897	-1	acidic nuclear phosphoprotein 32 family member A [Source:HGNC Symbol;Acc:HGNC:13233]
ENSG00000140374	0.689317	6.77644	0.159446	0.901101	ETFA	15	76215353	76311472	-1	electron transfer flavoprotein subunit alpha [Source:HGNC Symbol;Acc:HGNC:3481]
ENSG00000140391	0.579324	7.12788	0.195984	0.901101	TSPAN3	15	77041404	77083984	-1	tetraspanin 3 [Source:HGNC Symbol;Acc:HGNC:17752]
ENSG00000140406	-0.412342	7.57699	0.354576	0.901101	TLNRD1	15	81000923	81005788	1	talin rod domain containing 1 [Source:HGNC Symbol;Acc:HGNC:13519]
ENSG00000140464	-0.342815	6.88582	0.450213	0.901101	PML	15	73994673	74047827	1	PML nuclear body scaffold [Source:HGNC Symbol;Acc:HGNC:9113]
ENSG00000140564	-0.322984	7.69524	0.281773	0.901101	FURIN	15	90868588	90883458	1	furin, paired basic amino acid cleaving enzyme [Source:HGNC Symbol;Acc:HGNC:8568]
ENSG00000140575	0.67622	7.21171	0.259592	0.901101	IQGAP1	15	90388242	90502239	1	IQ motif containing GTPase activating protein 1 [Source:HGNC Symbol;Acc:HGNC:6110]
ENSG00000140740	0.552593	7.46026	0.287634	0.901101	UQCRC2	16	21953288	21983660	1	ubiquinol-cytochrome c reductase core protein 2 [Source:HGNC Symbol;Acc:HGNC:12586]
ENSG00000140829	0.241865	6.95007	0.471351	0.901101	DHX38	16	72093613	72112912	1	DEAH-box helicase 38 [Source:HGNC Symbol;Acc:HGNC:17211]
ENSG00000140854	-0.306704	7.23214	0.479116	0.901101	KATNB1	16	57735739	57757244	1	katanin regulatory subunit B1 [Source:HGNC Symbol;Acc:HGNC:6217]
ENSG00000140941	0.678158	7.76227	0.336738	0.901101	MAP1LC3B	16	87383953	87404779	1	microtubule associated protein 1 light chain 3 beta [Source:HGNC Symbol;Acc:HGNC:13352]
ENSG00000140943	0.440536	7.85781	0.27797	0.901101	MBTPS1	16	84053761	84116942	-1	membrane bound transcription factor peptidase, site 1 [Source:HGNC Symbol;Acc:HGNC:15456]
ENSG00000140988	-0.345641	12.8545	0.458991	0.901101	RPS2	16	1962058	1964841	-1	ribosomal protein S2 [Source:HGNC Symbol;Acc:HGNC:10404]
ENSG00000140995	-0.240841	7.58417	0.416247	0.901101	DEF8	16	89948697	89968060	1	differentially expressed in FDCP 8 homolog [Source:HGNC Symbol;Acc:HGNC:25969]
ENSG00000141076	0.283428	7.3239	0.361994	0.901101	UTP4	16	69131291	69231130	1	UTP4 small subunit processome component [Source:HGNC Symbol;Acc:HGNC:1983]
ENSG00000141279	0.634714	7.0814	0.196162	0.901101	NPEPPS	17	47522942	47624665	1	aminopeptidase puromycin sensitive [Source:HGNC Symbol;Acc:HGNC:7900]
ENSG00000141367	0.681353	8.86155	0.259965	0.901101	CLTC	17	59619689	59696956	1	clathrin heavy chain [Source:HGNC Symbol;Acc:HGNC:2092]
ENSG00000141456	-0.401679	7.75136	0.212044	0.901101	PELP1	17	4669774	4704337	-1	proline, glutamate and leucine rich protein 1 [Source:HGNC Symbol;Acc:HGNC:30134]
ENSG00000141522	-0.637975	9.27863	0.19579	0.901101	ARHGDIA	17	81867721	81871378	-1	Rho GDP dissociation inhibitor alpha [Source:HGNC Symbol;Acc:HGNC:678]
ENSG00000141524	-0.618549	8.15739	0.0548726	0.901101	TMC6	17	78107397	78132407	-1	transmembrane channel like 6 [Source:HGNC Symbol;Acc:HGNC:18021]
ENSG00000141543	0.230627	8.22244	0.479073	0.901101	EIF4A3	17	80134369	80147151	-1	eukaryotic translation initiation factor 4A3 [Source:HGNC Symbol;Acc:HGNC:18683]
ENSG00000141580	0.409826	7.77212	0.294578	0.901101	WDR45B	17	82614562	82648553	-1	WD repeat domain 45B [Source:HGNC Symbol;Acc:HGNC:25072]
ENSG00000141682	1.04723	6.67061	0.114418	0.901101	PMAIP1	18	59899996	59904305	1	phorbol-12-myristate-13-acetate-induced protein 1 [Source:HGNC Symbol;Acc:HGNC:9108]
ENSG00000141736	-0.24911	7.38366	0.415496	0.901101	ERBB2	17	39687914	39730426	1	erb-b2 receptor tyrosine kinase 2 [Source:HGNC Symbol;Acc:HGNC:3430]
ENSG00000141738	-0.561597	6.82557	0.15898	0.901101	GRB7	17	39737927	39747291	1	growth factor receptor bound protein 7 [Source:HGNC Symbol;Acc:HGNC:4567]
ENSG00000141759	0.282072	6.95574	0.385233	0.901101	TXNL4A	18	79970813	80033949	-1	thioredoxin like 4A [Source:HGNC Symbol;Acc:HGNC:30551]
ENSG00000141858	-0.788922	7.33331	0.271456	0.901101	SAMD1	19	14087851	14091036	-1	sterile alpha motif domain containing 1 [Source:HGNC Symbol;Acc:HGNC:17958]
ENSG00000141905	-0.257665	7.8114	0.376625	0.901101	NFIC	19	3314403	3469217	1	nuclear factor I C [Source:HGNC Symbol;Acc:HGNC:7786]
ENSG00000141959	-0.417761	9.22084	0.402883	0.901101	PFKL	21	44300051	44327376	1	phosphofructokinase, liver type [Source:HGNC Symbol;Acc:HGNC:8876]
ENSG00000141971	-0.551518	7.45229	0.243548	0.901101	MVB12A	19	17405722	17433724	1	multivesicular body subunit 12A [Source:HGNC Symbol;Acc:HGNC:25153]
ENSG00000141985	-0.405175	8.1583	0.31256	0.901101	SH3GL1	19	4360370	4400547	-1	SH3 domain containing GRB2 like 1, endophilin A2 [Source:HGNC Symbol;Acc:HGNC:10830]
ENSG00000142002	-0.212049	7.71587	0.474864	0.901101	DPP9	19	4675224	4724673	-1	dipeptidyl peptidase 9 [Source:HGNC Symbol;Acc:HGNC:18648]
ENSG00000142089	-0.474944	9.47336	0.223356	0.901101	IFITM3	11	319676	327537	-1	interferon induced transmembrane protein 3 [Source:HGNC Symbol;Acc:HGNC:5414]
ENSG00000142156	-0.286581	8.93503	0.382293	0.901101	COL6A1	21	45981769	46005050	1	collagen type VI alpha 1 chain [Source:HGNC Symbol;Acc:HGNC:2211]
ENSG00000142168	0.495375	7.91369	0.17051	0.901101	SOD1	21	31659666	31668931	1	superoxide dismutase 1 [Source:HGNC Symbol;Acc:HGNC:11179]
ENSG00000142173	-0.561198	9.00035	0.10382	0.901101	COL6A2	21	46098112	46132848	1	collagen type VI alpha 2 chain [Source:HGNC Symbol;Acc:HGNC:2212]
ENSG00000142186	-0.33082	7.37523	0.327929	0.901101	SCYL1	11	65525077	65538704	1	SCY1 like pseudokinase 1 [Source:HGNC Symbol;Acc:HGNC:14372]
ENSG00000142192	0.524828	9.49902	0.3391	0.901101	APP	21	25880550	26171128	-1	amyloid beta precursor protein [Source:HGNC Symbol;Acc:HGNC:620]
ENSG00000142208	-0.224657	8.23314	0.477896	0.901101	AKT1	14	104769349	104795751	-1	AKT serine/threonine kinase 1 [Source:HGNC Symbol;Acc:HGNC:391]
ENSG00000142327	-0.889419	7.94749	0.0970224	0.901101	RNPEPL1	2	240565804	240581372	1	arginyl aminopeptidase like 1 [Source:HGNC Symbol;Acc:HGNC:10079]
ENSG00000142409	-0.484392	7.17232	0.343217	0.901101	ZNF787	19	56087366	56121295	-1	zinc finger protein 787 [Source:HGNC Symbol;Acc:HGNC:26998]
ENSG00000142453	-0.278832	8.1836	0.488876	0.901101	CARM1	19	10871553	10923075	1	coactivator associated arginine methyltransferase 1 [Source:HGNC Symbol;Acc:HGNC:23393]
ENSG00000142459	-0.501745	7.15754	0.250724	0.901101	EVI5L	19	7830233	7864976	1	ecotropic viral integration site 5 like [Source:HGNC Symbol;Acc:HGNC:30464]
ENSG00000142544	-0.688142	6.84704	0.323958	0.901101	CTU1	19	51097606	51108409	-1	cytosolic thiouridylase subunit 1 [Source:HGNC Symbol;Acc:HGNC:29590]
ENSG00000142546	-0.537828	8.6874	0.291055	0.901101	NOSIP	19	49555468	49590262	-1	nitric oxide synthase interacting protein [Source:HGNC Symbol;Acc:HGNC:17946]
ENSG00000142632	-0.235806	6.99159	0.445686	0.901101	ARHGEF19	1	16197854	16212652	-1	Rho guanine nucleotide exchange factor 19 [Source:HGNC Symbol;Acc:HGNC:26604]
ENSG00000142669	-0.357162	7.49661	0.394437	0.901101	SH3BGRL3	1	26280086	26281522	1	SH3 domain binding glutamate rich protein like 3 [Source:HGNC Symbol;Acc:HGNC:15568]
ENSG00000142676	0.54318	9.25892	0.437242	0.901101	RPL11	1	23691742	23696835	1	ribosomal protein L11 [Source:HGNC Symbol;Acc:HGNC:10301]
ENSG00000142784	-0.265426	6.86744	0.456969	0.901101	WDTC1	1	27234632	27308636	1	WD and tetratricopeptide repeats 1 [Source:HGNC Symbol;Acc:HGNC:29175]
ENSG00000142798	-0.543	8.68704	0.254748	0.901101	HSPG2	1	21822244	21937310	-1	heparan sulfate proteoglycan 2 [Source:HGNC Symbol;Acc:HGNC:5273]
ENSG00000142864	0.621181	8.804	0.258698	0.901101	SERBP1	1	67407810	67430415	-1	SERPINE1 mRNA binding protein 1 [Source:HGNC Symbol;Acc:HGNC:17860]
ENSG00000142949	-0.335703	9.77618	0.394906	0.901101	PTPRF	1	43525187	43623666	1	protein tyrosine phosphatase receptor type F [Source:HGNC Symbol;Acc:HGNC:9670]
ENSG00000143106	0.639291	6.71019	0.233316	0.901101	PSMA5	1	109399042	109426448	-1	proteasome 20S subunit alpha 5 [Source:HGNC Symbol;Acc:HGNC:9534]
ENSG00000143384	0.5381	7.74753	0.373441	0.901101	MCL1	1	150560895	150579738	-1	MCL1 apoptosis regulator, BCL2 family member [Source:HGNC Symbol;Acc:HGNC:6943]
ENSG00000143398	0.561209	6.6524	0.352224	0.901101	PIP5K1A	1	151197949	151249536	1	phosphatidylinositol-4-phosphate 5-kinase type 1 alpha [Source:HGNC Symbol;Acc:HGNC:8994]
ENSG00000143420	0.413376	6.85859	0.266927	0.901101	ENSA	1	150600851	150629612	-1	endosulfine alpha [Source:HGNC Symbol;Acc:HGNC:3360]
ENSG00000143537	-0.382149	8.54319	0.325591	0.901101	ADAM15	1	155050566	155062775	1	ADAM metallopeptidase domain 15 [Source:HGNC Symbol;Acc:HGNC:193]
ENSG00000143549	0.41744	8.80942	0.19632	0.901101	TPM3	1	154155304	154194648	-1	tropomyosin 3 [Source:HGNC Symbol;Acc:HGNC:12012]
ENSG00000143612	0.262091	8.08352	0.44472	0.901101	C1orf43	1	154206696	154220637	-1	chromosome 1 open reading frame 43 [Source:HGNC Symbol;Acc:HGNC:29876]
ENSG00000143621	0.36687	8.1322	0.249732	0.901101	ILF2	1	153661788	153671028	-1	interleukin enhancer binding factor 2 [Source:HGNC Symbol;Acc:HGNC:6037]
ENSG00000143799	0.465438	8.18434	0.272489	0.901101	PARP1	1	226360210	226408154	-1	poly(ADP-ribose) polymerase 1 [Source:HGNC Symbol;Acc:HGNC:270]
ENSG00000143870	0.401003	7.46814	0.387638	0.901101	PDIA6	2	10783391	10837977	-1	protein disulfide isomerase family A member 6 [Source:HGNC Symbol;Acc:HGNC:30168]
ENSG00000143933	0.525348	7.81074	0.109481	0.901101	CALM2	2	47160083	47176921	-1	calmodulin 2 [Source:HGNC Symbol;Acc:HGNC:1445]
ENSG00000143947	0.407028	9.26685	0.258302	0.901101	RPS27A	2	55231903	55235853	1	ribosomal protein S27a [Source:HGNC Symbol;Acc:HGNC:10417]
ENSG00000144021	0.260978	6.95453	0.497856	0.901101	CIAO1	2	96266159	96274173	1	cytosolic iron-sulfur assembly component 1 [Source:HGNC Symbol;Acc:HGNC:14280]
ENSG00000144028	0.257818	8.9409	0.466525	0.901101	SNRNP200	2	96274338	96321271	-1	small nuclear ribonucleoprotein U5 subunit 200 [Source:HGNC Symbol;Acc:HGNC:30859]
ENSG00000144136	0.562154	7.32837	0.32438	0.901101	SLC20A1	2	112645939	112663825	1	solute carrier family 20 member 1 [Source:HGNC Symbol;Acc:HGNC:10946]
ENSG00000144381	0.856575	9.62813	0.112633	0.901101	HSPD1	2	197486584	197516737	-1	heat shock protein family D (Hsp60) member 1 [Source:HGNC Symbol;Acc:HGNC:5261]
ENSG00000144485	-0.586646	7.5691	0.241047	0.901101	HES6	2	238238267	238240662	-1	hes family bHLH transcription factor 6 [Source:HGNC Symbol;Acc:HGNC:18254]
ENSG00000144824	0.82894	6.68861	0.296372	0.901101	PHLDB2	3	111732497	111976517	1	pleckstrin homology like domain family B member 2 [Source:HGNC Symbol;Acc:HGNC:29573]
ENSG00000144827	0.479064	7.31244	0.465709	0.901101	ABHD10	3	111979010	111993368	1	abhydrolase domain containing 10, depalmitoylase [Source:HGNC Symbol;Acc:HGNC:25656]
ENSG00000145214	-0.257992	7.48319	0.45336	0.901101	DGKQ	4	958887	986895	-1	diacylglycerol kinase theta [Source:HGNC Symbol;Acc:HGNC:2856]
ENSG00000145425	0.315696	9.52369	0.358769	0.901101	RPS3A	4	151099624	151104642	1	ribosomal protein S3A [Source:HGNC Symbol;Acc:HGNC:10421]
ENSG00000145495	0.730776	6.93113	0.401285	0.901101	MARCHF6	5	10353695	10440388	1	membrane associated ring-CH-type finger 6 [Source:HGNC Symbol;Acc:HGNC:30550]
ENSG00000145632	0.731548	7.58371	0.192878	0.901101	PLK2	5	58453982	58460139	-1	polo like kinase 2 [Source:HGNC Symbol;Acc:HGNC:19699]
ENSG00000145730	0.521438	7.33501	0.313489	0.901101	PAM	5	102753981	103031105	1	peptidylglycine alpha-amidating monooxygenase [Source:HGNC Symbol;Acc:HGNC:8596]
ENSG00000145741	0.400424	9.06599	0.242398	0.901101	BTF3	5	73498408	73505635	1	basic transcription factor 3 [Source:HGNC Symbol;Acc:HGNC:1125]
ENSG00000145782	0.587227	7.51949	0.499263	0.901101	ATG12	5	115828200	115841837	-1	autophagy related 12 [Source:HGNC Symbol;Acc:HGNC:588]
ENSG00000145907	0.733311	7.76403	0.160767	0.901101	G3BP1	5	151771045	151812911	1	G3BP stress granule assembly factor 1 [Source:HGNC Symbol;Acc:HGNC:30292]
ENSG00000146223	0.592163	7.57747	0.260077	0.901101	RPL7L1	6	42879616	42889925	1	ribosomal protein L7 like 1 [Source:HGNC Symbol;Acc:HGNC:21370]
ENSG00000146425	0.386385	6.79775	0.338091	0.901101	DYNLT1	6	158636474	158644743	-1	dynein light chain Tctex-type 1 [Source:HGNC Symbol;Acc:HGNC:11697]
ENSG00000146540	-0.573997	7.18702	0.235894	0.901101	C7orf50	7	996986	1138260	-1	chromosome 7 open reading frame 50 [Source:HGNC Symbol;Acc:HGNC:22421]
ENSG00000146701	-0.3157	9.53526	0.441254	0.901101	MDH2	7	76048051	76067508	1	malate dehydrogenase 2 [Source:HGNC Symbol;Acc:HGNC:6971]
ENSG00000146731	0.833789	8.49217	0.173769	0.901101	CCT6A	7	56051685	56063989	1	chaperonin containing TCP1 subunit 6A [Source:HGNC Symbol;Acc:HGNC:1620]
ENSG00000147010	0.49548	7.49609	0.415389	0.901101	SH3KBP1	X	19533977	19887600	-1	SH3 domain containing kinase binding protein 1 [Source:HGNC Symbol;Acc:HGNC:13867]
ENSG00000147140	0.268252	9.10864	0.388858	0.901101	NONO	X	71254814	71301522	1	non-POU domain containing octamer binding [Source:HGNC Symbol;Acc:HGNC:7871]
ENSG00000147274	0.571008	7.57832	0.162187	0.901101	RBMX	X	136848004	136880764	-1	RNA binding motif protein X-linked [Source:HGNC Symbol;Acc:HGNC:9910]
ENSG00000147454	0.550013	6.72517	0.50901	0.901101	SLC25A37	8	23528956	23575463	1	solute carrier family 25 member 37 [Source:HGNC Symbol;Acc:HGNC:29786]
ENSG00000147604	0.613823	10.817	0.181985	0.901101	RPL7	8	73290242	73295789	-1	ribosomal protein L7 [Source:HGNC Symbol;Acc:HGNC:10363]
ENSG00000147649	0.617243	7.48073	0.311689	0.901101	MTDH	8	97644184	97730260	1	metadherin [Source:HGNC Symbol;Acc:HGNC:29608]
ENSG00000147676	0.929609	7.10205	0.202604	0.901101	MAL2	8	119165034	119245673	1	mal, T cell differentiation protein 2 [Source:HGNC Symbol;Acc:HGNC:13634]
ENSG00000147677	0.476656	8.64667	0.290756	0.901101	EIF3H	8	116642130	116766925	-1	eukaryotic translation initiation factor 3 subunit H [Source:HGNC Symbol;Acc:HGNC:3273]
ENSG00000147799	-0.351336	7.29052	0.271592	0.901101	ARHGAP39	8	144529179	144605816	-1	Rho GTPase activating protein 39 [Source:HGNC Symbol;Acc:HGNC:29351]
ENSG00000147804	-0.401494	7.81115	0.327665	0.901101	SLC39A4	8	144409742	144416844	-1	solute carrier family 39 member 4 [Source:HGNC Symbol;Acc:HGNC:17129]
ENSG00000147813	-0.593634	8.27763	0.157552	0.901101	NAPRT	8	143574785	143578649	-1	nicotinate phosphoribosyltransferase [Source:HGNC Symbol;Acc:HGNC:30450]
ENSG00000148180	-0.373051	8.06283	0.22598	0.901101	GSN	9	121207794	121332843	1	gelsolin [Source:HGNC Symbol;Acc:HGNC:4620]
ENSG00000148334	-0.375902	8.38543	0.389958	0.901101	PTGES2	9	128120693	128128462	-1	prostaglandin E synthase 2 [Source:HGNC Symbol;Acc:HGNC:17822]
ENSG00000148337	-0.221421	8.00826	0.500232	0.901101	CIZ1	9	128161251	128204383	-1	CDKN1A interacting zinc finger protein 1 [Source:HGNC Symbol;Acc:HGNC:16744]
ENSG00000148341	-0.276468	7.64508	0.38765	0.901101	SH3GLB2	9	129007036	129028331	-1	SH3 domain containing GRB2 like, endophilin B2 [Source:HGNC Symbol;Acc:HGNC:10834]
ENSG00000148384	-0.551817	7.03887	0.184373	0.901101	INPP5E	9	136428619	136439845	-1	inositol polyphosphate-5-phosphatase E [Source:HGNC Symbol;Acc:HGNC:21474]
ENSG00000148426	-0.760506	7.38336	0.20213	0.901101	PROSER2	10	11823339	11872277	1	proline and serine rich 2 [Source:HGNC Symbol;Acc:HGNC:23728]
ENSG00000148672	0.479592	7.38757	0.342483	0.901101	GLUD1	10	87050202	87094843	-1	glutamate dehydrogenase 1 [Source:HGNC Symbol;Acc:HGNC:4335]
ENSG00000148730	0.328816	6.89345	0.387717	0.901101	EIF4EBP2	10	70404145	70428618	1	eukaryotic translation initiation factor 4E binding protein 2 [Source:HGNC Symbol;Acc:HGNC:3289]
ENSG00000148737	0.315328	7.21593	0.496748	0.901101	TCF7L2	10	112950247	113167678	1	transcription factor 7 like 2 [Source:HGNC Symbol;Acc:HGNC:11641]
ENSG00000148773	0.428622	7.32634	0.433546	0.901101	MKI67	10	128096659	128126423	-1	marker of proliferation Ki-67 [Source:HGNC Symbol;Acc:HGNC:7107]
ENSG00000149091	-0.350222	8.13155	0.393653	0.901101	DGKZ	11	46332905	46380554	1	diacylglycerol kinase zeta [Source:HGNC Symbol;Acc:HGNC:2857]
ENSG00000149100	0.601892	7.52384	0.181883	0.901101	EIF3M	11	32583798	32606264	1	eukaryotic translation initiation factor 3 subunit M [Source:HGNC Symbol;Acc:HGNC:24460]
ENSG00000149115	-0.248903	7.43744	0.506296	0.901101	TNKS1BP1	11	57299638	57324952	-1	tankyrase 1 binding protein 1 [Source:HGNC Symbol;Acc:HGNC:19081]
ENSG00000149136	0.20818	8.35472	0.490051	0.901101	SSRP1	11	57325986	57335892	-1	structure specific recognition protein 1 [Source:HGNC Symbol;Acc:HGNC:11327]
ENSG00000149257	0.205938	7.66054	0.514712	0.901101	SERPINH1	11	75562056	75572783	1	serpin family H member 1 [Source:HGNC Symbol;Acc:HGNC:1546]
ENSG00000149476	-0.299719	7.91812	0.388792	0.901101	TKFC	11	61333220	61353295	1	triokinase and FMN cyclase [Source:HGNC Symbol;Acc:HGNC:24552]
ENSG00000149499	-0.335929	7.34173	0.318554	0.901101	EML3	11	62602218	62612775	-1	EMAP like 3 [Source:HGNC Symbol;Acc:HGNC:26666]
ENSG00000149547	0.478087	7.48824	0.185701	0.901101	EI24	11	125569280	125584684	1	EI24 autophagy associated transmembrane protein [Source:HGNC Symbol;Acc:HGNC:13276]
ENSG00000149806	-0.339648	8.37365	0.295672	0.901101	FAU	11	65120630	65122177	-1	FAU ubiquitin like and ribosomal protein S30 fusion [Source:HGNC Symbol;Acc:HGNC:3597]
ENSG00000149823	-0.49018	8.31283	0.385006	0.901101	VPS51	11	65089324	65111862	1	VPS51 subunit of GARP complex [Source:HGNC Symbol;Acc:HGNC:1172]
ENSG00000149948	0.521934	7.26265	0.513761	0.901101	HMGA2	12	65824460	65966291	1	high mobility group AT-hook 2 [Source:HGNC Symbol;Acc:HGNC:5009]
ENSG00000150093	0.835512	8.6641	0.278671	0.901101	ITGB1	10	32887273	33005792	-1	integrin subunit beta 1 [Source:HGNC Symbol;Acc:HGNC:6153]
ENSG00000150459	0.548981	7.42917	0.112614	0.901101	SAP18	13	21140514	21149084	1	Sin3A associated protein 18 [Source:HGNC Symbol;Acc:HGNC:10530]
ENSG00000150753	0.465035	8.36824	0.164457	0.901101	CCT5	5	10249929	10266389	1	chaperonin containing TCP1 subunit 5 [Source:HGNC Symbol;Acc:HGNC:1618]
ENSG00000151914	0.765988	6.55657	0.485249	0.901101	DST	6	56457987	56954649	-1	dystonin [Source:HGNC Symbol;Acc:HGNC:1090]
ENSG00000151923	0.769974	6.79946	0.243585	0.901101	TIAL1	10	119571802	119597029	-1	TIA1 cytotoxic granule associated RNA binding protein like 1 [Source:HGNC Symbol;Acc:HGNC:11804]
ENSG00000152102	0.501757	7.38255	0.412818	0.901101	FAM168B	2	131047876	131093460	-1	family with sequence similarity 168 member B [Source:HGNC Symbol;Acc:HGNC:27016]
ENSG00000152234	0.437678	9.30482	0.210416	0.901101	ATP5F1A	18	46080248	46104334	-1	ATP synthase F1 subunit alpha [Source:HGNC Symbol;Acc:HGNC:823]
ENSG00000152332	0.97543	6.74684	0.23155	0.901101	UHMK1	1	162497251	162529631	1	U2AF homology motif kinase 1 [Source:HGNC Symbol;Acc:HGNC:19683]
ENSG00000152558	0.886254	7.12959	0.213783	0.901101	TMEM123	11	102396332	102470384	-1	transmembrane protein 123 [Source:HGNC Symbol;Acc:HGNC:30138]
ENSG00000152795	0.765516	7.25169	0.225106	0.901101	HNRNPDL	4	82422564	82430408	-1	heterogeneous nuclear ribonucleoprotein D like [Source:HGNC Symbol;Acc:HGNC:5037]
ENSG00000153113	0.621383	6.77899	0.255266	0.901101	CAST	5	96525267	96779595	1	calpastatin [Source:HGNC Symbol;Acc:HGNC:1515]
ENSG00000153187	0.555644	9.03223	0.201543	0.901101	HNRNPU	1	244840638	244864560	-1	heterogeneous nuclear ribonucleoprotein U [Source:HGNC Symbol;Acc:HGNC:5048]
ENSG00000153201	0.937676	6.37206	0.340026	0.901101	RANBP2	2	108719482	108785809	1	RAN binding protein 2 [Source:HGNC Symbol;Acc:HGNC:9848]
ENSG00000153395	0.313716	7.0805	0.489525	0.901101	LPCAT1	5	1456480	1523962	-1	lysophosphatidylcholine acyltransferase 1 [Source:HGNC Symbol;Acc:HGNC:25718]
ENSG00000153827	0.779298	7.05286	0.270975	0.901101	TRIP12	2	229763837	229923239	-1	thyroid hormone receptor interactor 12 [Source:HGNC Symbol;Acc:HGNC:12306]
ENSG00000153879	0.670589	6.47917	0.494984	0.901101	CEBPG	19	33373685	33382686	1	CCAAT enhancer binding protein gamma [Source:HGNC Symbol;Acc:HGNC:1837]
ENSG00000153944	0.634615	6.76575	0.370137	0.901101	MSI2	17	57255851	57684689	1	musashi RNA binding protein 2 [Source:HGNC Symbol;Acc:HGNC:18585]
ENSG00000154380	0.541133	6.77746	0.480854	0.901101	ENAH	1	225486835	225653142	-1	ENAH actin regulator [Source:HGNC Symbol;Acc:HGNC:18271]
ENSG00000154473	0.649162	7.50514	0.167098	0.901101	BUB3	10	123154402	123170467	1	BUB3 mitotic checkpoint protein [Source:HGNC Symbol;Acc:HGNC:1151]
ENSG00000155090	0.489144	7.18298	0.254666	0.901101	KLF10	8	102648784	102655725	-1	Kruppel like factor 10 [Source:HGNC Symbol;Acc:HGNC:11810]
ENSG00000155096	0.630899	7.39698	0.293658	0.901101	AZIN1	8	102826308	102893864	-1	antizyme inhibitor 1 [Source:HGNC Symbol;Acc:HGNC:16432]
ENSG00000155189	0.95684	6.73697	0.14282	0.901101	AGPAT5	8	6708642	6761503	1	1-acylglycerol-3-phosphate O-acyltransferase 5 [Source:HGNC Symbol;Acc:HGNC:20886]
ENSG00000155366	-0.422121	7.6204	0.233352	0.901101	RHOC	1	112701127	112707434	-1	ras homolog family member C [Source:HGNC Symbol;Acc:HGNC:669]
ENSG00000155380	0.835627	6.91383	0.256998	0.901101	SLC16A1	1	112911847	112957013	-1	solute carrier family 16 member 1 [Source:HGNC Symbol;Acc:HGNC:10922]
ENSG00000155506	0.376172	7.93205	0.484702	0.901101	LARP1	5	154712843	154817605	1	La ribonucleoprotein 1, translational regulator [Source:HGNC Symbol;Acc:HGNC:29531]
ENSG00000155660	0.312728	8.85166	0.421202	0.901101	PDIA4	7	149003062	149028662	-1	protein disulfide isomerase family A member 4 [Source:HGNC Symbol;Acc:HGNC:30167]
ENSG00000156261	0.952493	7.90616	0.128372	0.901101	CCT8	21	29055805	29073797	-1	chaperonin containing TCP1 subunit 8 [Source:HGNC Symbol;Acc:HGNC:1623]
ENSG00000156381	-0.667297	6.92585	0.153707	0.901101	ANKRD9	14	102501767	102509799	-1	ankyrin repeat domain 9 [Source:HGNC Symbol;Acc:HGNC:20096]
ENSG00000156467	0.485606	6.94545	0.179248	0.901101	UQCRB	8	96222947	96235546	-1	ubiquinol-cytochrome c reductase binding protein [Source:HGNC Symbol;Acc:HGNC:12582]
ENSG00000156471	0.377353	6.68242	0.351503	0.901101	PTDSS1	8	96261902	96336995	1	phosphatidylserine synthase 1 [Source:HGNC Symbol;Acc:HGNC:9587]
ENSG00000156508	0.389921	14.0709	0.414766	0.901101	EEF1A1	6	73489308	73525587	-1	eukaryotic translation elongation factor 1 alpha 1 [Source:HGNC Symbol;Acc:HGNC:3189]
ENSG00000156599	0.461053	7.3537	0.253664	0.901101	ZDHHC5	11	57667747	57701182	1	zinc finger DHHC-type palmitoyltransferase 5 [Source:HGNC Symbol;Acc:HGNC:18472]
ENSG00000156639	0.343673	7.15868	0.496098	0.901101	ZFAND3	6	37819727	38154624	1	zinc finger AN1-type containing 3 [Source:HGNC Symbol;Acc:HGNC:18019]
ENSG00000156976	0.742822	8.31482	0.390548	0.901101	EIF4A2	3	186783205	186789897	1	eukaryotic translation initiation factor 4A2 [Source:HGNC Symbol;Acc:HGNC:3284]
ENSG00000157483	0.417286	7.06526	0.347224	0.901101	MYO1E	15	59132434	59372871	-1	myosin IE [Source:HGNC Symbol;Acc:HGNC:7599]
ENSG00000157637	-0.313559	8.72839	0.345674	0.901101	SLC38A10	17	81244811	81295547	-1	solute carrier family 38 member 10 [Source:HGNC Symbol;Acc:HGNC:28237]
ENSG00000157954	0.204672	7.16249	0.489715	0.901101	WIPI2	7	5190196	5233840	1	WD repeat domain, phosphoinositide interacting 2 [Source:HGNC Symbol;Acc:HGNC:32225]
ENSG00000158417	0.773187	7.49056	0.261431	0.901101	EIF5B	2	99337371	99401326	1	eukaryotic translation initiation factor 5B [Source:HGNC Symbol;Acc:HGNC:30793]
ENSG00000158470	0.536306	7.6057	0.282149	0.901101	B4GALT5	20	49632945	49713878	-1	beta-1,4-galactosyltransferase 5 [Source:HGNC Symbol;Acc:HGNC:928]
ENSG00000158747	-0.444927	6.95253	0.205901	0.901101	NBL1	1	19596979	19658456	1	NBL1, DAN family BMP antagonist [Source:HGNC Symbol;Acc:HGNC:7650]
ENSG00000158792	-0.647382	7.23203	0.165733	0.901101	SPATA2L	16	89696357	89701705	-1	spermatogenesis associated 2 like [Source:HGNC Symbol;Acc:HGNC:28393]
ENSG00000158856	-0.380458	7.40224	0.255309	0.901101	DMTN	8	22048995	22082527	1	dematin actin binding protein [Source:HGNC Symbol;Acc:HGNC:3382]
ENSG00000159131	0.549466	7.67443	0.241884	0.901101	GART	21	33503931	33543491	-1	phosphoribosylglycinamide formyltransferase, phosphoribosylglycinamide synthetase, phosphoribosylaminoimidazole synthetase [Source:HGNC Symbol;Acc:HGNC:4163]
ENSG00000159140	0.606864	7.66358	0.291981	0.901101	SON	21	33543038	33577481	1	SON DNA and RNA binding protein [Source:HGNC Symbol;Acc:HGNC:11183]
ENSG00000159335	-0.521914	9.50294	0.31068	0.901101	PTMS	12	6765516	6770952	1	parathymosin [Source:HGNC Symbol;Acc:HGNC:9629]
ENSG00000159352	0.274324	7.61419	0.378784	0.901101	PSMD4	1	151254709	151267479	1	proteasome 26S subunit, non-ATPase 4 [Source:HGNC Symbol;Acc:HGNC:9561]
ENSG00000159363	-0.584453	7.92848	0.195549	0.901101	ATP13A2	1	16985958	17011928	-1	ATPase cation transporting 13A2 [Source:HGNC Symbol;Acc:HGNC:30213]
ENSG00000159840	-0.650447	9.4935	0.206768	0.901101	ZYX	7	143381295	143391111	1	zyxin [Source:HGNC Symbol;Acc:HGNC:13200]
ENSG00000160113	-0.639388	8.74406	0.223249	0.901101	NR2F6	19	17231883	17245940	-1	nuclear receptor subfamily 2 group F member 6 [Source:HGNC Symbol;Acc:HGNC:7977]
ENSG00000160161	-0.847189	7.52014	0.0385238	0.901101	CILP2	19	19538248	19546659	1	cartilage intermediate layer protein 2 [Source:HGNC Symbol;Acc:HGNC:24213]
ENSG00000160208	0.461983	6.94116	0.3709	0.901101	RRP1B	21	43659560	43696079	1	ribosomal RNA processing 1B [Source:HGNC Symbol;Acc:HGNC:23818]
ENSG00000160360	-0.790232	7.70927	0.0594007	0.901101	GPSM1	9	136327476	136359605	1	G protein signaling modulator 1 [Source:HGNC Symbol;Acc:HGNC:17858]
ENSG00000160410	-0.55785	8.02402	0.268309	0.901101	SHKBP1	19	40576853	40591399	1	SH3KBP1 binding protein 1 [Source:HGNC Symbol;Acc:HGNC:19214]
ENSG00000160447	-0.434644	7.40979	0.248425	0.901101	PKN3	9	128702503	128720916	1	protein kinase N3 [Source:HGNC Symbol;Acc:HGNC:17999]
ENSG00000160633	0.329849	7.99283	0.366604	0.901101	SAFB	19	5623035	5668478	1	scaffold attachment factor B [Source:HGNC Symbol;Acc:HGNC:10520]
ENSG00000160710	0.419026	8.32757	0.372345	0.901101	ADAR	1	154582057	154628013	-1	adenosine deaminase RNA specific [Source:HGNC Symbol;Acc:HGNC:225]
ENSG00000160767	-0.419366	7.19593	0.25949	0.901101	FAM189B	1	155247205	155255483	-1	family with sequence similarity 189 member B [Source:HGNC Symbol;Acc:HGNC:1233]
ENSG00000160867	-0.653673	8.13158	0.104848	0.901101	FGFR4	5	177086905	177098144	1	fibroblast growth factor receptor 4 [Source:HGNC Symbol;Acc:HGNC:3691]
ENSG00000160877	-0.306445	8.48932	0.344314	0.901101	NACC1	19	13116862	13141147	1	nucleus accumbens associated 1 [Source:HGNC Symbol;Acc:HGNC:20967]
ENSG00000160932	-0.525637	9.10919	0.327746	0.901101	LY6E	8	143017982	143023832	1	lymphocyte antigen 6 family member E [Source:HGNC Symbol;Acc:HGNC:6727]
ENSG00000160948	-0.308679	8.33409	0.369574	0.901101	VPS28	8	144423601	144428563	-1	VPS28 subunit of ESCRT-I [Source:HGNC Symbol;Acc:HGNC:18178]
ENSG00000160949	-0.330769	7.36692	0.405273	0.901101	TONSL	8	144428775	144444440	-1	tonsoku like, DNA repair protein [Source:HGNC Symbol;Acc:HGNC:7801]
ENSG00000160957	-0.349586	8.01722	0.400238	0.901101	RECQL4	8	144511288	144517845	-1	RecQ like helicase 4 [Source:HGNC Symbol;Acc:HGNC:9949]
ENSG00000160972	-0.416313	7.83657	0.380537	0.901101	PPP1R16A	8	144477969	144502121	1	protein phosphatase 1 regulatory subunit 16A [Source:HGNC Symbol;Acc:HGNC:14941]
ENSG00000161016	-0.381329	12.9459	0.335543	0.901101	RPL8	8	144789765	144792587	-1	ribosomal protein L8 [Source:HGNC Symbol;Acc:HGNC:10368]
ENSG00000161036	-0.30879	6.86466	0.494689	0.901101	LRWD1	7	102464956	102473168	1	leucine rich repeats and WD repeat domain containing 1 [Source:HGNC Symbol;Acc:HGNC:21769]
ENSG00000161091	-0.243987	8.08509	0.496238	0.901101	MFSD12	19	3538261	3574290	-1	major facilitator superfamily domain containing 12 [Source:HGNC Symbol;Acc:HGNC:28299]
ENSG00000161179	-0.497017	8.36606	0.354478	0.901101	YDJC	22	21628089	21630064	-1	YdjC chitooligosaccharide deacetylase homolog [Source:HGNC Symbol;Acc:HGNC:27158]
ENSG00000161513	-0.283262	9.06079	0.480835	0.901101	FDXR	17	74862497	74873031	-1	ferredoxin reductase [Source:HGNC Symbol;Acc:HGNC:3642]
ENSG00000161526	0.235023	7.04163	0.46079	0.901101	SAP30BP	17	75667251	75708062	1	SAP30 binding protein [Source:HGNC Symbol;Acc:HGNC:30785]
ENSG00000161618	-0.484994	6.39818	0.457952	0.901101	ALDH16A1	19	49453225	49471050	1	aldehyde dehydrogenase 16 family member A1 [Source:HGNC Symbol;Acc:HGNC:28114]
ENSG00000161638	-0.334063	7.09687	0.329467	0.901101	ITGA5	12	54395261	54419266	-1	integrin subunit alpha 5 [Source:HGNC Symbol;Acc:HGNC:6141]
ENSG00000161682	-0.713768	6.76549	0.170846	0.901101	FAM171A2	17	44353215	44363853	-1	family with sequence similarity 171 member A2 [Source:HGNC Symbol;Acc:HGNC:30480]
ENSG00000161847	-0.882034	7.72867	0.208787	0.901101	RAVER1	19	10316212	10333638	-1	ribonucleoprotein, PTB binding 1 [Source:HGNC Symbol;Acc:HGNC:30296]
ENSG00000161921	-0.354189	7.67548	0.307783	0.901101	CXCL16	17	4733533	4739928	-1	C-X-C motif chemokine ligand 16 [Source:HGNC Symbol;Acc:HGNC:16642]
ENSG00000161999	-0.564484	7.56378	0.274001	0.901101	JMJD8	16	681670	684528	-1	jumonji domain containing 8 [Source:HGNC Symbol;Acc:HGNC:14148]
ENSG00000162302	-0.509921	8.53251	0.357863	0.901101	RPS6KA4	11	64359148	64372215	1	ribosomal protein S6 kinase A4 [Source:HGNC Symbol;Acc:HGNC:10433]
ENSG00000162337	-0.429993	8.48637	0.144536	0.901101	LRP5	11	68312591	68449275	1	LDL receptor related protein 5 [Source:HGNC Symbol;Acc:HGNC:6697]
ENSG00000162430	-0.482252	8.26997	0.157982	0.901101	SELENON	1	25800176	25818221	1	selenoprotein N [Source:HGNC Symbol;Acc:HGNC:15999]
ENSG00000162434	0.550434	6.79152	0.376299	0.901101	JAK1	1	64833229	65067754	-1	Janus kinase 1 [Source:HGNC Symbol;Acc:HGNC:6190]
ENSG00000162512	-0.229988	7.4055	0.487441	0.901101	SDC3	1	30869466	30908758	-1	syndecan 3 [Source:HGNC Symbol;Acc:HGNC:10660]
ENSG00000162522	-0.358558	7.59063	0.245004	0.901101	KIAA1522	1	32741830	32774970	1	KIAA1522 [Source:HGNC Symbol;Acc:HGNC:29301]
ENSG00000162585	-0.575478	7.59331	0.306567	0.901101	FAAP20	1	2184461	2212720	-1	FA core complex associated protein 20 [Source:HGNC Symbol;Acc:HGNC:26428]
ENSG00000162729	-0.632315	6.879	0.103117	0.901101	IGSF8	1	160091340	160098943	-1	immunoglobulin superfamily member 8 [Source:HGNC Symbol;Acc:HGNC:17813]
ENSG00000162909	0.449271	8.92871	0.472361	0.901101	CAPN2	1	223701593	223776018	1	calpain 2 [Source:HGNC Symbol;Acc:HGNC:1479]
ENSG00000163041	0.47537	6.73711	0.273971	0.901101	H3-3A	1	226061851	226072019	1	H3.3 histone A [Source:HGNC Symbol;Acc:HGNC:4764]
ENSG00000163399	0.30297	7.87911	0.408016	0.901101	ATP1A1	1	116372668	116410261	1	ATPase Na+/K+ transporting subunit alpha 1 [Source:HGNC Symbol;Acc:HGNC:799]
ENSG00000163435	-0.277492	7.24591	0.379562	0.901101	ELF3	1	202007945	202017183	1	E74 like ETS transcription factor 3 [Source:HGNC Symbol;Acc:HGNC:3318]
ENSG00000163466	0.594035	7.9909	0.0853303	0.901101	ARPC2	2	218217141	218254356	1	actin related protein 2/3 complex subunit 2 [Source:HGNC Symbol;Acc:HGNC:705]
ENSG00000163468	0.294868	9.63138	0.394796	0.901101	CCT3	1	156308968	156367873	-1	chaperonin containing TCP1 subunit 3 [Source:HGNC Symbol;Acc:HGNC:1616]
ENSG00000163527	0.680879	7.09837	0.324705	0.901101	STT3B	3	31532638	31637616	1	STT3 oligosaccharyltransferase complex catalytic subunit B [Source:HGNC Symbol;Acc:HGNC:30611]
ENSG00000163584	0.531633	7.11038	0.124193	0.901101	RPL22L1	3	170864875	170870208	-1	ribosomal protein L22 like 1 [Source:HGNC Symbol;Acc:HGNC:27610]
ENSG00000163811	0.972193	6.63247	0.215529	0.901101	WDR43	2	28894667	28948219	1	WD repeat domain 43 [Source:HGNC Symbol;Acc:HGNC:28945]
ENSG00000163938	0.891207	7.22711	0.305108	0.901101	GNL3	3	52681156	52694497	1	G protein nucleolar 3 [Source:HGNC Symbol;Acc:HGNC:29931]
ENSG00000163975	-0.591204	7.79146	0.115456	0.901101	MELTF	3	196988621	197029817	-1	melanotransferrin [Source:HGNC Symbol;Acc:HGNC:7037]
ENSG00000164032	0.355521	7.91795	0.28072	0.901101	H2AZ1	4	99948086	99950355	-1	H2A.Z variant histone 1 [Source:HGNC Symbol;Acc:HGNC:4741]
ENSG00000164062	-0.391435	8.57222	0.322165	0.901101	APEH	3	49674014	49683971	1	acylaminoacyl-peptide hydrolase [Source:HGNC Symbol;Acc:HGNC:586]
ENSG00000164091	0.479543	7.57882	0.273703	0.901101	WDR82	3	52254434	52288020	-1	WD repeat domain 82 [Source:HGNC Symbol;Acc:HGNC:28826]
ENSG00000164104	0.709904	7.11405	0.138405	0.901101	HMGB2	4	173331376	173334432	-1	high mobility group box 2 [Source:HGNC Symbol;Acc:HGNC:5000]
ENSG00000164111	0.267468	8.05874	0.388214	0.901101	ANXA5	4	121667946	121696995	-1	annexin A5 [Source:HGNC Symbol;Acc:HGNC:543]
ENSG00000164163	0.87729	6.84451	0.174639	0.901101	ABCE1	4	145098288	145129524	1	ATP binding cassette subfamily E member 1 [Source:HGNC Symbol;Acc:HGNC:69]
ENSG00000164237	0.564639	6.90955	0.151666	0.901101	CMBL	5	10275875	10307902	-1	carboxymethylenebutenolidase homolog [Source:HGNC Symbol;Acc:HGNC:25090]
ENSG00000164638	-0.71949	7.41831	0.0961124	0.901101	SLC29A4	7	5274369	5306870	1	solute carrier family 29 member 4 [Source:HGNC Symbol;Acc:HGNC:23097]
ENSG00000164754	0.795202	7.33934	0.188869	0.901101	RAD21	8	116845934	116874776	-1	RAD21 cohesin complex component [Source:HGNC Symbol;Acc:HGNC:9811]
ENSG00000164818	-0.262382	7.38062	0.440969	0.901101	DNAAF5	7	726699	786475	1	dynein axonemal assembly factor 5 [Source:HGNC Symbol;Acc:HGNC:26013]
ENSG00000164880	-0.579951	9.88109	0.294982	0.901101	INTS1	7	1470277	1504389	-1	integrator complex subunit 1 [Source:HGNC Symbol;Acc:HGNC:24555]
ENSG00000164897	-0.537755	7.51776	0.283294	0.901101	TMUB1	7	151081085	151083493	-1	transmembrane and ubiquitin like domain containing 1 [Source:HGNC Symbol;Acc:HGNC:21709]
ENSG00000164924	0.72737	9.95457	0.141335	0.901101	YWHAZ	8	100916523	100953388	-1	tyrosine 3-monooxygenase/tryptophan 5-monooxygenase activation protein zeta [Source:HGNC Symbol;Acc:HGNC:12855]
ENSG00000164951	0.772331	9.29771	0.24797	0.901101	PDP1	8	93857807	93926068	1	pyruvate dehyrogenase phosphatase catalytic subunit 1 [Source:HGNC Symbol;Acc:HGNC:9279]
ENSG00000165119	0.657814	9.13424	0.108456	0.901101	HNRNPK	9	83968083	83980616	-1	heterogeneous nuclear ribonucleoprotein K [Source:HGNC Symbol;Acc:HGNC:5044]
ENSG00000165458	-0.257791	7.86995	0.410612	0.901101	INPPL1	11	72223701	72239147	1	inositol polyphosphate phosphatase like 1 [Source:HGNC Symbol;Acc:HGNC:6080]
ENSG00000165502	0.588236	6.89142	0.271422	0.901101	RPL36AL	14	49618530	49620626	-1	ribosomal protein L36a like [Source:HGNC Symbol;Acc:HGNC:10346]
ENSG00000165629	0.505414	7.29059	0.124009	0.901101	ATP5F1C	10	7788147	7807815	1	ATP synthase F1 subunit gamma [Source:HGNC Symbol;Acc:HGNC:833]
ENSG00000165637	0.361296	7.98757	0.224897	0.901101	VDAC2	10	75210154	75231448	1	voltage dependent anion channel 2 [Source:HGNC Symbol;Acc:HGNC:12672]
ENSG00000165672	0.833118	7.53034	0.140213	0.901101	PRDX3	10	119167720	119178812	-1	peroxiredoxin 3 [Source:HGNC Symbol;Acc:HGNC:9354]
ENSG00000165678	0.631336	7.88697	0.190734	0.901101	GHITM	10	84139509	84153568	1	growth hormone inducible transmembrane protein [Source:HGNC Symbol;Acc:HGNC:17281]
ENSG00000165732	0.841834	7.86458	0.260515	0.901101	DDX21	10	68956170	68985068	1	DExD-box helicase 21 [Source:HGNC Symbol;Acc:HGNC:2744]
ENSG00000165733	0.592451	7.09692	0.321349	0.901101	BMS1	10	42782795	42834937	1	BMS1 ribosome biogenesis factor [Source:HGNC Symbol;Acc:HGNC:23505]
ENSG00000165802	-0.46879	8.73114	0.245817	0.901101	NSMF	9	137447570	137459334	-1	NMDA receptor synaptonuclear signaling and neuronal migration factor [Source:HGNC Symbol;Acc:HGNC:29843]
ENSG00000165905	-0.421381	8.18344	0.167907	0.901101	LARGE2	11	45921621	45929096	1	LARGE xylosyl- and glucuronyltransferase 2 [Source:HGNC Symbol;Acc:HGNC:16522]
ENSG00000166145	-0.377748	8.17421	0.238916	0.901101	SPINT1	15	40844018	40858207	1	serine peptidase inhibitor, Kunitz type 1 [Source:HGNC Symbol;Acc:HGNC:11246]
ENSG00000166165	-0.482627	10.3385	0.428574	0.901101	CKB	14	103519667	103522833	-1	creatine kinase B [Source:HGNC Symbol;Acc:HGNC:1991]
ENSG00000166189	-0.544087	7.59104	0.294158	0.901101	HPS6	10	102065349	102068036	1	HPS6 biogenesis of lysosomal organelles complex 2 subunit 3 [Source:HGNC Symbol;Acc:HGNC:18817]
ENSG00000166197	0.59937	8.55824	0.263139	0.901101	NOLC1	10	102152176	102163871	1	nucleolar and coiled-body phosphoprotein 1 [Source:HGNC Symbol;Acc:HGNC:15608]
ENSG00000166224	0.47105	6.77413	0.397027	0.901101	SGPL1	10	70815948	70881184	1	sphingosine-1-phosphate lyase 1 [Source:HGNC Symbol;Acc:HGNC:10817]
ENSG00000166226	0.709627	8.34293	0.0443626	0.901101	CCT2	12	69585426	69601570	1	chaperonin containing TCP1 subunit 2 [Source:HGNC Symbol;Acc:HGNC:1615]
ENSG00000166598	0.788596	9.22039	0.296003	0.901101	HSP90B1	12	103930107	103953645	1	heat shock protein 90 beta family member 1 [Source:HGNC Symbol;Acc:HGNC:12028]
ENSG00000166710	0.627972	8.28472	0.184676	0.901101	B2M	15	44711487	44718851	1	beta-2-microglobulin [Source:HGNC Symbol;Acc:HGNC:914]
ENSG00000166750	0.744507	6.19998	0.477104	0.901101	SLFN5	17	35243071	35273655	1	schlafen family member 5 [Source:HGNC Symbol;Acc:HGNC:28286]
ENSG00000166886	-0.414733	7.47104	0.205894	0.901101	NAB2	12	57089043	57095476	1	NGFI-A binding protein 2 [Source:HGNC Symbol;Acc:HGNC:7627]
ENSG00000166897	-0.28034	7.74395	0.449146	0.901101	ELFN2	22	37367960	37427479	-1	extracellular leucine rich repeat and fibronectin type III domain containing 2 [Source:HGNC Symbol;Acc:HGNC:29396]
ENSG00000166913	0.636432	7.8247	0.0697989	0.901101	YWHAB	20	44885702	44908532	1	tyrosine 3-monooxygenase/tryptophan 5-monooxygenase activation protein beta [Source:HGNC Symbol;Acc:HGNC:12849]
ENSG00000167004	0.505696	8.50968	0.231974	0.901101	PDIA3	15	43746410	43773278	1	protein disulfide isomerase family A member 3 [Source:HGNC Symbol;Acc:HGNC:4606]
ENSG00000167005	0.630301	6.68531	0.283411	0.901101	NUDT21	16	56429133	56452199	-1	nudix hydrolase 21 [Source:HGNC Symbol;Acc:HGNC:13870]
ENSG00000167106	-0.391509	7.16087	0.275611	0.901101	FAM102A	9	127940582	127980989	-1	family with sequence similarity 102 member A [Source:HGNC Symbol;Acc:HGNC:31419]
ENSG00000167114	-0.236624	7.32302	0.479046	0.901101	SLC27A4	9	128340527	128361470	1	solute carrier family 27 member 4 [Source:HGNC Symbol;Acc:HGNC:10998]
ENSG00000167123	-0.574986	7.43862	0.139768	0.901101	CERCAM	9	128411751	128437351	1	cerebral endothelial cell adhesion molecule [Source:HGNC Symbol;Acc:HGNC:23723]
ENSG00000167157	-0.876993	6.8404	0.201457	0.901101	PRRX2	9	129665647	129722674	1	paired related homeobox 2 [Source:HGNC Symbol;Acc:HGNC:21338]
ENSG00000167173	-0.571747	6.80214	0.139981	0.901101	C15orf39	15	75195643	75212169	1	chromosome 15 open reading frame 39 [Source:HGNC Symbol;Acc:HGNC:24497]
ENSG00000167291	-0.309338	6.77766	0.472748	0.901101	TBC1D16	17	79932343	80035872	-1	TBC1 domain family member 16 [Source:HGNC Symbol;Acc:HGNC:28356]
ENSG00000167460	0.469986	8.67346	0.347552	0.901101	TPM4	19	16067021	16103002	1	tropomyosin 4 [Source:HGNC Symbol;Acc:HGNC:12013]
ENSG00000167468	-0.390985	9.56606	0.417702	0.901101	GPX4	19	1103926	1106791	1	glutathione peroxidase 4 [Source:HGNC Symbol;Acc:HGNC:4556]
ENSG00000167470	-0.438305	8.58895	0.325531	0.901101	MIDN	19	1248553	1259140	1	midnolin [Source:HGNC Symbol;Acc:HGNC:16298]
ENSG00000167508	-0.48808	7.68669	0.23534	0.901101	MVD	16	88651935	88663161	-1	mevalonate diphosphate decarboxylase [Source:HGNC Symbol;Acc:HGNC:7529]
ENSG00000167513	-0.731901	8.29201	0.255368	0.901101	CDT1	16	88803789	88809258	1	chromatin licensing and DNA replication factor 1 [Source:HGNC Symbol;Acc:HGNC:24576]
ENSG00000167526	-0.473371	12.5918	0.222852	0.901101	RPL13	16	89560677	89564542	1	ribosomal protein L13 [Source:HGNC Symbol;Acc:HGNC:10303]
ENSG00000167645	-0.458014	7.30497	0.303396	0.901101	YIF1B	19	38303558	38317273	-1	Yip1 interacting factor homolog B, membrane trafficking protein [Source:HGNC Symbol;Acc:HGNC:30511]
ENSG00000167658	-0.504672	13.7371	0.229592	0.901101	EEF2	19	3976056	3985463	-1	eukaryotic translation elongation factor 2 [Source:HGNC Symbol;Acc:HGNC:3214]
ENSG00000167671	-0.473122	8.11711	0.264877	0.901101	UBXN6	19	4444999	4457794	-1	UBX domain protein 6 [Source:HGNC Symbol;Acc:HGNC:14928]
ENSG00000167674	-0.240182	7.62614	0.503023	0.901101	HDGFL2	19	4472297	4502208	1	HDGF like 2 [Source:HGNC Symbol;Acc:HGNC:14680]
ENSG00000167680	-1.48407	10.412	0.0817044	0.901101	SEMA6B	19	4542593	4581776	-1	semaphorin 6B [Source:HGNC Symbol;Acc:HGNC:10739]
ENSG00000167685	-0.561533	6.93345	0.271863	0.901101	ZNF444	19	56132599	56160893	1	zinc finger protein 444 [Source:HGNC Symbol;Acc:HGNC:16052]
ENSG00000167700	-0.516116	7.62474	0.270988	0.901101	MFSD3	8	144509070	144511213	1	major facilitator superfamily domain containing 3 [Source:HGNC Symbol;Acc:HGNC:25157]
ENSG00000167721	0.57342	6.77776	0.296814	0.901101	TSR1	17	2322396	2336657	-1	TSR1 ribosome maturation factor [Source:HGNC Symbol;Acc:HGNC:25542]
ENSG00000167755	0.513301	7.07433	0.219648	0.901101	KLK6	19	50958631	50969673	-1	kallikrein related peptidase 6 [Source:HGNC Symbol;Acc:HGNC:6367]
ENSG00000167778	-0.281604	7.5429	0.434607	0.901101	SPRYD3	12	53064316	53079404	-1	SPRY domain containing 3 [Source:HGNC Symbol;Acc:HGNC:25920]
ENSG00000167797	-0.628128	7.77956	0.157779	0.901101	CDK2AP2	11	67506497	67508649	-1	cyclin dependent kinase 2 associated protein 2 [Source:HGNC Symbol;Acc:HGNC:30833]
ENSG00000167861	-0.63123	7.63945	0.0983439	0.901101	HID1	17	74950742	74973166	-1	HID1 domain containing [Source:HGNC Symbol;Acc:HGNC:15736]
ENSG00000167881	0.314858	8.21205	0.34158	0.901101	SRP68	17	76038775	76072517	-1	signal recognition particle 68 [Source:HGNC Symbol;Acc:HGNC:11302]
ENSG00000167900	-0.601924	8.62596	0.401752	0.901101	TK1	17	78174091	78187233	-1	thymidine kinase 1 [Source:HGNC Symbol;Acc:HGNC:11830]
ENSG00000167930	-0.58592	6.94178	0.111412	0.901101	FAM234A	16	234521	272183	1	family with sequence similarity 234 member A [Source:HGNC Symbol;Acc:HGNC:14163]
ENSG00000167962	-0.263722	7.33346	0.429755	0.901101	ZNF598	16	1997654	2009821	-1	zinc finger protein 598, E3 ubiquitin ligase [Source:HGNC Symbol;Acc:HGNC:28079]
ENSG00000167965	-0.445813	7.75066	0.395499	0.901101	MLST8	16	2204248	2209453	1	MTOR associated protein, LST8 homolog [Source:HGNC Symbol;Acc:HGNC:24825]
ENSG00000167969	-0.547818	8.50128	0.18541	0.901101	ECI1	16	2239402	2252300	-1	enoyl-CoA delta isomerase 1 [Source:HGNC Symbol;Acc:HGNC:2703]
ENSG00000168005	-0.528345	7.2054	0.177909	0.901101	SPINDOC	11	63813456	63827716	1	spindlin interactor and repressor of chromatin binding [Source:HGNC Symbol;Acc:HGNC:25115]
ENSG00000168036	0.707177	8.00103	0.190676	0.901101	CTNNB1	3	41194741	41260096	1	catenin beta 1 [Source:HGNC Symbol;Acc:HGNC:2514]
ENSG00000168056	-0.30359	10.4667	0.452098	0.901101	LTBP3	11	65538559	65558930	-1	latent transforming growth factor beta binding protein 3 [Source:HGNC Symbol;Acc:HGNC:6716]
ENSG00000168061	-0.588396	6.74694	0.399693	0.901101	SAC3D1	11	65040901	65044828	1	SAC3 domain containing 1 [Source:HGNC Symbol;Acc:HGNC:30179]
ENSG00000168067	-0.450667	6.78665	0.239176	0.901101	MAP4K2	11	64784918	64803241	-1	mitogen-activated protein kinase kinase kinase kinase 2 [Source:HGNC Symbol;Acc:HGNC:6864]
ENSG00000168092	0.707788	6.89977	0.179051	0.901101	PAFAH1B2	11	117144284	117176894	1	platelet activating factor acetylhydrolase 1b catalytic subunit 2 [Source:HGNC Symbol;Acc:HGNC:8575]
ENSG00000168137	0.52007	6.89366	0.512945	0.901101	SETD5	3	9397615	9479240	1	SET domain containing 5 [Source:HGNC Symbol;Acc:HGNC:25566]
ENSG00000168159	-0.309674	8.76478	0.444625	0.901101	RNF187	1	228487382	228496188	1	ring finger protein 187 [Source:HGNC Symbol;Acc:HGNC:27146]
ENSG00000168374	0.499796	7.1721	0.141396	0.901101	ARF4	3	57571363	57598220	-1	ADP ribosylation factor 4 [Source:HGNC Symbol;Acc:HGNC:655]
ENSG00000168385	0.863729	8.28439	0.189525	0.901101	SEPTIN2	2	241315100	241354027	1	septin 2 [Source:HGNC Symbol;Acc:HGNC:7729]
ENSG00000168488	-0.307797	8.73066	0.386198	0.901101	ATXN2L	16	28823035	28837237	1	ataxin 2 like [Source:HGNC Symbol;Acc:HGNC:31326]
ENSG00000168610	0.354024	7.32815	0.396917	0.901101	STAT3	17	42313324	42388540	-1	signal transducer and activator of transcription 3 [Source:HGNC Symbol;Acc:HGNC:11364]
ENSG00000168615	0.812611	7.29003	0.305017	0.901101	ADAM9	8	38996754	39105445	1	ADAM metallopeptidase domain 9 [Source:HGNC Symbol;Acc:HGNC:216]
ENSG00000168653	0.397602	7.42525	0.325412	0.901101	NDUFS5	1	39026318	39034636	1	NADH:ubiquinone oxidoreductase subunit S5 [Source:HGNC Symbol;Acc:HGNC:7712]
ENSG00000168785	0.432514	7.00441	0.328011	0.901101	TSPAN5	4	98470367	98658611	-1	tetraspanin 5 [Source:HGNC Symbol;Acc:HGNC:17753]
ENSG00000168906	0.695292	7.92155	0.319818	0.901101	MAT2A	2	85539168	85545281	1	methionine adenosyltransferase 2A [Source:HGNC Symbol;Acc:HGNC:6904]
ENSG00000168936	-0.251941	6.84563	0.514083	0.901101	TMEM129	4	1715952	1721358	-1	transmembrane protein 129, E3 ubiquitin ligase [Source:HGNC Symbol;Acc:HGNC:25137]
ENSG00000168993	-0.783126	6.61562	0.190554	0.901101	CPLX1	4	784957	826129	-1	complexin 1 [Source:HGNC Symbol;Acc:HGNC:2309]
ENSG00000169021	0.2547	7.03172	0.430437	0.901101	UQCRFS1	19	29205320	29213151	-1	ubiquinol-cytochrome c reductase, Rieske iron-sulfur polypeptide 1 [Source:HGNC Symbol;Acc:HGNC:12587]
ENSG00000169035	0.550971	7.20164	0.101479	0.901101	KLK7	19	50976468	50984099	-1	kallikrein related peptidase 7 [Source:HGNC Symbol;Acc:HGNC:6368]
ENSG00000169045	0.955408	8.16924	0.191049	0.901101	HNRNPH1	5	179614178	179634784	-1	heterogeneous nuclear ribonucleoprotein H1 [Source:HGNC Symbol;Acc:HGNC:5041]
ENSG00000169093	-0.495939	7.21118	0.179748	0.901101	ASMTL	X	1403139	1453762	-1	acetylserotonin O-methyltransferase like [Source:HGNC Symbol;Acc:HGNC:751]
ENSG00000169100	-0.419418	10.3802	0.312697	0.901101	SLC25A6	X	1386152	1392113	-1	solute carrier family 25 member 6 [Source:HGNC Symbol;Acc:HGNC:10992]
ENSG00000169174	-0.56484	6.93326	0.155073	0.901101	PCSK9	1	55039447	55064852	1	proprotein convertase subtilisin/kexin type 9 [Source:HGNC Symbol;Acc:HGNC:20001]
ENSG00000169180	0.255546	7.80375	0.457882	0.901101	XPO6	16	28097976	28211965	-1	exportin 6 [Source:HGNC Symbol;Acc:HGNC:19733]
ENSG00000169221	-0.671422	7.65433	0.158115	0.901101	TBC1D10B	16	30357102	30370494	-1	TBC1 domain family member 10B [Source:HGNC Symbol;Acc:HGNC:24510]
ENSG00000169398	0.479392	6.98807	0.468047	0.901101	PTK2	8	140657900	141002216	-1	protein tyrosine kinase 2 [Source:HGNC Symbol;Acc:HGNC:9611]
ENSG00000169504	0.596847	6.87178	0.466228	0.901101	CLIC4	1	24745382	24844321	1	chloride intracellular channel 4 [Source:HGNC Symbol;Acc:HGNC:13518]
ENSG00000169567	0.414276	7.0285	0.185674	0.901101	HINT1	5	131155383	131224468	-1	histidine triad nucleotide binding protein 1 [Source:HGNC Symbol;Acc:HGNC:4912]
ENSG00000169692	-0.54186	7.59977	0.21958	0.901101	AGPAT2	9	136673143	136687457	-1	1-acylglycerol-3-phosphate O-acyltransferase 2 [Source:HGNC Symbol;Acc:HGNC:325]
ENSG00000169710	-0.578425	12.1742	0.308486	0.901101	FASN	17	82078338	82098294	-1	fatty acid synthase [Source:HGNC Symbol;Acc:HGNC:3594]
ENSG00000169714	0.698174	8.7003	0.25524	0.901101	CNBP	3	129167827	129183922	-1	CCHC-type zinc finger nucleic acid binding protein [Source:HGNC Symbol;Acc:HGNC:13164]
ENSG00000169715	0.372535	7.13458	0.307525	0.901101	MT1E	16	56625475	56627112	1	metallothionein 1E [Source:HGNC Symbol;Acc:HGNC:7397]
ENSG00000169738	-0.463954	8.49349	0.422268	0.901101	DCXR	17	82035136	82037709	-1	dicarbonyl and L-xylulose reductase [Source:HGNC Symbol;Acc:HGNC:18985]
ENSG00000169813	0.547627	8.21812	0.177602	0.901101	HNRNPF	10	43385617	43409166	-1	heterogeneous nuclear ribonucleoprotein F [Source:HGNC Symbol;Acc:HGNC:5039]
ENSG00000170027	0.678025	8.03366	0.107904	0.901101	YWHAG	7	76326799	76358991	-1	tyrosine 3-monooxygenase/tryptophan 5-monooxygenase activation protein gamma [Source:HGNC Symbol;Acc:HGNC:12852]
ENSG00000170144	0.742845	8.45768	0.134964	0.901101	HNRNPA3	2	177212563	177223958	1	heterogeneous nuclear ribonucleoprotein A3 [Source:HGNC Symbol;Acc:HGNC:24941]
ENSG00000170248	0.536646	6.93605	0.321711	0.901101	PDCD6IP	3	33798571	33869707	1	programmed cell death 6 interacting protein [Source:HGNC Symbol;Acc:HGNC:8766]
ENSG00000170348	0.646654	7.70628	0.259206	0.901101	TMED10	14	75131469	75176612	-1	transmembrane p24 trafficking protein 10 [Source:HGNC Symbol;Acc:HGNC:16998]
ENSG00000170604	-0.637708	8.10744	0.290245	0.901101	IRF2BP1	19	45883608	45886141	-1	interferon regulatory factor 2 binding protein 1 [Source:HGNC Symbol;Acc:HGNC:21728]
ENSG00000170606	0.776612	7.93258	0.149227	0.901101	HSPA4	5	133052013	133106449	1	heat shock protein family A (Hsp70) member 4 [Source:HGNC Symbol;Acc:HGNC:5237]
ENSG00000170638	-0.29056	8.11614	0.408764	0.901101	TRABD	22	50185913	50199598	1	TraB domain containing [Source:HGNC Symbol;Acc:HGNC:28805]
ENSG00000170759	0.844855	7.00166	0.342265	0.901101	KIF5B	10	32009015	32056425	-1	kinesin family member 5B [Source:HGNC Symbol;Acc:HGNC:6324]
ENSG00000170892	-0.293419	7.53695	0.516408	0.901101	TSEN34	19	54189938	54194536	1	tRNA splicing endonuclease subunit 34 [Source:HGNC Symbol;Acc:HGNC:15506]
ENSG00000171159	-0.630709	7.69105	0.209184	0.901101	C9orf16	9	128160265	128163924	1	chromosome 9 open reading frame 16 [Source:HGNC Symbol;Acc:HGNC:17823]
ENSG00000171223	-0.527984	8.52621	0.127622	0.901101	JUNB	19	12791486	12793315	1	JunB proto-oncogene, AP-1 transcription factor subunit [Source:HGNC Symbol;Acc:HGNC:6205]
ENSG00000171298	-0.610118	10.009	0.101238	0.901101	GAA	17	80101556	80119881	1	glucosidase alpha, acid [Source:HGNC Symbol;Acc:HGNC:4065]
ENSG00000171490	0.674162	7.94635	0.225996	0.901101	RSL1D1	16	11833850	11851580	-1	ribosomal L1 domain containing 1 [Source:HGNC Symbol;Acc:HGNC:24534]
ENSG00000171530	0.431556	7.04688	0.259194	0.901101	TBCA	5	77691166	77868780	-1	tubulin folding cofactor A [Source:HGNC Symbol;Acc:HGNC:11579]
ENSG00000171848	0.48192	7.09113	0.190314	0.901101	RRM2	2	10120698	10211725	1	ribonucleotide reductase regulatory subunit M2 [Source:HGNC Symbol;Acc:HGNC:10452]
ENSG00000171853	-0.678271	6.94463	0.150194	0.901101	TRAPPC12	2	3379675	3485094	1	trafficking protein particle complex 12 [Source:HGNC Symbol;Acc:HGNC:24284]
ENSG00000171863	0.288274	9.32725	0.425588	0.901101	RPS7	2	3575260	3580920	1	ribosomal protein S7 [Source:HGNC Symbol;Acc:HGNC:10440]
ENSG00000171867	0.682593	7.07309	0.330793	0.901101	PRNP	20	4686350	4701590	1	prion protein [Source:HGNC Symbol;Acc:HGNC:9449]
ENSG00000171992	-0.794793	6.96012	0.0565912	0.901101	SYNPO	5	150601080	150659207	1	synaptopodin [Source:HGNC Symbol;Acc:HGNC:30672]
ENSG00000172115	0.65723	7.91605	0.165828	0.901101	CYCS	7	25118656	25125260	-1	cytochrome c, somatic [Source:HGNC Symbol;Acc:HGNC:19986]
ENSG00000172216	-0.491636	8.34822	0.399646	0.901101	CEBPB	20	50190830	50192668	1	CCAAT enhancer binding protein beta [Source:HGNC Symbol;Acc:HGNC:1834]
ENSG00000172354	-0.45788	9.05636	0.354021	0.901101	GNB2	7	100673567	100679174	1	G protein subunit beta 2 [Source:HGNC Symbol;Acc:HGNC:4398]
ENSG00000172534	-0.240589	7.87603	0.449274	0.901101	HCFC1	X	153947557	153971818	-1	host cell factor C1 [Source:HGNC Symbol;Acc:HGNC:4839]
ENSG00000172725	-0.452722	8.436	0.385392	0.901101	CORO1B	11	67435510	67443821	-1	coronin 1B [Source:HGNC Symbol;Acc:HGNC:2253]
ENSG00000172809	-0.25177	8.82436	0.492291	0.901101	RPL38	17	74203582	74210655	1	ribosomal protein L38 [Source:HGNC Symbol;Acc:HGNC:10349]
ENSG00000172819	-0.238641	6.97713	0.493389	0.901101	RARG	12	53210567	53232980	-1	retinoic acid receptor gamma [Source:HGNC Symbol;Acc:HGNC:9866]
ENSG00000172830	-0.283808	6.96659	0.398179	0.901101	SSH3	11	67303478	67312607	1	slingshot protein phosphatase 3 [Source:HGNC Symbol;Acc:HGNC:30581]
ENSG00000172889	-0.998156	8.12372	0.0959785	0.901101	EGFL7	9	136658856	136672678	1	EGF like domain multiple 7 [Source:HGNC Symbol;Acc:HGNC:20594]
ENSG00000172893	-0.269923	7.93741	0.502711	0.901101	DHCR7	11	71428193	71452868	-1	7-dehydrocholesterol reductase [Source:HGNC Symbol;Acc:HGNC:2860]
ENSG00000173020	-0.256361	8.31516	0.419488	0.901101	GRK2	11	67266473	67286556	1	G protein-coupled receptor kinase 2 [Source:HGNC Symbol;Acc:HGNC:289]
ENSG00000173039	-0.267251	7.52405	0.431316	0.901101	RELA	11	65653597	65663090	-1	RELA proto-oncogene, NF-kB subunit [Source:HGNC Symbol;Acc:HGNC:9955]
ENSG00000173153	-0.333204	7.5141	0.299132	0.901101	ESRRA	11	64305497	64316743	1	estrogen related receptor alpha [Source:HGNC Symbol;Acc:HGNC:3471]
ENSG00000173207	0.369346	6.82269	0.370409	0.901101	CKS1B	1	154974653	154979251	1	CDC28 protein kinase regulatory subunit 1B [Source:HGNC Symbol;Acc:HGNC:19083]
ENSG00000173272	-0.345851	7.67162	0.456183	0.901101	MZT2A	2	131464900	131492743	-1	mitotic spindle organizing protein 2A [Source:HGNC Symbol;Acc:HGNC:33187]
ENSG00000173327	-0.443615	8.14191	0.347375	0.901101	MAP3K11	11	65597756	65615382	-1	mitogen-activated protein kinase kinase kinase 11 [Source:HGNC Symbol;Acc:HGNC:6850]
ENSG00000173402	0.279781	7.58097	0.442613	0.901101	DAG1	3	49468703	49535618	1	dystroglycan 1 [Source:HGNC Symbol;Acc:HGNC:2666]
ENSG00000173473	0.464421	7.78677	0.325434	0.901101	SMARCC1	3	47585269	47782106	-1	SWI/SNF related, matrix associated, actin dependent regulator of chromatin subfamily c member 1 [Source:HGNC Symbol;Acc:HGNC:11104]
ENSG00000173530	0.715659	6.69277	0.262455	0.901101	TNFRSF10D	8	23135588	23164027	-1	TNF receptor superfamily member 10d [Source:HGNC Symbol;Acc:HGNC:11907]
ENSG00000173575	0.63635	6.51267	0.504114	0.901101	CHD2	15	92900189	93027996	1	chromodomain helicase DNA binding protein 2 [Source:HGNC Symbol;Acc:HGNC:1917]
ENSG00000173621	-0.633881	7.33934	0.200053	0.901101	LRFN4	11	66856647	66860475	1	leucine rich repeat and fibronectin type III domain containing 4 [Source:HGNC Symbol;Acc:HGNC:28456]
ENSG00000173660	0.421049	7.37748	0.266743	0.901101	UQCRH	1	46303698	46316776	1	ubiquinol-cytochrome c reductase hinge protein [Source:HGNC Symbol;Acc:HGNC:12590]
ENSG00000173692	0.691912	6.89195	0.153888	0.901101	PSMD1	2	231056845	231173116	1	proteasome 26S subunit, non-ATPase 1 [Source:HGNC Symbol;Acc:HGNC:9554]
ENSG00000173726	0.666385	8.16526	0.242282	0.901101	TOMM20	1	235109341	235128837	-1	translocase of outer mitochondrial membrane 20 [Source:HGNC Symbol;Acc:HGNC:20947]
ENSG00000173801	-0.431988	10.2343	0.347585	0.901101	JUP	17	41754604	41786931	-1	junction plakoglobin [Source:HGNC Symbol;Acc:HGNC:6207]
ENSG00000173846	-0.49274	7.64874	0.211634	0.901101	PLK3	1	44800377	44805990	1	polo like kinase 3 [Source:HGNC Symbol;Acc:HGNC:2154]
ENSG00000174177	-0.630208	7.09919	0.216053	0.901101	CTU2	16	88706483	88715396	1	cytosolic thiouridylase subunit 2 [Source:HGNC Symbol;Acc:HGNC:28005]
ENSG00000174238	0.324628	7.07892	0.406122	0.901101	PITPNA	17	1517718	1562792	-1	phosphatidylinositol transfer protein alpha [Source:HGNC Symbol;Acc:HGNC:9001]
ENSG00000174243	0.286677	6.89741	0.457003	0.901101	DDX23	12	48829756	48852842	-1	DEAD-box helicase 23 [Source:HGNC Symbol;Acc:HGNC:17347]
ENSG00000174437	0.465518	8.64119	0.306664	0.901101	ATP2A2	12	110280756	110351093	1	ATPase sarcoplasmic/endoplasmic reticulum Ca2+ transporting 2 [Source:HGNC Symbol;Acc:HGNC:812]
ENSG00000174574	0.545545	6.92485	0.276584	0.901101	AKIRIN1	1	38991276	39006059	1	akirin 1 [Source:HGNC Symbol;Acc:HGNC:25744]
ENSG00000174780	0.72536	7.01016	0.279676	0.901101	SRP72	4	56467617	56503681	1	signal recognition particle 72 [Source:HGNC Symbol;Acc:HGNC:11303]
ENSG00000174791	-0.617471	7.49436	0.129015	0.901101	RIN1	11	66330241	66336840	-1	Ras and Rab interactor 1 [Source:HGNC Symbol;Acc:HGNC:18749]
ENSG00000174903	-0.375795	7.55238	0.377845	0.901101	RAB1B	11	66268590	66277492	1	RAB1B, member RAS oncogene family [Source:HGNC Symbol;Acc:HGNC:18370]
ENSG00000174915	-0.272862	6.82235	0.46338	0.901101	PTDSS2	11	448268	491399	1	phosphatidylserine synthase 2 [Source:HGNC Symbol;Acc:HGNC:15463]
ENSG00000174938	-0.560543	7.921	0.0772576	0.901101	SEZ6L2	16	29871159	29899547	-1	seizure related 6 homolog like 2 [Source:HGNC Symbol;Acc:HGNC:30844]
ENSG00000174996	-0.323056	7.70686	0.34067	0.901101	KLC2	11	66257294	66267860	1	kinesin light chain 2 [Source:HGNC Symbol;Acc:HGNC:20716]
ENSG00000175029	0.494756	7.11164	0.323641	0.901101	CTBP2	10	124984317	125161170	-1	C-terminal binding protein 2 [Source:HGNC Symbol;Acc:HGNC:2495]
ENSG00000175115	-0.326123	7.11667	0.306875	0.901101	PACS1	11	66070272	66244744	1	phosphofurin acidic cluster sorting protein 1 [Source:HGNC Symbol;Acc:HGNC:30032]
ENSG00000175216	0.520332	7.28225	0.347688	0.901101	CKAP5	11	46743048	46846308	-1	cytoskeleton associated protein 5 [Source:HGNC Symbol;Acc:HGNC:28959]
ENSG00000175221	-0.626352	7.901	0.305005	0.901101	MED16	19	867630	893218	-1	mediator complex subunit 16 [Source:HGNC Symbol;Acc:HGNC:17556]
ENSG00000175274	-0.409848	6.89197	0.251097	0.901101	TP53I11	11	44885903	44951306	-1	tumor protein p53 inducible protein 11 [Source:HGNC Symbol;Acc:HGNC:16842]
ENSG00000175315	-0.283211	6.76943	0.51655	0.901101	CST6	11	66012008	66013505	1	cystatin E/M [Source:HGNC Symbol;Acc:HGNC:2478]
ENSG00000175550	-0.265299	8.68856	0.474454	0.901101	DRAP1	11	65919274	65921563	1	DR1 associated protein 1 [Source:HGNC Symbol;Acc:HGNC:3019]
ENSG00000175582	0.803861	6.64404	0.227465	0.901101	RAB6A	11	73675638	73761137	-1	RAB6A, member RAS oncogene family [Source:HGNC Symbol;Acc:HGNC:9786]
ENSG00000175592	-0.370694	8.75468	0.466693	0.901101	FOSL1	11	65892049	65900573	-1	FOS like 1, AP-1 transcription factor subunit [Source:HGNC Symbol;Acc:HGNC:13718]
ENSG00000175602	-0.6991	8.93777	0.183568	0.901101	CCDC85B	11	65890673	65891635	1	coiled-coil domain containing 85B [Source:HGNC Symbol;Acc:HGNC:24926]
ENSG00000175756	-0.346564	8.13041	0.439186	0.901101	AURKAIP1	1	1373730	1375495	-1	aurora kinase A interacting protein 1 [Source:HGNC Symbol;Acc:HGNC:24114]
ENSG00000175793	-0.365312	10.4198	0.47829	0.901101	SFN	1	26863149	26864456	1	stratifin [Source:HGNC Symbol;Acc:HGNC:10773]
ENSG00000175866	-0.294931	7.66461	0.431367	0.901101	BAIAP2	17	81035122	81117432	1	BAR/IMD domain containing adaptor protein 2 [Source:HGNC Symbol;Acc:HGNC:947]
ENSG00000176022	-0.314819	6.86111	0.505515	0.901101	B3GALT6	1	1232237	1235041	1	beta-1,3-galactosyltransferase 6 [Source:HGNC Symbol;Acc:HGNC:17978]
ENSG00000176101	-0.40962	7.40054	0.439581	0.901101	SSNA1	9	137188660	137190370	1	SS nuclear autoantigen 1 [Source:HGNC Symbol;Acc:HGNC:11321]
ENSG00000176407	0.407131	6.60766	0.389191	0.901101	KCMF1	2	84971093	85059472	1	potassium channel modulatory factor 1 [Source:HGNC Symbol;Acc:HGNC:20589]
ENSG00000176715	-0.261432	6.98579	0.47543	0.901101	ACSF3	16	89088375	89164121	1	acyl-CoA synthetase family member 3 [Source:HGNC Symbol;Acc:HGNC:27288]
ENSG00000176720	-0.61716	7.26031	0.164545	0.901101	BOK	2	241551424	241574131	1	BCL2 family apoptosis regulator BOK [Source:HGNC Symbol;Acc:HGNC:1087]
ENSG00000176845	-0.431307	7.08123	0.227824	0.901101	METRNL	17	83079609	83095122	1	meteorin like, glial cell differentiation regulator [Source:HGNC Symbol;Acc:HGNC:27584]
ENSG00000176946	-0.301491	7.40188	0.412011	0.901101	THAP4	2	241584405	241637158	-1	THAP domain containing 4 [Source:HGNC Symbol;Acc:HGNC:23187]
ENSG00000176978	-0.429747	8.90506	0.268569	0.901101	DPP7	9	137110546	137115177	-1	dipeptidyl peptidase 7 [Source:HGNC Symbol;Acc:HGNC:14892]
ENSG00000177303	-0.572007	7.01024	0.134803	0.901101	CASKIN2	17	75500261	75515537	-1	CASK interacting protein 2 [Source:HGNC Symbol;Acc:HGNC:18200]
ENSG00000177426	0.495495	7.62933	0.228958	0.901101	TGIF1	18	3411608	3459978	1	TGFB induced factor homeobox 1 [Source:HGNC Symbol;Acc:HGNC:11776]
ENSG00000177600	-0.225914	9.87523	0.488568	0.901101	RPLP2	11	809965	812880	1	ribosomal protein lateral stalk subunit P2 [Source:HGNC Symbol;Acc:HGNC:10377]
ENSG00000177666	-0.497532	8.02758	0.289638	0.901101	PNPLA2	11	818914	825573	1	patatin like phospholipase domain containing 2 [Source:HGNC Symbol;Acc:HGNC:30802]
ENSG00000177706	-0.972098	6.7103	0.0697611	0.901101	FAM20C	7	192571	260772	1	FAM20C golgi associated secretory pathway kinase [Source:HGNC Symbol;Acc:HGNC:22140]
ENSG00000177728	-0.268402	7.04188	0.403463	0.901101	TMEM94	17	75441159	75500452	1	transmembrane protein 94 [Source:HGNC Symbol;Acc:HGNC:28983]
ENSG00000177732	-0.329263	8.38256	0.490911	0.901101	SOX12	20	325595	330224	1	SRY-box transcription factor 12 [Source:HGNC Symbol;Acc:HGNC:11198]
ENSG00000177733	0.292134	8.67467	0.388341	0.901101	HNRNPA0	5	137745651	137754363	-1	heterogeneous nuclear ribonucleoprotein A0 [Source:HGNC Symbol;Acc:HGNC:5030]
ENSG00000177830	-0.3522	7.1779	0.314317	0.901101	CHID1	11	867859	915058	-1	chitinase domain containing 1 [Source:HGNC Symbol;Acc:HGNC:28474]
ENSG00000177879	0.563235	8.51077	0.329721	0.901101	AP3S1	5	115841592	115914081	1	adaptor related protein complex 3 subunit sigma 1 [Source:HGNC Symbol;Acc:HGNC:2013]
ENSG00000177885	0.254039	8.08661	0.477135	0.901101	GRB2	17	75318076	75405709	-1	growth factor receptor bound protein 2 [Source:HGNC Symbol;Acc:HGNC:4566]
ENSG00000177889	0.811597	6.66818	0.154065	0.901101	UBE2N	12	93405673	93441947	-1	ubiquitin conjugating enzyme E2 N [Source:HGNC Symbol;Acc:HGNC:12492]
ENSG00000178531	-0.668225	7.75708	0.409556	0.901101	CTXN1	19	7924491	7926135	-1	cortexin 1 [Source:HGNC Symbol;Acc:HGNC:31108]
ENSG00000178605	-0.366376	6.87213	0.419375	0.901101	GTPBP6	X	304529	318819	-1	GTP binding protein 6 (putative) [Source:HGNC Symbol;Acc:HGNC:30189]
ENSG00000178814	-0.518036	7.76123	0.257932	0.901101	OPLAH	8	144051266	144063965	-1	5-oxoprolinase, ATP-hydrolysing [Source:HGNC Symbol;Acc:HGNC:8149]
ENSG00000178927	-0.25555	7.29455	0.441476	0.901101	CYBC1	17	82442586	82450829	-1	cytochrome b-245 chaperone 1 [Source:HGNC Symbol;Acc:HGNC:28672]
ENSG00000178950	-0.260325	8.26502	0.399813	0.901101	GAK	4	849276	932373	-1	cyclin G associated kinase [Source:HGNC Symbol;Acc:HGNC:4113]
ENSG00000179010	0.55304	8.66483	0.124866	0.901101	MRFAP1	4	6640091	6642745	1	Morf4 family associated protein 1 [Source:HGNC Symbol;Acc:HGNC:24549]
ENSG00000179091	-0.461702	9.94407	0.318095	0.901101	CYC1	8	144095039	144097525	1	cytochrome c1 [Source:HGNC Symbol;Acc:HGNC:2579]
ENSG00000179094	-0.741656	7.1801	0.0918219	0.901101	PER1	17	8140472	8156506	-1	period circadian regulator 1 [Source:HGNC Symbol;Acc:HGNC:8845]
ENSG00000179115	-0.328997	8.62909	0.454816	0.901101	FARSA	19	12922479	12934037	-1	phenylalanyl-tRNA synthetase subunit alpha [Source:HGNC Symbol;Acc:HGNC:3592]
ENSG00000179195	0.968163	6.99491	0.21686	0.901101	ZNF664	12	123971845	124015439	1	zinc finger protein 664 [Source:HGNC Symbol;Acc:HGNC:25406]
ENSG00000179222	-0.244298	7.63196	0.444221	0.901101	MAGED1	X	51803007	51902354	1	MAGE family member D1 [Source:HGNC Symbol;Acc:HGNC:6813]
ENSG00000179262	-0.617919	8.37061	0.114493	0.901101	RAD23A	19	12945855	12953642	1	RAD23 homolog A, nucleotide excision repair protein [Source:HGNC Symbol;Acc:HGNC:9812]
ENSG00000179295	0.825647	7.67405	0.30893	0.901101	PTPN11	12	112418351	112509918	1	protein tyrosine phosphatase non-receptor type 11 [Source:HGNC Symbol;Acc:HGNC:9644]
ENSG00000179364	-0.320552	7.51775	0.306534	0.901101	PACS2	14	105300563	105398147	1	phosphofurin acidic cluster sorting protein 2 [Source:HGNC Symbol;Acc:HGNC:23794]
ENSG00000179403	-0.669551	8.23868	0.396173	0.901101	VWA1	1	1434861	1442882	1	von Willebrand factor A domain containing 1 [Source:HGNC Symbol;Acc:HGNC:30910]
ENSG00000179526	-0.397751	7.17516	0.256887	0.901101	SHARPIN	8	144098633	144108124	-1	SHANK associated RH domain interactor [Source:HGNC Symbol;Acc:HGNC:25321]
ENSG00000179588	-0.916793	7.63146	0.234595	0.901101	ZFPM1	16	88453280	88537031	1	zinc finger protein, FOG family member 1 [Source:HGNC Symbol;Acc:HGNC:19762]
ENSG00000179604	-0.287272	7.20052	0.331758	0.901101	CDC42EP4	17	73283624	73312005	-1	CDC42 effector protein 4 [Source:HGNC Symbol;Acc:HGNC:17147]
ENSG00000179632	-0.399259	8.41593	0.348909	0.901101	MAF1	8	144104461	144107611	1	MAF1 homolog, negative regulator of RNA polymerase III [Source:HGNC Symbol;Acc:HGNC:24966]
ENSG00000179832	-0.411369	8.00644	0.170292	0.901101	MROH1	8	144148016	144261940	1	maestro heat like repeat family member 1 [Source:HGNC Symbol;Acc:HGNC:26958]
ENSG00000179833	0.48735	6.6848	0.496661	0.901101	SERTAD2	2	64631621	64751005	-1	SERTA domain containing 2 [Source:HGNC Symbol;Acc:HGNC:30784]
ENSG00000179862	-1.50918	6.35016	0.0331963	0.901101	CITED4	1	40861054	40862363	-1	Cbp/p300 interacting transactivator with Glu/Asp rich carboxy-terminal domain 4 [Source:HGNC Symbol;Acc:HGNC:18696]
ENSG00000179886	-0.673343	6.92107	0.343885	0.901101	TIGD5	8	143597831	143603224	1	tigger transposable element derived 5 [Source:HGNC Symbol;Acc:HGNC:18336]
ENSG00000179918	0.497875	6.83454	0.424953	0.901101	SEPHS2	16	30443631	30445874	-1	selenophosphate synthetase 2 [Source:HGNC Symbol;Acc:HGNC:19686]
ENSG00000180448	-0.262519	6.87588	0.466922	0.901101	ARHGAP45	19	1065923	1086628	1	Rho GTPase activating protein 45 [Source:HGNC Symbol;Acc:HGNC:17102]
ENSG00000180817	0.714908	7.4403	0.0603525	0.901101	PPA1	10	70202835	70233911	-1	inorganic pyrophosphatase 1 [Source:HGNC Symbol;Acc:HGNC:9226]
ENSG00000180900	-0.591633	10.2638	0.234297	0.901101	SCRIB	8	143790920	143815773	-1	scribble planar cell polarity protein [Source:HGNC Symbol;Acc:HGNC:30377]
ENSG00000181019	0.380055	8.09882	0.198209	0.901101	NQO1	16	69706996	69726668	-1	NAD(P)H quinone dehydrogenase 1 [Source:HGNC Symbol;Acc:HGNC:2874]
ENSG00000181163	0.828611	9.97668	0.138723	0.901101	NPM1	5	171387116	171411810	1	nucleophosmin 1 [Source:HGNC Symbol;Acc:HGNC:7910]
ENSG00000181467	0.506178	7.20694	0.328997	0.901101	RAP2B	3	153162226	153170627	1	RAP2B, member of RAS oncogene family [Source:HGNC Symbol;Acc:HGNC:9862]
ENSG00000181588	-0.697435	9.06676	0.31781	0.901101	MEX3D	19	1554669	1568058	-1	mex-3 RNA binding family member D [Source:HGNC Symbol;Acc:HGNC:16734]
ENSG00000181610	0.465625	6.9337	0.171222	0.901101	MRPS23	17	57834781	57850056	-1	mitochondrial ribosomal protein S23 [Source:HGNC Symbol;Acc:HGNC:14509]
ENSG00000181649	-0.75627	10.1576	0.188021	0.901101	PHLDA2	11	2928273	2929420	-1	pleckstrin homology like domain family A member 2 [Source:HGNC Symbol;Acc:HGNC:12385]
ENSG00000182022	0.643134	6.55255	0.433863	0.901101	CHST15	10	124007668	124093598	-1	carbohydrate sulfotransferase 15 [Source:HGNC Symbol;Acc:HGNC:18137]
ENSG00000182149	0.290406	6.97925	0.491612	0.901101	IST1	16	71845996	71931199	1	IST1 factor associated with ESCRT-III [Source:HGNC Symbol;Acc:HGNC:28977]
ENSG00000182154	-0.338014	7.43685	0.425772	0.901101	MRPL41	9	137551879	137552555	1	mitochondrial ribosomal protein L41 [Source:HGNC Symbol;Acc:HGNC:14492]
ENSG00000182173	-0.239116	7.02281	0.47124	0.901101	TSEN54	17	75516060	75524735	1	tRNA splicing endonuclease subunit 54 [Source:HGNC Symbol;Acc:HGNC:27561]
ENSG00000182199	-0.303924	8.8599	0.397033	0.901101	SHMT2	12	57229573	57234935	1	serine hydroxymethyltransferase 2 [Source:HGNC Symbol;Acc:HGNC:10852]
ENSG00000182481	0.58512	8.11881	0.12467	0.901101	KPNA2	17	68035636	68047364	1	karyopherin subunit alpha 2 [Source:HGNC Symbol;Acc:HGNC:6395]
ENSG00000182718	0.556847	10.7666	0.0792745	0.901101	ANXA2	15	60347134	60402883	-1	annexin A2 [Source:HGNC Symbol;Acc:HGNC:537]
ENSG00000182809	-0.862481	7.41537	0.0741467	0.901101	CRIP2	14	105472962	105480162	1	cysteine rich protein 2 [Source:HGNC Symbol;Acc:HGNC:2361]
ENSG00000182871	-0.557465	9.13427	0.112926	0.901101	COL18A1	21	45405165	45513720	1	collagen type XVIII alpha 1 chain [Source:HGNC Symbol;Acc:HGNC:2195]
ENSG00000183010	-0.481461	9.45916	0.292184	0.901101	PYCR1	17	81932384	81942412	-1	pyrroline-5-carboxylate reductase 1 [Source:HGNC Symbol;Acc:HGNC:9721]
ENSG00000183207	-0.414401	9.15139	0.385867	0.901101	RUVBL2	19	48993562	49015970	1	RuvB like AAA ATPase 2 [Source:HGNC Symbol;Acc:HGNC:10475]
ENSG00000183255	0.360627	7.57134	0.29503	0.901101	PTTG1IP	21	44849585	44873903	-1	PTTG1 interacting protein [Source:HGNC Symbol;Acc:HGNC:13524]
ENSG00000183283	0.372115	7.03443	0.309195	0.901101	DAZAP2	12	51238724	51271362	1	DAZ associated protein 2 [Source:HGNC Symbol;Acc:HGNC:2684]
ENSG00000183291	0.785808	7.03232	0.115341	0.901101	SELENOF	1	86862445	86914424	-1	selenoprotein F [Source:HGNC Symbol;Acc:HGNC:17705]
ENSG00000183751	-0.640131	8.19229	0.162847	0.901101	TBL3	16	1972053	1982929	1	transducin beta like 3 [Source:HGNC Symbol;Acc:HGNC:11587]
ENSG00000183963	-0.216265	7.75682	0.515389	0.901101	SMTN	22	31064105	31104757	1	smoothelin [Source:HGNC Symbol;Acc:HGNC:11126]
ENSG00000183971	-1.01125	9.56469	0.256615	0.901101	NPW	16	2009926	2020755	1	neuropeptide W [Source:HGNC Symbol;Acc:HGNC:30509]
ENSG00000184007	0.426782	7.84613	0.402595	0.901101	PTP4A2	1	31906421	31944856	-1	protein tyrosine phosphatase 4A2 [Source:HGNC Symbol;Acc:HGNC:9635]
ENSG00000184009	-0.436202	13.5177	0.289933	0.901101	ACTG1	17	81509971	81523847	-1	actin gamma 1 [Source:HGNC Symbol;Acc:HGNC:144]
ENSG00000184160	-0.626765	7.24532	0.17047	0.901101	ADRA2C	4	3766348	3768526	1	adrenoceptor alpha 2C [Source:HGNC Symbol;Acc:HGNC:283]
ENSG00000184216	-0.438518	8.90659	0.369931	0.901101	IRAK1	X	154010506	154019902	-1	interleukin 1 receptor associated kinase 1 [Source:HGNC Symbol;Acc:HGNC:6112]
ENSG00000184232	-0.362711	6.99264	0.263965	0.901101	OAF	11	120211032	120230334	1	out at first homolog [Source:HGNC Symbol;Acc:HGNC:28752]
ENSG00000184254	0.813871	7.43852	0.14053	0.901101	ALDH1A3	15	100877714	100916626	1	aldehyde dehydrogenase 1 family member A3 [Source:HGNC Symbol;Acc:HGNC:409]
ENSG00000184281	-0.331429	6.72641	0.450755	0.901101	TSSC4	11	2400488	2403878	1	tumor suppressing subtransferable candidate 4 [Source:HGNC Symbol;Acc:HGNC:12386]
ENSG00000184363	-0.478442	8.95774	0.260361	0.901101	PKP3	11	392614	404908	1	plakophilin 3 [Source:HGNC Symbol;Acc:HGNC:9025]
ENSG00000184432	0.762385	7.16172	0.211925	0.901101	COPB2	3	139353946	139389736	-1	COPI coat complex subunit beta 2 [Source:HGNC Symbol;Acc:HGNC:2232]
ENSG00000184575	0.924502	7.30799	0.31618	0.901101	XPOT	12	64404392	64451125	1	exportin for tRNA [Source:HGNC Symbol;Acc:HGNC:12826]
ENSG00000184640	-0.36071	10.0897	0.326249	0.901101	SEPTIN9	17	77280569	77500596	1	septin 9 [Source:HGNC Symbol;Acc:HGNC:7323]
ENSG00000184787	0.534585	7.05566	0.36753	0.901101	UBE2G2	21	44768580	44801826	-1	ubiquitin conjugating enzyme E2 G2 [Source:HGNC Symbol;Acc:HGNC:12483]
ENSG00000184897	-0.680971	7.55244	0.210445	0.901101	H1-10	3	129314771	129316286	-1	H1.10 linker histone [Source:HGNC Symbol;Acc:HGNC:4722]
ENSG00000184967	-0.388366	7.0323	0.487007	0.901101	NOC4L	12	132144457	132152473	1	nucleolar complex associated 4 homolog [Source:HGNC Symbol;Acc:HGNC:28461]
ENSG00000185033	-0.345956	7.84133	0.33876	0.901101	SEMA4B	15	90160604	90229679	1	semaphorin 4B [Source:HGNC Symbol;Acc:HGNC:10730]
ENSG00000185049	-0.464946	7.7081	0.181192	0.901101	NELFA	4	1982717	2041903	-1	negative elongation factor complex member A [Source:HGNC Symbol;Acc:HGNC:12768]
ENSG00000185088	0.82641	6.34833	0.206349	0.901101	RPS27L	15	63125872	63158021	-1	ribosomal protein S27 like [Source:HGNC Symbol;Acc:HGNC:18476]
ENSG00000185122	-0.411406	8.80368	0.343502	0.901101	HSF1	8	144291591	144314720	1	heat shock transcription factor 1 [Source:HGNC Symbol;Acc:HGNC:5224]
ENSG00000185201	-0.352615	7.3881	0.361254	0.901101	IFITM2	11	307631	315272	1	interferon induced transmembrane protein 2 [Source:HGNC Symbol;Acc:HGNC:5413]
ENSG00000185236	-0.407809	8.28818	0.416842	0.901101	RAB11B	19	8389981	8404434	1	RAB11B, member RAS oncogene family [Source:HGNC Symbol;Acc:HGNC:9761]
ENSG00000185340	-0.784727	7.83419	0.247535	0.901101	GAS2L1	22	29306582	29312785	1	growth arrest specific 2 like 1 [Source:HGNC Symbol;Acc:HGNC:16955]
ENSG00000185359	-0.316266	9.37013	0.471738	0.901101	HGS	17	81683326	81703138	1	hepatocyte growth factor-regulated tyrosine kinase substrate [Source:HGNC Symbol;Acc:HGNC:4897]
ENSG00000185504	-0.451434	7.75935	0.215467	0.901101	FAAP100	17	81539885	81553961	-1	FA core complex associated protein 100 [Source:HGNC Symbol;Acc:HGNC:26171]
ENSG00000185551	0.376671	7.46849	0.306075	0.901101	NR2F2	15	96325938	96340263	1	nuclear receptor subfamily 2 group F member 2 [Source:HGNC Symbol;Acc:HGNC:7976]
ENSG00000185651	0.256268	7.30108	0.453873	0.901101	UBE2L3	22	21549447	21624034	1	ubiquitin conjugating enzyme E2 L3 [Source:HGNC Symbol;Acc:HGNC:12488]
ENSG00000185787	0.65496	7.89083	0.208891	0.901101	MORF4L1	15	78810487	78898139	1	mortality factor 4 like 1 [Source:HGNC Symbol;Acc:HGNC:16989]
ENSG00000185803	-0.389013	8.1975	0.346436	0.901101	SLC52A2	8	144333957	144361286	1	solute carrier family 52 member 2 [Source:HGNC Symbol;Acc:HGNC:30224]
ENSG00000185896	0.3333	8.26901	0.260239	0.901101	LAMP1	13	113297239	113323672	1	lysosomal associated membrane protein 1 [Source:HGNC Symbol;Acc:HGNC:6499]
ENSG00000185950	-0.276137	6.95508	0.511037	0.901101	IRS2	13	109752695	109786583	-1	insulin receptor substrate 2 [Source:HGNC Symbol;Acc:HGNC:6126]
ENSG00000186111	-0.337464	7.30388	0.269549	0.901101	PIP5K1C	19	3630183	3700468	-1	phosphatidylinositol-4-phosphate 5-kinase type 1 gamma [Source:HGNC Symbol;Acc:HGNC:8996]
ENSG00000186174	-0.271315	8.53004	0.511359	0.901101	BCL9L	11	118893875	118925608	-1	BCL9 like [Source:HGNC Symbol;Acc:HGNC:23688]
ENSG00000186193	-0.32621	7.64344	0.482796	0.901101	SAPCD2	9	137062127	137070557	-1	suppressor APC domain containing 2 [Source:HGNC Symbol;Acc:HGNC:28055]
ENSG00000186298	0.861561	7.34606	0.114288	0.901101	PPP1CC	12	110719680	110742939	-1	protein phosphatase 1 catalytic subunit gamma [Source:HGNC Symbol;Acc:HGNC:9283]
ENSG00000186468	0.211542	8.77619	0.502967	0.901101	RPS23	5	82273320	82278396	-1	ribosomal protein S23 [Source:HGNC Symbol;Acc:HGNC:10410]
ENSG00000186591	0.529477	7.89348	0.389469	0.901101	UBE2H	7	129830732	129952960	-1	ubiquitin conjugating enzyme E2 H [Source:HGNC Symbol;Acc:HGNC:12484]
ENSG00000186716	-0.210395	7.19852	0.51517	0.901101	BCR	22	23179704	23318037	1	BCR activator of RhoGEF and GTPase [Source:HGNC Symbol;Acc:HGNC:1014]
ENSG00000186834	0.553745	7.19968	0.325773	0.901101	HEXIM1	17	45148475	45152099	1	HEXIM P-TEFb complex subunit 1 [Source:HGNC Symbol;Acc:HGNC:24953]
ENSG00000186891	-0.748441	7.45226	0.116016	0.901101	TNFRSF18	1	1203508	1206592	-1	TNF receptor superfamily member 18 [Source:HGNC Symbol;Acc:HGNC:11914]
ENSG00000187017	-0.544109	8.77105	0.278313	0.901101	ESPN	1	6424776	6461367	1	espin [Source:HGNC Symbol;Acc:HGNC:13281]
ENSG00000187109	0.668716	8.45819	0.206562	0.901101	NAP1L1	12	76036585	76084735	-1	nucleosome assembly protein 1 like 1 [Source:HGNC Symbol;Acc:HGNC:7637]
ENSG00000187446	0.400686	7.0334	0.314343	0.901101	CHP1	15	41230839	41281887	1	calcineurin like EF-hand protein 1 [Source:HGNC Symbol;Acc:HGNC:17433]
ENSG00000187514	0.348303	10.5762	0.409153	0.901101	PTMA	2	231706895	231713551	1	prothymosin alpha [Source:HGNC Symbol;Acc:HGNC:9623]
ENSG00000187555	0.625848	7.30988	0.247568	0.901101	USP7	16	8892097	8975328	-1	ubiquitin specific peptidase 7 [Source:HGNC Symbol;Acc:HGNC:12630]
ENSG00000187735	0.773234	6.99177	0.30977	0.901101	TCEA1	8	53966552	54022456	-1	transcription elongation factor A1 [Source:HGNC Symbol;Acc:HGNC:11612]
ENSG00000187840	-0.432962	8.12277	0.292722	0.901101	EIF4EBP1	8	38030534	38060365	1	eukaryotic translation initiation factor 4E binding protein 1 [Source:HGNC Symbol;Acc:HGNC:3288]
ENSG00000188290	-0.816911	8.53313	0.146998	0.901101	HES4	1	998962	1000172	-1	hes family bHLH transcription factor 4 [Source:HGNC Symbol;Acc:HGNC:24149]
ENSG00000188322	-0.555835	7.17608	0.127215	0.901101	SBK1	16	28259246	28323849	1	SH3 domain binding kinase 1 [Source:HGNC Symbol;Acc:HGNC:17699]
ENSG00000188483	-0.696745	9.83114	0.258964	0.901101	IER5L	9	129175552	129178261	-1	immediate early response 5 like [Source:HGNC Symbol;Acc:HGNC:23679]
ENSG00000188486	-0.565736	9.02425	0.399242	0.901101	H2AX	11	119093854	119095467	-1	H2A.X variant histone [Source:HGNC Symbol;Acc:HGNC:4739]
ENSG00000188522	-0.422526	7.21978	0.191264	0.901101	FAM83G	17	18968789	19004764	-1	family with sequence similarity 83 member G [Source:HGNC Symbol;Acc:HGNC:32554]
ENSG00000188612	0.544647	7.83363	0.161175	0.901101	SUMO2	17	75165586	75182959	-1	small ubiquitin like modifier 2 [Source:HGNC Symbol;Acc:HGNC:11125]
ENSG00000188910	-0.37675	7.51052	0.384419	0.901101	GJB3	1	34781214	34786369	1	gap junction protein beta 3 [Source:HGNC Symbol;Acc:HGNC:4285]
ENSG00000188976	-0.286318	9.2367	0.462475	0.901101	NOC2L	1	944203	959309	-1	NOC2 like nucleolar associated transcriptional repressor [Source:HGNC Symbol;Acc:HGNC:24517]
ENSG00000189143	-0.438796	9.36	0.206457	0.901101	CLDN4	7	73799542	73832693	1	claudin 4 [Source:HGNC Symbol;Acc:HGNC:2046]
ENSG00000189241	0.592897	6.65291	0.215416	0.901101	TSPYL1	6	116267760	116279930	-1	TSPY like 1 [Source:HGNC Symbol;Acc:HGNC:12382]
ENSG00000189403	0.956385	7.82205	0.102047	0.901101	HMGB1	13	30456704	30617597	-1	high mobility group box 1 [Source:HGNC Symbol;Acc:HGNC:4983]
ENSG00000196262	0.299974	10.2573	0.467324	0.901101	PPIA	7	44796680	44824564	1	peptidylprolyl isomerase A [Source:HGNC Symbol;Acc:HGNC:9253]
ENSG00000196305	0.585245	8.32352	0.231956	0.901101	IARS1	9	92210207	92293756	-1	isoleucyl-tRNA synthetase 1 [Source:HGNC Symbol;Acc:HGNC:5330]
ENSG00000196365	-0.345229	9.45618	0.413113	0.901101	LONP1	19	5691834	5720572	-1	lon peptidase 1, mitochondrial [Source:HGNC Symbol;Acc:HGNC:9479]
ENSG00000196396	0.406606	6.99541	0.272053	0.901101	PTPN1	20	50510321	50585241	1	protein tyrosine phosphatase non-receptor type 1 [Source:HGNC Symbol;Acc:HGNC:9642]
ENSG00000196411	-0.315173	8.03902	0.296336	0.901101	EPHB4	7	100802565	100827523	-1	EPH receptor B4 [Source:HGNC Symbol;Acc:HGNC:3395]
ENSG00000196498	-0.44058	9.49513	0.211658	0.901101	NCOR2	12	124324415	124567589	-1	nuclear receptor corepressor 2 [Source:HGNC Symbol;Acc:HGNC:7673]
ENSG00000196504	0.960075	6.72552	0.283955	0.901101	PRPF40A	2	152651593	152717997	-1	pre-mRNA processing factor 40 homolog A [Source:HGNC Symbol;Acc:HGNC:16463]
ENSG00000196531	0.234907	8.1962	0.496765	0.901101	NACA	12	56712305	56731628	-1	nascent polypeptide associated complex subunit alpha [Source:HGNC Symbol;Acc:HGNC:7629]
ENSG00000196557	-0.685637	7.9465	0.041346	0.901101	CACNA1H	16	1153106	1221771	1	calcium voltage-gated channel subunit alpha1 H [Source:HGNC Symbol;Acc:HGNC:1395]
ENSG00000196576	-0.235789	10.0102	0.446134	0.901101	PLXNB2	22	50274979	50307646	-1	plexin B2 [Source:HGNC Symbol;Acc:HGNC:9104]
ENSG00000196586	0.874113	6.59683	0.26678	0.901101	MYO6	6	75749192	75919537	1	myosin VI [Source:HGNC Symbol;Acc:HGNC:7605]
ENSG00000196591	0.867793	6.91434	0.164449	0.901101	HDAC2	6	113933028	114011308	-1	histone deacetylase 2 [Source:HGNC Symbol;Acc:HGNC:4853]
ENSG00000196642	-0.344865	8.05851	0.329545	0.901101	RABL6	9	136807943	136841187	1	RAB, member RAS oncogene family like 6 [Source:HGNC Symbol;Acc:HGNC:24703]
ENSG00000196704	0.447971	6.99404	0.198348	0.901101	AMZ2	17	68206076	68257712	1	archaelysin family metallopeptidase 2 [Source:HGNC Symbol;Acc:HGNC:28041]
ENSG00000196914	0.667137	7.02489	0.426305	0.901101	ARHGEF12	11	120336413	120489937	1	Rho guanine nucleotide exchange factor 12 [Source:HGNC Symbol;Acc:HGNC:14193]
ENSG00000196923	-0.360962	8.67097	0.368478	0.901101	PDLIM7	5	177483394	177497606	-1	PDZ and LIM domain 7 [Source:HGNC Symbol;Acc:HGNC:22958]
ENSG00000196924	-0.37984	11.0906	0.312893	0.901101	FLNA	X	154348524	154374634	-1	filamin A [Source:HGNC Symbol;Acc:HGNC:3754]
ENSG00000196937	0.730063	8.54188	0.310438	0.901101	FAM3C	7	121348878	121396364	-1	FAM3 metabolism regulating signaling molecule C [Source:HGNC Symbol;Acc:HGNC:18664]
ENSG00000196961	-0.377221	8.60438	0.33199	0.901101	AP2A1	19	49767001	49807114	1	adaptor related protein complex 2 subunit alpha 1 [Source:HGNC Symbol;Acc:HGNC:561]
ENSG00000197043	-0.350707	6.97131	0.447436	0.901101	ANXA6	5	151100706	151157785	-1	annexin A6 [Source:HGNC Symbol;Acc:HGNC:544]
ENSG00000197070	-0.280469	7.27163	0.380686	0.901101	ARRDC1	9	137605685	137615360	1	arrestin domain containing 1 [Source:HGNC Symbol;Acc:HGNC:28633]
ENSG00000197081	0.566514	7.08914	0.324036	0.901101	IGF2R	6	159969082	160113507	1	insulin like growth factor 2 receptor [Source:HGNC Symbol;Acc:HGNC:5467]
ENSG00000197102	0.311161	8.86072	0.514363	0.901101	DYNC1H1	14	101964573	102056443	1	dynein cytoplasmic 1 heavy chain 1 [Source:HGNC Symbol;Acc:HGNC:2961]
ENSG00000197111	0.356535	7.09283	0.247031	0.901101	PCBP2	12	53452102	53481162	1	poly(rC) binding protein 2 [Source:HGNC Symbol;Acc:HGNC:8648]
ENSG00000197142	0.384417	7.30985	0.382012	0.901101	ACSL5	10	112374018	112428380	1	acyl-CoA synthetase long chain family member 5 [Source:HGNC Symbol;Acc:HGNC:16526]
ENSG00000197170	0.860757	6.85193	0.101826	0.901101	PSMD12	17	67337916	67366605	-1	proteasome 26S subunit, non-ATPase 12 [Source:HGNC Symbol;Acc:HGNC:9557]
ENSG00000197324	-0.364409	8.38559	0.236625	0.901101	LRP10	14	22871740	22881713	1	LDL receptor related protein 10 [Source:HGNC Symbol;Acc:HGNC:14553]
ENSG00000197451	0.235433	8.65022	0.454509	0.901101	HNRNPAB	5	178204533	178211163	1	heterogeneous nuclear ribonucleoprotein A/B [Source:HGNC Symbol;Acc:HGNC:5034]
ENSG00000197483	-0.727101	6.6622	0.265644	0.901101	ZNF628	19	55476617	55484487	1	zinc finger protein 628 [Source:HGNC Symbol;Acc:HGNC:28054]
ENSG00000197530	-0.424269	9.16844	0.400774	0.901101	MIB2	1	1615415	1630610	1	mindbomb E3 ubiquitin protein ligase 2 [Source:HGNC Symbol;Acc:HGNC:30577]
ENSG00000197694	0.246305	7.22942	0.469694	0.901101	SPTAN1	9	128552558	128633662	1	spectrin alpha, non-erythrocytic 1 [Source:HGNC Symbol;Acc:HGNC:11273]
ENSG00000197747	0.40298	7.22418	0.353587	0.901101	S100A10	1	151982915	151993859	-1	S100 calcium binding protein A10 [Source:HGNC Symbol;Acc:HGNC:10487]
ENSG00000197756	-0.250231	10.1685	0.448094	0.901101	RPL37A	2	216498825	216579180	1	ribosomal protein L37a [Source:HGNC Symbol;Acc:HGNC:10348]
ENSG00000197766	-0.507915	7.33711	0.410086	0.901101	CFD	19	859664	863641	1	complement factor D [Source:HGNC Symbol;Acc:HGNC:2771]
ENSG00000197771	0.520345	7.17999	0.266416	0.901101	MCMBP	10	119829404	119892556	-1	minichromosome maintenance complex binding protein [Source:HGNC Symbol;Acc:HGNC:25782]
ENSG00000197785	-0.323474	7.89964	0.437283	0.901101	ATAD3A	1	1512162	1534685	1	ATPase family AAA domain containing 3A [Source:HGNC Symbol;Acc:HGNC:25567]
ENSG00000197858	-0.321856	7.99083	0.464684	0.901101	GPAA1	8	144082590	144086216	1	glycosylphosphatidylinositol anchor attachment 1 [Source:HGNC Symbol;Acc:HGNC:4446]
ENSG00000197879	-0.280003	9.29909	0.405016	0.901101	MYO1C	17	1464186	1492686	-1	myosin IC [Source:HGNC Symbol;Acc:HGNC:7597]
ENSG00000197894	0.53248	6.87365	0.15913	0.901101	ADH5	4	99070978	99088801	-1	alcohol dehydrogenase 5 (class III), chi polypeptide [Source:HGNC Symbol;Acc:HGNC:253]
ENSG00000198034	0.368639	10.1015	0.233777	0.901101	RPS4X	X	72255679	72277248	-1	ribosomal protein S4 X-linked [Source:HGNC Symbol;Acc:HGNC:10424]
ENSG00000198055	-0.463649	7.82456	0.254354	0.901101	GRK6	5	177403204	177442901	1	G protein-coupled receptor kinase 6 [Source:HGNC Symbol;Acc:HGNC:4545]
ENSG00000198113	-0.463257	7.73078	0.241215	0.901101	TOR4A	9	137277726	137282641	1	torsin family 4 member A [Source:HGNC Symbol;Acc:HGNC:25981]
ENSG00000198176	0.511736	7.63284	0.170772	0.901101	TFDP1	13	113584721	113641473	1	transcription factor Dp-1 [Source:HGNC Symbol;Acc:HGNC:11749]
ENSG00000198231	0.68587	7.65624	0.343217	0.901101	DDX42	17	63773603	63819317	1	DEAD-box helicase 42 [Source:HGNC Symbol;Acc:HGNC:18676]
ENSG00000198258	0.265745	6.8578	0.515941	0.901101	UBL5	19	9827892	9830115	1	ubiquitin like 5 [Source:HGNC Symbol;Acc:HGNC:13736]
ENSG00000198355	-0.528538	8.81061	0.190594	0.901101	PIM3	22	49960768	49964072	1	Pim-3 proto-oncogene, serine/threonine kinase [Source:HGNC Symbol;Acc:HGNC:19310]
ENSG00000198363	0.565106	8.63699	0.511243	0.901101	ASPH	8	61500556	61714640	-1	aspartate beta-hydroxylase [Source:HGNC Symbol;Acc:HGNC:757]
ENSG00000198380	0.73013	7.05844	0.373356	0.901101	GFPT1	2	69319780	69387250	-1	glutamine--fructose-6-phosphate transaminase 1 [Source:HGNC Symbol;Acc:HGNC:4241]
ENSG00000198408	0.748177	7.07141	0.376468	0.901101	OGA	10	101784443	101818465	-1	O-GlcNAcase [Source:HGNC Symbol;Acc:HGNC:7056]
ENSG00000198431	1.00447	8.63374	0.136293	0.901101	TXNRD1	12	104215779	104350307	1	thioredoxin reductase 1 [Source:HGNC Symbol;Acc:HGNC:12437]
ENSG00000198492	0.628993	6.79629	0.185137	0.901101	YTHDF2	1	28736621	28769775	1	YTH N6-methyladenosine RNA binding protein 2 [Source:HGNC Symbol;Acc:HGNC:31675]
ENSG00000198589	0.686503	6.95128	0.356463	0.901101	LRBA	4	150264435	151015727	-1	LPS responsive beige-like anchor protein [Source:HGNC Symbol;Acc:HGNC:1742]
ENSG00000198598	-0.688777	6.58336	0.15615	0.901101	MMP17	12	131828393	131851783	1	matrix metallopeptidase 17 [Source:HGNC Symbol;Acc:HGNC:7163]
ENSG00000198648	0.545295	7.53768	0.357901	0.901101	STK39	2	167954020	168247595	-1	serine/threonine kinase 39 [Source:HGNC Symbol;Acc:HGNC:17717]
ENSG00000198668	0.573059	7.45599	0.17685	0.901101	CALM1	14	90396502	90408268	1	calmodulin 1 [Source:HGNC Symbol;Acc:HGNC:1442]
ENSG00000198695	0.488489	11.0384	0.352212	0.901101	MT-ND6	MT	14149	14673	-1	mitochondrially encoded NADH:ubiquinone oxidoreductase core subunit 6 [Source:HGNC Symbol;Acc:HGNC:7462]
ENSG00000198712	0.258432	13.4173	0.457374	0.901101	MT-CO2	MT	7586	8269	1	mitochondrially encoded cytochrome c oxidase II [Source:HGNC Symbol;Acc:HGNC:7421]
ENSG00000198727	0.384062	12.9021	0.300993	0.901101	MT-CYB	MT	14747	15887	1	mitochondrially encoded cytochrome b [Source:HGNC Symbol;Acc:HGNC:7427]
ENSG00000198730	0.914333	6.58381	0.147682	0.901101	CTR9	11	10751246	10801625	1	CTR9 homolog, Paf1/RNA polymerase II complex component [Source:HGNC Symbol;Acc:HGNC:16850]
ENSG00000198763	0.566848	12.0066	0.146102	0.901101	MT-ND2	MT	4470	5511	1	mitochondrially encoded NADH:ubiquinone oxidoreductase core subunit 2 [Source:HGNC Symbol;Acc:HGNC:7456]
ENSG00000198786	0.504005	12.4291	0.351394	0.901101	MT-ND5	MT	12337	14148	1	mitochondrially encoded NADH:ubiquinone oxidoreductase core subunit 5 [Source:HGNC Symbol;Acc:HGNC:7461]
ENSG00000198792	-0.312325	8.09549	0.288692	0.901101	TMEM184B	22	38219291	38273010	-1	transmembrane protein 184B [Source:HGNC Symbol;Acc:HGNC:1310]
ENSG00000198804	0.390715	14.736	0.357452	0.901101	MT-CO1	MT	5904	7445	1	mitochondrially encoded cytochrome c oxidase I [Source:HGNC Symbol;Acc:HGNC:7419]
ENSG00000198830	0.32336	7.80835	0.370293	0.901101	HMGN2	1	26472440	26476642	1	high mobility group nucleosomal binding domain 2 [Source:HGNC Symbol;Acc:HGNC:4986]
ENSG00000198832	-0.342411	6.75887	0.487351	0.901101	SELENOM	22	31104772	31120069	-1	selenoprotein M [Source:HGNC Symbol;Acc:HGNC:30397]
ENSG00000198858	-0.312066	8.08436	0.435503	0.901101	R3HDM4	19	896503	913245	-1	R3H domain containing 4 [Source:HGNC Symbol;Acc:HGNC:28270]
ENSG00000198886	0.434425	13.6863	0.336671	0.901101	MT-ND4	MT	10760	12137	1	mitochondrially encoded NADH:ubiquinone oxidoreductase core subunit 4 [Source:HGNC Symbol;Acc:HGNC:7459]
ENSG00000198888	0.475135	12.229	0.227693	0.901101	MT-ND1	MT	3307	4262	1	mitochondrially encoded NADH:ubiquinone oxidoreductase core subunit 1 [Source:HGNC Symbol;Acc:HGNC:7455]
ENSG00000198899	0.506856	13.9033	0.283598	0.901101	MT-ATP6	MT	8527	9207	1	mitochondrially encoded ATP synthase membrane subunit 6 [Source:HGNC Symbol;Acc:HGNC:7414]
ENSG00000198900	0.518927	8.83516	0.506129	0.901101	TOP1	20	41028822	41124487	1	DNA topoisomerase I [Source:HGNC Symbol;Acc:HGNC:11986]
ENSG00000198911	-0.359907	8.96312	0.271205	0.901101	SREBF2	22	41833079	41907307	1	sterol regulatory element binding transcription factor 2 [Source:HGNC Symbol;Acc:HGNC:11290]
ENSG00000198931	-0.366921	7.90588	0.340046	0.901101	APRT	16	88809339	88811937	-1	adenine phosphoribosyltransferase [Source:HGNC Symbol;Acc:HGNC:626]
ENSG00000198938	0.479367	13.5436	0.22289	0.901101	MT-CO3	MT	9207	9990	1	mitochondrially encoded cytochrome c oxidase III [Source:HGNC Symbol;Acc:HGNC:7422]
ENSG00000203485	-0.395311	8.22528	0.203393	0.901101	INF2	14	104681146	104722535	1	inverted formin 2 [Source:HGNC Symbol;Acc:HGNC:23791]
ENSG00000203875	0.497424	6.59431	0.399178	0.901101	SNHG5	6	85650491	85678932	-1	small nucleolar RNA host gene 5 [Source:HGNC Symbol;Acc:HGNC:21026]
ENSG00000203879	-0.229992	8.36009	0.482287	0.901101	GDI1	X	154436913	154443467	1	GDP dissociation inhibitor 1 [Source:HGNC Symbol;Acc:HGNC:4226]
ENSG00000204371	-0.350479	7.54568	0.420199	0.901101	EHMT2	6	31879759	31897687	-1	euchromatic histone lysine methyltransferase 2 [Source:HGNC Symbol;Acc:HGNC:14129]
ENSG00000204394	-0.54223	10.1036	0.227059	0.901101	VARS1	6	31777518	31795752	-1	valyl-tRNA synthetase 1 [Source:HGNC Symbol;Acc:HGNC:12651]
ENSG00000204463	-0.468226	9.67568	0.287647	0.901101	BAG6	6	31639028	31652705	-1	BAG cochaperone 6 [Source:HGNC Symbol;Acc:HGNC:13919]
ENSG00000204469	-0.356532	9.69524	0.280136	0.901101	PRRC2A	6	31620715	31637771	1	proline rich coiled-coil 2A [Source:HGNC Symbol;Acc:HGNC:13918]
ENSG00000204525	-0.261644	10.1372	0.436207	0.901101	HLA-C	6	31268749	31272130	-1	major histocompatibility complex, class I, C [Source:HGNC Symbol;Acc:HGNC:4933]
ENSG00000204574	0.353765	7.06927	0.333614	0.901101	ABCF1	6	30571393	30597179	1	ATP binding cassette subfamily F member 1 [Source:HGNC Symbol;Acc:HGNC:70]
ENSG00000204673	-0.330617	8.22218	0.514084	0.901101	AKT1S1	19	49869033	49878459	-1	AKT1 substrate 1 [Source:HGNC Symbol;Acc:HGNC:28426]
ENSG00000204839	-0.384291	8.14164	0.371466	0.901101	MROH6	8	143566192	143572772	-1	maestro heat like repeat family member 6 [Source:HGNC Symbol;Acc:HGNC:27814]
ENSG00000205339	0.718754	7.18064	0.297367	0.901101	IPO7	11	9384652	9448127	1	importin 7 [Source:HGNC Symbol;Acc:HGNC:9852]
ENSG00000205476	-0.645058	6.84126	0.180066	0.901101	CCDC85C	14	99500190	99604207	-1	coiled-coil domain containing 85C [Source:HGNC Symbol;Acc:HGNC:35459]
ENSG00000205531	0.638205	7.21163	0.158643	0.901101	NAP1L4	11	2944431	2992377	-1	nucleosome assembly protein 1 like 4 [Source:HGNC Symbol;Acc:HGNC:7640]
ENSG00000205581	0.549833	8.10444	0.238646	0.901101	HMGN1	21	39342315	39349647	-1	high mobility group nucleosome binding domain 1 [Source:HGNC Symbol;Acc:HGNC:4984]
ENSG00000205922	-0.372582	7.64959	0.243735	0.901101	ONECUT3	19	1753506	1780988	1	one cut homeobox 3 [Source:HGNC Symbol;Acc:HGNC:13399]
ENSG00000206053	0.408023	6.95187	0.234057	0.901101	JPT2	16	1678256	1702280	1	Jupiter microtubule associated homolog 2 [Source:HGNC Symbol;Acc:HGNC:14137]
ENSG00000206075	0.91782	6.05911	0.0829676	0.901101	SERPINB5	18	63476958	63505085	1	serpin family B member 5 [Source:HGNC Symbol;Acc:HGNC:8949]
ENSG00000206503	-0.466969	9.88432	0.185408	0.901101	HLA-A	6	29941260	29945884	1	major histocompatibility complex, class I, A [Source:HGNC Symbol;Acc:HGNC:4931]
ENSG00000210082	0.243878	14.5313	0.484844	0.901101	MT-RNR2	MT	1671	3229	1	mitochondrially encoded 16S rRNA [Source:HGNC Symbol;Acc:HGNC:7471]
ENSG00000211459	0.542042	11.0127	0.119977	0.901101	MT-RNR1	MT	648	1601	1	mitochondrially encoded 12S rRNA [Source:HGNC Symbol;Acc:HGNC:7470]
ENSG00000212907	0.400742	9.64024	0.501108	0.901101	MT-ND4L	MT	10470	10766	1	mitochondrially encoded NADH:ubiquinone oxidoreductase core subunit 4L [Source:HGNC Symbol;Acc:HGNC:7460]
ENSG00000213015	-0.542723	6.69392	0.443256	0.901101	ZNF580	19	55635016	55643470	1	zinc finger protein 580 [Source:HGNC Symbol;Acc:HGNC:29473]
ENSG00000213445	-0.746323	8.38469	0.0804483	0.901101	SIPA1	11	65638101	65650918	1	signal-induced proliferation-associated 1 [Source:HGNC Symbol;Acc:HGNC:10885]
ENSG00000213563	-0.528462	7.4325	0.441455	0.901101	C8orf82	8	144525733	144529132	-1	chromosome 8 open reading frame 82 [Source:HGNC Symbol;Acc:HGNC:33826]
ENSG00000213585	0.369181	8.45828	0.275774	0.901101	VDAC1	5	133971871	134004975	-1	voltage dependent anion channel 1 [Source:HGNC Symbol;Acc:HGNC:12669]
ENSG00000214022	-0.295532	8.34334	0.387706	0.901101	REPIN1	7	150368189	150374044	1	replication initiator 1 [Source:HGNC Symbol;Acc:HGNC:17922]
ENSG00000214517	0.244724	6.79717	0.501512	0.901101	PPME1	11	74171267	74254703	1	protein phosphatase methylesterase 1 [Source:HGNC Symbol;Acc:HGNC:30178]
ENSG00000214530	-0.537132	7.06109	0.246217	0.901101	STARD10	11	72754729	72793681	-1	StAR related lipid transfer domain containing 10 [Source:HGNC Symbol;Acc:HGNC:10666]
ENSG00000215301	0.90121	8.0169	0.219315	0.901101	DDX3X	X	41333348	41364472	1	DEAD-box helicase 3 X-linked [Source:HGNC Symbol;Acc:HGNC:2745]
ENSG00000218891	-0.687316	7.98316	0.291823	0.901101	ZNF579	19	55576774	55580848	-1	zinc finger protein 579 [Source:HGNC Symbol;Acc:HGNC:26646]
ENSG00000221867	0.427056	7.178	0.232548	0.901101	MAGEA3	X	152698767	152702347	1	MAGE family member A3 [Source:HGNC Symbol;Acc:HGNC:6801]
ENSG00000225663	-0.762328	6.67754	0.183803	0.901101	MCRIP1	17	81822361	81833302	-1	MAPK regulated corepressor interacting protein 1 [Source:HGNC Symbol;Acc:HGNC:28007]
ENSG00000227500	-0.552553	7.72113	0.203373	0.901101	SCAMP4	19	1905372	1926013	1	secretory carrier membrane protein 4 [Source:HGNC Symbol;Acc:HGNC:30385]
ENSG00000228253	0.651213	8.68857	0.111044	0.901101	MT-ATP8	MT	8366	8572	1	mitochondrially encoded ATP synthase membrane subunit 8 [Source:HGNC Symbol;Acc:HGNC:7415]
ENSG00000228594	-0.926767	6.61693	0.21939	0.901101	FNDC10	1	1598012	1600135	-1	fibronectin type III domain containing 10 [Source:HGNC Symbol;Acc:HGNC:42951]
ENSG00000230989	0.503145	7.48434	0.153894	0.901101	HSBP1	16	83807978	83819737	1	heat shock factor binding protein 1 [Source:HGNC Symbol;Acc:HGNC:5203]
ENSG00000231925	-0.311131	7.32041	0.330988	0.901101	TAPBP	6	33299694	33314387	-1	TAP binding protein [Source:HGNC Symbol;Acc:HGNC:11566]
ENSG00000234745	-0.272562	8.56983	0.39279	0.901101	HLA-B	6	31353872	31357188	-1	major histocompatibility complex, class I, B [Source:HGNC Symbol;Acc:HGNC:4932]
ENSG00000235173	-0.41416	6.6097	0.375399	0.901101	HGH1	8	144137774	144140851	1	HGH1 homolog [Source:HGNC Symbol;Acc:HGNC:24161]
ENSG00000238227	-0.427769	7.63997	0.33857	0.901101	TMEM250	9	136114581	136118875	-1	transmembrane protein 250 [Source:HGNC Symbol;Acc:HGNC:31009]
ENSG00000240342	-0.322099	10.7754	0.500554	0.901101	RPS2P5	12	118246084	118246962	1	ribosomal protein S2 pseudogene 5 [Source:HGNC Symbol;Acc:HGNC:31386]
ENSG00000244405	0.401081	6.58277	0.394747	0.901101	ETV5	3	186046314	186110318	-1	ETS variant transcription factor 5 [Source:HGNC Symbol;Acc:HGNC:3494]
ENSG00000245910	0.407521	6.77655	0.363653	0.901101	SNHG6	8	66921684	66926398	-1	small nucleolar RNA host gene 6 [Source:HGNC Symbol;Acc:HGNC:32965]
ENSG00000247596	-0.3235	7.28624	0.46711	0.901101	TWF2	3	52228612	52246788	-1	twinfilin actin binding protein 2 [Source:HGNC Symbol;Acc:HGNC:9621]
ENSG00000249992	-0.551436	7.16223	0.34214	0.901101	TMEM158	3	45224466	45226287	-1	transmembrane protein 158 [Source:HGNC Symbol;Acc:HGNC:30293]
ENSG00000251322	-0.590105	7.47737	0.0609465	0.901101	SHANK3	22	50674415	50733298	1	SH3 and multiple ankyrin repeat domains 3 [Source:HGNC Symbol;Acc:HGNC:14294]
ENSG00000251493	-0.452418	7.99642	0.365088	0.901101	FOXD1	5	73444827	73448777	-1	forkhead box D1 [Source:HGNC Symbol;Acc:HGNC:3802]
ENSG00000251562	0.952613	9.27806	0.442129	0.901101	MALAT1	11	65497688	65506516	1	metastasis associated lung adenocarcinoma transcript 1 [Source:HGNC Symbol;Acc:HGNC:29665]
ENSG00000253368	-0.489957	9.11767	0.332868	0.901101	TRNP1	1	26993692	27000886	1	TMF1 regulated nuclear protein 1 [Source:HGNC Symbol;Acc:HGNC:34348]
ENSG00000253729	0.546834	8.54248	0.396669	0.901101	PRKDC	8	47773111	47960178	-1	protein kinase, DNA-activated, catalytic subunit [Source:HGNC Symbol;Acc:HGNC:9413]
ENSG00000254470	-0.294262	7.06814	0.408204	0.901101	AP5B1	11	65773898	65780976	-1	adaptor related protein complex 5 subunit beta 1 [Source:HGNC Symbol;Acc:HGNC:25104]
ENSG00000254999	0.529382	6.89499	0.150302	0.901101	BRK1	3	10115675	10127190	1	BRICK1 subunit of SCAR/WAVE actin nucleating complex [Source:HGNC Symbol;Acc:HGNC:23057]
ENSG00000255717	0.952316	7.03069	0.266612	0.901101	SNHG1	11	62851984	62855953	-1	small nucleolar RNA host gene 1 [Source:HGNC Symbol;Acc:HGNC:32688]
ENSG00000257103	0.775411	6.70608	0.278642	0.901101	LSM14A	19	34172504	34229515	1	LSM14A mRNA processing body assembly factor [Source:HGNC Symbol;Acc:HGNC:24489]
ENSG00000257923	-0.268695	8.08011	0.409334	0.901101	CUX1	7	101815904	102283958	1	cut like homeobox 1 [Source:HGNC Symbol;Acc:HGNC:2557]
ENSG00000259803	-0.393649	7.71806	0.362104	0.901101	SLC22A31	16	89195761	89201651	-1	solute carrier family 22 member 31 [Source:HGNC Symbol;Acc:HGNC:27091]
ENSG00000259956	-0.308552	7.96653	0.475704	0.901101	RBM15B	3	51391285	51397908	1	RNA binding motif protein 15B [Source:HGNC Symbol;Acc:HGNC:24303]
ENSG00000260001	-1.24408	6.43059	0.159218	0.901101	TGFBR3L	19	7916145	7919097	1	transforming growth factor beta receptor 3 like [Source:HGNC Symbol;Acc:HGNC:44152]
ENSG00000260032	0.966706	7.9074	0.27888	0.901101	NORAD	20	36045618	36051018	-1	non-coding RNA activated by DNA damage [Source:HGNC Symbol;Acc:HGNC:44311]
ENSG00000261221	-0.462694	6.89629	0.295811	0.901101	ZNF865	19	55605647	55617269	1	zinc finger protein 865 [Source:HGNC Symbol;Acc:HGNC:38705]
ENSG00000261236	-0.559977	9.90431	0.26327	0.901101	BOP1	8	144262045	144291438	-1	BOP1 ribosomal biogenesis factor [Source:HGNC Symbol;Acc:HGNC:15519]
ENSG00000264364	0.495431	8.19197	0.257356	0.901101	DYNLL2	17	58083419	58095542	1	dynein light chain LC8-type 2 [Source:HGNC Symbol;Acc:HGNC:24596]
ENSG00000266412	0.793013	6.7165	0.189641	0.901101	NCOA4	10	46005088	46030714	-1	nuclear receptor coactivator 4 [Source:HGNC Symbol;Acc:HGNC:7671]
ENSG00000270647	0.42596	8.29519	0.398293	0.901101	TAF15	17	35713791	35864615	1	TATA-box binding protein associated factor 15 [Source:HGNC Symbol;Acc:HGNC:11547]
ENSG00000273604	-0.726344	8.00827	0.20474	0.901101	EPOP	17	38671703	38674957	-1	elongin BC and polycomb repressive complex 2 associated protein [Source:HGNC Symbol;Acc:HGNC:34493]
ENSG00000273749	0.228895	8.3229	0.489599	0.901101	CYFIP1	15	22867052	22981063	-1	cytoplasmic FMR1 interacting protein 1 [Source:HGNC Symbol;Acc:HGNC:13759]
ENSG00000275832	-0.277651	7.36397	0.412616	0.901101	ARHGAP23	17	38419280	38512385	1	Rho GTPase activating protein 23 [Source:HGNC Symbol;Acc:HGNC:29293]
ENSG00000277972	-0.312227	6.67163	0.495921	0.901101	CISD3	17	38730341	38735605	1	CDGSH iron sulfur domain 3 [Source:HGNC Symbol;Acc:HGNC:27578]
ENSG00000182512	0.214785	7.35127	0.51734	0.901617	GLRX5	14	95533503	95544724	1	glutaredoxin 5 [Source:HGNC Symbol;Acc:HGNC:20134]
ENSG00000130725	-0.251166	8.09875	0.518282	0.90172	UBE2M	19	58555712	58558954	-1	ubiquitin conjugating enzyme E2 M [Source:HGNC Symbol;Acc:HGNC:12491]
ENSG00000138363	0.20089	7.22805	0.518517	0.90172	ATIC	2	215311956	215349773	1	5-aminoimidazole-4-carboxamide ribonucleotide formyltransferase/IMP cyclohydrolase [Source:HGNC Symbol;Acc:HGNC:794]
ENSG00000169992	-0.237613	7.63951	0.518004	0.90172	NLGN2	17	7404874	7419860	1	neuroligin 2 [Source:HGNC Symbol;Acc:HGNC:14290]
ENSG00000171148	-0.250347	7.60634	0.519102	0.902089	TADA3	3	9779860	9793011	-1	transcriptional adaptor 3 [Source:HGNC Symbol;Acc:HGNC:19422]
ENSG00000204580	-0.197451	9.45082	0.519513	0.902155	DDR1	6	30876421	30900156	1	discoidin domain receptor tyrosine kinase 1 [Source:HGNC Symbol;Acc:HGNC:2730]
ENSG00000007202	0.24256	7.03802	0.533114	0.903029	KIAA0100	17	28614446	28645454	-1	KIAA0100 [Source:HGNC Symbol;Acc:HGNC:28960]
ENSG00000011347	-0.204259	7.02732	0.546601	0.903029	SYT7	11	61513714	61581148	-1	synaptotagmin 7 [Source:HGNC Symbol;Acc:HGNC:11514]
ENSG00000019186	0.295376	7.82107	0.5483	0.903029	CYP24A1	20	54153446	54173986	-1	cytochrome P450 family 24 subfamily A member 1 [Source:HGNC Symbol;Acc:HGNC:2602]
ENSG00000034152	-0.213681	7.69262	0.531182	0.903029	MAP2K3	17	21284672	21315232	1	mitogen-activated protein kinase kinase 3 [Source:HGNC Symbol;Acc:HGNC:6843]
ENSG00000034510	-0.209733	10.6579	0.543341	0.903029	TMSB10	2	84905656	84906671	1	thymosin beta 10 [Source:HGNC Symbol;Acc:HGNC:11879]
ENSG00000062485	0.208276	7.62928	0.528277	0.903029	CS	12	56271699	56300391	-1	citrate synthase [Source:HGNC Symbol;Acc:HGNC:2422]
ENSG00000064666	-0.230184	8.58445	0.52461	0.903029	CNN2	19	1026586	1039068	1	calponin 2 [Source:HGNC Symbol;Acc:HGNC:2156]
ENSG00000064961	-0.248864	8.17715	0.543947	0.903029	HMG20B	19	3572777	3579088	1	high mobility group 20B [Source:HGNC Symbol;Acc:HGNC:5002]
ENSG00000088448	0.501461	6.63213	0.542853	0.903029	ANKRD10	13	110878540	110915069	-1	ankyrin repeat domain 10 [Source:HGNC Symbol;Acc:HGNC:20265]
ENSG00000100813	0.313156	7.54528	0.529861	0.903029	ACIN1	14	23058564	23095614	-1	apoptotic chromatin condensation inducer 1 [Source:HGNC Symbol;Acc:HGNC:17066]
ENSG00000101150	0.178365	8.30322	0.547729	0.903029	TPD52L2	20	63865228	63891545	1	TPD52 like 2 [Source:HGNC Symbol;Acc:HGNC:12007]
ENSG00000101182	0.197668	8.65076	0.530114	0.903029	PSMA7	20	62136733	62143440	-1	proteasome 20S subunit alpha 7 [Source:HGNC Symbol;Acc:HGNC:9536]
ENSG00000104969	-0.262874	8.70947	0.526068	0.903029	SGTA	19	2754715	2783362	-1	small glutamine rich tetratricopeptide repeat containing alpha [Source:HGNC Symbol;Acc:HGNC:10819]
ENSG00000105197	-0.243873	7.68276	0.535242	0.903029	TIMM50	19	39480412	39493785	1	translocase of inner mitochondrial membrane 50 [Source:HGNC Symbol;Acc:HGNC:23656]
ENSG00000105426	-0.214085	7.98447	0.547872	0.903029	PTPRS	19	5158495	5340803	-1	protein tyrosine phosphatase receptor type S [Source:HGNC Symbol;Acc:HGNC:9681]
ENSG00000105568	-0.291562	9.18219	0.523185	0.903029	PPP2R1A	19	52190048	52229518	1	protein phosphatase 2 scaffold subunit Aalpha [Source:HGNC Symbol;Acc:HGNC:9302]
ENSG00000105698	-0.246682	7.97678	0.527776	0.903029	USF2	19	35268962	35279821	1	upstream transcription factor 2, c-fos interacting [Source:HGNC Symbol;Acc:HGNC:12594]
ENSG00000107731	-0.323969	7.92	0.537359	0.903029	UNC5B	10	71212570	71302864	1	unc-5 netrin receptor B [Source:HGNC Symbol;Acc:HGNC:12568]
ENSG00000107874	-0.209396	7.5345	0.543742	0.903029	CUEDC2	10	102423245	102432584	-1	CUE domain containing 2 [Source:HGNC Symbol;Acc:HGNC:28352]
ENSG00000108100	0.275895	6.73078	0.528152	0.903029	CCNY	10	35247025	35572669	1	cyclin Y [Source:HGNC Symbol;Acc:HGNC:23354]
ENSG00000112118	0.248298	7.43626	0.548246	0.903029	MCM3	6	52264014	52284881	-1	minichromosome maintenance complex component 3 [Source:HGNC Symbol;Acc:HGNC:6945]
ENSG00000114867	0.201833	9.66179	0.53416	0.903029	EIF4G1	3	184314495	184335358	1	eukaryotic translation initiation factor 4 gamma 1 [Source:HGNC Symbol;Acc:HGNC:3296]
ENSG00000114993	-0.216804	6.8951	0.542396	0.903029	RTKN	2	74425835	74442422	-1	rhotekin [Source:HGNC Symbol;Acc:HGNC:10466]
ENSG00000123416	-0.340671	8.16583	0.525799	0.903029	TUBA1B	12	49127782	49131397	-1	tubulin alpha 1b [Source:HGNC Symbol;Acc:HGNC:18809]
ENSG00000123992	-0.192852	7.15499	0.528941	0.903029	DNPEP	2	219372043	219400022	-1	aspartyl aminopeptidase [Source:HGNC Symbol;Acc:HGNC:2981]
ENSG00000125844	0.32644	8.60793	0.541875	0.903029	RRBP1	20	17613678	17682295	-1	ribosome binding protein 1 [Source:HGNC Symbol;Acc:HGNC:10448]
ENSG00000127948	-0.245524	8.33039	0.52631	0.903029	POR	7	75899200	75986855	1	cytochrome p450 oxidoreductase [Source:HGNC Symbol;Acc:HGNC:9208]
ENSG00000128731	0.353939	6.98704	0.526797	0.903029	HERC2	15	28111040	28322179	-1	HECT and RLD domain containing E3 ubiquitin protein ligase 2 [Source:HGNC Symbol;Acc:HGNC:4868]
ENSG00000130244	-0.322228	7.00607	0.536201	0.903029	FAM98C	19	38403135	38409088	1	family with sequence similarity 98 member C [Source:HGNC Symbol;Acc:HGNC:27119]
ENSG00000132153	-0.222047	8.67761	0.5439	0.903029	DHX30	3	47802909	47850195	1	DExH-box helicase 30 [Source:HGNC Symbol;Acc:HGNC:16716]
ENSG00000134287	0.197518	7.74828	0.547782	0.903029	ARF3	12	48935723	48957487	-1	ADP ribosylation factor 3 [Source:HGNC Symbol;Acc:HGNC:654]
ENSG00000135446	-0.202958	7.38149	0.548058	0.903029	CDK4	12	57747727	57756013	-1	cyclin dependent kinase 4 [Source:HGNC Symbol;Acc:HGNC:1773]
ENSG00000136807	0.183249	7.44189	0.547814	0.903029	CDK9	9	127785679	127790792	1	cyclin dependent kinase 9 [Source:HGNC Symbol;Acc:HGNC:1780]
ENSG00000140553	-0.241331	7.92519	0.524094	0.903029	UNC45A	15	90930180	90954093	1	unc-45 myosin chaperone A [Source:HGNC Symbol;Acc:HGNC:30594]
ENSG00000145349	0.485857	6.68794	0.527182	0.903029	CAMK2D	4	113451032	113761927	-1	calcium/calmodulin dependent protein kinase II delta [Source:HGNC Symbol;Acc:HGNC:1462]
ENSG00000147162	0.724172	7.05535	0.543574	0.903029	OGT	X	71533104	71575892	1	O-linked N-acetylglucosamine (GlcNAc) transferase [Source:HGNC Symbol;Acc:HGNC:8127]
ENSG00000147403	-0.210526	11.0709	0.537522	0.903029	RPL10	X	154389955	154409168	1	ribosomal protein L10 [Source:HGNC Symbol;Acc:HGNC:10298]
ENSG00000148296	0.270767	6.82454	0.539288	0.903029	SURF6	9	133328776	133336188	-1	surfeit 6 [Source:HGNC Symbol;Acc:HGNC:11478]
ENSG00000148308	-0.210096	7.24271	0.542873	0.903029	GTF3C5	9	133030675	133058503	1	general transcription factor IIIC subunit 5 [Source:HGNC Symbol;Acc:HGNC:4668]
ENSG00000148400	-0.200802	7.71166	0.544862	0.903029	NOTCH1	9	136494433	136546048	-1	notch receptor 1 [Source:HGNC Symbol;Acc:HGNC:7881]
ENSG00000152556	0.231713	7.65839	0.527016	0.903029	PFKM	12	48105139	48146404	1	phosphofructokinase, muscle [Source:HGNC Symbol;Acc:HGNC:8877]
ENSG00000153443	-0.315256	7.38277	0.521493	0.903029	UBALD1	16	4608883	4615027	-1	UBA like domain containing 1 [Source:HGNC Symbol;Acc:HGNC:29576]
ENSG00000156482	0.207219	8.81449	0.53494	0.903029	RPL30	8	98024851	98046469	-1	ribosomal protein L30 [Source:HGNC Symbol;Acc:HGNC:10333]
ENSG00000158710	-0.263893	7.49503	0.523563	0.903029	TAGLN2	1	159918107	159925507	-1	transgelin 2 [Source:HGNC Symbol;Acc:HGNC:11554]
ENSG00000159069	-0.315087	8.46751	0.534113	0.903029	FBXW5	9	136940435	136944738	-1	F-box and WD repeat domain containing 5 [Source:HGNC Symbol;Acc:HGNC:13613]
ENSG00000162783	-0.19085	8.31408	0.533522	0.903029	IER5	1	181088700	181092900	1	immediate early response 5 [Source:HGNC Symbol;Acc:HGNC:5393]
ENSG00000163382	-0.260565	8.07336	0.545025	0.903029	NAXE	1	156591762	156594299	1	NAD(P)HX epimerase [Source:HGNC Symbol;Acc:HGNC:18453]
ENSG00000163682	0.206622	9.41512	0.529824	0.903029	RPL9	4	39452587	39458931	-1	ribosomal protein L9 [Source:HGNC Symbol;Acc:HGNC:10369]
ENSG00000164068	-0.228383	6.87649	0.531069	0.903029	RNF123	3	49689538	49721529	1	ring finger protein 123 [Source:HGNC Symbol;Acc:HGNC:21148]
ENSG00000164442	0.239805	6.9257	0.544214	0.903029	CITED2	6	139371807	139374648	-1	Cbp/p300 interacting transactivator with Glu/Asp rich carboxy-terminal domain 2 [Source:HGNC Symbol;Acc:HGNC:1987]
ENSG00000166949	0.254766	7.36009	0.540748	0.903029	SMAD3	15	67063763	67195169	1	SMAD family member 3 [Source:HGNC Symbol;Acc:HGNC:6769]
ENSG00000167608	-0.260365	7.14291	0.52917	0.903029	TMC4	19	54160108	54173250	-1	transmembrane channel like 4 [Source:HGNC Symbol;Acc:HGNC:22998]
ENSG00000167792	-0.228428	8.31807	0.526716	0.903029	NDUFV1	11	67605653	67612554	1	NADH:ubiquinone oxidoreductase core subunit V1 [Source:HGNC Symbol;Acc:HGNC:7716]
ENSG00000169957	-0.229309	7.23672	0.528301	0.903029	ZNF768	16	30524004	30526821	-1	zinc finger protein 768 [Source:HGNC Symbol;Acc:HGNC:26273]
ENSG00000170889	-0.23253	11.1271	0.544012	0.903029	RPS9	19	54200809	54249003	1	ribosomal protein S9 [Source:HGNC Symbol;Acc:HGNC:10442]
ENSG00000171222	-0.374688	6.77452	0.531003	0.903029	SCAND1	20	35953617	35959472	-1	SCAN domain containing 1 [Source:HGNC Symbol;Acc:HGNC:10566]
ENSG00000171302	-0.199251	7.70117	0.538769	0.903029	CANT1	17	78991716	79009867	-1	calcium activated nucleotidase 1 [Source:HGNC Symbol;Acc:HGNC:19721]
ENSG00000171604	-0.220321	6.8317	0.539341	0.903029	CXXC5	5	139647299	139683882	1	CXXC finger protein 5 [Source:HGNC Symbol;Acc:HGNC:26943]
ENSG00000172531	-0.278641	8.51728	0.546759	0.903029	PPP1CA	11	67398181	67421183	-1	protein phosphatase 1 catalytic subunit alpha [Source:HGNC Symbol;Acc:HGNC:9281]
ENSG00000177238	-0.188297	7.14228	0.547972	0.903029	TRIM72	16	31214091	31231537	1	tripartite motif containing 72 [Source:HGNC Symbol;Acc:HGNC:32671]
ENSG00000177542	-0.216624	7.70452	0.533518	0.903029	SLC25A22	11	790475	798281	-1	solute carrier family 25 member 22 [Source:HGNC Symbol;Acc:HGNC:19954]
ENSG00000179950	-0.267977	8.96969	0.538909	0.903029	PUF60	8	143816344	143829352	-1	poly(U) binding splicing factor 60 [Source:HGNC Symbol;Acc:HGNC:17042]
ENSG00000180891	0.251316	7.9348	0.523151	0.903029	CUEDC1	17	57861243	57955412	-1	CUE domain containing 1 [Source:HGNC Symbol;Acc:HGNC:31350]
ENSG00000183723	0.428529	6.78555	0.529121	0.903029	CMTM4	16	66614750	66696743	-1	CKLF like MARVEL transmembrane domain containing 4 [Source:HGNC Symbol;Acc:HGNC:19175]
ENSG00000187608	-0.220439	8.01176	0.534177	0.903029	ISG15	1	1001138	1014540	1	ISG15 ubiquitin like modifier [Source:HGNC Symbol;Acc:HGNC:4053]
ENSG00000187778	-0.238129	7.01399	0.537435	0.903029	MCRS1	12	49556544	49568145	-1	microspherule protein 1 [Source:HGNC Symbol;Acc:HGNC:6960]
ENSG00000188130	-0.191233	7.3493	0.523348	0.903029	MAPK12	22	50245450	50261716	-1	mitogen-activated protein kinase 12 [Source:HGNC Symbol;Acc:HGNC:6874]
ENSG00000188157	-0.246851	9.08894	0.548387	0.903029	AGRN	1	1020120	1056118	1	agrin [Source:HGNC Symbol;Acc:HGNC:329]
ENSG00000188986	-0.23936	7.80472	0.535096	0.903029	NELFB	9	137255327	137273542	1	negative elongation factor complex member B [Source:HGNC Symbol;Acc:HGNC:24324]
ENSG00000198952	0.220361	7.16708	0.536929	0.903029	SMG5	1	156249224	156282825	-1	SMG5 nonsense mediated mRNA decay factor [Source:HGNC Symbol;Acc:HGNC:24644]
ENSG00000203950	-0.233585	7.36115	0.530551	0.903029	RTL8A	X	135050932	135052196	-1	retrotransposon Gag like 8A [Source:HGNC Symbol;Acc:HGNC:24514]
ENSG00000204256	0.233692	8.47735	0.539292	0.903029	BRD2	6	32968594	32981505	1	bromodomain containing 2 [Source:HGNC Symbol;Acc:HGNC:1103]
ENSG00000214706	-0.222898	7.83701	0.546072	0.903029	IFRD2	3	50287732	50292918	-1	interferon related developmental regulator 2 [Source:HGNC Symbol;Acc:HGNC:5457]
ENSG00000233276	-0.299154	9.90365	0.523898	0.903029	GPX1	3	49357176	49358358	-1	glutathione peroxidase 1 [Source:HGNC Symbol;Acc:HGNC:4553]
ENSG00000234741	0.553513	8.52493	0.541599	0.903029	GAS5	1	173858559	173868882	-1	growth arrest specific 5 [Source:HGNC Symbol;Acc:HGNC:16355]
ENSG00000278540	0.371903	7.3986	0.543591	0.903029	ACACA	17	37084992	37406836	-1	acetyl-CoA carboxylase alpha [Source:HGNC Symbol;Acc:HGNC:84]
ENSG00000097021	-0.313015	8.15548	0.549344	0.903709	ACOT7	1	6264269	6393767	-1	acyl-CoA thioesterase 7 [Source:HGNC Symbol;Acc:HGNC:24157]
ENSG00000117676	-0.213425	7.07478	0.549548	0.903709	RPS6KA1	1	26529761	26575030	1	ribosomal protein S6 kinase A1 [Source:HGNC Symbol;Acc:HGNC:10430]
ENSG00000055483	0.271347	7.09712	0.550751	0.903965	USP36	17	78787381	78841441	-1	ubiquitin specific peptidase 36 [Source:HGNC Symbol;Acc:HGNC:20062]
ENSG00000173156	-0.304433	7.27123	0.55106	0.903965	RHOD	11	67056847	67072017	1	ras homolog family member D [Source:HGNC Symbol;Acc:HGNC:670]
ENSG00000179051	0.220137	8.27489	0.551198	0.903965	RCC2	1	17406760	17439677	-1	regulator of chromosome condensation 2 [Source:HGNC Symbol;Acc:HGNC:30297]
ENSG00000197912	0.275449	7.19472	0.550957	0.903965	SPG7	16	89490719	89557766	1	SPG7 matrix AAA peptidase subunit, paraplegin [Source:HGNC Symbol;Acc:HGNC:11237]
ENSG00000011422	-0.26338	7.0279	0.555227	0.904149	PLAUR	19	43646095	43670547	-1	plasminogen activator, urokinase receptor [Source:HGNC Symbol;Acc:HGNC:9053]
ENSG00000089820	-0.216059	7.89372	0.554316	0.904149	ARHGAP4	X	153907367	153934999	-1	Rho GTPase activating protein 4 [Source:HGNC Symbol;Acc:HGNC:674]
ENSG00000117448	-0.180987	7.25086	0.555246	0.904149	AKR1A1	1	45550543	45570049	1	aldo-keto reductase family 1 member A1 [Source:HGNC Symbol;Acc:HGNC:380]
ENSG00000123908	0.359434	7.25315	0.555404	0.904149	AGO2	8	140520156	140635633	-1	argonaute RISC catalytic component 2 [Source:HGNC Symbol;Acc:HGNC:3263]
ENSG00000125648	-0.207594	7.89438	0.555422	0.904149	SLC25A23	19	6436079	6465203	-1	solute carrier family 25 member 23 [Source:HGNC Symbol;Acc:HGNC:19375]
ENSG00000144579	-0.211415	6.70313	0.553125	0.904149	CTDSP1	2	218398256	218405941	1	CTD small phosphatase 1 [Source:HGNC Symbol;Acc:HGNC:21614]
ENSG00000149809	-0.213483	7.14641	0.555134	0.904149	TM7SF2	11	65111845	65116408	1	transmembrane 7 superfamily member 2 [Source:HGNC Symbol;Acc:HGNC:11863]
ENSG00000167522	0.387579	9.20604	0.554322	0.904149	ANKRD11	16	89267630	89490561	-1	ankyrin repeat domain 11 [Source:HGNC Symbol;Acc:HGNC:21316]
ENSG00000167775	-0.321802	7.25371	0.552784	0.904149	CD320	19	8302127	8308358	-1	CD320 molecule [Source:HGNC Symbol;Acc:HGNC:16692]
ENSG00000196154	0.208015	7.72029	0.553644	0.904149	S100A4	1	153543613	153550136	-1	S100 calcium binding protein A4 [Source:HGNC Symbol;Acc:HGNC:10494]
ENSG00000228300	-0.342808	7.12474	0.553973	0.904149	FAM174C	19	1275530	1279244	1	family with sequence similarity 174 member C [Source:HGNC Symbol;Acc:HGNC:26073]
ENSG00000103363	-0.21957	7.84869	0.556755	0.905101	ELOB	16	2771414	2777280	-1	elongin B [Source:HGNC Symbol;Acc:HGNC:11619]
ENSG00000106948	-0.372072	6.28534	0.556707	0.905101	AKNA	9	114334156	114394405	-1	AT-hook transcription factor [Source:HGNC Symbol;Acc:HGNC:24108]
ENSG00000100297	-0.334697	7.90696	0.557721	0.90561	MCM5	22	35400134	35425431	1	minichromosome maintenance complex component 5 [Source:HGNC Symbol;Acc:HGNC:6948]
ENSG00000110047	-0.225889	7.87729	0.558503	0.90561	EHD1	11	64851642	64888296	-1	EH domain containing 1 [Source:HGNC Symbol;Acc:HGNC:3242]
ENSG00000178952	-0.235034	9.83498	0.558551	0.90561	TUFM	16	28842411	28846348	-1	Tu translation elongation factor, mitochondrial [Source:HGNC Symbol;Acc:HGNC:12420]
ENSG00000229117	0.217777	8.75478	0.558565	0.90561	RPL41	12	56116590	56117967	1	ribosomal protein L41 [Source:HGNC Symbol;Acc:HGNC:10354]
ENSG00000014216	-0.272919	9.89219	0.559092	0.905856	CAPN1	11	65180566	65212006	1	calpain 1 [Source:HGNC Symbol;Acc:HGNC:1476]
ENSG00000147065	0.181237	8.31634	0.559926	0.906601	MSN	X	65588377	65741931	1	moesin [Source:HGNC Symbol;Acc:HGNC:7373]
ENSG00000115307	0.173003	7.5106	0.561331	0.907895	AUP1	2	74526645	74529760	-1	AUP1 lipid droplet regulating VLDL assembly factor [Source:HGNC Symbol;Acc:HGNC:891]
ENSG00000143256	0.352782	7.41215	0.562227	0.907895	PFDN2	1	161100556	161118055	-1	prefoldin subunit 2 [Source:HGNC Symbol;Acc:HGNC:8867]
ENSG00000169727	-0.273764	8.86409	0.562123	0.907895	GPS1	17	82050691	82057470	1	G protein pathway suppressor 1 [Source:HGNC Symbol;Acc:HGNC:4549]
ENSG00000185298	0.244522	6.79321	0.561552	0.907895	CCDC137	17	81666737	81673904	1	coiled-coil domain containing 137 [Source:HGNC Symbol;Acc:HGNC:33451]
ENSG00000004059	-0.257676	8.30436	0.56333	0.907917	ARF5	7	127588386	127591700	1	ADP ribosylation factor 5 [Source:HGNC Symbol;Acc:HGNC:658]
ENSG00000071127	0.181349	9.28035	0.563367	0.907917	WDR1	4	10074339	10116949	-1	WD repeat domain 1 [Source:HGNC Symbol;Acc:HGNC:12754]
ENSG00000175573	-0.243605	7.30659	0.563229	0.907917	C11orf68	11	65916810	65919062	-1	chromosome 11 open reading frame 68 [Source:HGNC Symbol;Acc:HGNC:28801]
ENSG00000176248	-0.201607	7.38788	0.564021	0.908367	ANAPC2	9	137174784	137188560	-1	anaphase promoting complex subunit 2 [Source:HGNC Symbol;Acc:HGNC:19989]
ENSG00000080819	0.313081	7.99851	0.56489	0.909162	CPOX	3	98579446	98593648	-1	coproporphyrinogen oxidase [Source:HGNC Symbol;Acc:HGNC:2321]
ENSG00000137331	-0.26924	9.45552	0.566104	0.909904	IER3	6	30743199	30744548	-1	immediate early response 3 [Source:HGNC Symbol;Acc:HGNC:5392]
ENSG00000245532	0.871729	7.64079	0.565916	0.909904	NEAT1	11	65422774	65445540	1	nuclear paraspeckle assembly transcript 1 [Source:HGNC Symbol;Acc:HGNC:30815]
ENSG00000069998	-0.208466	7.19369	0.566771	0.910178	HDHD5	22	17137511	17165287	-1	haloacid dehalogenase like hydrolase domain containing 5 [Source:HGNC Symbol;Acc:HGNC:1843]
ENSG00000172270	-0.243995	10.7733	0.567027	0.910178	BSG	19	571277	583493	1	basigin (Ok blood group) [Source:HGNC Symbol;Acc:HGNC:1116]
ENSG00000079616	-0.246348	6.95295	0.568387	0.911756	KIF22	16	29790719	29805384	1	kinesin family member 22 [Source:HGNC Symbol;Acc:HGNC:6391]
ENSG00000007080	-0.217878	8.59876	0.587282	0.913041	CCDC124	19	17933015	17943991	1	coiled-coil domain containing 124 [Source:HGNC Symbol;Acc:HGNC:25171]
ENSG00000025708	-0.249031	7.0469	0.57896	0.913041	TYMP	22	50525752	50530032	-1	thymidine phosphorylase [Source:HGNC Symbol;Acc:HGNC:3148]
ENSG00000067082	0.442338	6.83869	0.58467	0.913041	KLF6	10	3775996	3785281	-1	Kruppel like factor 6 [Source:HGNC Symbol;Acc:HGNC:2235]
ENSG00000086758	0.267679	9.01944	0.577043	0.913041	HUWE1	X	53532096	53686728	-1	HECT, UBA and WWE domain containing E3 ubiquitin protein ligase 1 [Source:HGNC Symbol;Acc:HGNC:30892]
ENSG00000090863	0.314857	8.93688	0.582386	0.913041	GLG1	16	74447427	74607144	-1	golgi glycoprotein 1 [Source:HGNC Symbol;Acc:HGNC:4316]
ENSG00000101255	-0.446248	8.36914	0.584522	0.913041	TRIB3	20	362835	397559	1	tribbles pseudokinase 3 [Source:HGNC Symbol;Acc:HGNC:16228]
ENSG00000103266	-0.242421	6.95325	0.581066	0.913041	STUB1	16	680224	682870	1	STIP1 homology and U-box containing protein 1 [Source:HGNC Symbol;Acc:HGNC:11427]
ENSG00000107130	-0.169403	7.55134	0.579848	0.913041	NCS1	9	130172404	130237303	1	neuronal calcium sensor 1 [Source:HGNC Symbol;Acc:HGNC:3953]
ENSG00000110651	-0.226005	8.81456	0.587818	0.913041	CD81	11	2376177	2397397	1	CD81 molecule [Source:HGNC Symbol;Acc:HGNC:1701]
ENSG00000113712	0.357931	7.27036	0.580607	0.913041	CSNK1A1	5	149492982	149551471	-1	casein kinase 1 alpha 1 [Source:HGNC Symbol;Acc:HGNC:2451]
ENSG00000114738	-0.200229	7.67648	0.587937	0.913041	MAPKAPK3	3	50611520	50649291	1	MAPK activated protein kinase 3 [Source:HGNC Symbol;Acc:HGNC:6888]
ENSG00000115216	0.185557	6.84182	0.582977	0.913041	NRBP1	2	27427790	27442259	1	nuclear receptor binding protein 1 [Source:HGNC Symbol;Acc:HGNC:7993]
ENSG00000115275	-0.176686	7.61477	0.581361	0.913041	MOGS	2	74461057	74465410	-1	mannosyl-oligosaccharide glucosidase [Source:HGNC Symbol;Acc:HGNC:24862]
ENSG00000115944	0.204745	6.83271	0.576557	0.913041	COX7A2L	2	42333546	42425088	-1	cytochrome c oxidase subunit 7A2 like [Source:HGNC Symbol;Acc:HGNC:2289]
ENSG00000116649	-0.290147	8.39454	0.571955	0.913041	SRM	1	11054584	11060020	-1	spermidine synthase [Source:HGNC Symbol;Acc:HGNC:11296]
ENSG00000119669	-0.210863	8.5258	0.584849	0.913041	IRF2BPL	14	77024543	77028708	-1	interferon regulatory factor 2 binding protein like [Source:HGNC Symbol;Acc:HGNC:14282]
ENSG00000123352	0.428892	6.98258	0.572809	0.913041	SPATS2	12	49366584	49527425	1	spermatogenesis associated serine rich 2 [Source:HGNC Symbol;Acc:HGNC:18650]
ENSG00000124155	-0.197822	7.37739	0.572392	0.913041	PIGT	20	45416084	45456934	1	phosphatidylinositol glycan anchor biosynthesis class T [Source:HGNC Symbol;Acc:HGNC:14938]
ENSG00000128591	-0.223217	9.17407	0.583014	0.913041	FLNC	7	128830406	128859274	1	filamin C [Source:HGNC Symbol;Acc:HGNC:3756]
ENSG00000128626	-0.234301	7.11018	0.574131	0.913041	MRPS12	19	38930944	38933168	1	mitochondrial ribosomal protein S12 [Source:HGNC Symbol;Acc:HGNC:10380]
ENSG00000129562	0.171017	7.17935	0.586326	0.913041	DAD1	14	22564907	22589224	-1	defender against cell death 1 [Source:HGNC Symbol;Acc:HGNC:2664]
ENSG00000130309	-0.16686	7.88476	0.585884	0.913041	COLGALT1	19	17555649	17583162	1	collagen beta(1-O)galactosyltransferase 1 [Source:HGNC Symbol;Acc:HGNC:26182]
ENSG00000130787	-0.171186	7.63731	0.571103	0.913041	HIP1R	12	122834453	122862961	1	huntingtin interacting protein 1 related [Source:HGNC Symbol;Acc:HGNC:18415]
ENSG00000132819	-0.23278	7.11533	0.579131	0.913041	RBM38	20	57391396	57409333	1	RNA binding motif protein 38 [Source:HGNC Symbol;Acc:HGNC:15818]
ENSG00000134247	0.279569	6.7676	0.571275	0.913041	PTGFRN	1	116909916	116990353	1	prostaglandin F2 receptor inhibitor [Source:HGNC Symbol;Acc:HGNC:9601]
ENSG00000136026	-0.175523	7.30711	0.583475	0.913041	CKAP4	12	106237881	106304279	-1	cytoskeleton associated protein 4 [Source:HGNC Symbol;Acc:HGNC:16991]
ENSG00000137076	-0.173219	8.61378	0.585732	0.913041	TLN1	9	35696948	35732195	-1	talin 1 [Source:HGNC Symbol;Acc:HGNC:11845]
ENSG00000137106	-0.184441	7.83952	0.578242	0.913041	GRHPR	9	37422666	37436990	1	glyoxylate and hydroxypyruvate reductase [Source:HGNC Symbol;Acc:HGNC:4570]
ENSG00000143569	0.186601	7.72291	0.582252	0.913041	UBAP2L	1	154220179	154271510	1	ubiquitin associated protein 2 like [Source:HGNC Symbol;Acc:HGNC:29877]
ENSG00000144591	-0.178429	6.99127	0.577106	0.913041	GMPPA	2	219498884	219506989	1	GDP-mannose pyrophosphorylase A [Source:HGNC Symbol;Acc:HGNC:22923]
ENSG00000160007	0.352825	7.07759	0.58806	0.913041	ARHGAP35	19	46860997	47005077	1	Rho GTPase activating protein 35 [Source:HGNC Symbol;Acc:HGNC:4591]
ENSG00000160789	-0.190489	10.4677	0.575587	0.913041	LMNA	1	156082573	156140089	1	lamin A/C [Source:HGNC Symbol;Acc:HGNC:6636]
ENSG00000165527	0.226784	7.82921	0.58495	0.913041	ARF6	14	49893082	49897054	1	ADP ribosylation factor 6 [Source:HGNC Symbol;Acc:HGNC:659]
ENSG00000165689	0.174225	7.07979	0.587005	0.913041	ENTR1	9	136401922	136410614	-1	endosome associated trafficking regulator 1 [Source:HGNC Symbol;Acc:HGNC:10667]
ENSG00000167880	-0.162803	8.03455	0.578216	0.913041	EVPL	17	76004502	76027306	-1	envoplakin [Source:HGNC Symbol;Acc:HGNC:3503]
ENSG00000168090	0.185099	7.28865	0.574086	0.913041	COPS6	7	100088969	100092187	1	COP9 signalosome subunit 6 [Source:HGNC Symbol;Acc:HGNC:21749]
ENSG00000168710	0.305824	7.08984	0.576683	0.913041	AHCYL1	1	109984765	110023742	1	adenosylhomocysteinase like 1 [Source:HGNC Symbol;Acc:HGNC:344]
ENSG00000174748	0.17988	10.2138	0.576954	0.913041	RPL15	3	23916591	23924374	1	ribosomal protein L15 [Source:HGNC Symbol;Acc:HGNC:10306]
ENSG00000175166	0.203841	8.92039	0.58573	0.913041	PSMD2	3	184299198	184309050	1	proteasome 26S subunit, non-ATPase 2 [Source:HGNC Symbol;Acc:HGNC:9559]
ENSG00000177192	0.220175	6.85664	0.575712	0.913041	PUS1	12	131929200	131945896	1	pseudouridine synthase 1 [Source:HGNC Symbol;Acc:HGNC:15508]
ENSG00000178951	-0.169498	7.75288	0.571935	0.913041	ZBTB7A	19	4043303	4066899	-1	zinc finger and BTB domain containing 7A [Source:HGNC Symbol;Acc:HGNC:18078]
ENSG00000182087	-0.178829	8.72325	0.583212	0.913041	TMEM259	19	1009648	1021179	-1	transmembrane protein 259 [Source:HGNC Symbol;Acc:HGNC:17039]
ENSG00000186350	-0.173039	7.33338	0.574324	0.913041	RXRA	9	134317098	134440585	1	retinoid X receptor alpha [Source:HGNC Symbol;Acc:HGNC:10477]
ENSG00000186635	-0.171222	7.11178	0.580172	0.913041	ARAP1	11	72685069	72793599	-1	ArfGAP with RhoGAP domain, ankyrin repeat and PH domain 1 [Source:HGNC Symbol;Acc:HGNC:16925]
ENSG00000188229	-0.299642	9.50559	0.574652	0.913041	TUBB4B	9	137241287	137243707	1	tubulin beta 4B class IVb [Source:HGNC Symbol;Acc:HGNC:20771]
ENSG00000198793	0.289103	6.7998	0.571989	0.913041	MTOR	1	11106535	11262551	-1	mechanistic target of rapamycin kinase [Source:HGNC Symbol;Acc:HGNC:3942]
ENSG00000205542	0.264472	7.99487	0.579375	0.913041	TMSB4X	X	12975110	12977227	1	thymosin beta 4 X-linked [Source:HGNC Symbol;Acc:HGNC:11881]
ENSG00000214078	-0.179742	8.2663	0.570463	0.913041	CPNE1	20	35626031	35664956	-1	copine 1 [Source:HGNC Symbol;Acc:HGNC:2314]
ENSG00000233927	-0.193259	9.68634	0.580896	0.913041	RPS28	19	8321158	8323340	1	ribosomal protein S28 [Source:HGNC Symbol;Acc:HGNC:10418]
ENSG00000244038	0.171046	9.38031	0.578413	0.913041	DDOST	1	20651767	20661544	-1	dolichyl-diphosphooligosaccharide--protein glycosyltransferase non-catalytic subunit [Source:HGNC Symbol;Acc:HGNC:2728]
ENSG00000130707	-0.188647	8.48374	0.588559	0.913112	ASS1	9	130444961	130501274	1	argininosuccinate synthase 1 [Source:HGNC Symbol;Acc:HGNC:758]
ENSG00000244509	0.244478	6.81923	0.588861	0.913112	APOBEC3C	22	39014257	39020352	1	apolipoprotein B mRNA editing enzyme catalytic subunit 3C [Source:HGNC Symbol;Acc:HGNC:17353]
ENSG00000007376	-0.277733	8.00034	0.590977	0.913188	RPUSD1	16	784974	788397	-1	RNA pseudouridine synthase domain containing 1 [Source:HGNC Symbol;Acc:HGNC:14173]
ENSG00000088888	0.237866	7.83165	0.591175	0.913188	MAVS	20	3846799	3876123	1	mitochondrial antiviral signaling protein [Source:HGNC Symbol;Acc:HGNC:29233]
ENSG00000120889	0.393342	8.40886	0.590157	0.913188	TNFRSF10B	8	23020133	23069031	-1	TNF receptor superfamily member 10b [Source:HGNC Symbol;Acc:HGNC:11905]
ENSG00000159202	0.173994	8.03053	0.590662	0.913188	UBE2Z	17	48908407	48929056	1	ubiquitin conjugating enzyme E2 Z [Source:HGNC Symbol;Acc:HGNC:25847]
ENSG00000172009	-0.245753	8.48703	0.591004	0.913188	THOP1	19	2785503	2815807	1	thimet oligopeptidase 1 [Source:HGNC Symbol;Acc:HGNC:11793]
ENSG00000173457	-0.266278	9.20633	0.589485	0.913188	PPP1R14B	11	64244479	64246943	-1	protein phosphatase 1 regulatory inhibitor subunit 14B [Source:HGNC Symbol;Acc:HGNC:9057]
ENSG00000167977	0.184818	7.08589	0.591732	0.913465	KCTD5	16	2682523	2709030	1	potassium channel tetramerization domain containing 5 [Source:HGNC Symbol;Acc:HGNC:21423]
ENSG00000134250	0.318732	6.80864	0.592189	0.913588	NOTCH2	1	119911553	120100779	-1	notch receptor 2 [Source:HGNC Symbol;Acc:HGNC:7882]
ENSG00000092841	0.188821	7.42428	0.593873	0.914103	MYL6	12	56158346	56163496	1	myosin light chain 6 [Source:HGNC Symbol;Acc:HGNC:7587]
ENSG00000100304	-0.206385	8.73093	0.594525	0.914103	TTLL12	22	43166622	43187134	-1	tubulin tyrosine ligase like 12 [Source:HGNC Symbol;Acc:HGNC:28974]
ENSG00000112033	-0.175135	6.98946	0.59479	0.914103	PPARD	6	35342558	35428191	1	peroxisome proliferator activated receptor delta [Source:HGNC Symbol;Acc:HGNC:9235]
ENSG00000142541	-0.164023	12.2191	0.592907	0.914103	RPL13A	19	49487510	49493057	1	ribosomal protein L13a [Source:HGNC Symbol;Acc:HGNC:10304]
ENSG00000147123	-0.221078	6.86019	0.594098	0.914103	NDUFB11	X	47142216	47145038	-1	NADH:ubiquinone oxidoreductase subunit B11 [Source:HGNC Symbol;Acc:HGNC:20372]
ENSG00000174444	0.183823	11.7124	0.59411	0.914103	RPL4	15	66498015	66524532	-1	ribosomal protein L4 [Source:HGNC Symbol;Acc:HGNC:10353]
ENSG00000137818	-0.172165	10.9378	0.595514	0.914633	RPLP1	15	69452814	69456205	1	ribosomal protein lateral stalk subunit P1 [Source:HGNC Symbol;Acc:HGNC:10372]
ENSG00000005339	0.264712	6.98263	0.597042	0.915139	CREBBP	16	3725054	3880713	-1	CREB binding protein [Source:HGNC Symbol;Acc:HGNC:2348]
ENSG00000006453	0.269972	6.63165	0.603632	0.915139	BAIAP2L1	7	98291650	98401090	-1	BAR/IMD domain containing adaptor protein 2 like 1 [Source:HGNC Symbol;Acc:HGNC:21649]
ENSG00000008988	0.171054	10.0824	0.597625	0.915139	RPS20	8	56067254	56074510	-1	ribosomal protein S20 [Source:HGNC Symbol;Acc:HGNC:10405]
ENSG00000013364	-0.196855	8.45467	0.603542	0.915139	MVP	16	29820394	29848039	1	major vault protein [Source:HGNC Symbol;Acc:HGNC:7531]
ENSG00000044574	0.416463	11.1203	0.601263	0.915139	HSPA5	9	125234853	125241343	-1	heat shock protein family A (Hsp70) member 5 [Source:HGNC Symbol;Acc:HGNC:5238]
ENSG00000070413	-0.152739	7.82023	0.600773	0.915139	DGCR2	22	19036282	19122454	-1	DiGeorge syndrome critical region gene 2 [Source:HGNC Symbol;Acc:HGNC:2845]
ENSG00000074800	-0.271418	12.498	0.605224	0.915139	ENO1	1	8861000	8879190	-1	enolase 1 [Source:HGNC Symbol;Acc:HGNC:3350]
ENSG00000075043	-0.200327	7.59968	0.601586	0.915139	KCNQ2	20	63400208	63472677	-1	potassium voltage-gated channel subfamily Q member 2 [Source:HGNC Symbol;Acc:HGNC:6296]
ENSG00000084092	-0.198555	7.33926	0.60173	0.915139	NOA1	4	56963350	56977606	-1	nitric oxide associated 1 [Source:HGNC Symbol;Acc:HGNC:28473]
ENSG00000101365	0.168948	7.07366	0.604533	0.915139	IDH3B	20	2658395	2664219	-1	isocitrate dehydrogenase (NAD(+)) 3 non-catalytic subunit beta [Source:HGNC Symbol;Acc:HGNC:5385]
ENSG00000101439	-0.255635	8.69931	0.600008	0.915139	CST3	20	23626706	23638473	-1	cystatin C [Source:HGNC Symbol;Acc:HGNC:2475]
ENSG00000105732	-0.307525	6.75216	0.602615	0.915139	ZNF574	19	42068477	42081552	1	zinc finger protein 574 [Source:HGNC Symbol;Acc:HGNC:26166]
ENSG00000108344	-0.189338	8.59737	0.598296	0.915139	PSMD3	17	39980807	39997959	1	proteasome 26S subunit, non-ATPase 3 [Source:HGNC Symbol;Acc:HGNC:9560]
ENSG00000114115	0.168165	7.13846	0.605204	0.915139	RBP1	3	139517434	139539829	-1	retinol binding protein 1 [Source:HGNC Symbol;Acc:HGNC:9919]
ENSG00000126432	-0.171379	8.95769	0.599639	0.915139	PRDX5	11	64318121	64321811	1	peroxiredoxin 5 [Source:HGNC Symbol;Acc:HGNC:9355]
ENSG00000132589	-0.24784	7.68944	0.603345	0.915139	FLOT2	17	28879335	28897733	-1	flotillin 2 [Source:HGNC Symbol;Acc:HGNC:3758]
ENSG00000140983	-0.158979	7.25244	0.598244	0.915139	RHOT2	16	668105	674174	1	ras homolog family member T2 [Source:HGNC Symbol;Acc:HGNC:21169]
ENSG00000149480	0.169609	7.46828	0.601502	0.915139	MTA2	11	62593214	62601865	-1	metastasis associated 1 family member 2 [Source:HGNC Symbol;Acc:HGNC:7411]
ENSG00000156453	-0.182202	7.16914	0.605301	0.915139	PCDH1	5	141853090	141879246	-1	protocadherin 1 [Source:HGNC Symbol;Acc:HGNC:8655]
ENSG00000163931	-0.229702	10.4767	0.597427	0.915139	TKT	3	53224712	53256052	-1	transketolase [Source:HGNC Symbol;Acc:HGNC:11834]
ENSG00000167747	-0.193304	8.07507	0.604161	0.915139	C19orf48	19	50797704	50804929	-1	chromosome 19 open reading frame 48 [Source:HGNC Symbol;Acc:HGNC:29667]
ENSG00000177239	-0.161841	7.26374	0.603726	0.915139	MAN1B1	9	137086985	137109183	1	mannosidase alpha class 1B member 1 [Source:HGNC Symbol;Acc:HGNC:6823]
ENSG00000185627	0.172267	7.54377	0.601147	0.915139	PSMD13	11	236966	252984	1	proteasome 26S subunit, non-ATPase 13 [Source:HGNC Symbol;Acc:HGNC:9558]
ENSG00000196205	0.212369	7.1806	0.605154	0.915139	EEF1A1P5	9	133019486	133020874	1	eukaryotic translation elongation factor 1 alpha 1 pseudogene 5 [Source:HGNC Symbol;Acc:HGNC:3200]
ENSG00000275700	0.177418	7.15786	0.598951	0.915139	AATF	17	36948954	37056871	1	apoptosis antagonizing transcription factor [Source:HGNC Symbol;Acc:HGNC:19235]
ENSG00000198700	0.218358	6.78384	0.606113	0.915794	IPO9	1	201829149	201884291	1	importin 9 [Source:HGNC Symbol;Acc:HGNC:19425]
ENSG00000141756	-0.191418	7.69387	0.606737	0.916166	FKBP10	17	41812680	41823213	1	FKBP prolyl isomerase 10 [Source:HGNC Symbol;Acc:HGNC:18169]
ENSG00000100599	-0.220477	6.67051	0.60753	0.916791	RIN3	14	92513781	92688994	1	Ras and Rab interactor 3 [Source:HGNC Symbol;Acc:HGNC:18751]
ENSG00000105677	-0.193999	7.15416	0.60801	0.916943	TMEM147	19	35545600	35547526	1	transmembrane protein 147 [Source:HGNC Symbol;Acc:HGNC:30414]
ENSG00000005206	-0.247487	6.82982	0.611537	0.917008	SPPL2B	19	2328615	2355095	1	signal peptide peptidase like 2B [Source:HGNC Symbol;Acc:HGNC:30627]
ENSG00000006327	-0.249346	8.69034	0.608762	0.917008	TNFRSF12A	16	3018445	3022383	1	TNF receptor superfamily member 12A [Source:HGNC Symbol;Acc:HGNC:18152]
ENSG00000078808	-0.160949	8.70255	0.611127	0.917008	SDF4	1	1216909	1232067	-1	stromal cell derived factor 4 [Source:HGNC Symbol;Acc:HGNC:24188]
ENSG00000099364	-0.172228	7.52074	0.613185	0.917008	FBXL19	16	30923055	30948783	1	F-box and leucine rich repeat protein 19 [Source:HGNC Symbol;Acc:HGNC:25300]
ENSG00000105447	-0.251845	7.41723	0.613275	0.917008	GRWD1	19	48445841	48457022	1	glutamate rich WD repeat containing 1 [Source:HGNC Symbol;Acc:HGNC:21270]
ENSG00000111481	0.159234	7.94938	0.613178	0.917008	COPZ1	12	54301202	54351846	1	COPI coat complex subunit zeta 1 [Source:HGNC Symbol;Acc:HGNC:2243]
ENSG00000127463	0.224255	7.33786	0.61168	0.917008	EMC1	1	19215660	19251527	-1	ER membrane protein complex subunit 1 [Source:HGNC Symbol;Acc:HGNC:28957]
ENSG00000127616	-0.147661	8.23123	0.613361	0.917008	SMARCA4	19	10960932	11079426	1	SWI/SNF related, matrix associated, actin dependent regulator of chromatin, subfamily a, member 4 [Source:HGNC Symbol;Acc:HGNC:11100]
ENSG00000156860	-0.169117	7.79543	0.612234	0.917008	FBRS	16	30658431	30670810	1	fibrosin [Source:HGNC Symbol;Acc:HGNC:20442]
ENSG00000161013	-0.167332	8.36108	0.610287	0.917008	MGAT4B	5	179797597	179806952	-1	alpha-1,3-mannosyl-glycoprotein 4-beta-N-acetylglucosaminyltransferase B [Source:HGNC Symbol;Acc:HGNC:7048]
ENSG00000164078	-0.265114	6.78535	0.609346	0.917008	MST1R	3	49887002	49903873	-1	macrophage stimulating 1 receptor [Source:HGNC Symbol;Acc:HGNC:7381]
ENSG00000168268	-0.25556	7.94518	0.609156	0.917008	NT5DC2	3	52524385	52535054	-1	5'-nucleotidase domain containing 2 [Source:HGNC Symbol;Acc:HGNC:25717]
ENSG00000182095	-0.194385	9.48844	0.612536	0.917008	TNRC18	7	5306790	5425414	-1	trinucleotide repeat containing 18 [Source:HGNC Symbol;Acc:HGNC:11962]
ENSG00000196363	0.177029	6.96401	0.611149	0.917008	WDR5	9	134135365	134159968	1	WD repeat domain 5 [Source:HGNC Symbol;Acc:HGNC:12757]
ENSG00000125968	-0.15931	9.16548	0.613983	0.917372	ID1	20	31605283	31606515	1	inhibitor of DNA binding 1, HLH protein [Source:HGNC Symbol;Acc:HGNC:5360]
ENSG00000105202	-0.171898	8.76935	0.616092	0.91882	FBL	19	39834458	39846379	-1	fibrillarin [Source:HGNC Symbol;Acc:HGNC:3599]
ENSG00000148303	-0.181588	11.0324	0.615677	0.91882	RPL7A	9	133348218	133351426	1	ribosomal protein L7a [Source:HGNC Symbol;Acc:HGNC:10364]
ENSG00000172053	-0.167464	8.4274	0.616061	0.91882	QARS1	3	49095932	49105130	-1	glutaminyl-tRNA synthetase 1 [Source:HGNC Symbol;Acc:HGNC:9751]
ENSG00000090316	0.18226	7.37908	0.617536	0.920026	MAEA	4	1289887	1340147	1	macrophage erythroblast attacher, E3 ubiquitin ligase [Source:HGNC Symbol;Acc:HGNC:13731]
ENSG00000142230	0.144862	8.52845	0.617661	0.920026	SAE1	19	47113274	47210636	1	SUMO1 activating enzyme subunit 1 [Source:HGNC Symbol;Acc:HGNC:30660]
ENSG00000197457	-0.145512	8.36414	0.618044	0.920029	STMN3	20	63639705	63657682	-1	stathmin 3 [Source:HGNC Symbol;Acc:HGNC:15926]
ENSG00000100129	0.14693	8.10733	0.62043	0.921314	EIF3L	22	37848868	37889407	1	eukaryotic translation initiation factor 3 subunit L [Source:HGNC Symbol;Acc:HGNC:18138]
ENSG00000122140	-0.223055	7.19636	0.619831	0.921314	MRPS2	9	135499984	135504673	1	mitochondrial ribosomal protein S2 [Source:HGNC Symbol;Acc:HGNC:14495]
ENSG00000154217	-0.179049	7.10969	0.620004	0.921314	PITPNC1	17	67377281	67697261	1	phosphatidylinositol transfer protein cytoplasmic 1 [Source:HGNC Symbol;Acc:HGNC:21045]
ENSG00000198242	-0.185356	8.57516	0.620102	0.921314	RPL23A	17	28719985	28724359	1	ribosomal protein L23a [Source:HGNC Symbol;Acc:HGNC:10317]
ENSG00000169230	-0.268761	7.99297	0.621842	0.922844	PRELID1	5	177303799	177306949	1	PRELI domain containing 1 [Source:HGNC Symbol;Acc:HGNC:30255]
ENSG00000116337	-0.169985	6.87266	0.622591	0.922861	AMPD2	1	109616104	109632053	1	adenosine monophosphate deaminase 2 [Source:HGNC Symbol;Acc:HGNC:469]
ENSG00000126456	-0.165293	6.87712	0.622617	0.922861	IRF3	19	49659569	49665875	-1	interferon regulatory factor 3 [Source:HGNC Symbol;Acc:HGNC:6118]
ENSG00000082641	0.303915	8.88826	0.623408	0.923468	NFE2L1	17	48048329	48061545	1	nuclear factor, erythroid 2 like 1 [Source:HGNC Symbol;Acc:HGNC:7781]
ENSG00000002586	-0.201192	6.71816	0.63269	0.924558	CD99	X	2691187	2741309	1	CD99 molecule (Xg blood group) [Source:HGNC Symbol;Acc:HGNC:7082]
ENSG00000068650	0.288897	6.87573	0.628681	0.924558	ATP11A	13	112690329	112887168	1	ATPase phospholipid transporting 11A [Source:HGNC Symbol;Acc:HGNC:13552]
ENSG00000075624	-0.178133	11.9143	0.630312	0.924558	ACTB	7	5526409	5563902	-1	actin beta [Source:HGNC Symbol;Acc:HGNC:132]
ENSG00000095066	0.210568	7.02562	0.627362	0.924558	HOOK2	19	12763003	12872740	-1	hook microtubule tethering protein 2 [Source:HGNC Symbol;Acc:HGNC:19885]
ENSG00000100227	-0.147719	7.59217	0.630923	0.924558	POLDIP3	22	42583721	42614962	-1	DNA polymerase delta interacting protein 3 [Source:HGNC Symbol;Acc:HGNC:23782]
ENSG00000101444	-0.207933	9.4872	0.637548	0.924558	AHCY	20	34280268	34311802	-1	adenosylhomocysteinase [Source:HGNC Symbol;Acc:HGNC:343]
ENSG00000102144	0.230831	9.27294	0.634132	0.924558	PGK1	X	77910739	78129295	1	phosphoglycerate kinase 1 [Source:HGNC Symbol;Acc:HGNC:8896]
ENSG00000104907	-0.15503	7.82703	0.632365	0.924558	TRMT1	19	13104902	13117567	-1	tRNA methyltransferase 1 [Source:HGNC Symbol;Acc:HGNC:25980]
ENSG00000104964	-0.144409	8.40084	0.634547	0.924558	TLE5	19	3052910	3063107	-1	TLE family member 5, transcriptional modulator [Source:HGNC Symbol;Acc:HGNC:307]
ENSG00000110955	0.150397	10.2519	0.632773	0.924558	ATP5F1B	12	56638175	56645984	-1	ATP synthase F1 subunit beta [Source:HGNC Symbol;Acc:HGNC:830]
ENSG00000116717	0.369099	8.33917	0.632292	0.924558	GADD45A	1	67685201	67688334	1	growth arrest and DNA damage inducible alpha [Source:HGNC Symbol;Acc:HGNC:4095]
ENSG00000124535	0.159592	7.57425	0.632849	0.924558	WRNIP1	6	2765393	2786952	1	WRN helicase interacting protein 1 [Source:HGNC Symbol;Acc:HGNC:20876]
ENSG00000126602	-0.183557	8.82755	0.635138	0.924558	TRAP1	16	3651639	3717553	-1	TNF receptor associated protein 1 [Source:HGNC Symbol;Acc:HGNC:16264]
ENSG00000127445	-0.211082	6.71264	0.637573	0.924558	PIN1	19	9835257	9849689	1	peptidylprolyl cis/trans isomerase, NIMA-interacting 1 [Source:HGNC Symbol;Acc:HGNC:8988]
ENSG00000130513	-0.298327	11.2501	0.635885	0.924558	GDF15	19	18374731	18389176	1	growth differentiation factor 15 [Source:HGNC Symbol;Acc:HGNC:30142]
ENSG00000130985	-0.178675	9.72864	0.634732	0.924558	UBA1	X	47190861	47215128	1	ubiquitin like modifier activating enzyme 1 [Source:HGNC Symbol;Acc:HGNC:12469]
ENSG00000138759	0.389023	6.79755	0.62513	0.924558	FRAS1	4	78057323	78544269	1	Fraser extracellular matrix complex subunit 1 [Source:HGNC Symbol;Acc:HGNC:19185]
ENSG00000142534	-0.151299	11.0341	0.635117	0.924558	RPS11	19	49496365	49499708	1	ribosomal protein S11 [Source:HGNC Symbol;Acc:HGNC:10384]
ENSG00000148396	0.176558	7.15113	0.627033	0.924558	SEC16A	9	136440096	136483759	-1	SEC16 homolog A, endoplasmic reticulum export factor [Source:HGNC Symbol;Acc:HGNC:29006]
ENSG00000148843	0.196033	8.40808	0.637265	0.924558	PDCD11	10	103396626	103446294	1	programmed cell death 11 [Source:HGNC Symbol;Acc:HGNC:13408]
ENSG00000155363	-0.149572	7.31793	0.629794	0.924558	MOV10	1	112673141	112700746	1	Mov10 RISC complex RNA helicase [Source:HGNC Symbol;Acc:HGNC:7200]
ENSG00000158435	0.148702	7.04906	0.636585	0.924558	CNOT11	2	101252886	101270316	1	CCR4-NOT transcription complex subunit 11 [Source:HGNC Symbol;Acc:HGNC:25217]
ENSG00000162191	-0.154714	7.45482	0.635709	0.924558	UBXN1	11	62676498	62679117	-1	UBX domain protein 1 [Source:HGNC Symbol;Acc:HGNC:18402]
ENSG00000163902	0.145864	8.6611	0.637903	0.924558	RPN1	3	128619969	128681075	-1	ribophorin I [Source:HGNC Symbol;Acc:HGNC:10381]
ENSG00000164828	0.309946	7.57627	0.63024	0.924558	SUN1	7	816615	896435	1	Sad1 and UNC84 domain containing 1 [Source:HGNC Symbol;Acc:HGNC:18587]
ENSG00000164896	-0.148674	7.14343	0.634945	0.924558	FASTK	7	151076593	151080866	-1	Fas activated serine/threonine kinase [Source:HGNC Symbol;Acc:HGNC:24676]
ENSG00000168453	-0.199091	7.10509	0.625757	0.924558	HR	8	22114419	22133384	-1	HR lysine demethylase and nuclear receptor corepressor [Source:HGNC Symbol;Acc:HGNC:5172]
ENSG00000175061	0.207734	9.2738	0.625253	0.924558	SNHG29	17	16438767	16478678	1	small nucleolar RNA host gene 29 [Source:HGNC Symbol;Acc:HGNC:28619]
ENSG00000177606	0.269435	7.22982	0.628724	0.924558	JUN	1	58776845	58784048	-1	Jun proto-oncogene, AP-1 transcription factor subunit [Source:HGNC Symbol;Acc:HGNC:6204]
ENSG00000178035	-0.167178	9.5384	0.625847	0.924558	IMPDH2	3	49024325	49029447	-1	inosine monophosphate dehydrogenase 2 [Source:HGNC Symbol;Acc:HGNC:6053]
ENSG00000184207	-0.273907	7.23849	0.630939	0.924558	PGP	16	2211593	2214840	-1	phosphoglycolate phosphatase [Source:HGNC Symbol;Acc:HGNC:8909]
ENSG00000196367	0.219384	7.03648	0.635521	0.924558	TRRAP	7	98877933	99050831	1	transformation/transcription domain associated protein [Source:HGNC Symbol;Acc:HGNC:12347]
ENSG00000197956	-0.175225	9.90554	0.634586	0.924558	S100A6	1	153534599	153536244	-1	S100 calcium binding protein A6 [Source:HGNC Symbol;Acc:HGNC:10496]
ENSG00000197982	-0.230531	6.79515	0.637347	0.924558	C1orf122	1	37806979	37809454	1	chromosome 1 open reading frame 122 [Source:HGNC Symbol;Acc:HGNC:24789]
ENSG00000198467	0.147669	8.60997	0.630331	0.924558	TPM2	9	35681992	35690056	-1	tropomyosin 2 [Source:HGNC Symbol;Acc:HGNC:12011]
ENSG00000204560	0.161234	7.0298	0.629142	0.924558	DHX16	6	30653119	30673006	-1	DEAH-box helicase 16 [Source:HGNC Symbol;Acc:HGNC:2739]
ENSG00000089154	-0.152849	9.10216	0.639398	0.925401	GCN1	12	120127202	120194715	-1	GCN1 activator of EIF2AK4 [Source:HGNC Symbol;Acc:HGNC:4199]
ENSG00000099917	-0.147133	7.52158	0.63976	0.925401	MED15	22	20495913	20587632	1	mediator complex subunit 15 [Source:HGNC Symbol;Acc:HGNC:14248]
ENSG00000108312	0.165695	7.10351	0.641162	0.925401	UBTF	17	44205033	44221626	-1	upstream binding transcription factor [Source:HGNC Symbol;Acc:HGNC:12511]
ENSG00000108639	-0.164829	8.73425	0.640525	0.925401	SYNGR2	17	78168581	78173527	1	synaptogyrin 2 [Source:HGNC Symbol;Acc:HGNC:11499]
ENSG00000126391	0.17173	6.73756	0.640695	0.925401	FRMD8	11	65386621	65413525	1	FERM domain containing 8 [Source:HGNC Symbol;Acc:HGNC:25462]
ENSG00000171680	-0.173523	7.15694	0.64013	0.925401	PLEKHG5	1	6467122	6520074	-1	pleckstrin homology and RhoGEF domain containing G5 [Source:HGNC Symbol;Acc:HGNC:29105]
ENSG00000204628	-0.151366	11.059	0.640827	0.925401	RACK1	5	181236897	181248096	-1	receptor for activated C kinase 1 [Source:HGNC Symbol;Acc:HGNC:4399]
ENSG00000117308	-0.144731	7.4958	0.641916	0.925936	GALE	1	23795599	23800781	-1	UDP-galactose-4-epimerase [Source:HGNC Symbol;Acc:HGNC:4116]
ENSG00000075415	0.169069	9.57149	0.644947	0.926168	SLC25A3	12	98593591	98606379	1	solute carrier family 25 member 3 [Source:HGNC Symbol;Acc:HGNC:10989]
ENSG00000089157	-0.179389	12.3493	0.644336	0.926168	RPLP0	12	120196699	120201235	-1	ribosomal protein lateral stalk subunit P0 [Source:HGNC Symbol;Acc:HGNC:10371]
ENSG00000165280	0.152743	8.42565	0.643409	0.926168	VCP	9	35055376	35079926	-1	valosin containing protein [Source:HGNC Symbol;Acc:HGNC:12666]
ENSG00000168066	-0.154739	9.16857	0.64514	0.926168	SF1	11	64764606	64778786	-1	splicing factor 1 [Source:HGNC Symbol;Acc:HGNC:12950]
ENSG00000168924	0.145728	7.51107	0.644903	0.926168	LETM1	4	1811479	1856156	-1	leucine zipper and EF-hand containing transmembrane protein 1 [Source:HGNC Symbol;Acc:HGNC:6556]
ENSG00000169733	-0.179837	7.40773	0.643993	0.926168	RFNG	17	82047902	82051831	-1	RFNG O-fucosylpeptide 3-beta-N-acetylglucosaminyltransferase [Source:HGNC Symbol;Acc:HGNC:9974]
ENSG00000182307	0.137897	7.18549	0.644959	0.926168	C8orf33	8	145052465	145066685	1	chromosome 8 open reading frame 33 [Source:HGNC Symbol;Acc:HGNC:26104]
ENSG00000241878	0.181182	6.74953	0.642751	0.926168	PISD	22	31618491	31662432	-1	phosphatidylserine decarboxylase [Source:HGNC Symbol;Acc:HGNC:8999]
ENSG00000067829	-0.207218	7.24895	0.649826	0.926248	IDH3G	X	153785766	153794523	-1	isocitrate dehydrogenase (NAD(+)) 3 non-catalytic subunit gamma [Source:HGNC Symbol;Acc:HGNC:5386]
ENSG00000070047	-0.147247	7.8502	0.650587	0.926248	PHRF1	11	576470	612222	1	PHD and ring finger domains 1 [Source:HGNC Symbol;Acc:HGNC:24351]
ENSG00000099194	0.222088	10.046	0.656914	0.926248	SCD	10	100347233	100364826	1	stearoyl-CoA desaturase [Source:HGNC Symbol;Acc:HGNC:10571]
ENSG00000099341	-0.161461	8.2399	0.6549	0.926248	PSMD8	19	38374536	38383824	1	proteasome 26S subunit, non-ATPase 8 [Source:HGNC Symbol;Acc:HGNC:9566]
ENSG00000100364	-0.159947	7.71309	0.651359	0.926248	KIAA0930	22	45192244	45240894	-1	KIAA0930 [Source:HGNC Symbol;Acc:HGNC:1314]
ENSG00000104872	-0.155169	6.93049	0.651906	0.926248	PIH1D1	19	49446298	49453497	-1	PIH1 domain containing 1 [Source:HGNC Symbol;Acc:HGNC:26075]
ENSG00000107719	-0.15615	7.35173	0.649286	0.926248	PALD1	10	70478767	70568450	1	phosphatase domain containing paladin 1 [Source:HGNC Symbol;Acc:HGNC:23530]
ENSG00000108518	-0.183751	10.6899	0.651726	0.926248	PFN1	17	4945652	4949061	-1	profilin 1 [Source:HGNC Symbol;Acc:HGNC:8881]
ENSG00000108523	-0.149647	7.05364	0.656887	0.926248	RNF167	17	4940008	4945222	1	ring finger protein 167 [Source:HGNC Symbol;Acc:HGNC:24544]
ENSG00000109089	-0.152706	7.10364	0.647261	0.926248	CDR2L	17	74987632	75005800	1	cerebellar degeneration related protein 2 like [Source:HGNC Symbol;Acc:HGNC:29999]
ENSG00000109472	0.305659	6.70419	0.651993	0.926248	CPE	4	165361194	165498547	1	carboxypeptidase E [Source:HGNC Symbol;Acc:HGNC:2303]
ENSG00000116688	0.142092	7.83935	0.650502	0.926248	MFN2	1	11980181	12015211	1	mitofusin 2 [Source:HGNC Symbol;Acc:HGNC:16877]
ENSG00000123064	-0.160698	8.4504	0.653052	0.926248	DDX54	12	113157173	113185479	-1	DEAD-box helicase 54 [Source:HGNC Symbol;Acc:HGNC:20084]
ENSG00000141526	-0.158309	10.0284	0.652099	0.926248	SLC16A3	17	82228397	82261129	1	solute carrier family 16 member 3 [Source:HGNC Symbol;Acc:HGNC:10924]
ENSG00000142627	-0.195669	10.1363	0.656251	0.926248	EPHA2	1	16124337	16156069	-1	EPH receptor A2 [Source:HGNC Symbol;Acc:HGNC:3386]
ENSG00000142657	0.174496	8.0387	0.649226	0.926248	PGD	1	10398592	10420511	1	phosphogluconate dehydrogenase [Source:HGNC Symbol;Acc:HGNC:8891]
ENSG00000145050	0.174865	6.91092	0.653309	0.926248	MANF	3	51385291	51389397	1	mesencephalic astrocyte derived neurotrophic factor [Source:HGNC Symbol;Acc:HGNC:15461]
ENSG00000159111	-0.157083	7.5002	0.656452	0.926248	MRPL10	17	47823272	47831541	-1	mitochondrial ribosomal protein L10 [Source:HGNC Symbol;Acc:HGNC:14055]
ENSG00000164251	0.269425	7.38017	0.655098	0.926248	F2RL1	5	76818933	76835315	1	F2R like trypsin receptor 1 [Source:HGNC Symbol;Acc:HGNC:3538]
ENSG00000164733	-0.145022	8.8945	0.652787	0.926248	CTSB	8	11842524	11869533	-1	cathepsin B [Source:HGNC Symbol;Acc:HGNC:2527]
ENSG00000167110	0.268307	6.55022	0.653644	0.926248	GOLGA2	9	128255829	128275995	-1	golgin A2 [Source:HGNC Symbol;Acc:HGNC:4425]
ENSG00000170515	0.142246	7.86783	0.648135	0.926248	PA2G4	12	56104537	56113910	1	proliferation-associated 2G4 [Source:HGNC Symbol;Acc:HGNC:8550]
ENSG00000178467	-0.146442	6.96149	0.657066	0.926248	P4HTM	3	48989889	49007153	1	prolyl 4-hydroxylase, transmembrane [Source:HGNC Symbol;Acc:HGNC:28858]
ENSG00000180198	0.137335	7.56065	0.65406	0.926248	RCC1	1	28505943	28539300	1	regulator of chromosome condensation 1 [Source:HGNC Symbol;Acc:HGNC:1913]
ENSG00000180921	-0.177889	9.70067	0.65174	0.926248	FAM83H	8	143723933	143738234	-1	family with sequence similarity 83 member H [Source:HGNC Symbol;Acc:HGNC:24797]
ENSG00000188846	0.139628	10.3032	0.656638	0.926248	RPL14	3	40457292	40468587	1	ribosomal protein L14 [Source:HGNC Symbol;Acc:HGNC:10305]
ENSG00000197958	-0.146657	10.8094	0.651777	0.926248	RPL12	9	127447674	127451406	-1	ribosomal protein L12 [Source:HGNC Symbol;Acc:HGNC:10302]
ENSG00000198755	0.139739	10.4177	0.648925	0.926248	RPL10A	6	35468401	35470785	1	ribosomal protein L10a [Source:HGNC Symbol;Acc:HGNC:10299]
ENSG00000204590	-0.135378	7.33856	0.651136	0.926248	GNL1	6	30541377	30557174	-1	G protein nucleolar 1 (putative) [Source:HGNC Symbol;Acc:HGNC:4413]
ENSG00000205517	-0.214481	6.95171	0.651789	0.926248	RGL3	19	11384341	11419328	-1	ral guanine nucleotide dissociation stimulator like 3 [Source:HGNC Symbol;Acc:HGNC:30282]
ENSG00000221978	0.438523	7.66482	0.652381	0.926248	CCNL2	1	1385711	1399335	-1	cyclin L2 [Source:HGNC Symbol;Acc:HGNC:20570]
ENSG00000166441	0.159894	9.94481	0.657788	0.926726	RPL27A	11	8682788	8714759	1	ribosomal protein L27a [Source:HGNC Symbol;Acc:HGNC:10329]
ENSG00000007520	-0.213352	7.14558	0.659489	0.927351	TSR3	16	1349240	1351878	-1	TSR3 ribosome maturation factor [Source:HGNC Symbol;Acc:HGNC:14175]
ENSG00000071082	0.18161	9.24251	0.661406	0.927351	RPL31	2	101002229	101024032	1	ribosomal protein L31 [Source:HGNC Symbol;Acc:HGNC:10334]
ENSG00000111737	0.160997	6.81734	0.659607	0.927351	RAB35	12	120095099	120117502	-1	RAB35, member RAS oncogene family [Source:HGNC Symbol;Acc:HGNC:9774]
ENSG00000112514	-0.198765	6.90829	0.660994	0.927351	CUTA	6	33416442	33418317	-1	cutA divalent cation tolerance homolog [Source:HGNC Symbol;Acc:HGNC:21101]
ENSG00000129351	0.147699	9.40569	0.660342	0.927351	ILF3	19	10654261	10692417	1	interleukin enhancer binding factor 3 [Source:HGNC Symbol;Acc:HGNC:6038]
ENSG00000164054	-0.156833	7.69287	0.659314	0.927351	SHISA5	3	48467798	48504826	-1	shisa family member 5 [Source:HGNC Symbol;Acc:HGNC:30376]
ENSG00000182158	0.348374	6.24287	0.660724	0.927351	CREB3L2	7	137874979	138002086	-1	cAMP responsive element binding protein 3 like 2 [Source:HGNC Symbol;Acc:HGNC:23720]
ENSG00000198752	0.240562	7.43628	0.661682	0.927351	CDC42BPB	14	102932380	103057549	-1	CDC42 binding protein kinase beta [Source:HGNC Symbol;Acc:HGNC:1738]
ENSG00000249859	-0.154069	7.37956	0.661505	0.927351	PVT1	8	127794526	128187101	1	Pvt1 oncogene [Source:HGNC Symbol;Acc:HGNC:9709]
ENSG00000008838	-0.133804	7.51177	0.687613	0.927822	MED24	17	40019097	40061215	-1	mediator complex subunit 24 [Source:HGNC Symbol;Acc:HGNC:22963]
ENSG00000010278	0.145707	7.73055	0.690365	0.927822	CD9	12	6199715	6238271	1	CD9 molecule [Source:HGNC Symbol;Acc:HGNC:1709]
ENSG00000072195	-0.224313	7.56233	0.670994	0.927822	SPEG	2	219434843	219493629	1	striated muscle enriched protein kinase [Source:HGNC Symbol;Acc:HGNC:16901]
ENSG00000076984	-0.134875	6.95499	0.676675	0.927822	MAP2K7	19	7903843	7914478	1	mitogen-activated protein kinase kinase 7 [Source:HGNC Symbol;Acc:HGNC:6847]
ENSG00000079999	0.142198	7.35181	0.691168	0.927822	KEAP1	19	10486125	10503558	-1	kelch like ECH associated protein 1 [Source:HGNC Symbol;Acc:HGNC:23177]
ENSG00000089248	0.132828	7.10664	0.689676	0.927822	ERP29	12	112013348	112023449	1	endoplasmic reticulum protein 29 [Source:HGNC Symbol;Acc:HGNC:13799]
ENSG00000090097	-0.16621	6.66298	0.673889	0.927822	PCBP4	3	51957454	51974016	-1	poly(rC) binding protein 4 [Source:HGNC Symbol;Acc:HGNC:8652]
ENSG00000099942	0.179841	7.18399	0.675108	0.927822	CRKL	22	20917407	20953747	1	CRK like proto-oncogene, adaptor protein [Source:HGNC Symbol;Acc:HGNC:2363]
ENSG00000100401	-0.140277	8.69851	0.675657	0.927822	RANGAP1	22	41244779	41286187	-1	Ran GTPase activating protein 1 [Source:HGNC Symbol;Acc:HGNC:9854]
ENSG00000101104	0.588465	6.6961	0.675792	0.927822	PABPC1L	20	44910060	44959035	1	poly(A) binding protein cytoplasmic 1 like [Source:HGNC Symbol;Acc:HGNC:15797]
ENSG00000101199	-0.119543	7.90005	0.686845	0.927822	ARFGAP1	20	63272785	63289790	1	ADP ribosylation factor GTPase activating protein 1 [Source:HGNC Symbol;Acc:HGNC:15852]
ENSG00000101210	-0.242566	11.7414	0.67688	0.927822	EEF1A2	20	63488013	63499239	-1	eukaryotic translation elongation factor 1 alpha 2 [Source:HGNC Symbol;Acc:HGNC:3192]
ENSG00000102119	-0.137289	7.23523	0.688424	0.927822	EMD	X	154379273	154381523	1	emerin [Source:HGNC Symbol;Acc:HGNC:3331]
ENSG00000103222	0.152325	7.90091	0.676223	0.927822	ABCC1	16	15949138	16143257	1	ATP binding cassette subfamily C member 1 [Source:HGNC Symbol;Acc:HGNC:51]
ENSG00000103257	-0.256359	11.5377	0.681936	0.927822	SLC7A5	16	87830023	87869507	-1	solute carrier family 7 member 5 [Source:HGNC Symbol;Acc:HGNC:11063]
ENSG00000103423	0.171397	7.61528	0.680012	0.927822	DNAJA3	16	4425805	4456775	1	DnaJ heat shock protein family (Hsp40) member A3 [Source:HGNC Symbol;Acc:HGNC:11808]
ENSG00000104824	0.12496	8.34903	0.681829	0.927822	HNRNPL	19	38836388	38852347	-1	heterogeneous nuclear ribonucleoprotein L [Source:HGNC Symbol;Acc:HGNC:5045]
ENSG00000104980	0.146582	7.38449	0.688104	0.927822	TIMM44	19	7926718	7943667	-1	translocase of inner mitochondrial membrane 44 [Source:HGNC Symbol;Acc:HGNC:17316]
ENSG00000105438	-0.141479	8.09895	0.67949	0.927822	KDELR1	19	48382575	48391551	-1	KDEL endoplasmic reticulum protein retention receptor 1 [Source:HGNC Symbol;Acc:HGNC:6304]
ENSG00000106636	0.132673	7.57697	0.668567	0.927822	YKT6	7	44200959	44214294	1	YKT6 v-SNARE homolog [Source:HGNC Symbol;Acc:HGNC:16959]
ENSG00000107263	0.131423	7.06727	0.688107	0.927822	RAPGEF1	9	131576770	131740074	-1	Rap guanine nucleotide exchange factor 1 [Source:HGNC Symbol;Acc:HGNC:4568]
ENSG00000108846	0.309121	7.17168	0.690712	0.927822	ABCC3	17	50634777	50692253	1	ATP binding cassette subfamily C member 3 [Source:HGNC Symbol;Acc:HGNC:54]
ENSG00000109065	0.204635	6.63852	0.684146	0.927822	NAT9	17	74770529	74776367	-1	N-acetyltransferase 9 (putative) [Source:HGNC Symbol;Acc:HGNC:23133]
ENSG00000110057	-0.182252	7.73517	0.684713	0.927822	UNC93B1	11	67991100	68004982	-1	unc-93 homolog B1, TLR signaling regulator [Source:HGNC Symbol;Acc:HGNC:13481]
ENSG00000111321	-0.1372	8.18696	0.677071	0.927822	LTBR	12	6375045	6391571	1	lymphotoxin beta receptor [Source:HGNC Symbol;Acc:HGNC:6718]
ENSG00000113758	-0.143198	8.92406	0.687981	0.927822	DBN1	5	177456608	177474401	-1	drebrin 1 [Source:HGNC Symbol;Acc:HGNC:2695]
ENSG00000116604	-0.174378	6.8965	0.679711	0.927822	MEF2D	1	156463727	156500779	-1	myocyte enhancer factor 2D [Source:HGNC Symbol;Acc:HGNC:6997]
ENSG00000117713	0.188734	7.20339	0.671946	0.927822	ARID1A	1	26693236	26782104	1	AT-rich interaction domain 1A [Source:HGNC Symbol;Acc:HGNC:11110]
ENSG00000118181	0.245449	9.13025	0.666223	0.927822	RPS25	11	119015712	119018691	-1	ribosomal protein S25 [Source:HGNC Symbol;Acc:HGNC:10413]
ENSG00000120885	0.203968	8.04287	0.688416	0.927822	CLU	8	27596917	27614700	-1	clusterin [Source:HGNC Symbol;Acc:HGNC:2095]
ENSG00000122203	0.157723	7.08079	0.673414	0.927822	KIAA1191	5	176346062	176361807	-1	KIAA1191 [Source:HGNC Symbol;Acc:HGNC:29209]
ENSG00000122515	-0.126284	8.15163	0.690895	0.927822	ZMIZ2	7	44748581	44769881	1	zinc finger MIZ-type containing 2 [Source:HGNC Symbol;Acc:HGNC:22229]
ENSG00000127481	0.183767	8.14983	0.687781	0.927822	UBR4	1	19074510	19210266	-1	ubiquitin protein ligase E3 component n-recognin 4 [Source:HGNC Symbol;Acc:HGNC:30313]
ENSG00000128272	0.222654	9.37738	0.68786	0.927822	ATF4	22	39519672	39522683	1	activating transcription factor 4 [Source:HGNC Symbol;Acc:HGNC:786]
ENSG00000130402	-0.135475	10.9309	0.666264	0.927822	ACTN4	19	38647649	38731589	1	actinin alpha 4 [Source:HGNC Symbol;Acc:HGNC:166]
ENSG00000130520	-0.157365	8.65782	0.690164	0.927822	LSM4	19	18306236	18323112	-1	LSM4 homolog, U6 small nuclear RNA and mRNA degradation associated [Source:HGNC Symbol;Acc:HGNC:17259]
ENSG00000131446	-0.145004	7.4831	0.679857	0.927822	MGAT1	5	180784780	180815652	-1	alpha-1,3-mannosyl-glycoprotein 2-beta-N-acetylglucosaminyltransferase [Source:HGNC Symbol;Acc:HGNC:7044]
ENSG00000132254	0.128281	7.26509	0.669654	0.927822	ARFIP2	11	6474683	6481479	-1	ADP ribosylation factor interacting protein 2 [Source:HGNC Symbol;Acc:HGNC:17160]
ENSG00000133313	0.119383	7.22688	0.689718	0.927822	CNDP2	18	74495816	74523454	1	carnosine dipeptidase 2 [Source:HGNC Symbol;Acc:HGNC:24437]
ENSG00000136720	-0.133026	7.10663	0.690076	0.927822	HS6ST1	2	128236716	128318868	-1	heparan sulfate 6-O-sulfotransferase 1 [Source:HGNC Symbol;Acc:HGNC:5201]
ENSG00000137207	-0.122573	7.1901	0.683129	0.927822	YIPF3	6	43511832	43516985	-1	Yip1 domain family member 3 [Source:HGNC Symbol;Acc:HGNC:21023]
ENSG00000141349	-0.188589	7.06101	0.667204	0.927822	G6PC3	17	44070735	44076344	1	glucose-6-phosphatase catalytic subunit 3 [Source:HGNC Symbol;Acc:HGNC:24861]
ENSG00000141503	-0.130611	8.29118	0.664399	0.927822	MINK1	17	4833340	4898061	1	misshapen like kinase 1 [Source:HGNC Symbol;Acc:HGNC:17565]
ENSG00000143774	-0.175713	8.01342	0.679953	0.927822	GUK1	1	228139962	228148984	1	guanylate kinase 1 [Source:HGNC Symbol;Acc:HGNC:4693]
ENSG00000145592	0.193518	8.67933	0.680705	0.927822	RPL37	5	40825262	40835222	-1	ribosomal protein L37 [Source:HGNC Symbol;Acc:HGNC:10347]
ENSG00000146072	0.173998	7.17234	0.668695	0.927822	TNFRSF21	6	47231532	47309905	-1	TNF receptor superfamily member 21 [Source:HGNC Symbol;Acc:HGNC:13469]
ENSG00000146648	0.28166	6.77398	0.674152	0.927822	EGFR	7	55019017	55211628	1	epidermal growth factor receptor [Source:HGNC Symbol;Acc:HGNC:3236]
ENSG00000153551	-0.120244	7.18184	0.691085	0.927822	CMTM7	3	32391698	32483067	1	CKLF like MARVEL transmembrane domain containing 7 [Source:HGNC Symbol;Acc:HGNC:19178]
ENSG00000159692	-0.14079	7.76006	0.663956	0.927822	CTBP1	4	1211445	1249953	-1	C-terminal binding protein 1 [Source:HGNC Symbol;Acc:HGNC:2494]
ENSG00000160014	-0.154409	8.92323	0.681303	0.927822	CALM3	19	46601074	46610782	1	calmodulin 3 [Source:HGNC Symbol;Acc:HGNC:1449]
ENSG00000161714	-0.170421	9.39132	0.66309	0.927822	PLCD3	17	45108959	45133354	-1	phospholipase C delta 3 [Source:HGNC Symbol;Acc:HGNC:9061]
ENSG00000162344	-0.244663	7.3632	0.688536	0.927822	FGF19	11	69698238	69704022	-1	fibroblast growth factor 19 [Source:HGNC Symbol;Acc:HGNC:3675]
ENSG00000162496	0.171132	6.79963	0.673259	0.927822	DHRS3	1	12567910	12618210	-1	dehydrogenase/reductase 3 [Source:HGNC Symbol;Acc:HGNC:17693]
ENSG00000162591	-0.278347	7.89084	0.672106	0.927822	MEGF6	1	3487951	3611508	-1	multiple EGF like domains 6 [Source:HGNC Symbol;Acc:HGNC:3232]
ENSG00000164889	-0.187132	8.86294	0.678118	0.927822	SLC4A2	7	151057210	151076526	1	solute carrier family 4 member 2 [Source:HGNC Symbol;Acc:HGNC:11028]
ENSG00000166851	-0.239723	7.31987	0.677589	0.927822	PLK1	16	23677656	23690367	1	polo like kinase 1 [Source:HGNC Symbol;Acc:HGNC:9077]
ENSG00000167085	0.139875	8.35904	0.689577	0.927822	PHB	17	49404052	49414901	-1	prohibitin [Source:HGNC Symbol;Acc:HGNC:8912]
ENSG00000167553	-0.177991	8.25713	0.690361	0.927822	TUBA1C	12	49188736	49274600	1	tubulin alpha 1c [Source:HGNC Symbol;Acc:HGNC:20768]
ENSG00000167967	-0.146244	6.85873	0.670852	0.927822	E4F1	16	2223580	2235742	1	E4F transcription factor 1 [Source:HGNC Symbol;Acc:HGNC:3121]
ENSG00000168528	-0.159657	8.60502	0.686056	0.927822	SERINC2	1	31409565	31434680	1	serine incorporator 2 [Source:HGNC Symbol;Acc:HGNC:23231]
ENSG00000169689	-0.202192	6.99346	0.676239	0.927822	CENPX	17	82018702	82024107	-1	centromere protein X [Source:HGNC Symbol;Acc:HGNC:11422]
ENSG00000170315	-0.142301	8.90054	0.687933	0.927822	UBB	17	16380798	16382745	1	ubiquitin B [Source:HGNC Symbol;Acc:HGNC:12463]
ENSG00000171314	0.22946	8.72125	0.67989	0.927822	PGAM1	10	97426191	97433444	1	phosphoglycerate mutase 1 [Source:HGNC Symbol;Acc:HGNC:8888]
ENSG00000173113	-0.146169	7.93783	0.671801	0.927822	TRMT112	11	64316460	64317559	-1	tRNA methyltransferase subunit 11-2 [Source:HGNC Symbol;Acc:HGNC:26940]
ENSG00000175334	-0.140962	7.92935	0.683592	0.927822	BANF1	11	66002228	66004149	1	BAF nuclear assembly factor 1 [Source:HGNC Symbol;Acc:HGNC:17397]
ENSG00000177731	-0.145662	8.95915	0.665478	0.927822	FLII	17	18244815	18258738	-1	FLII actin remodeling protein [Source:HGNC Symbol;Acc:HGNC:3750]
ENSG00000177963	-0.138942	6.92351	0.666253	0.927822	RIC8A	11	207511	215113	1	RIC8 guanine nucleotide exchange factor A [Source:HGNC Symbol;Acc:HGNC:29550]
ENSG00000178209	-0.169419	11.7417	0.6788	0.927822	PLEC	8	143915153	143976734	-1	plectin [Source:HGNC Symbol;Acc:HGNC:9069]
ENSG00000179134	-0.126175	7.9833	0.664322	0.927822	SAMD4B	19	39342396	39385710	1	sterile alpha motif domain containing 4B [Source:HGNC Symbol;Acc:HGNC:25492]
ENSG00000182944	0.152307	8.41364	0.671501	0.927822	EWSR1	22	29268009	29300525	1	EWS RNA binding protein 1 [Source:HGNC Symbol;Acc:HGNC:3508]
ENSG00000187954	-0.12409	7.17636	0.686432	0.927822	CYHR1	8	144449582	144465667	-1	cysteine and histidine rich 1 [Source:HGNC Symbol;Acc:HGNC:17806]
ENSG00000196352	0.359563	6.27155	0.662915	0.927822	CD55	1	207321532	207386804	1	CD55 molecule (Cromer blood group) [Source:HGNC Symbol;Acc:HGNC:2665]
ENSG00000196419	0.15335	9.62766	0.66689	0.927822	XRCC6	22	41621163	41664048	1	X-ray repair cross complementing 6 [Source:HGNC Symbol;Acc:HGNC:4055]
ENSG00000197136	-0.134537	7.88067	0.672951	0.927822	PCNX3	11	65615773	65637439	1	pecanex 3 [Source:HGNC Symbol;Acc:HGNC:18760]
ENSG00000204237	-0.1533	6.83797	0.677402	0.927822	OXLD1	17	81665036	81666635	-1	oxidoreductase like domain containing 1 [Source:HGNC Symbol;Acc:HGNC:27901]
ENSG00000213024	0.130533	6.99721	0.679246	0.927822	NUP62	19	49906825	49929763	-1	nucleoporin 62 [Source:HGNC Symbol;Acc:HGNC:8066]
ENSG00000138073	-0.124044	7.06446	0.692406	0.928453	PREB	2	27130756	27134666	-1	prolactin regulatory element binding [Source:HGNC Symbol;Acc:HGNC:9356]
ENSG00000154518	0.15089	7.49862	0.692355	0.928453	ATP5MC3	2	175176258	175181710	-1	ATP synthase membrane subunit c locus 3 [Source:HGNC Symbol;Acc:HGNC:843]
ENSG00000076108	0.218118	7.15198	0.694078	0.928869	BAZ2A	12	56595596	56636816	-1	bromodomain adjacent to zinc finger domain 2A [Source:HGNC Symbol;Acc:HGNC:962]
ENSG00000125148	-0.129836	8.7704	0.694182	0.928869	MT2A	16	56608584	56609497	1	metallothionein 2A [Source:HGNC Symbol;Acc:HGNC:7406]
ENSG00000125743	0.126591	8.01896	0.695426	0.928869	SNRPD2	19	45687454	45692569	-1	small nuclear ribonucleoprotein D2 polypeptide [Source:HGNC Symbol;Acc:HGNC:11159]
ENSG00000126067	0.138284	7.78263	0.695034	0.928869	PSMB2	1	35599541	35641526	-1	proteasome 20S subunit beta 2 [Source:HGNC Symbol;Acc:HGNC:9539]
ENSG00000131469	0.128602	9.76841	0.694791	0.928869	RPL27	17	42998273	43002959	1	ribosomal protein L27 [Source:HGNC Symbol;Acc:HGNC:10328]
ENSG00000165804	-0.234465	7.18434	0.69457	0.928869	ZNF219	14	21090077	21104722	-1	zinc finger protein 219 [Source:HGNC Symbol;Acc:HGNC:13011]
ENSG00000173442	-0.137422	7.82229	0.695788	0.928869	EHBP1L1	11	65576046	65592650	1	EH domain binding protein 1 like 1 [Source:HGNC Symbol;Acc:HGNC:30682]
ENSG00000185000	-0.144501	7.45524	0.695441	0.928869	DGAT1	8	144314584	144326910	-1	diacylglycerol O-acyltransferase 1 [Source:HGNC Symbol;Acc:HGNC:2843]
ENSG00000188643	-0.158682	8.91668	0.696265	0.928993	S100A16	1	153606886	153613145	-1	S100 calcium binding protein A16 [Source:HGNC Symbol;Acc:HGNC:20441]
ENSG00000108604	-0.140502	8.33076	0.697401	0.929739	SMARCD2	17	63832081	63843065	-1	SWI/SNF related, matrix associated, actin dependent regulator of chromatin, subfamily d, member 2 [Source:HGNC Symbol;Acc:HGNC:11107]
ENSG00000125733	-0.118614	7.67504	0.697976	0.929739	TRIP10	19	6737925	6751530	1	thyroid hormone receptor interactor 10 [Source:HGNC Symbol;Acc:HGNC:12304]
ENSG00000136448	0.117238	7.61252	0.697716	0.929739	NMT1	17	44957992	45109016	1	N-myristoyltransferase 1 [Source:HGNC Symbol;Acc:HGNC:7857]
ENSG00000115241	0.112677	8.24647	0.700418	0.929918	PPM1G	2	27381195	27409591	-1	protein phosphatase, Mg2+/Mn2+ dependent 1G [Source:HGNC Symbol;Acc:HGNC:9278]
ENSG00000117394	0.171719	9.52469	0.700122	0.929918	SLC2A1	1	42925353	42958893	-1	solute carrier family 2 member 1 [Source:HGNC Symbol;Acc:HGNC:11005]
ENSG00000135821	0.121874	7.8795	0.699956	0.929918	GLUL	1	182378098	182392206	-1	glutamate-ammonia ligase [Source:HGNC Symbol;Acc:HGNC:4341]
ENSG00000175390	-0.143797	8.50607	0.699731	0.929918	EIF3F	11	7970251	8001862	1	eukaryotic translation initiation factor 3 subunit F [Source:HGNC Symbol;Acc:HGNC:3275]
ENSG00000204592	-0.116923	8.3392	0.698896	0.929918	HLA-E	6	30489509	30494194	1	major histocompatibility complex, class I, E [Source:HGNC Symbol;Acc:HGNC:4962]
ENSG00000233493	-0.301067	6.38178	0.699073	0.929918	TMEM238	19	55379244	55384292	-1	transmembrane protein 238 [Source:HGNC Symbol;Acc:HGNC:40042]
ENSG00000008710	-0.218653	7.59775	0.703255	0.930593	PKD1	16	2088708	2135898	-1	polycystin 1, transient receptor potential channel interacting [Source:HGNC Symbol;Acc:HGNC:9008]
ENSG00000084112	0.252255	7.3738	0.708621	0.930593	SSH1	12	108778191	108857590	-1	slingshot protein phosphatase 1 [Source:HGNC Symbol;Acc:HGNC:30579]
ENSG00000100139	-0.14643	7.11327	0.708579	0.930593	MICALL1	22	37905657	37942822	1	MICAL like 1 [Source:HGNC Symbol;Acc:HGNC:29804]
ENSG00000100726	-0.140028	7.1263	0.703208	0.930593	TELO2	16	1493344	1510457	1	telomere maintenance 2 [Source:HGNC Symbol;Acc:HGNC:29099]
ENSG00000103549	-0.117737	7.02425	0.704065	0.930593	RNF40	16	30761745	30776307	1	ring finger protein 40 [Source:HGNC Symbol;Acc:HGNC:16867]
ENSG00000104825	-0.150558	6.79199	0.704782	0.930593	NFKBIB	19	38899700	38908893	1	NFKB inhibitor beta [Source:HGNC Symbol;Acc:HGNC:7798]
ENSG00000111676	-0.123667	8.53599	0.703399	0.930593	ATN1	12	6924463	6942321	1	atrophin 1 [Source:HGNC Symbol;Acc:HGNC:3033]
ENSG00000123131	0.123855	6.95629	0.707844	0.930593	PRDX4	X	23664262	23686397	1	peroxiredoxin 4 [Source:HGNC Symbol;Acc:HGNC:17169]
ENSG00000128311	-0.161157	6.76352	0.705984	0.930593	TST	22	37010859	37020183	-1	thiosulfate sulfurtransferase [Source:HGNC Symbol;Acc:HGNC:12388]
ENSG00000128965	-0.38259	6.7194	0.703132	0.930593	CHAC1	15	40952962	40956512	1	ChaC glutathione specific gamma-glutamylcyclotransferase 1 [Source:HGNC Symbol;Acc:HGNC:28680]
ENSG00000136942	-0.131151	9.93917	0.706869	0.930593	RPL35	9	124857880	124861981	-1	ribosomal protein L35 [Source:HGNC Symbol;Acc:HGNC:10344]
ENSG00000139514	0.235123	7.95594	0.704294	0.930593	SLC7A1	13	29509414	29595688	-1	solute carrier family 7 member 1 [Source:HGNC Symbol;Acc:HGNC:11057]
ENSG00000141002	-0.113435	8.42442	0.705026	0.930593	TCF25	16	89873570	89913627	1	transcription factor 25 [Source:HGNC Symbol;Acc:HGNC:29181]
ENSG00000155463	0.118263	7.41946	0.705281	0.930593	OXA1L	14	22766522	22773042	1	OXA1L mitochondrial inner membrane protein [Source:HGNC Symbol;Acc:HGNC:8526]
ENSG00000160049	0.162936	7.10047	0.708112	0.930593	DFFA	1	10456522	10472529	-1	DNA fragmentation factor subunit alpha [Source:HGNC Symbol;Acc:HGNC:2772]
ENSG00000165661	0.223455	6.73015	0.706003	0.930593	QSOX2	9	136206333	136245812	-1	quiescin sulfhydryl oxidase 2 [Source:HGNC Symbol;Acc:HGNC:30249]
ENSG00000168028	-0.14431	11.2906	0.707383	0.930593	RPSA	3	39406716	39412542	1	ribosomal protein SA [Source:HGNC Symbol;Acc:HGNC:6502]
ENSG00000169750	-0.192138	7.67526	0.702511	0.930593	RAC3	17	82031678	82034204	1	Rac family small GTPase 3 [Source:HGNC Symbol;Acc:HGNC:9803]
ENSG00000175745	0.200689	6.74527	0.708161	0.930593	NR2F1	5	93583222	93594611	1	nuclear receptor subfamily 2 group F member 1 [Source:HGNC Symbol;Acc:HGNC:7975]
ENSG00000187244	-0.148921	7.44336	0.70773	0.930593	BCAM	19	44809071	44821421	1	basal cell adhesion molecule (Lutheran blood group) [Source:HGNC Symbol;Acc:HGNC:6722]
ENSG00000151929	-0.126646	8.16022	0.709137	0.930766	BAG3	10	119651380	119677819	1	BAG cochaperone 3 [Source:HGNC Symbol;Acc:HGNC:939]
ENSG00000121060	0.198587	8.45942	0.709798	0.931128	TRIM25	17	56836387	56914080	-1	tripartite motif containing 25 [Source:HGNC Symbol;Acc:HGNC:12932]
ENSG00000089693	-0.142001	9.6709	0.710785	0.931918	MLF2	12	6747996	6767475	-1	myeloid leukemia factor 2 [Source:HGNC Symbol;Acc:HGNC:7126]
ENSG00000012232	-0.132754	7.60921	0.712262	0.931941	EXTL3	8	28600469	28755599	1	exostosin like glycosyltransferase 3 [Source:HGNC Symbol;Acc:HGNC:3518]
ENSG00000126012	-0.138747	7.56051	0.71149	0.931941	KDM5C	X	53191321	53225422	-1	lysine demethylase 5C [Source:HGNC Symbol;Acc:HGNC:11114]
ENSG00000167642	-0.117247	8.72298	0.711976	0.931941	SPINT2	19	38244035	38292615	1	serine peptidase inhibitor, Kunitz type 2 [Source:HGNC Symbol;Acc:HGNC:11247]
ENSG00000171206	-0.14906	8.63637	0.712344	0.931941	TRIM8	10	102644479	102658318	1	tripartite motif containing 8 [Source:HGNC Symbol;Acc:HGNC:15579]
ENSG00000022840	0.110777	7.21521	0.71414	0.933321	RNF10	12	120533480	120577588	1	ring finger protein 10 [Source:HGNC Symbol;Acc:HGNC:10055]
ENSG00000114353	-0.130108	8.78592	0.71417	0.933321	GNAI2	3	50226292	50259362	1	G protein subunit alpha i2 [Source:HGNC Symbol;Acc:HGNC:4385]
ENSG00000185813	-0.146365	7.07746	0.715467	0.934511	PCYT2	17	81900958	81911432	-1	phosphate cytidylyltransferase 2, ethanolamine [Source:HGNC Symbol;Acc:HGNC:8756]
ENSG00000178719	-0.125024	8.4523	0.715968	0.93466	GRINA	8	143990056	143993415	1	glutamate ionotropic receptor NMDA type subunit associated protein 1 [Source:HGNC Symbol;Acc:HGNC:4589]
ENSG00000107833	-0.134741	7.56432	0.716579	0.934954	NPM3	10	101781325	101783413	-1	nucleophosmin/nucleoplasmin 3 [Source:HGNC Symbol;Acc:HGNC:7931]
ENSG00000120875	-0.160282	9.22689	0.718127	0.935599	DUSP4	8	29333064	29350684	-1	dual specificity phosphatase 4 [Source:HGNC Symbol;Acc:HGNC:3070]
ENSG00000173638	-0.148315	7.15052	0.718008	0.935599	SLC19A1	21	45493572	45573365	-1	solute carrier family 19 member 1 [Source:HGNC Symbol;Acc:HGNC:10937]
ENSG00000221968	0.156232	7.61519	0.718234	0.935599	FADS3	11	61873519	61892051	-1	fatty acid desaturase 3 [Source:HGNC Symbol;Acc:HGNC:3576]
ENSG00000090861	-0.220279	9.72544	0.721741	0.935617	AARS1	16	70251983	70289707	-1	alanyl-tRNA synthetase 1 [Source:HGNC Symbol;Acc:HGNC:20]
ENSG00000092820	0.154721	11.8186	0.721754	0.935617	EZR	6	158765741	158819368	-1	ezrin [Source:HGNC Symbol;Acc:HGNC:12691]
ENSG00000105726	-0.132241	8.33173	0.721612	0.935617	ATP13A1	19	19645198	19663676	-1	ATPase 13A1 [Source:HGNC Symbol;Acc:HGNC:24215]
ENSG00000125901	-0.121387	6.95785	0.72054	0.935617	MRPS26	20	3046052	3048250	1	mitochondrial ribosomal protein S26 [Source:HGNC Symbol;Acc:HGNC:14045]
ENSG00000141556	-0.178124	7.70005	0.719926	0.935617	TBCD	17	82752065	82945914	1	tubulin folding cofactor D [Source:HGNC Symbol;Acc:HGNC:11581]
ENSG00000161203	0.128336	9.27808	0.723276	0.935617	AP2M1	3	184174689	184184091	1	adaptor related protein complex 2 subunit mu 1 [Source:HGNC Symbol;Acc:HGNC:564]
ENSG00000166508	-0.179597	9.10943	0.719689	0.935617	MCM7	7	100092728	100101940	-1	minichromosome maintenance complex component 7 [Source:HGNC Symbol;Acc:HGNC:6950]
ENSG00000172500	-0.150463	7.043	0.722409	0.935617	FIBP	11	65883740	65888531	-1	FGF1 intracellular binding protein [Source:HGNC Symbol;Acc:HGNC:3705]
ENSG00000175467	-0.1156	7.47464	0.722291	0.935617	SART1	11	65961728	65980137	1	spliceosome associated factor 1, recruiter of U4/U6.U5 tri-snRNP [Source:HGNC Symbol;Acc:HGNC:10538]
ENSG00000185262	-0.176244	7.7389	0.720996	0.935617	UBALD2	17	76265348	76271298	1	UBA like domain containing 2 [Source:HGNC Symbol;Acc:HGNC:28438]
ENSG00000185624	-0.109464	10.7596	0.72264	0.935617	P4HB	17	81843161	81860624	-1	prolyl 4-hydroxylase subunit beta [Source:HGNC Symbol;Acc:HGNC:8548]
ENSG00000197063	0.137288	7.09167	0.722927	0.935617	MAFG	17	81918270	81927735	-1	MAF bZIP transcription factor G [Source:HGNC Symbol;Acc:HGNC:6781]
ENSG00000197157	-0.114274	8.77265	0.719782	0.935617	SND1	7	127652194	128092609	1	staphylococcal nuclease and tudor domain containing 1 [Source:HGNC Symbol;Acc:HGNC:30646]
ENSG00000112655	-0.10434	8.3206	0.72396	0.935632	PTK7	6	43076307	43161719	1	protein tyrosine kinase 7 (inactive) [Source:HGNC Symbol;Acc:HGNC:9618]
ENSG00000133316	-0.12695	7.15221	0.724061	0.935632	WDR74	11	62832342	62841809	-1	WD repeat domain 74 [Source:HGNC Symbol;Acc:HGNC:25529]
ENSG00000177106	0.10833	8.79622	0.724913	0.936233	EPS8L2	11	694438	727727	1	EPS8 like 2 [Source:HGNC Symbol;Acc:HGNC:21296]
ENSG00000072110	-0.104826	9.02502	0.728252	0.937043	ACTN1	14	68874128	68979440	-1	actinin alpha 1 [Source:HGNC Symbol;Acc:HGNC:163]
ENSG00000084207	-0.1805	9.65084	0.727788	0.937043	GSTP1	11	67583742	67586656	1	glutathione S-transferase pi 1 [Source:HGNC Symbol;Acc:HGNC:4638]
ENSG00000116221	-0.145071	7.59203	0.72738	0.937043	MRPL37	1	54184041	54225464	1	mitochondrial ribosomal protein L37 [Source:HGNC Symbol;Acc:HGNC:14034]
ENSG00000125734	-0.115798	6.99493	0.726049	0.937043	GPR108	19	6729914	6737603	-1	G protein-coupled receptor 108 [Source:HGNC Symbol;Acc:HGNC:17829]
ENSG00000125991	-0.121224	8.33885	0.726971	0.937043	ERGIC3	20	35542038	35557634	1	ERGIC and golgi 3 [Source:HGNC Symbol;Acc:HGNC:15927]
ENSG00000171345	-0.14384	12.2052	0.727421	0.937043	KRT19	17	41523617	41528308	-1	keratin 19 [Source:HGNC Symbol;Acc:HGNC:6436]
ENSG00000275342	-0.120483	7.04996	0.728064	0.937043	PRAG1	8	8317736	8386439	-1	PEAK1 related, kinase-activating pseudokinase 1 [Source:HGNC Symbol;Acc:HGNC:25438]
ENSG00000067057	-0.145822	9.28652	0.733078	0.938883	PFKP	10	3066333	3137718	1	phosphofructokinase, platelet [Source:HGNC Symbol;Acc:HGNC:8878]
ENSG00000077549	0.108611	7.90853	0.731476	0.938883	CAPZB	1	19338775	19485539	-1	capping actin protein of muscle Z-line subunit beta [Source:HGNC Symbol;Acc:HGNC:1491]
ENSG00000100991	0.102033	7.16638	0.730969	0.938883	TRPC4AP	20	35002404	35092807	-1	transient receptor potential cation channel subfamily C member 4 associated protein [Source:HGNC Symbol;Acc:HGNC:16181]
ENSG00000127884	0.148471	7.00017	0.732589	0.938883	ECHS1	10	133362485	133373354	-1	enoyl-CoA hydratase, short chain 1 [Source:HGNC Symbol;Acc:HGNC:3151]
ENSG00000131748	-0.115044	6.91129	0.733175	0.938883	STARD3	17	39637090	39664201	1	StAR related lipid transfer domain containing 3 [Source:HGNC Symbol;Acc:HGNC:17579]
ENSG00000135624	0.114258	9.58695	0.731647	0.938883	CCT7	2	73233420	73253021	1	chaperonin containing TCP1 subunit 7 [Source:HGNC Symbol;Acc:HGNC:1622]
ENSG00000167770	-0.132252	7.49122	0.730989	0.938883	OTUB1	11	63985853	64001811	1	OTU deubiquitinase, ubiquitin aldehyde binding 1 [Source:HGNC Symbol;Acc:HGNC:23077]
ENSG00000169188	-0.122167	6.69939	0.733098	0.938883	APEX2	X	55000363	55009057	1	apurinic/apyrimidinic endodeoxyribonuclease 2 [Source:HGNC Symbol;Acc:HGNC:17889]
ENSG00000180879	-0.108656	7.39436	0.732087	0.938883	SSR4	X	153793516	153798499	1	signal sequence receptor subunit 4 [Source:HGNC Symbol;Acc:HGNC:11326]
ENSG00000109321	0.258482	9.47167	0.736183	0.940743	AREG	4	74445136	74455005	1	amphiregulin [Source:HGNC Symbol;Acc:HGNC:651]
ENSG00000141564	-0.104342	7.656	0.736069	0.940743	RPTOR	17	80544819	80966371	1	regulatory associated protein of MTOR complex 1 [Source:HGNC Symbol;Acc:HGNC:30287]
ENSG00000142910	0.103581	8.14835	0.735759	0.940743	TINAGL1	1	31576485	31587686	1	tubulointerstitial nephritis antigen like 1 [Source:HGNC Symbol;Acc:HGNC:19168]
ENSG00000168476	-0.107278	7.16982	0.735617	0.940743	REEP4	8	22138020	22141951	-1	receptor accessory protein 4 [Source:HGNC Symbol;Acc:HGNC:26176]
ENSG00000182899	0.142928	9.44701	0.736727	0.940942	RPL35A	3	197950190	197956610	1	ribosomal protein L35a [Source:HGNC Symbol;Acc:HGNC:10345]
ENSG00000099956	-0.123489	7.6807	0.737273	0.941141	SMARCB1	22	23786931	23838009	1	SWI/SNF related, matrix associated, actin dependent regulator of chromatin, subfamily b, member 1 [Source:HGNC Symbol;Acc:HGNC:11103]
ENSG00000103005	0.107303	7.01186	0.738441	0.941142	USB1	16	57999546	58021618	1	U6 snRNA biogenesis phosphodiesterase 1 [Source:HGNC Symbol;Acc:HGNC:25792]
ENSG00000134107	-0.183532	6.84956	0.73822	0.941142	BHLHE40	3	4979437	4985323	1	basic helix-loop-helix family member e40 [Source:HGNC Symbol;Acc:HGNC:1046]
ENSG00000160216	0.137073	6.81673	0.737778	0.941142	AGPAT3	21	43865223	43987592	1	1-acylglycerol-3-phosphate O-acyltransferase 3 [Source:HGNC Symbol;Acc:HGNC:326]
ENSG00000101160	0.103777	7.91033	0.738978	0.941214	CTSZ	20	58995185	59007254	-1	cathepsin Z [Source:HGNC Symbol;Acc:HGNC:2547]
ENSG00000103335	-0.115403	8.92738	0.739275	0.941214	PIEZO1	16	88715338	88785220	-1	piezo type mechanosensitive ion channel component 1 [Source:HGNC Symbol;Acc:HGNC:28993]
ENSG00000074842	-0.10678	7.94712	0.741001	0.941429	MYDGF	19	4641374	4670362	-1	myeloid derived growth factor [Source:HGNC Symbol;Acc:HGNC:16948]
ENSG00000165916	0.109639	7.77495	0.740306	0.941429	PSMC3	11	47418769	47426473	-1	proteasome 26S subunit, ATPase 3 [Source:HGNC Symbol;Acc:HGNC:9549]
ENSG00000167996	0.134235	10.8841	0.740874	0.941429	FTH1	11	61959718	61967634	-1	ferritin heavy chain 1 [Source:HGNC Symbol;Acc:HGNC:3976]
ENSG00000213719	-0.114966	8.90729	0.740776	0.941429	CLIC1	6	31730581	31739763	-1	chloride intracellular channel 1 [Source:HGNC Symbol;Acc:HGNC:2062]
ENSG00000168439	0.109239	9.09064	0.741602	0.941698	STIP1	11	64185272	64204543	1	stress induced phosphoprotein 1 [Source:HGNC Symbol;Acc:HGNC:11387]
ENSG00000105281	-0.153419	9.13865	0.743381	0.942473	SLC1A5	19	46774883	46788594	-1	solute carrier family 1 member 5 [Source:HGNC Symbol;Acc:HGNC:10943]
ENSG00000114391	0.103108	9.562	0.743023	0.942473	RPL24	3	101681091	101686718	-1	ribosomal protein L24 [Source:HGNC Symbol;Acc:HGNC:10325]
ENSG00000157593	-0.146444	6.80776	0.743234	0.942473	SLC35B2	6	44254096	44257890	-1	solute carrier family 35 member B2 [Source:HGNC Symbol;Acc:HGNC:16872]
ENSG00000102898	0.131092	7.16976	0.744909	0.942571	NUTF2	16	67846923	67872567	1	nuclear transport factor 2 [Source:HGNC Symbol;Acc:HGNC:13722]
ENSG00000131473	0.124912	8.77813	0.744908	0.942571	ACLY	17	41866917	41930542	-1	ATP citrate lyase [Source:HGNC Symbol;Acc:HGNC:115]
ENSG00000154370	-0.148844	6.66783	0.744715	0.942571	TRIM11	1	228393673	228406835	-1	tripartite motif containing 11 [Source:HGNC Symbol;Acc:HGNC:16281]
ENSG00000254986	-0.142593	6.95179	0.745017	0.942571	DPP3	11	66480013	66509657	1	dipeptidyl peptidase 3 [Source:HGNC Symbol;Acc:HGNC:3008]
ENSG00000100348	-0.113719	6.99407	0.746172	0.943539	TXN2	22	36467046	36481640	-1	thioredoxin 2 [Source:HGNC Symbol;Acc:HGNC:17772]
ENSG00000179271	-0.175901	6.55218	0.746761	0.94379	GADD45GIP1	19	12953119	12957223	-1	GADD45G interacting protein 1 [Source:HGNC Symbol;Acc:HGNC:29996]
ENSG00000060237	0.206187	6.64504	0.747463	0.943981	WNK1	12	752579	911452	1	WNK lysine deficient protein kinase 1 [Source:HGNC Symbol;Acc:HGNC:14540]
ENSG00000107862	-0.0960463	7.82878	0.747766	0.943981	GBF1	10	102245371	102382899	1	golgi brefeldin A resistant guanine nucleotide exchange factor 1 [Source:HGNC Symbol;Acc:HGNC:4181]
ENSG00000172046	-0.0956127	7.71593	0.748082	0.943981	USP19	3	49108046	49120938	-1	ubiquitin specific peptidase 19 [Source:HGNC Symbol;Acc:HGNC:12617]
ENSG00000049656	0.0988861	7.60204	0.765831	0.945599	CLPTM1L	5	1317752	1345099	-1	CLPTM1 like [Source:HGNC Symbol;Acc:HGNC:24308]
ENSG00000055950	-0.110092	6.97403	0.759936	0.945599	MRPL43	10	100969458	100987515	-1	mitochondrial ribosomal protein L43 [Source:HGNC Symbol;Acc:HGNC:14517]
ENSG00000058085	0.182097	6.81441	0.765458	0.945599	LAMC2	1	183186238	183245127	1	laminin subunit gamma 2 [Source:HGNC Symbol;Acc:HGNC:6493]
ENSG00000068308	-0.0883465	7.13148	0.765931	0.945599	OTUD5	X	48922024	48958386	-1	OTU deubiquitinase 5 [Source:HGNC Symbol;Acc:HGNC:25402]
ENSG00000069482	-0.120276	7.27381	0.769388	0.945599	GAL	11	68683779	68691175	1	galanin and GMAP prepropeptide [Source:HGNC Symbol;Acc:HGNC:4114]
ENSG00000088826	-0.135608	7.0363	0.764442	0.945599	SMOX	20	4120980	4187747	1	spermine oxidase [Source:HGNC Symbol;Acc:HGNC:15862]
ENSG00000092010	0.108167	7.08983	0.75537	0.945599	PSME1	14	24136163	24138967	1	proteasome activator subunit 1 [Source:HGNC Symbol;Acc:HGNC:9568]
ENSG00000100462	0.107301	6.86271	0.767246	0.945599	PRMT5	14	22920525	22929408	-1	protein arginine methyltransferase 5 [Source:HGNC Symbol;Acc:HGNC:10894]
ENSG00000100804	0.10919	7.58671	0.764284	0.945599	PSMB5	14	23016543	23035230	-1	proteasome 20S subunit beta 5 [Source:HGNC Symbol;Acc:HGNC:9542]
ENSG00000100994	-0.169191	9.25622	0.758053	0.945599	PYGB	20	25248085	25298012	1	glycogen phosphorylase B [Source:HGNC Symbol;Acc:HGNC:9723]
ENSG00000104915	-0.0934224	7.55936	0.759403	0.945599	STX10	19	13144058	13150383	-1	syntaxin 10 [Source:HGNC Symbol;Acc:HGNC:11428]
ENSG00000105429	-0.113864	7.45173	0.761244	0.945599	MEGF8	19	42325609	42378769	1	multiple EGF like domains 8 [Source:HGNC Symbol;Acc:HGNC:3233]
ENSG00000105576	0.117553	7.16114	0.766183	0.945599	TNPO2	19	12699194	12724011	-1	transportin 2 [Source:HGNC Symbol;Acc:HGNC:19998]
ENSG00000106263	0.101986	9.50415	0.771587	0.945599	EIF3B	7	2354086	2380745	1	eukaryotic translation initiation factor 3 subunit B [Source:HGNC Symbol;Acc:HGNC:3280]
ENSG00000106367	0.0896275	7.16161	0.762947	0.945599	AP1S1	7	101154456	101161596	1	adaptor related protein complex 1 subunit sigma 1 [Source:HGNC Symbol;Acc:HGNC:559]
ENSG00000107816	-0.0875437	8.33754	0.770535	0.945599	LZTS2	10	100996618	101007836	1	leucine zipper tumor suppressor 2 [Source:HGNC Symbol;Acc:HGNC:29381]
ENSG00000108773	0.127327	6.67814	0.756607	0.945599	KAT2A	17	42113111	42121367	-1	lysine acetyltransferase 2A [Source:HGNC Symbol;Acc:HGNC:4201]
ENSG00000115234	-0.118331	7.55985	0.758169	0.945599	SNX17	2	27370496	27377535	1	sorting nexin 17 [Source:HGNC Symbol;Acc:HGNC:14979]
ENSG00000117410	-0.115918	7.2855	0.761544	0.945599	ATP6V0B	1	43974487	43978295	1	ATPase H+ transporting V0 subunit b [Source:HGNC Symbol;Acc:HGNC:861]
ENSG00000125503	-0.0974482	7.27875	0.770914	0.945599	PPP1R12C	19	55090914	55117637	-1	protein phosphatase 1 regulatory subunit 12C [Source:HGNC Symbol;Acc:HGNC:14947]
ENSG00000125826	-0.260317	9.68724	0.755528	0.945599	RBCK1	20	407498	432139	1	RANBP2-type and C3HC4-type zinc finger containing 1 [Source:HGNC Symbol;Acc:HGNC:15864]
ENSG00000130311	0.0926383	7.12005	0.770778	0.945599	DDA1	19	17309518	17323298	1	DET1 and DDB1 associated 1 [Source:HGNC Symbol;Acc:HGNC:28360]
ENSG00000130724	-0.0987714	7.13937	0.768711	0.945599	CHMP2A	19	58551566	58555105	-1	charged multivesicular body protein 2A [Source:HGNC Symbol;Acc:HGNC:30216]
ENSG00000131584	-0.105837	6.80271	0.769705	0.945599	ACAP3	1	1292390	1309609	-1	ArfGAP with coiled-coil, ankyrin repeat and PH domains 3 [Source:HGNC Symbol;Acc:HGNC:16754]
ENSG00000133884	-0.0903909	7.18856	0.766214	0.945599	DPF2	11	65333852	65354262	1	double PHD fingers 2 [Source:HGNC Symbol;Acc:HGNC:9964]
ENSG00000135074	-0.158969	7.94981	0.769611	0.945599	ADAM19	5	157395534	157575775	-1	ADAM metallopeptidase domain 19 [Source:HGNC Symbol;Acc:HGNC:197]
ENSG00000135404	0.0927588	8.41424	0.758875	0.945599	CD63	12	55725323	55729707	-1	CD63 molecule [Source:HGNC Symbol;Acc:HGNC:1692]
ENSG00000135506	0.120213	7.0706	0.760106	0.945599	OS9	12	57693955	57721557	1	OS9 endoplasmic reticulum lectin [Source:HGNC Symbol;Acc:HGNC:16994]
ENSG00000135686	0.13064	6.9212	0.770151	0.945599	KLHL36	16	84648511	84667686	1	kelch like family member 36 [Source:HGNC Symbol;Acc:HGNC:17844]
ENSG00000136444	0.155336	6.87563	0.759488	0.945599	RSAD1	17	50478860	50485974	1	radical S-adenosyl methionine domain containing 1 [Source:HGNC Symbol;Acc:HGNC:25634]
ENSG00000136485	0.103881	7.99262	0.753669	0.945599	DCAF7	17	63550477	63594279	1	DDB1 and CUL4 associated factor 7 [Source:HGNC Symbol;Acc:HGNC:30915]
ENSG00000136830	-0.103809	9.51339	0.76669	0.945599	NIBAN2	9	127505339	127578989	-1	niban apoptosis regulator 2 [Source:HGNC Symbol;Acc:HGNC:25282]
ENSG00000138834	-0.130356	7.76653	0.750975	0.945599	MAPK8IP3	16	1706183	1770351	1	mitogen-activated protein kinase 8 interacting protein 3 [Source:HGNC Symbol;Acc:HGNC:6884]
ENSG00000141551	0.0948009	8.08433	0.754384	0.945599	CSNK1D	17	82239023	82273731	-1	casein kinase 1 delta [Source:HGNC Symbol;Acc:HGNC:2452]
ENSG00000141994	-0.154336	6.9069	0.754943	0.945599	DUS3L	19	5784832	5791225	-1	dihydrouridine synthase 3 like [Source:HGNC Symbol;Acc:HGNC:26920]
ENSG00000142634	-0.110315	7.9861	0.762723	0.945599	EFHD2	1	15409888	15430339	1	EF-hand domain family member D2 [Source:HGNC Symbol;Acc:HGNC:28670]
ENSG00000143878	-0.0949138	8.60488	0.768316	0.945599	RHOB	2	20447074	20449440	1	ras homolog family member B [Source:HGNC Symbol;Acc:HGNC:668]
ENSG00000146834	0.115739	6.85619	0.752298	0.945599	MEPCE	7	100428790	100434118	1	methylphosphate capping enzyme [Source:HGNC Symbol;Acc:HGNC:20247]
ENSG00000149273	-0.0968343	11.7607	0.770454	0.945599	RPS3	11	75399515	75422280	1	ribosomal protein S3 [Source:HGNC Symbol;Acc:HGNC:10420]
ENSG00000149418	-0.111061	8.90293	0.756768	0.945599	ST14	11	130159782	130210362	1	ST14 transmembrane serine protease matriptase [Source:HGNC Symbol;Acc:HGNC:11344]
ENSG00000150990	-0.102726	7.44769	0.771646	0.945599	DHX37	12	124946825	124989131	-1	DEAH-box helicase 37 [Source:HGNC Symbol;Acc:HGNC:17210]
ENSG00000159461	0.0986131	7.16264	0.761979	0.945599	AMFR	16	56361452	56425545	-1	autocrine motility factor receptor [Source:HGNC Symbol;Acc:HGNC:463]
ENSG00000160211	-0.150012	7.97581	0.769414	0.945599	G6PD	X	154531391	154547572	-1	glucose-6-phosphate dehydrogenase [Source:HGNC Symbol;Acc:HGNC:4057]
ENSG00000162413	-0.139946	7.45698	0.767088	0.945599	KLHL21	1	6590724	6614607	-1	kelch like family member 21 [Source:HGNC Symbol;Acc:HGNC:29041]
ENSG00000163132	0.0918633	8.39676	0.762671	0.945599	MSX1	4	4859665	4863936	1	msh homeobox 1 [Source:HGNC Symbol;Acc:HGNC:7391]
ENSG00000163814	0.179123	8.9067	0.762344	0.945599	CDCP1	3	45082277	45146422	-1	CUB domain containing protein 1 [Source:HGNC Symbol;Acc:HGNC:24357]
ENSG00000171552	-0.109655	8.53514	0.750534	0.945599	BCL2L1	20	31664452	31723989	-1	BCL2 like 1 [Source:HGNC Symbol;Acc:HGNC:992]
ENSG00000172831	0.10904	6.9099	0.757972	0.945599	CES2	16	66934444	66945096	1	carboxylesterase 2 [Source:HGNC Symbol;Acc:HGNC:1864]
ENSG00000175727	0.113696	7.28369	0.771358	0.945599	MLXIP	12	122078756	122147344	1	MLX interacting protein [Source:HGNC Symbol;Acc:HGNC:17055]
ENSG00000175792	0.0985265	7.75176	0.761295	0.945599	RUVBL1	3	128064778	128153914	-1	RuvB like AAA ATPase 1 [Source:HGNC Symbol;Acc:HGNC:10474]
ENSG00000178741	0.0993241	7.07448	0.770944	0.945599	COX5A	15	74919791	74938083	-1	cytochrome c oxidase subunit 5A [Source:HGNC Symbol;Acc:HGNC:2267]
ENSG00000178982	-0.0917549	7.61264	0.771329	0.945599	EIF3K	19	38619082	38636955	1	eukaryotic translation initiation factor 3 subunit K [Source:HGNC Symbol;Acc:HGNC:24656]
ENSG00000181026	0.0998358	6.95623	0.751152	0.945599	AEN	15	88621337	88632281	1	apoptosis enhancing nuclease [Source:HGNC Symbol;Acc:HGNC:25722]
ENSG00000184840	0.0925448	7.69344	0.763837	0.945599	TMED9	5	177592203	177597242	1	transmembrane p24 trafficking protein 9 [Source:HGNC Symbol;Acc:HGNC:24878]
ENSG00000198728	0.0984074	7.61094	0.761779	0.945599	LDB1	10	102106489	102120368	-1	LIM domain binding 1 [Source:HGNC Symbol;Acc:HGNC:6532]
ENSG00000198840	-0.115973	10.1378	0.76134	0.945599	MT-ND3	MT	10059	10404	1	mitochondrially encoded NADH:ubiquinone oxidoreductase core subunit 3 [Source:HGNC Symbol;Acc:HGNC:7458]
ENSG00000269893	0.214796	6.61984	0.755558	0.945599	SNHG8	4	118278709	118285316	1	small nucleolar RNA host gene 8 [Source:HGNC Symbol;Acc:HGNC:33098]
ENSG00000130204	-0.119257	8.6557	0.772637	0.945855	TOMM40	19	44890569	44903689	1	translocase of outer mitochondrial membrane 40 [Source:HGNC Symbol;Acc:HGNC:18001]
ENSG00000160072	0.112915	7.08512	0.772597	0.945855	ATAD3B	1	1471765	1497848	1	ATPase family AAA domain containing 3B [Source:HGNC Symbol;Acc:HGNC:24007]
ENSG00000223496	-0.135441	6.6051	0.77335	0.946249	EXOSC6	16	70246778	70251940	-1	exosome component 6 [Source:HGNC Symbol;Acc:HGNC:19055]
ENSG00000005022	0.114372	8.81111	0.774065	0.946556	SLC25A5	X	119468422	119471396	1	solute carrier family 25 member 5 [Source:HGNC Symbol;Acc:HGNC:10991]
ENSG00000087274	0.0902552	7.53026	0.77484	0.946556	ADD1	4	2843857	2930076	1	adducin 1 [Source:HGNC Symbol;Acc:HGNC:243]
ENSG00000116260	-0.0871309	7.99355	0.776183	0.946556	QSOX1	1	180154869	180204030	1	quiescin sulfhydryl oxidase 1 [Source:HGNC Symbol;Acc:HGNC:9756]
ENSG00000147955	-0.0899013	7.745	0.775718	0.946556	SIGMAR1	9	34634722	34637809	-1	sigma non-opioid intracellular receptor 1 [Source:HGNC Symbol;Acc:HGNC:8157]
ENSG00000150991	0.106261	10.2381	0.775476	0.946556	UBC	12	124911604	124917368	-1	ubiquitin C [Source:HGNC Symbol;Acc:HGNC:12468]
ENSG00000167657	-0.0950044	7.23241	0.77634	0.946556	DAPK3	19	3958453	3971123	-1	death associated protein kinase 3 [Source:HGNC Symbol;Acc:HGNC:2676]
ENSG00000205903	-0.09835	7.19778	0.775075	0.946556	ZNF316	7	6637318	6658279	1	zinc finger protein 316 [Source:HGNC Symbol;Acc:HGNC:13843]
ENSG00000090273	0.106532	8.19852	0.777727	0.947586	NUDC	1	26900238	26946871	1	nuclear distribution C, dynein complex regulator [Source:HGNC Symbol;Acc:HGNC:8045]
ENSG00000167548	0.17915	7.17629	0.777968	0.947586	KMT2D	12	49018978	49060794	-1	lysine methyltransferase 2D [Source:HGNC Symbol;Acc:HGNC:7133]
ENSG00000049239	-0.167456	6.58132	0.779627	0.948091	H6PD	1	9234774	9271337	1	hexose-6-phosphate dehydrogenase/glucose 1-dehydrogenase [Source:HGNC Symbol;Acc:HGNC:4795]
ENSG00000104853	-0.111306	7.90093	0.779225	0.948091	CLPTM1	19	44954585	44993341	1	CLPTM1 regulator of GABA type A receptor forward trafficking [Source:HGNC Symbol;Acc:HGNC:2087]
ENSG00000117298	-0.0987371	8.23827	0.781127	0.948091	ECE1	1	21217247	21345572	-1	endothelin converting enzyme 1 [Source:HGNC Symbol;Acc:HGNC:3146]
ENSG00000125398	0.100381	8.06021	0.780576	0.948091	SOX9	17	72121020	72126416	1	SRY-box transcription factor 9 [Source:HGNC Symbol;Acc:HGNC:11204]
ENSG00000136699	-0.102031	7.48879	0.780988	0.948091	SMPD4	2	130151392	130182750	-1	sphingomyelin phosphodiesterase 4 [Source:HGNC Symbol;Acc:HGNC:32949]
ENSG00000141934	-0.0980106	7.9022	0.780452	0.948091	PLPP2	19	281040	291403	-1	phospholipid phosphatase 2 [Source:HGNC Symbol;Acc:HGNC:9230]
ENSG00000151208	0.146148	6.8314	0.780167	0.948091	DLG5	10	77790791	77926755	-1	discs large MAGUK scaffold protein 5 [Source:HGNC Symbol;Acc:HGNC:2904]
ENSG00000052749	-0.0952043	7.68669	0.781848	0.948173	RRP12	10	97356358	97426076	-1	ribosomal RNA processing 12 homolog [Source:HGNC Symbol;Acc:HGNC:29100]
ENSG00000100239	-0.0844557	7.28903	0.784922	0.948173	PPP6R2	22	50343304	50445090	1	protein phosphatase 6 regulatory subunit 2 [Source:HGNC Symbol;Acc:HGNC:19253]
ENSG00000103249	-0.0926165	7.00035	0.785009	0.948173	CLCN7	16	1444934	1475084	-1	chloride voltage-gated channel 7 [Source:HGNC Symbol;Acc:HGNC:2025]
ENSG00000130723	-0.127155	8.20297	0.78523	0.948173	PRRC2B	9	131373636	131500197	1	proline rich coiled-coil 2B [Source:HGNC Symbol;Acc:HGNC:28121]
ENSG00000149782	-0.0855695	7.91298	0.783841	0.948173	PLCB3	11	64251530	64269150	1	phospholipase C beta 3 [Source:HGNC Symbol;Acc:HGNC:9056]
ENSG00000158106	-0.165233	7.44856	0.785351	0.948173	RHPN1	8	143368876	143384221	1	rhophilin Rho GTPase binding protein 1 [Source:HGNC Symbol;Acc:HGNC:19973]
[truncated: 420 more rows]

## Sheet: Wt_Combine_vs_APR
ensembl_gene_id	logFC	logCPM	PValue	FDR	external_gene_name	chromosome_name	start_position	end_position	strand	description
ENSG00000107984	1.74116	7.25596	5.80099e-07	0.000467753	DKK1	10	52314281	52318042	1	dickkopf WNT signaling pathway inhibitor 1 [Source:HGNC Symbol;Acc:HGNC:2891]
ENSG00000115129	2.33035	6.20896	5.16867e-07	0.000467753	TP53I3	2	24077433	24085861	-1	tumor protein p53 inducible protein 3 [Source:HGNC Symbol;Acc:HGNC:19373]
ENSG00000169035	1.76937	7.20164	3.02341e-07	0.000467753	KLK7	19	50976468	50984099	-1	kallikrein related peptidase 7 [Source:HGNC Symbol;Acc:HGNC:6368]
ENSG00000128510	3.06874	6.59502	3.01641e-06	0.00182418	CPA4	7	130293134	130324180	1	carboxypeptidase A4 [Source:HGNC Symbol;Acc:HGNC:15740]
ENSG00000124762	1.57802	10.7642	3.78564e-06	0.00183149	CDKN1A	6	36676460	36687337	1	cyclin dependent kinase inhibitor 1A [Source:HGNC Symbol;Acc:HGNC:1784]
ENSG00000187608	1.56994	8.01176	1.51411e-05	0.0061044	ISG15	1	1001138	1014540	1	ISG15 ubiquitin like modifier [Source:HGNC Symbol;Acc:HGNC:4053]
ENSG00000142910	1.32433	8.14835	2.19954e-05	0.00760097	TINAGL1	1	31576485	31587686	1	tubulointerstitial nephritis antigen like 1 [Source:HGNC Symbol;Acc:HGNC:19168]
ENSG00000185551	1.55001	7.46849	3.75095e-05	0.0113419	NR2F2	15	96325938	96340263	1	nuclear receptor subfamily 2 group F member 2 [Source:HGNC Symbol;Acc:HGNC:7976]
ENSG00000167755	1.75378	7.07433	4.40171e-05	0.0118308	KLK6	19	50958631	50969673	-1	kallikrein related peptidase 6 [Source:HGNC Symbol;Acc:HGNC:6367]
ENSG00000206075	2.16613	6.05911	7.6907e-05	0.0186038	SERPINB5	18	63476958	63505085	1	serpin family B member 5 [Source:HGNC Symbol;Acc:HGNC:8949]
ENSG00000092621	-2.11833	8.4087	9.21694e-05	0.0202689	PHGDH	1	119648411	119744218	1	phosphoglycerate dehydrogenase [Source:HGNC Symbol;Acc:HGNC:8923]
ENSG00000145632	2.0486	7.58371	0.000418609	0.0843845	PLK2	5	58453982	58460139	-1	polo like kinase 2 [Source:HGNC Symbol;Acc:HGNC:19699]
ENSG00000110092	1.49242	10.1336	0.000478622	0.0890604	CCND1	11	69641156	69654474	1	cyclin D1 [Source:HGNC Symbol;Acc:HGNC:1582]
ENSG00000100889	-2.71098	7.49933	0.000944824	0.142846	PCK2	14	24094053	24110598	1	phosphoenolpyruvate carboxykinase 2, mitochondrial [Source:HGNC Symbol;Acc:HGNC:8725]
ENSG00000101224	-1.13825	8.8324	0.000915718	0.142846	CDC25B	20	3786772	3806121	1	cell division cycle 25B [Source:HGNC Symbol;Acc:HGNC:1726]
ENSG00000167779	1.37774	7.58133	0.000878842	0.142846	IGFBP6	12	53097436	53102345	1	insulin like growth factor binding protein 6 [Source:HGNC Symbol;Acc:HGNC:5475]
ENSG00000099994	1.45932	8.01561	0.00134574	0.177529	SUSD2	22	24181487	24189106	1	sushi domain containing 2 [Source:HGNC Symbol;Acc:HGNC:30667]
ENSG00000114115	1.05048	7.13846	0.0013944	0.177529	RBP1	3	139517434	139539829	-1	retinol binding protein 1 [Source:HGNC Symbol;Acc:HGNC:9919]
ENSG00000184254	1.81713	7.43852	0.00131775	0.177529	ALDH1A3	15	100877714	100916626	1	aldehyde dehydrogenase 1 family member A3 [Source:HGNC Symbol;Acc:HGNC:409]
ENSG00000129451	1.44994	7.22798	0.00170306	0.205985	KLK10	19	51012739	51020175	-1	kallikrein related peptidase 10 [Source:HGNC Symbol;Acc:HGNC:6358]
ENSG00000185033	-1.12484	7.84133	0.00208376	0.240029	SEMA4B	15	90160604	90229679	1	semaphorin 4B [Source:HGNC Symbol;Acc:HGNC:10730]
ENSG00000087088	0.965244	7.26928	0.00247369	0.271994	BAX	19	48954815	48961798	1	BCL2 associated X, apoptosis regulator [Source:HGNC Symbol;Acc:HGNC:959]
ENSG00000103044	1.10164	6.99617	0.00277254	0.282236	HAS3	16	69105653	69118719	1	hyaluronan synthase 3 [Source:HGNC Symbol;Acc:HGNC:4820]
ENSG00000106948	-1.95141	6.28534	0.00280019	0.282236	AKNA	9	114334156	114394405	-1	AT-hook transcription factor [Source:HGNC Symbol;Acc:HGNC:24108]
ENSG00000163132	0.908108	8.39676	0.00305581	0.29568	MSX1	4	4859665	4863936	1	msh homeobox 1 [Source:HGNC Symbol;Acc:HGNC:7391]
ENSG00000090776	1.05253	6.66887	0.00371749	0.315676	EFNB1	X	68829021	68842160	1	ephrin B1 [Source:HGNC Symbol;Acc:HGNC:3226]
ENSG00000110628	-1.43147	7.06328	0.00381557	0.315676	SLC22A18	11	2899721	2925246	1	solute carrier family 22 member 18 [Source:HGNC Symbol;Acc:HGNC:10964]
ENSG00000172927	0.897259	7.60916	0.00378448	0.315676	MYEOV	11	69294151	69367726	1	myeloma overexpressed [Source:HGNC Symbol;Acc:HGNC:7563]
ENSG00000177106	0.899352	8.79622	0.00374255	0.315676	EPS8L2	11	694438	727727	1	EPS8 like 2 [Source:HGNC Symbol;Acc:HGNC:21296]
ENSG00000177595	1.17249	6.76294	0.00391496	0.315676	PIDD1	11	799179	809753	-1	p53-induced death domain protein 1 [Source:HGNC Symbol;Acc:HGNC:16491]
ENSG00000090861	-1.81696	9.72544	0.00434932	0.339388	AARS1	16	70251983	70289707	-1	alanyl-tRNA synthetase 1 [Source:HGNC Symbol;Acc:HGNC:20]
ENSG00000115641	1.00648	7.6225	0.00585027	0.442244	FHL2	2	105357712	105438513	-1	four and a half LIM domains 2 [Source:HGNC Symbol;Acc:HGNC:3703]
ENSG00000175793	1.43757	10.4198	0.00615205	0.450964	SFN	1	26863149	26864456	1	stratifin [Source:HGNC Symbol;Acc:HGNC:10773]
ENSG00000076604	0.89773	7.96461	0.00716805	0.481653	TRAF4	17	28744005	28750956	1	TNF receptor associated factor 4 [Source:HGNC Symbol;Acc:HGNC:12034]
ENSG00000104419	-0.968902	9.26206	0.00696045	0.481653	NDRG1	8	133237175	133302022	-1	N-myc downstream regulated 1 [Source:HGNC Symbol;Acc:HGNC:7679]
ENSG00000125826	-2.36134	9.68724	0.00709034	0.481653	RBCK1	20	407498	432139	1	RANBP2-type and C3HC4-type zinc finger containing 1 [Source:HGNC Symbol;Acc:HGNC:15864]
ENSG00000182718	0.845483	10.7666	0.00795355	0.51999	ANXA2	15	60347134	60402883	-1	annexin A2 [Source:HGNC Symbol;Acc:HGNC:537]
ENSG00000101255	-2.24619	8.36914	0.00832069	0.529678	TRIB3	20	362835	397559	1	tribbles pseudokinase 3 [Source:HGNC Symbol;Acc:HGNC:16228]
ENSG00000100097	-0.998473	9.66171	0.00915375	0.567767	LGALS1	22	37675636	37679802	1	galectin 1 [Source:HGNC Symbol;Acc:HGNC:6561]
ENSG00000105048	-0.893789	7.6352	0.0105534	0.638215	TNNT1	19	55132698	55149206	-1	troponin T1, slow skeletal type [Source:HGNC Symbol;Acc:HGNC:11948]
ENSG00000105516	-1.51582	6.92256	0.0111249	0.640742	DBP	19	48630030	48637379	-1	D-box binding PAR bZIP transcription factor [Source:HGNC Symbol;Acc:HGNC:2697]
ENSG00000174307	1.04713	7.30845	0.0110059	0.640742	PHLDA3	1	201464278	201469237	-1	pleckstrin homology like domain family A member 3 [Source:HGNC Symbol;Acc:HGNC:8934]
ENSG00000211459	0.882207	11.0127	0.0117781	0.662588	MT-RNR1	MT	648	1601	1	mitochondrially encoded 12S rRNA [Source:HGNC Symbol;Acc:HGNC:7470]
ENSG00000136378	0.82464	7.08683	0.0121299	0.666867	ADAMTS7	15	78759206	78811464	-1	ADAM metallopeptidase with thrombospondin type 1 motif 7 [Source:HGNC Symbol;Acc:HGNC:223]
ENSG00000055163	0.806992	7.41981	0.0127045	0.673034	CYFIP2	5	157266079	157395595	1	cytoplasmic FMR1 interacting protein 2 [Source:HGNC Symbol;Acc:HGNC:13760]
ENSG00000183696	-2.67383	7.65545	0.0127985	0.673034	UPP1	7	48088628	48108736	1	uridine phosphorylase 1 [Source:HGNC Symbol;Acc:HGNC:12576]
ENSG00000168209	-1.82805	7.98368	0.0139623	0.703642	DDIT4	10	72273924	72276036	1	DNA damage inducible transcript 4 [Source:HGNC Symbol;Acc:HGNC:24944]
ENSG00000184897	-1.35375	7.55244	0.013955	0.703642	H1-10	3	129314771	129316286	-1	H1.10 linker histone [Source:HGNC Symbol;Acc:HGNC:4722]
ENSG00000124191	-1.03764	6.83653	0.0149496	0.738023	TOX2	20	43914852	44069616	1	TOX high mobility group box family member 2 [Source:HGNC Symbol;Acc:HGNC:16095]
ENSG00000135679	1.88048	6.66167	0.0157146	0.760271	MDM2	12	68808177	68850686	1	MDM2 proto-oncogene [Source:HGNC Symbol;Acc:HGNC:6973]
ENSG00000136068	-1.23985	9.28262	0.0167663	0.795248	FLNB	3	58008400	58172251	1	filamin B [Source:HGNC Symbol;Acc:HGNC:3755]
ENSG00000102007	-0.940985	7.56393	0.0192132	0.815516	PLP2	X	49171898	49175235	1	proteolipid protein 2 [Source:HGNC Symbol;Acc:HGNC:9087]
ENSG00000108840	-0.902316	7.06257	0.0187557	0.815516	HDAC5	17	44076746	44123702	-1	histone deacetylase 5 [Source:HGNC Symbol;Acc:HGNC:14068]
ENSG00000115756	-1.02294	8.85588	0.018952	0.815516	HPCAL1	2	10302889	10427617	1	hippocalcin like 1 [Source:HGNC Symbol;Acc:HGNC:5145]
ENSG00000137312	-0.807009	7.52023	0.0195535	0.815516	FLOT1	6	30727709	30742732	-1	flotillin 1 [Source:HGNC Symbol;Acc:HGNC:3757]
ENSG00000164237	0.93903	6.90955	0.0177302	0.815516	CMBL	5	10275875	10307902	-1	carboxymethylenebutenolidase homolog [Source:HGNC Symbol;Acc:HGNC:25090]
ENSG00000165655	1.12353	7.47906	0.0194479	0.815516	ZNF503	10	75397830	75401764	-1	zinc finger protein 503 [Source:HGNC Symbol;Acc:HGNC:23589]
ENSG00000181026	0.747882	6.95623	0.0180713	0.815516	AEN	15	88621337	88632281	1	apoptosis enhancing nuclease [Source:HGNC Symbol;Acc:HGNC:25722]
ENSG00000184916	0.736153	8.35833	0.0202621	0.830748	JAG2	14	105140982	105168824	-1	jagged canonical Notch ligand 2 [Source:HGNC Symbol;Acc:HGNC:6189]
ENSG00000125398	0.838457	8.06021	0.0207984	0.838522	SOX9	17	72121020	72126416	1	SRY-box transcription factor 9 [Source:HGNC Symbol;Acc:HGNC:11204]
ENSG00000115738	1.16	6.52044	0.0217362	0.861967	ID2	2	8678845	8684461	1	inhibitor of DNA binding 2 [Source:HGNC Symbol;Acc:HGNC:5361]
ENSG00000105974	1.01154	7.73456	0.0227558	0.873751	CAV1	7	116524994	116561179	1	caveolin 1 [Source:HGNC Symbol;Acc:HGNC:1527]
ENSG00000144579	-0.816445	6.70313	0.0226338	0.873751	CTDSP1	2	218398256	218405941	1	CTD small phosphatase 1 [Source:HGNC Symbol;Acc:HGNC:21614]
ENSG00000161638	-0.774209	7.09687	0.0243961	0.891096	ITGA5	12	54395261	54419266	-1	integrin subunit alpha 5 [Source:HGNC Symbol;Acc:HGNC:6141]
ENSG00000168528	0.891767	8.60502	0.0250348	0.891096	SERINC2	1	31409565	31434680	1	serine incorporator 2 [Source:HGNC Symbol;Acc:HGNC:23231]
ENSG00000189060	-1.32369	10.1168	0.0250494	0.891096	H1-0	22	37805093	37807436	1	H1.0 linker histone [Source:HGNC Symbol;Acc:HGNC:4714]
ENSG00000196365	-0.961025	9.45618	0.023769	0.891096	LONP1	19	5691834	5720572	-1	lon peptidase 1, mitochondrial [Source:HGNC Symbol;Acc:HGNC:9479]
ENSG00000197958	-0.737376	10.8094	0.0239655	0.891096	RPL12	9	127447674	127451406	-1	ribosomal protein L12 [Source:HGNC Symbol;Acc:HGNC:10302]
ENSG00000119383	-0.702643	8.24617	0.0268171	0.895843	PTPA	9	129110950	129148946	1	protein phosphatase 2 phosphatase activator [Source:HGNC Symbol;Acc:HGNC:9308]
ENSG00000120053	-1.11377	7.81506	0.0267348	0.895843	GOT1	10	99396870	99430624	-1	glutamic-oxaloacetic transaminase 1 [Source:HGNC Symbol;Acc:HGNC:4432]
ENSG00000171219	0.804736	6.97704	0.0268795	0.895843	CDC42BPG	11	64823052	64844653	-1	CDC42 binding protein kinase gamma [Source:HGNC Symbol;Acc:HGNC:29829]
ENSG00000181610	0.755046	6.9337	0.0270345	0.895843	MRPS23	17	57834781	57850056	-1	mitochondrial ribosomal protein S23 [Source:HGNC Symbol;Acc:HGNC:14509]
ENSG00000244509	1.014	6.81923	0.0263469	0.895843	APOBEC3C	22	39014257	39020352	1	apolipoprotein B mRNA editing enzyme catalytic subunit 3C [Source:HGNC Symbol;Acc:HGNC:17353]
ENSG00000198763	0.856392	12.0066	0.0287387	0.939444	MT-ND2	MT	4470	5511	1	mitochondrially encoded NADH:ubiquinone oxidoreductase core subunit 2 [Source:HGNC Symbol;Acc:HGNC:7456]
ENSG00000072310	-0.862975	10.0224	0.030064	0.969664	SREBF1	17	17810399	17837011	-1	sterol regulatory element binding transcription factor 1 [Source:HGNC Symbol;Acc:HGNC:11289]
ENSG00000083444	-0.72128	8.90629	0.0310097	0.974999	PLOD1	1	11934205	11975538	1	procollagen-lysine,2-oxoglutarate 5-dioxygenase 1 [Source:HGNC Symbol;Acc:HGNC:9081]
ENSG00000128564	-1.56558	9.10626	0.0310355	0.974999	VGF	7	101162509	101165569	-1	VGF nerve growth factor inducible [Source:HGNC Symbol;Acc:HGNC:12684]
ENSG00000114019	0.728717	6.99424	0.0316319	0.980996	AMOTL2	3	134355347	134375479	-1	angiomotin like 2 [Source:HGNC Symbol;Acc:HGNC:17812]
ENSG00000020129	0.843485	6.925	0.0326484	0.987205	NCDN	1	35557473	35567274	1	neurochondrin [Source:HGNC Symbol;Acc:HGNC:17597]
ENSG00000107902	-0.882246	6.76858	0.0325324	0.987205	LHPP	10	124461823	124617888	1	phospholysine phosphohistidine inorganic pyrophosphate phosphatase [Source:HGNC Symbol;Acc:HGNC:30042]
ENSG00000010292	-0.782524	7.78827	0.0394438	0.991716	NCAPD2	12	6493356	6531955	1	non-SMC condensin I complex subunit D2 [Source:HGNC Symbol;Acc:HGNC:24305]
ENSG00000065154	1.24886	6.73755	0.0332797	0.991716	OAT	10	124397303	124418976	-1	ornithine aminotransferase [Source:HGNC Symbol;Acc:HGNC:8091]
ENSG00000067182	-0.824338	7.33401	0.0358004	0.991716	TNFRSF1A	12	6328757	6342114	-1	TNF receptor superfamily member 1A [Source:HGNC Symbol;Acc:HGNC:11916]
ENSG00000086061	1.17598	7.1761	0.0436282	0.991716	DNAJA1	9	33025273	33039907	1	DnaJ heat shock protein family (Hsp40) member A1 [Source:HGNC Symbol;Acc:HGNC:5229]
ENSG00000089248	-0.671193	7.10664	0.0441799	0.991716	ERP29	12	112013348	112023449	1	endoplasmic reticulum protein 29 [Source:HGNC Symbol;Acc:HGNC:13799]
ENSG00000100994	-1.11094	9.25622	0.0454995	0.991716	PYGB	20	25248085	25298012	1	glycogen phosphorylase B [Source:HGNC Symbol;Acc:HGNC:9723]
ENSG00000102572	-0.736973	7.16127	0.0463265	0.991716	STK24	13	98445185	98577940	-1	serine/threonine kinase 24 [Source:HGNC Symbol;Acc:HGNC:11403]
ENSG00000103257	-1.26773	11.5377	0.0458098	0.991716	SLC7A5	16	87830023	87869507	-1	solute carrier family 7 member 5 [Source:HGNC Symbol;Acc:HGNC:11063]
ENSG00000109971	0.994066	10.0302	0.0425986	0.991716	HSPA8	11	123057489	123063230	-1	heat shock protein family A (Hsp70) member 8 [Source:HGNC Symbol;Acc:HGNC:5241]
ENSG00000112378	0.789246	7.68325	0.0457197	0.991716	PERP	6	138088505	138107419	-1	p53 apoptosis effector related to PMP22 [Source:HGNC Symbol;Acc:HGNC:17637]
ENSG00000115415	1.22317	6.91126	0.0395318	0.991716	STAT1	2	190908460	191020960	-1	signal transducer and activator of transcription 1 [Source:HGNC Symbol;Acc:HGNC:11362]
ENSG00000116584	-1.38176	7.46515	0.0377188	0.991716	ARHGEF2	1	155946851	156007070	-1	Rho/Rac guanine nucleotide exchange factor 2 [Source:HGNC Symbol;Acc:HGNC:682]
ENSG00000125148	-0.693421	8.7704	0.0364957	0.991716	MT2A	16	56608584	56609497	1	metallothionein 2A [Source:HGNC Symbol;Acc:HGNC:7406]
ENSG00000128965	-2.17921	6.7194	0.0366915	0.991716	CHAC1	15	40952962	40956512	1	ChaC glutathione specific gamma-glutamylcyclotransferase 1 [Source:HGNC Symbol;Acc:HGNC:28680]
ENSG00000131620	0.888861	6.82028	0.046227	0.991716	ANO1	11	70078302	70189528	1	anoctamin 1 [Source:HGNC Symbol;Acc:HGNC:21625]
ENSG00000133318	-0.80375	7.34535	0.0394939	0.991716	RTN3	11	63681446	63759891	1	reticulon 3 [Source:HGNC Symbol;Acc:HGNC:10469]
ENSG00000134684	-1.04211	8.49731	0.034	0.991716	YARS1	1	32775237	32818153	-1	tyrosyl-tRNA synthetase 1 [Source:HGNC Symbol;Acc:HGNC:12840]
ENSG00000137309	-0.886508	12.9338	0.0404015	0.991716	HMGA1	6	34236873	34246231	1	high mobility group AT-hook 1 [Source:HGNC Symbol;Acc:HGNC:5010]
ENSG00000141682	1.35393	6.67061	0.0426588	0.991716	PMAIP1	18	59899996	59904305	1	phorbol-12-myristate-13-acetate-induced protein 1 [Source:HGNC Symbol;Acc:HGNC:9108]
ENSG00000142784	-0.720382	6.86744	0.0442496	0.991716	WDTC1	1	27234632	27308636	1	WD and tetratricopeptide repeats 1 [Source:HGNC Symbol;Acc:HGNC:29175]
ENSG00000158195	-0.74301	7.57602	0.0446782	0.991716	WASF2	1	27404230	27490167	-1	WASP family member 2 [Source:HGNC Symbol;Acc:HGNC:12733]
ENSG00000161513	0.854347	9.06079	0.0346294	0.991716	FDXR	17	74862497	74873031	-1	ferredoxin reductase [Source:HGNC Symbol;Acc:HGNC:3642]
ENSG00000167861	-0.778776	7.63945	0.0418092	0.991716	HID1	17	74950742	74973166	-1	HID1 domain containing [Source:HGNC Symbol;Acc:HGNC:15736]
ENSG00000168394	0.648605	6.95705	0.0433898	0.991716	TAP1	6	32845209	32853978	-1	transporter 1, ATP binding cassette subfamily B member [Source:HGNC Symbol;Acc:HGNC:43]
ENSG00000169188	0.757772	6.69939	0.0353388	0.991716	APEX2	X	55000363	55009057	1	apurinic/apyrimidinic endodeoxyribonuclease 2 [Source:HGNC Symbol;Acc:HGNC:17889]
ENSG00000175215	-0.86315	6.96287	0.0403321	0.991716	CTDSP2	12	57819927	57846729	-1	CTD small phosphatase 2 [Source:HGNC Symbol;Acc:HGNC:17077]
ENSG00000175745	-1.1101	6.74527	0.0403538	0.991716	NR2F1	5	93583222	93594611	1	nuclear receptor subfamily 2 group F member 1 [Source:HGNC Symbol;Acc:HGNC:7975]
ENSG00000177542	0.703595	7.70452	0.0440915	0.991716	SLC25A22	11	790475	798281	-1	solute carrier family 25 member 22 [Source:HGNC Symbol;Acc:HGNC:19954]
ENSG00000185088	1.35517	6.34833	0.040375	0.991716	RPS27L	15	63125872	63158021	-1	ribosomal protein S27 like [Source:HGNC Symbol;Acc:HGNC:18476]
ENSG00000185624	-0.626722	10.7596	0.0428911	0.991716	P4HB	17	81843161	81860624	-1	prolyl 4-hydroxylase subunit beta [Source:HGNC Symbol;Acc:HGNC:8548]
ENSG00000198727	0.770398	12.9021	0.0388584	0.991716	MT-CYB	MT	14747	15887	1	mitochondrially encoded cytochrome b [Source:HGNC Symbol;Acc:HGNC:7427]
ENSG00000198888	0.809898	12.229	0.0405967	0.991716	MT-ND1	MT	3307	4262	1	mitochondrially encoded NADH:ubiquinone oxidoreductase core subunit 1 [Source:HGNC Symbol;Acc:HGNC:7455]
ENSG00000228253	0.81937	8.68857	0.0454823	0.991716	MT-ATP8	MT	8366	8572	1	mitochondrially encoded ATP synthase membrane subunit 8 [Source:HGNC Symbol;Acc:HGNC:7415]
ENSG00000002549	0.816753	6.68133	0.100743	0.998855	LAP3	4	17577192	17607972	1	leucine aminopeptidase 3 [Source:HGNC Symbol;Acc:HGNC:18449]
ENSG00000002586	-0.588798	6.71816	0.162789	0.998855	CD99	X	2691187	2741309	1	CD99 molecule (Xg blood group) [Source:HGNC Symbol;Acc:HGNC:7082]
ENSG00000002587	-0.420898	8.96705	0.31021	0.998855	HS3ST1	4	11393150	11429564	-1	heparan sulfate-glucosamine 3-sulfotransferase 1 [Source:HGNC Symbol;Acc:HGNC:5194]
ENSG00000002834	-0.240234	8.7652	0.423529	0.998855	LASP1	17	38869859	38921770	1	LIM and SH3 protein 1 [Source:HGNC Symbol;Acc:HGNC:6513]
ENSG00000003249	0.0814249	7.90286	0.851515	0.998855	DBNDD1	16	90004871	90019890	-1	dysbindin domain containing 1 [Source:HGNC Symbol;Acc:HGNC:28455]
ENSG00000004059	-0.239292	8.30436	0.591471	0.998855	ARF5	7	127588386	127591700	1	ADP ribosylation factor 5 [Source:HGNC Symbol;Acc:HGNC:658]
ENSG00000004142	0.222668	7.49829	0.470555	0.998855	POLDIP2	17	28346633	28357527	-1	DNA polymerase delta interacting protein 2 [Source:HGNC Symbol;Acc:HGNC:23781]
ENSG00000004399	-0.425819	7.37715	0.236634	0.998855	PLXND1	3	129555214	129606676	-1	plexin D1 [Source:HGNC Symbol;Acc:HGNC:9107]
ENSG00000004455	-0.251843	8.01885	0.493975	0.998855	AK2	1	33007940	33080996	-1	adenylate kinase 2 [Source:HGNC Symbol;Acc:HGNC:362]
ENSG00000004478	0.0659756	8.21869	0.873121	0.998855	FKBP4	12	2794970	2805423	1	FKBP prolyl isomerase 4 [Source:HGNC Symbol;Acc:HGNC:3720]
ENSG00000004487	0.0828861	7.73372	0.817232	0.998855	KDM1A	1	23019443	23083689	1	lysine demethylase 1A [Source:HGNC Symbol;Acc:HGNC:29079]
ENSG00000004975	-0.295455	6.96777	0.37406	0.998855	DVL2	17	7225342	7234517	-1	dishevelled segment polarity protein 2 [Source:HGNC Symbol;Acc:HGNC:3086]
ENSG00000005007	-0.0382504	8.12288	0.898617	0.998855	UPF1	19	18831959	18868230	1	UPF1 RNA helicase and ATPase [Source:HGNC Symbol;Acc:HGNC:9962]
ENSG00000005022	0.0357818	8.81111	0.928469	0.998855	SLC25A5	X	119468422	119471396	1	solute carrier family 25 member 5 [Source:HGNC Symbol;Acc:HGNC:10991]
ENSG00000005206	0.289853	6.82982	0.552148	0.998855	SPPL2B	19	2328615	2355095	1	signal peptide peptidase like 2B [Source:HGNC Symbol;Acc:HGNC:30627]
ENSG00000005339	-0.0752773	6.98263	0.880541	0.998855	CREBBP	16	3725054	3880713	-1	CREB binding protein [Source:HGNC Symbol;Acc:HGNC:2348]
ENSG00000005486	-0.232166	7.24829	0.547544	0.998855	RHBDD2	7	75842602	75888926	1	rhomboid domain containing 2 [Source:HGNC Symbol;Acc:HGNC:23082]
ENSG00000005884	-0.979747	11.1656	0.0725901	0.998855	ITGA3	17	50055968	50090481	1	integrin subunit alpha 3 [Source:HGNC Symbol;Acc:HGNC:6139]
ENSG00000006016	-0.325541	7.19027	0.583713	0.998855	CRLF1	19	18572220	18607741	-1	cytokine receptor like factor 1 [Source:HGNC Symbol;Acc:HGNC:2364]
ENSG00000006118	0.0397307	9.5287	0.931429	0.998855	TMEM132A	11	60924460	60937159	1	transmembrane protein 132A [Source:HGNC Symbol;Acc:HGNC:31092]
ENSG00000006125	0.188306	8.41152	0.560967	0.998855	AP2B1	17	35578046	35726413	1	adaptor related protein complex 2 subunit beta 1 [Source:HGNC Symbol;Acc:HGNC:563]
ENSG00000006282	-0.0790045	7.06252	0.823762	0.998855	SPATA20	17	50543058	50555852	1	spermatogenesis associated 20 [Source:HGNC Symbol;Acc:HGNC:26125]
ENSG00000006327	-0.25405	8.69034	0.602023	0.998855	TNFRSF12A	16	3018445	3022383	1	TNF receptor superfamily member 12A [Source:HGNC Symbol;Acc:HGNC:18152]
ENSG00000006453	-0.212515	6.63165	0.68266	0.998855	BAIAP2L1	7	98291650	98401090	-1	BAR/IMD domain containing adaptor protein 2 like 1 [Source:HGNC Symbol;Acc:HGNC:21649]
ENSG00000006534	-0.440289	7.04939	0.217091	0.998855	ALDH3B1	11	68008578	68029282	1	aldehyde dehydrogenase 3 family member B1 [Source:HGNC Symbol;Acc:HGNC:410]
ENSG00000006744	0.315683	7.7573	0.323304	0.998855	ELAC2	17	12991612	13018065	-1	elaC ribonuclease Z 2 [Source:HGNC Symbol;Acc:HGNC:14198]
ENSG00000007047	-0.171967	7.15703	0.590644	0.998855	MARK4	19	45079288	45305284	1	microtubule affinity regulating kinase 4 [Source:HGNC Symbol;Acc:HGNC:13538]
ENSG00000007080	-0.0372039	8.59876	0.926199	0.998855	CCDC124	19	17933015	17943991	1	coiled-coil domain containing 124 [Source:HGNC Symbol;Acc:HGNC:25171]
ENSG00000007202	0.0745178	7.03802	0.848216	0.998855	KIAA0100	17	28614446	28645454	-1	KIAA0100 [Source:HGNC Symbol;Acc:HGNC:28960]
ENSG00000007376	0.460842	8.00034	0.373193	0.998855	RPUSD1	16	784974	788397	-1	RNA pseudouridine synthase domain containing 1 [Source:HGNC Symbol;Acc:HGNC:14173]
ENSG00000007520	0.342716	7.14558	0.479407	0.998855	TSR3	16	1349240	1351878	-1	TSR3 ribosome maturation factor [Source:HGNC Symbol;Acc:HGNC:14175]
ENSG00000008018	0.261231	7.54612	0.465458	0.998855	PSMB1	6	170535120	170553307	-1	proteasome 20S subunit beta 1 [Source:HGNC Symbol;Acc:HGNC:9537]
ENSG00000008130	-0.0841062	7.13688	0.791027	0.998855	NADK	1	1751232	1780457	-1	NAD kinase [Source:HGNC Symbol;Acc:HGNC:29831]
ENSG00000008283	-0.278147	7.19181	0.409081	0.998855	CYB561	17	63432304	63446354	-1	cytochrome b561 [Source:HGNC Symbol;Acc:HGNC:2571]
ENSG00000008710	-0.567646	7.59775	0.323795	0.998855	PKD1	16	2088708	2135898	-1	polycystin 1, transient receptor potential channel interacting [Source:HGNC Symbol;Acc:HGNC:9008]
ENSG00000008838	0.00140231	7.51177	0.996844	0.998855	MED24	17	40019097	40061215	-1	mediator complex subunit 24 [Source:HGNC Symbol;Acc:HGNC:22963]
ENSG00000008988	-0.266205	10.0824	0.411563	0.998855	RPS20	8	56067254	56074510	-1	ribosomal protein S20 [Source:HGNC Symbol;Acc:HGNC:10405]
ENSG00000009307	0.0677161	8.86262	0.907625	0.998855	CSDE1	1	114716913	114758676	-1	cold shock domain containing E1 [Source:HGNC Symbol;Acc:HGNC:29905]
ENSG00000009335	0.35524	7.21375	0.545601	0.998855	UBE3C	7	157138916	157269370	1	ubiquitin protein ligase E3C [Source:HGNC Symbol;Acc:HGNC:16803]
ENSG00000009950	-0.160151	6.72088	0.787955	0.998855	MLXIPL	7	73593194	73624543	-1	MLX interacting protein like [Source:HGNC Symbol;Acc:HGNC:12744]
ENSG00000009954	-0.0501286	6.81752	0.941801	0.998855	BAZ1B	7	73440406	73522293	-1	bromodomain adjacent to zinc finger domain 1B [Source:HGNC Symbol;Acc:HGNC:961]
ENSG00000010256	-0.57576	8.81893	0.15883	0.998855	UQCRC1	3	48599002	48610976	-1	ubiquinol-cytochrome c reductase core protein 1 [Source:HGNC Symbol;Acc:HGNC:12585]
ENSG00000010278	0.139135	7.73055	0.70365	0.998855	CD9	12	6199715	6238271	1	CD9 molecule [Source:HGNC Symbol;Acc:HGNC:1709]
ENSG00000010322	-0.102023	7.31213	0.773531	0.998855	NISCH	3	52455118	52493068	1	nischarin [Source:HGNC Symbol;Acc:HGNC:18006]
ENSG00000011009	0.564406	7.84395	0.119659	0.998855	LYPLA2	1	23791145	23795539	1	lysophospholipase 2 [Source:HGNC Symbol;Acc:HGNC:6738]
ENSG00000011295	0.0579828	6.72679	0.934028	0.998855	TTC19	17	15999784	16045015	1	tetratricopeptide repeat domain 19 [Source:HGNC Symbol;Acc:HGNC:26006]
ENSG00000011304	-0.396643	10.061	0.27828	0.998855	PTBP1	19	797075	812327	1	polypyrimidine tract binding protein 1 [Source:HGNC Symbol;Acc:HGNC:9583]
ENSG00000011347	-0.46449	7.02732	0.170846	0.998855	SYT7	11	61513714	61581148	-1	synaptotagmin 7 [Source:HGNC Symbol;Acc:HGNC:11514]
ENSG00000011422	-0.387179	7.0279	0.386046	0.998855	PLAUR	19	43646095	43670547	-1	plasminogen activator, urokinase receptor [Source:HGNC Symbol;Acc:HGNC:9053]
ENSG00000011451	0.215679	7.05677	0.555987	0.998855	WIZ	19	15419978	15449956	-1	WIZ zinc finger [Source:HGNC Symbol;Acc:HGNC:30917]
ENSG00000011485	-0.123773	7.18023	0.711421	0.998855	PPP5C	19	46347087	46392981	1	protein phosphatase 5 catalytic subunit [Source:HGNC Symbol;Acc:HGNC:9322]
ENSG00000012061	-0.0739188	7.27013	0.840916	0.998855	ERCC1	19	45407334	45478828	-1	ERCC excision repair 1, endonuclease non-catalytic subunit [Source:HGNC Symbol;Acc:HGNC:3433]
ENSG00000012171	0.487707	7.27108	0.471565	0.998855	SEMA3B	3	50267558	50277546	1	semaphorin 3B [Source:HGNC Symbol;Acc:HGNC:10724]
ENSG00000012232	-0.069587	7.60921	0.846788	0.998855	EXTL3	8	28600469	28755599	1	exostosin like glycosyltransferase 3 [Source:HGNC Symbol;Acc:HGNC:3518]
ENSG00000013275	0.476483	7.87054	0.175371	0.998855	PSMC4	19	39971165	39981764	1	proteasome 26S subunit, ATPase 4 [Source:HGNC Symbol;Acc:HGNC:9551]
ENSG00000013306	-0.0526968	9.53591	0.882888	0.998855	SLC25A39	17	44319625	44324870	-1	solute carrier family 25 member 39 [Source:HGNC Symbol;Acc:HGNC:24279]
ENSG00000013364	0.389738	8.45467	0.304425	0.998855	MVP	16	29820394	29848039	1	major vault protein [Source:HGNC Symbol;Acc:HGNC:7531]
ENSG00000013588	0.741005	9.25486	0.106997	0.998855	GPRC5A	12	12891559	12917937	1	G protein-coupled receptor class C group 5 member A [Source:HGNC Symbol;Acc:HGNC:9836]
ENSG00000014164	-0.295357	6.97739	0.412174	0.998855	ZC3H3	8	143437659	143541447	-1	zinc finger CCCH-type containing 3 [Source:HGNC Symbol;Acc:HGNC:28972]
ENSG00000014216	0.435398	9.89219	0.3519	0.998855	CAPN1	11	65180566	65212006	1	calpain 1 [Source:HGNC Symbol;Acc:HGNC:1476]
ENSG00000014641	0.650886	6.59655	0.191471	0.998855	MDH1	2	63588609	63607197	1	malate dehydrogenase 1 [Source:HGNC Symbol;Acc:HGNC:6970]
ENSG00000017797	0.437744	7.03579	0.408194	0.998855	RALBP1	18	9475009	9538114	1	ralA binding protein 1 [Source:HGNC Symbol;Acc:HGNC:9841]
ENSG00000019186	0.559562	7.82107	0.256479	0.998855	CYP24A1	20	54153446	54173986	-1	cytochrome P450 family 24 subfamily A member 1 [Source:HGNC Symbol;Acc:HGNC:2602]
ENSG00000020633	-0.147773	6.81464	0.670871	0.998855	RUNX3	1	24899511	24965121	-1	RUNX family transcription factor 3 [Source:HGNC Symbol;Acc:HGNC:10473]
ENSG00000021300	0.414774	7.03127	0.289282	0.998855	PLEKHB1	11	73646178	73662819	1	pleckstrin homology domain containing B1 [Source:HGNC Symbol;Acc:HGNC:19079]
ENSG00000021355	-0.483668	6.71297	0.299323	0.998855	SERPINB1	6	2832332	2841959	-1	serpin family B member 1 [Source:HGNC Symbol;Acc:HGNC:3311]
ENSG00000021762	0.125807	7.15728	0.688556	0.998855	OSBPL5	11	3087107	3166739	-1	oxysterol binding protein like 5 [Source:HGNC Symbol;Acc:HGNC:16392]
ENSG00000022840	-0.180307	7.21521	0.550845	0.998855	RNF10	12	120533480	120577588	1	ring finger protein 10 [Source:HGNC Symbol;Acc:HGNC:10055]
ENSG00000023191	-0.224	8.59019	0.601507	0.998855	RNH1	11	494512	507300	-1	ribonuclease/angiogenin inhibitor 1 [Source:HGNC Symbol;Acc:HGNC:10074]
ENSG00000023330	-0.264454	7.18896	0.451255	0.998855	ALAS1	3	52198086	52214327	1	5'-aminolevulinate synthase 1 [Source:HGNC Symbol;Acc:HGNC:396]
ENSG00000023734	0.402751	7.43751	0.430731	0.998855	STRAP	12	15882387	15903478	1	serine/threonine kinase receptor associated protein [Source:HGNC Symbol;Acc:HGNC:30796]
ENSG00000024422	-0.439155	8.52244	0.244348	0.998855	EHD2	19	47713422	47743134	1	EH domain containing 2 [Source:HGNC Symbol;Acc:HGNC:3243]
ENSG00000025708	-0.239139	7.0469	0.594111	0.998855	TYMP	22	50525752	50530032	-1	thymidine phosphorylase [Source:HGNC Symbol;Acc:HGNC:3148]
ENSG00000025770	-0.665193	6.79664	0.173232	0.998855	NCAPH2	22	50508224	50524780	1	non-SMC condensin II complex subunit H2 [Source:HGNC Symbol;Acc:HGNC:25071]
ENSG00000026508	0.118204	9.05781	0.801077	0.998855	CD44	11	35138882	35232402	1	CD44 molecule (Indian blood group) [Source:HGNC Symbol;Acc:HGNC:1681]
ENSG00000026559	-1.06333	7.38883	0.0611601	0.998855	KCNG1	20	51003656	51023107	-1	potassium voltage-gated channel modifier subfamily G member 1 [Source:HGNC Symbol;Acc:HGNC:6248]
ENSG00000030582	-0.025723	9.38715	0.946283	0.998855	GRN	17	44345246	44353106	1	granulin precursor [Source:HGNC Symbol;Acc:HGNC:4601]
ENSG00000031698	-0.587312	8.4376	0.242183	0.998855	SARS1	1	109213918	109238182	1	seryl-tRNA synthetase 1 [Source:HGNC Symbol;Acc:HGNC:10537]
ENSG00000032444	-0.283371	8.44723	0.510954	0.998855	PNPLA6	19	7534004	7561764	1	patatin like phospholipase domain containing 6 [Source:HGNC Symbol;Acc:HGNC:16268]
ENSG00000034152	0.391715	7.69262	0.251536	0.998855	MAP2K3	17	21284672	21315232	1	mitogen-activated protein kinase kinase 3 [Source:HGNC Symbol;Acc:HGNC:6843]
ENSG00000034510	-0.622287	10.6579	0.0722894	0.998855	TMSB10	2	84905656	84906671	1	thymosin beta 10 [Source:HGNC Symbol;Acc:HGNC:11879]
ENSG00000035403	0.019738	7.41385	0.969582	0.998855	VCL	10	73995193	74121363	1	vinculin [Source:HGNC Symbol;Acc:HGNC:12665]
ENSG00000035862	0.0420728	7.0465	0.907177	0.998855	TIMP2	17	78852977	78925387	-1	TIMP metallopeptidase inhibitor 2 [Source:HGNC Symbol;Acc:HGNC:11821]
ENSG00000037474	0.470272	7.07173	0.406159	0.998855	NSUN2	5	6599239	6633291	-1	NOP2/Sun RNA methyltransferase 2 [Source:HGNC Symbol;Acc:HGNC:25994]
ENSG00000038358	-0.155839	6.98152	0.626438	0.998855	EDC4	16	67873052	67884499	1	enhancer of mRNA decapping 4 [Source:HGNC Symbol;Acc:HGNC:17157]
ENSG00000039068	-0.207926	6.85447	0.758873	0.998855	CDH1	16	68737292	68835541	1	cadherin 1 [Source:HGNC Symbol;Acc:HGNC:1748]
ENSG00000039523	0.085435	7.0206	0.797425	0.998855	RIPOR1	16	67518418	67546788	1	RHO family interacting cell polarization regulator 1 [Source:HGNC Symbol;Acc:HGNC:25836]
ENSG00000039650	-0.196083	6.75384	0.639947	0.998855	PNKP	19	49859882	49878351	-1	polynucleotide kinase 3'-phosphatase [Source:HGNC Symbol;Acc:HGNC:9154]
ENSG00000041357	0.726621	7.11141	0.208279	0.998855	PSMA4	15	78540405	78552417	1	proteasome 20S subunit alpha 4 [Source:HGNC Symbol;Acc:HGNC:9533]
ENSG00000042445	0.0567741	6.96913	0.871882	0.998855	RETSAT	2	85341955	85354531	-1	retinol saturase [Source:HGNC Symbol;Acc:HGNC:25991]
ENSG00000042493	-0.406835	8.26949	0.274811	0.998855	CAPG	2	85394753	85418432	-1	capping actin protein, gelsolin like [Source:HGNC Symbol;Acc:HGNC:1474]
ENSG00000042753	-0.12124	7.66146	0.797955	0.998855	AP2S1	19	46838136	46850846	-1	adaptor related protein complex 2 subunit sigma 1 [Source:HGNC Symbol;Acc:HGNC:565]
ENSG00000044115	-0.430925	8.99959	0.25776	0.998855	CTNNA1	5	138610967	138935034	1	catenin alpha 1 [Source:HGNC Symbol;Acc:HGNC:2509]
ENSG00000044574	-1.17969	11.1203	0.143371	0.998855	HSPA5	9	125234853	125241343	-1	heat shock protein family A (Hsp70) member 5 [Source:HGNC Symbol;Acc:HGNC:5238]
ENSG00000046604	0.277719	7.31367	0.717314	0.998855	DSG2	18	31498177	31549008	1	desmoglein 2 [Source:HGNC Symbol;Acc:HGNC:3049]
ENSG00000047315	0.744309	6.926	0.246043	0.998855	POLR2B	4	56977722	57031158	1	RNA polymerase II subunit B [Source:HGNC Symbol;Acc:HGNC:9188]
ENSG00000047849	-0.38518	9.20817	0.222128	0.998855	MAP4	3	47850690	48089272	-1	microtubule associated protein 4 [Source:HGNC Symbol;Acc:HGNC:6862]
ENSG00000048140	-0.00883972	6.95746	0.979818	0.998855	TSPAN17	5	176647387	176659054	1	tetraspanin 17 [Source:HGNC Symbol;Acc:HGNC:13594]
ENSG00000048828	0.0535499	7.71789	0.918226	0.998855	FAM120A	9	93451685	93566112	1	family with sequence similarity 120A [Source:HGNC Symbol;Acc:HGNC:13247]
ENSG00000049130	0.189746	8.47235	0.814071	0.998855	KITLG	12	88492793	88580851	-1	KIT ligand [Source:HGNC Symbol;Acc:HGNC:6343]
ENSG00000049239	-1.17855	6.58132	0.0514308	0.998855	H6PD	1	9234774	9271337	1	hexose-6-phosphate dehydrogenase/glucose 1-dehydrogenase [Source:HGNC Symbol;Acc:HGNC:4795]
ENSG00000049656	0.16504	7.60204	0.619076	0.998855	CLPTM1L	5	1317752	1345099	-1	CLPTM1 like [Source:HGNC Symbol;Acc:HGNC:24308]
ENSG00000050820	0.304541	8.0343	0.430118	0.998855	BCAR1	16	75228181	75268053	-1	BCAR1 scaffold protein, Cas family member [Source:HGNC Symbol;Acc:HGNC:971]
ENSG00000051523	-0.0903211	9.62906	0.863032	0.998855	CYBA	16	88643289	88651054	-1	cytochrome b-245 alpha chain [Source:HGNC Symbol;Acc:HGNC:2577]
ENSG00000052344	-0.615857	6.91071	0.088461	0.998855	PRSS8	16	31131433	31135727	-1	serine protease 8 [Source:HGNC Symbol;Acc:HGNC:9491]
ENSG00000052749	0.0519439	7.68669	0.880022	0.998855	RRP12	10	97356358	97426076	-1	ribosomal RNA processing 12 homolog [Source:HGNC Symbol;Acc:HGNC:29100]
ENSG00000053371	-0.570131	6.78153	0.27107	0.998855	AKR7A2	1	19303965	19312146	-1	aldo-keto reductase family 7 member A2 [Source:HGNC Symbol;Acc:HGNC:389]
ENSG00000054118	-0.0641491	7.58028	0.896819	0.998855	THRAP3	1	36224432	36305357	1	thyroid hormone receptor associated protein 3 [Source:HGNC Symbol;Acc:HGNC:22964]
ENSG00000054148	0.24884	7.59265	0.544626	0.998855	PHPT1	9	136848724	136851027	1	phosphohistidine phosphatase 1 [Source:HGNC Symbol;Acc:HGNC:30033]
ENSG00000054598	-0.603787	7.89275	0.071003	0.998855	FOXC1	6	1609915	1613897	1	forkhead box C1 [Source:HGNC Symbol;Acc:HGNC:3800]
ENSG00000055070	-0.122983	7.92155	0.674966	0.998855	SZRD1	1	16352575	16398145	1	SUZ RNA binding domain containing 1 [Source:HGNC Symbol;Acc:HGNC:30232]
ENSG00000055483	0.0558288	7.09712	0.902402	0.998855	USP36	17	78787381	78841441	-1	ubiquitin specific peptidase 36 [Source:HGNC Symbol;Acc:HGNC:20062]
ENSG00000055950	0.0501662	6.97403	0.889415	0.998855	MRPL43	10	100969458	100987515	-1	mitochondrial ribosomal protein L43 [Source:HGNC Symbol;Acc:HGNC:14517]
ENSG00000056097	0.0702569	6.47821	0.923367	0.998855	ZFR	5	32354350	32444740	-1	zinc finger RNA binding protein [Source:HGNC Symbol;Acc:HGNC:17277]
ENSG00000057019	0.398391	9.0338	0.543689	0.998855	DCBLD2	3	98795941	98901695	-1	discoidin, CUB and LCCL domain containing 2 [Source:HGNC Symbol;Acc:HGNC:24627]
ENSG00000057608	0.112835	7.08815	0.831678	0.998855	GDI2	10	5765223	5842132	-1	GDP dissociation inhibitor 2 [Source:HGNC Symbol;Acc:HGNC:4227]
ENSG00000058085	-0.602564	6.81441	0.324559	0.998855	LAMC2	1	183186238	183245127	1	laminin subunit gamma 2 [Source:HGNC Symbol;Acc:HGNC:6493]
ENSG00000058262	0.0502604	8.91982	0.883758	0.998855	SEC61A1	3	128051641	128071683	1	SEC61 translocon subunit alpha 1 [Source:HGNC Symbol;Acc:HGNC:18276]
ENSG00000058600	0.203862	6.922	0.606803	0.998855	POLR3E	16	22297375	22335101	1	RNA polymerase III subunit E [Source:HGNC Symbol;Acc:HGNC:30347]
ENSG00000059122	-0.528394	8.69245	0.337398	0.998855	FLYWCH1	16	2911931	2951208	1	FLYWCH-type zinc finger 1 [Source:HGNC Symbol;Acc:HGNC:25404]
ENSG00000059573	0.0753702	7.55103	0.814934	0.998855	ALDH18A1	10	95605941	95656711	-1	aldehyde dehydrogenase 18 family member A1 [Source:HGNC Symbol;Acc:HGNC:9722]
ENSG00000060138	0.254588	9.89668	0.416264	0.998855	YBX3	12	10699089	10723323	-1	Y-box binding protein 3 [Source:HGNC Symbol;Acc:HGNC:2428]
ENSG00000060237	-0.00141486	6.64504	0.998442	0.998855	WNK1	12	752579	911452	1	WNK lysine deficient protein kinase 1 [Source:HGNC Symbol;Acc:HGNC:14540]
ENSG00000060491	0.278321	8.35384	0.435314	0.998855	OGFR	20	62804835	62814000	1	opioid growth factor receptor [Source:HGNC Symbol;Acc:HGNC:15768]
ENSG00000060656	0.183114	8.09437	0.587459	0.998855	PTPRU	1	29236516	29326813	1	protein tyrosine phosphatase receptor type U [Source:HGNC Symbol;Acc:HGNC:9683]
ENSG00000061676	-0.0112189	6.69277	0.988756	0.998855	NCKAP1	2	182909115	183038858	-1	NCK associated protein 1 [Source:HGNC Symbol;Acc:HGNC:7666]
ENSG00000061938	0.407433	7.26526	0.258594	0.998855	TNK2	3	195863364	195911945	-1	tyrosine kinase non receptor 2 [Source:HGNC Symbol;Acc:HGNC:19297]
ENSG00000062038	0.197861	8.52541	0.502088	0.998855	CDH3	16	68636189	68722616	1	cadherin 3 [Source:HGNC Symbol;Acc:HGNC:1762]
ENSG00000062485	-0.0122554	7.62928	0.970577	0.998855	CS	12	56271699	56300391	-1	citrate synthase [Source:HGNC Symbol;Acc:HGNC:2422]
ENSG00000062716	0.686051	6.98118	0.280992	0.998855	VMP1	17	59707192	59842255	1	vacuole membrane protein 1 [Source:HGNC Symbol;Acc:HGNC:29559]
ENSG00000062822	-0.46079	7.43109	0.372707	0.998855	POLD1	19	50384204	50418018	1	DNA polymerase delta 1, catalytic subunit [Source:HGNC Symbol;Acc:HGNC:9175]
ENSG00000063046	-0.186031	9.74011	0.682126	0.998855	EIF4B	12	53006282	53042215	1	eukaryotic translation initiation factor 4B [Source:HGNC Symbol;Acc:HGNC:3285]
ENSG00000063177	-0.552585	11.0606	0.165771	0.998855	RPL18	19	48615328	48619184	-1	ribosomal protein L18 [Source:HGNC Symbol;Acc:HGNC:10310]
ENSG00000063241	-0.303401	6.88122	0.531815	0.998855	ISOC2	19	55452985	55462343	-1	isochorismatase domain containing 2 [Source:HGNC Symbol;Acc:HGNC:26278]
ENSG00000063244	-0.0310435	8.83266	0.926882	0.998855	U2AF2	19	55654146	55674716	1	U2 small nuclear RNA auxiliary factor 2 [Source:HGNC Symbol;Acc:HGNC:23156]
ENSG00000063245	-0.162147	9.39501	0.813521	0.998855	EPN1	19	55675226	55709858	1	epsin 1 [Source:HGNC Symbol;Acc:HGNC:21604]
ENSG00000063660	0.353993	9.15223	0.439677	0.998855	GPC1	2	240435663	240468076	1	glypican 1 [Source:HGNC Symbol;Acc:HGNC:4449]
ENSG00000064393	-0.263004	6.46659	0.727924	0.998855	HIPK2	7	139561570	139777998	-1	homeodomain interacting protein kinase 2 [Source:HGNC Symbol;Acc:HGNC:14402]
ENSG00000064545	-0.0443158	7.67573	0.902921	0.998855	TMEM161A	19	19119169	19138513	-1	transmembrane protein 161A [Source:HGNC Symbol;Acc:HGNC:26020]
ENSG00000064601	0.134501	6.98125	0.720015	0.998855	CTSA	20	45890144	45898824	1	cathepsin A [Source:HGNC Symbol;Acc:HGNC:9251]
ENSG00000064666	-0.191032	8.58445	0.597437	0.998855	CNN2	19	1026586	1039068	1	calponin 2 [Source:HGNC Symbol;Acc:HGNC:2156]
ENSG00000064687	0.443926	7.71603	0.321832	0.998855	ABCA7	19	1039997	1065572	1	ATP binding cassette subfamily A member 7 [Source:HGNC Symbol;Acc:HGNC:37]
ENSG00000064932	-0.0419261	8.34587	0.907508	0.998855	SBNO2	19	1107637	1174268	-1	strawberry notch homolog 2 [Source:HGNC Symbol;Acc:HGNC:29158]
ENSG00000064961	-0.253456	8.17715	0.536552	0.998855	HMG20B	19	3572777	3579088	1	high mobility group 20B [Source:HGNC Symbol;Acc:HGNC:5002]
ENSG00000065000	-0.238362	8.86229	0.472611	0.998855	AP3D1	19	2100988	2164468	-1	adaptor related protein complex 3 subunit delta 1 [Source:HGNC Symbol;Acc:HGNC:568]
ENSG00000065054	0.349952	7.51946	0.45661	0.998855	SLC9A3R2	16	2025356	2039026	1	SLC9A3 regulator 2 [Source:HGNC Symbol;Acc:HGNC:11076]
ENSG00000065150	-0.0449742	7.65822	0.918607	0.998855	IPO5	13	97953658	98024296	1	importin 5 [Source:HGNC Symbol;Acc:HGNC:6402]
ENSG00000065268	-0.24796	8.09832	0.660086	0.998855	WDR18	19	984332	998438	1	WD repeat domain 18 [Source:HGNC Symbol;Acc:HGNC:17956]
ENSG00000065427	0.19543	7.96346	0.52156	0.998855	KARS1	16	75627474	75648643	-1	lysyl-tRNA synthetase 1 [Source:HGNC Symbol;Acc:HGNC:6215]
ENSG00000065526	0.184735	7.02532	0.786247	0.998855	SPEN	1	15836095	15940456	1	spen family transcriptional repressor [Source:HGNC Symbol;Acc:HGNC:17575]
ENSG00000065717	-0.737801	7.45302	0.0871686	0.998855	TLE2	19	2997639	3047635	-1	TLE family member 2, transcriptional corepressor [Source:HGNC Symbol;Acc:HGNC:11838]
ENSG00000065911	-0.621296	8.08532	0.390646	0.998855	MTHFD2	2	74186172	74217565	1	methylenetetrahydrofolate dehydrogenase (NADP+ dependent) 2, methenyltetrahydrofolate cyclohydrolase [Source:HGNC Symbol;Acc:HGNC:7434]
ENSG00000065978	-0.0106428	10.63	0.972795	0.998855	YBX1	1	42682418	42703805	1	Y-box binding protein 1 [Source:HGNC Symbol;Acc:HGNC:8014]
ENSG00000066044	0.0337422	7.29108	0.915264	0.998855	ELAVL1	19	7958573	8005659	-1	ELAV like RNA binding protein 1 [Source:HGNC Symbol;Acc:HGNC:3312]
ENSG00000066322	0.153379	7.26365	0.620714	0.998855	ELOVL1	1	43363398	43368074	-1	ELOVL fatty acid elongase 1 [Source:HGNC Symbol;Acc:HGNC:14418]
ENSG00000067057	-0.0714273	9.28652	0.86734	0.998855	PFKP	10	3066333	3137718	1	phosphofructokinase, platelet [Source:HGNC Symbol;Acc:HGNC:8878]
ENSG00000067082	0.389312	6.83869	0.630347	0.998855	KLF6	10	3775996	3785281	-1	Kruppel like factor 6 [Source:HGNC Symbol;Acc:HGNC:2235]
ENSG00000067167	0.396115	7.18118	0.519839	0.998855	TRAM1	8	70573218	70608416	-1	translocation associated membrane protein 1 [Source:HGNC Symbol;Acc:HGNC:20568]
ENSG00000067225	-0.217001	11.9278	0.665739	0.998855	PKM	15	72199029	72231822	-1	pyruvate kinase M1/2 [Source:HGNC Symbol;Acc:HGNC:9021]
ENSG00000067560	-0.439531	9.66626	0.234718	0.998855	RHOA	3	49359139	49412998	-1	ras homolog family member A [Source:HGNC Symbol;Acc:HGNC:667]
ENSG00000067704	0.350028	7.14225	0.561105	0.998855	IARS2	1	220094132	220148041	1	isoleucyl-tRNA synthetase 2, mitochondrial [Source:HGNC Symbol;Acc:HGNC:29685]
ENSG00000067829	0.20405	7.24895	0.654885	0.998855	IDH3G	X	153785766	153794523	-1	isocitrate dehydrogenase (NAD(+)) 3 non-catalytic subunit gamma [Source:HGNC Symbol;Acc:HGNC:5386]
ENSG00000068078	0.314218	6.79611	0.409247	0.998855	FGFR3	4	1793293	1808872	1	fibroblast growth factor receptor 3 [Source:HGNC Symbol;Acc:HGNC:3690]
ENSG00000068120	-0.22153	7.71568	0.47298	0.998855	COASY	17	42561467	42566277	1	Coenzyme A synthase [Source:HGNC Symbol;Acc:HGNC:29932]
ENSG00000068137	-0.241162	8.38986	0.566194	0.998855	PLEKHH3	17	42667914	42676994	-1	pleckstrin homology, MyTH4 and FERM domain containing H3 [Source:HGNC Symbol;Acc:HGNC:26105]
ENSG00000068308	0.0485145	7.13148	0.870288	0.998855	OTUD5	X	48922024	48958386	-1	OTU deubiquitinase 5 [Source:HGNC Symbol;Acc:HGNC:25402]
ENSG00000068650	-0.063842	6.87573	0.914959	0.998855	ATP11A	13	112690329	112887168	1	ATPase phospholipid transporting 11A [Source:HGNC Symbol;Acc:HGNC:13552]
ENSG00000068654	0.118342	7.31642	0.751955	0.998855	POLR1A	2	86020216	86106155	-1	RNA polymerase I subunit A [Source:HGNC Symbol;Acc:HGNC:17264]
ENSG00000068697	0.279255	7.19145	0.517794	0.998855	LAPTM4A	2	20032650	20051628	-1	lysosomal protein transmembrane 4 alpha [Source:HGNC Symbol;Acc:HGNC:6924]
ENSG00000069011	-0.465447	7.64028	0.372202	0.998855	PITX1	5	135027734	135034813	-1	paired like homeodomain 1 [Source:HGNC Symbol;Acc:HGNC:9004]
ENSG00000069275	-0.498755	7.73961	0.399836	0.998855	NUCKS1	1	205712822	205750182	-1	nuclear casein kinase and cyclin dependent kinase substrate 1 [Source:HGNC Symbol;Acc:HGNC:29923]
ENSG00000069329	0.319924	6.82671	0.583905	0.998855	VPS35	16	46656132	46689518	-1	VPS35 retromer complex component [Source:HGNC Symbol;Acc:HGNC:13487]
ENSG00000069482	0.332847	7.27381	0.417487	0.998855	GAL	11	68683779	68691175	1	galanin and GMAP prepropeptide [Source:HGNC Symbol;Acc:HGNC:4114]
ENSG00000069849	0.1645	6.88642	0.707349	0.998855	ATP1B3	3	141876124	141926549	1	ATPase Na+/K+ transporting subunit beta 3 [Source:HGNC Symbol;Acc:HGNC:806]
ENSG00000069998	-0.193516	7.19369	0.594917	0.998855	HDHD5	22	17137511	17165287	-1	haloacid dehalogenase like hydrolase domain containing 5 [Source:HGNC Symbol;Acc:HGNC:1843]
ENSG00000070047	0.17074	7.8502	0.599505	0.998855	PHRF1	11	576470	612222	1	PHD and ring finger domains 1 [Source:HGNC Symbol;Acc:HGNC:24351]
ENSG00000070404	0.359907	7.11709	0.318631	0.998855	FSTL3	19	676392	683392	1	follistatin like 3 [Source:HGNC Symbol;Acc:HGNC:3973]
ENSG00000070413	-0.194598	7.82023	0.504964	0.998855	DGCR2	22	19036282	19122454	-1	DiGeorge syndrome critical region gene 2 [Source:HGNC Symbol;Acc:HGNC:2845]
ENSG00000070423	-0.0469116	8.12397	0.903804	0.998855	RNF126	19	647526	663233	-1	ring finger protein 126 [Source:HGNC Symbol;Acc:HGNC:21151]
ENSG00000070756	-0.166315	11.6312	0.633574	0.998855	PABPC1	8	100685816	100722809	-1	poly(A) binding protein cytoplasmic 1 [Source:HGNC Symbol;Acc:HGNC:8554]
ENSG00000070814	-0.0361682	7.74809	0.909394	0.998855	TCOF1	5	150357629	150400308	1	treacle ribosome biogenesis factor 1 [Source:HGNC Symbol;Acc:HGNC:11654]
ENSG00000070831	0.392551	7.78708	0.37006	0.998855	CDC42	1	22025511	22101360	1	cell division cycle 42 [Source:HGNC Symbol;Acc:HGNC:1736]
ENSG00000071054	0.381934	7.23352	0.528072	0.998855	MAP4K4	2	101696850	101894689	1	mitogen-activated protein kinase kinase kinase kinase 4 [Source:HGNC Symbol;Acc:HGNC:6866]
ENSG00000071082	-0.237397	9.24251	0.567036	0.998855	RPL31	2	101002229	101024032	1	ribosomal protein L31 [Source:HGNC Symbol;Acc:HGNC:10334]
ENSG00000071127	0.24362	9.28035	0.437695	0.998855	WDR1	4	10074339	10116949	-1	WD repeat domain 1 [Source:HGNC Symbol;Acc:HGNC:12754]
ENSG00000071462	-0.0499238	7.98299	0.863796	0.998855	BUD23	7	73683025	73705161	1	BUD23 rRNA methyltransferase and ribosome maturation factor [Source:HGNC Symbol;Acc:HGNC:16405]
ENSG00000071553	0.0371291	7.49643	0.913012	0.998855	ATP6AP1	X	154428633	154436516	1	ATPase H+ transporting accessory protein 1 [Source:HGNC Symbol;Acc:HGNC:868]
ENSG00000071564	-0.0963533	8.95653	0.769673	0.998855	TCF3	19	1609290	1652615	-1	transcription factor 3 [Source:HGNC Symbol;Acc:HGNC:11633]
ENSG00000071626	-0.247099	7.98471	0.414023	0.998855	DAZAP1	19	1407569	1435687	1	DAZ associated protein 1 [Source:HGNC Symbol;Acc:HGNC:2683]
ENSG00000071655	-0.0690841	7.28756	0.845911	0.998855	MBD3	19	1573596	1592865	-1	methyl-CpG binding domain protein 3 [Source:HGNC Symbol;Acc:HGNC:6918]
ENSG00000071894	-0.23585	9.18118	0.522103	0.998855	CPSF1	8	144393229	144409335	-1	cleavage and polyadenylation specific factor 1 [Source:HGNC Symbol;Acc:HGNC:2324]
ENSG00000071994	0.303506	6.98966	0.361907	0.998855	PDCD2	6	170575295	170584692	-1	programmed cell death 2 [Source:HGNC Symbol;Acc:HGNC:8762]
ENSG00000072062	-0.139054	7.23071	0.655608	0.998855	PRKACA	19	14091688	14118084	-1	protein kinase cAMP-activated catalytic subunit alpha [Source:HGNC Symbol;Acc:HGNC:9380]
ENSG00000072071	-0.297932	8.05975	0.309523	0.998855	ADGRL1	19	14147743	14206187	-1	adhesion G protein-coupled receptor L1 [Source:HGNC Symbol;Acc:HGNC:20973]
ENSG00000072110	-0.0435601	9.02502	0.885241	0.998855	ACTN1	14	68874128	68979440	-1	actinin alpha 1 [Source:HGNC Symbol;Acc:HGNC:163]
ENSG00000072195	0.356437	7.56233	0.500012	0.998855	SPEG	2	219434843	219493629	1	striated muscle enriched protein kinase [Source:HGNC Symbol;Acc:HGNC:16901]
ENSG00000072274	0.957761	7.84764	0.166349	0.998855	TFRC	3	196027183	196082096	-1	transferrin receptor [Source:HGNC Symbol;Acc:HGNC:11763]
ENSG00000072506	0.262482	6.93516	0.532909	0.998855	HSD17B10	X	53431258	53434370	-1	hydroxysteroid 17-beta dehydrogenase 10 [Source:HGNC Symbol;Acc:HGNC:4800]
ENSG00000072778	0.0916777	9.34714	0.820641	0.998855	ACADVL	17	7217125	7225266	1	acyl-CoA dehydrogenase very long chain [Source:HGNC Symbol;Acc:HGNC:92]
ENSG00000073008	-0.324253	7.51968	0.504384	0.998855	PVR	19	44643798	44666162	1	PVR cell adhesion molecule [Source:HGNC Symbol;Acc:HGNC:9705]
ENSG00000073060	0.204818	7.9092	0.561792	0.998855	SCARB1	12	124776856	124882668	-1	scavenger receptor class B member 1 [Source:HGNC Symbol;Acc:HGNC:1664]
ENSG00000073111	-0.670976	7.49126	0.207861	0.998855	MCM2	3	127598410	127622436	1	minichromosome maintenance complex component 2 [Source:HGNC Symbol;Acc:HGNC:6944]
ENSG00000073169	-0.0881992	6.5722	0.841431	0.998855	SELENOO	22	50200979	50217616	1	selenoprotein O [Source:HGNC Symbol;Acc:HGNC:30395]
ENSG00000073350	-0.074294	9.11395	0.816021	0.998855	LLGL2	17	75525080	75575209	1	LLGL scribble cell polarity complex component 2 [Source:HGNC Symbol;Acc:HGNC:6629]
ENSG00000073792	-0.376613	7.4	0.479794	0.998855	IGF2BP2	3	185643130	185825042	-1	insulin like growth factor 2 mRNA binding protein 2 [Source:HGNC Symbol;Acc:HGNC:28867]
ENSG00000074071	-0.224011	6.97736	0.62847	0.998855	MRPS34	16	1771890	1773150	-1	mitochondrial ribosomal protein S34 [Source:HGNC Symbol;Acc:HGNC:16618]
ENSG00000074181	-0.116455	8.40767	0.69982	0.998855	NOTCH3	19	15159038	15200995	-1	notch receptor 3 [Source:HGNC Symbol;Acc:HGNC:7883]
ENSG00000074370	-0.666557	6.83878	0.0666351	0.998855	ATP2A3	17	3923870	3964464	-1	ATPase sarcoplasmic/endoplasmic reticulum Ca2+ transporting 3 [Source:HGNC Symbol;Acc:HGNC:813]
ENSG00000074800	-0.663831	12.498	0.207776	0.998855	ENO1	1	8861000	8879190	-1	enolase 1 [Source:HGNC Symbol;Acc:HGNC:3350]
ENSG00000074842	-0.34557	7.94712	0.284952	0.998855	MYDGF	19	4641374	4670362	-1	myeloid derived growth factor [Source:HGNC Symbol;Acc:HGNC:16948]
ENSG00000075043	0.0588209	7.59968	0.878239	0.998855	KCNQ2	20	63400208	63472677	-1	potassium voltage-gated channel subfamily Q member 2 [Source:HGNC Symbol;Acc:HGNC:6296]
ENSG00000075275	-0.379291	7.1898	0.453028	0.998855	CELSR1	22	46360834	46537620	-1	cadherin EGF LAG seven-pass G-type receptor 1 [Source:HGNC Symbol;Acc:HGNC:1850]
ENSG00000075415	-0.115444	9.57149	0.753007	0.998855	SLC25A3	12	98593591	98606379	1	solute carrier family 25 member 3 [Source:HGNC Symbol;Acc:HGNC:10989]
ENSG00000075618	-0.111397	10.2609	0.831462	0.998855	FSCN1	7	5592816	5606655	1	fascin actin-bundling protein 1 [Source:HGNC Symbol;Acc:HGNC:11148]
ENSG00000075624	-0.275034	11.9143	0.457612	0.998855	ACTB	7	5526409	5563902	-1	actin beta [Source:HGNC Symbol;Acc:HGNC:132]
ENSG00000075785	0.422317	7.93895	0.314602	0.998855	RAB7A	3	128693669	128825942	1	RAB7A, member RAS oncogene family [Source:HGNC Symbol;Acc:HGNC:9788]
ENSG00000076108	0.00126465	7.15198	0.998338	0.998855	BAZ2A	12	56595596	56636816	-1	bromodomain adjacent to zinc finger domain 2A [Source:HGNC Symbol;Acc:HGNC:962]
ENSG00000076201	-0.250136	7.92591	0.494054	0.998855	PTPN23	3	47381011	47413435	1	protein tyrosine phosphatase non-receptor type 23 [Source:HGNC Symbol;Acc:HGNC:14406]
ENSG00000076826	-0.0186471	6.92873	0.961878	0.998855	CAMSAP3	19	7595863	7618304	1	calmodulin regulated spectrin associated protein family member 3 [Source:HGNC Symbol;Acc:HGNC:29307]
ENSG00000076924	-0.159675	8.44993	0.736994	0.998855	XAB2	19	7619525	7629545	-1	XPA binding protein 2 [Source:HGNC Symbol;Acc:HGNC:14089]
ENSG00000076928	0.230427	8.23427	0.539766	0.998855	ARHGEF1	19	41883173	41930150	1	Rho guanine nucleotide exchange factor 1 [Source:HGNC Symbol;Acc:HGNC:681]
ENSG00000076944	-0.0586495	7.10324	0.885705	0.998855	STXBP2	19	7636881	7647873	1	syntaxin binding protein 2 [Source:HGNC Symbol;Acc:HGNC:11445]
ENSG00000076984	-0.163883	6.95499	0.612326	0.998855	MAP2K7	19	7903843	7914478	1	mitogen-activated protein kinase kinase 7 [Source:HGNC Symbol;Acc:HGNC:6847]
ENSG00000077150	-0.289425	8.68695	0.405658	0.998855	NFKB2	10	102394110	102402524	1	nuclear factor kappa B subunit 2 [Source:HGNC Symbol;Acc:HGNC:7795]
ENSG00000077235	0.143599	8.02	0.630519	0.998855	GTF3C1	16	27459555	27549913	-1	general transcription factor IIIC subunit 1 [Source:HGNC Symbol;Acc:HGNC:4664]
ENSG00000077312	-0.662057	7.27065	0.199296	0.998855	SNRPA	19	40750637	40765389	1	small nuclear ribonucleoprotein polypeptide A [Source:HGNC Symbol;Acc:HGNC:11151]
ENSG00000077549	-0.0597198	7.90853	0.850399	0.998855	CAPZB	1	19338775	19485539	-1	capping actin protein of muscle Z-line subunit beta [Source:HGNC Symbol;Acc:HGNC:1491]
ENSG00000077782	-0.086953	6.83155	0.857794	0.998855	FGFR1	8	38400215	38468834	-1	fibroblast growth factor receptor 1 [Source:HGNC Symbol;Acc:HGNC:3688]
ENSG00000078140	0.280523	6.93612	0.576965	0.998855	UBE2K	4	39698109	39782792	1	ubiquitin conjugating enzyme E2 K [Source:HGNC Symbol;Acc:HGNC:4914]
ENSG00000078369	-0.344035	9.26792	0.35909	0.998855	GNB1	1	1785285	1891117	-1	G protein subunit beta 1 [Source:HGNC Symbol;Acc:HGNC:4396]
ENSG00000078618	0.269949	7.14097	0.708736	0.998855	NRDC	1	51789191	51878937	-1	nardilysin convertase [Source:HGNC Symbol;Acc:HGNC:7995]
ENSG00000078808	0.124218	8.70255	0.694762	0.998855	SDF4	1	1216909	1232067	-1	stromal cell derived factor 4 [Source:HGNC Symbol;Acc:HGNC:24188]
ENSG00000079246	0.359525	8.44797	0.416549	0.998855	XRCC5	2	216107464	216206303	1	X-ray repair cross complementing 5 [Source:HGNC Symbol;Acc:HGNC:12833]
ENSG00000079313	-0.0351379	7.09742	0.921847	0.998855	REXO1	19	1815248	1848483	-1	RNA exonuclease 1 homolog [Source:HGNC Symbol;Acc:HGNC:24616]
ENSG00000079432	-0.136708	7.98968	0.650162	0.998855	CIC	19	42268537	42295797	1	capicua transcriptional repressor [Source:HGNC Symbol;Acc:HGNC:14214]
ENSG00000079459	-0.0181328	7.60349	0.971234	0.998855	FDFT1	8	11795573	11839304	1	farnesyl-diphosphate farnesyltransferase 1 [Source:HGNC Symbol;Acc:HGNC:3629]
ENSG00000079616	-0.689346	6.95295	0.111667	0.998855	KIF22	16	29790719	29805384	1	kinesin family member 22 [Source:HGNC Symbol;Acc:HGNC:6391]
ENSG00000079785	0.566029	6.96513	0.371409	0.998855	DDX1	2	15591178	15634346	1	DEAD-box helicase 1 [Source:HGNC Symbol;Acc:HGNC:2734]
ENSG00000079805	-0.409641	8.86082	0.199926	0.998855	DNM2	19	10718079	10833488	1	dynamin 2 [Source:HGNC Symbol;Acc:HGNC:2974]
ENSG00000079999	0.0373997	7.35181	0.916925	0.998855	KEAP1	19	10486125	10503558	-1	kelch like ECH associated protein 1 [Source:HGNC Symbol;Acc:HGNC:23177]
ENSG00000080819	-0.0586145	7.99851	0.91417	0.998855	CPOX	3	98579446	98593648	-1	coproporphyrinogen oxidase [Source:HGNC Symbol;Acc:HGNC:2321]
ENSG00000080824	1.0485	10.3613	0.193984	0.998855	HSP90AA1	14	102080742	102139699	-1	heat shock protein 90 alpha family class A member 1 [Source:HGNC Symbol;Acc:HGNC:5253]
ENSG00000081154	0.3081	7.01896	0.610848	0.998855	PCNP	3	101574180	101594465	1	PEST proteolytic signal containing nuclear protein [Source:HGNC Symbol;Acc:HGNC:30023]
ENSG00000082153	0.23173	7.48132	0.723832	0.998855	BZW1	2	200810594	200827338	1	basic leucine zipper and W2 domains 1 [Source:HGNC Symbol;Acc:HGNC:18380]
ENSG00000082641	-1.03244	8.88826	0.098341	0.998855	NFE2L1	17	48048329	48061545	1	nuclear factor, erythroid 2 like 1 [Source:HGNC Symbol;Acc:HGNC:7781]
ENSG00000082781	-0.0552823	7.38492	0.858727	0.998855	ITGB5	3	124761948	124901418	-1	integrin subunit beta 5 [Source:HGNC Symbol;Acc:HGNC:6160]
ENSG00000082898	0.483413	6.72167	0.543879	0.998855	XPO1	2	61476032	61538741	-1	exportin 1 [Source:HGNC Symbol;Acc:HGNC:12825]
ENSG00000083845	-0.332734	11.061	0.426446	0.998855	RPS5	19	58386400	58394806	1	ribosomal protein S5 [Source:HGNC Symbol;Acc:HGNC:10426]
ENSG00000083857	0.452454	9.95629	0.532045	0.998855	FAT1	4	186587794	186726722	-1	FAT atypical cadherin 1 [Source:HGNC Symbol;Acc:HGNC:3595]
ENSG00000084090	0.314047	7.29734	0.504054	0.998855	STARD7	2	96184859	96208825	-1	StAR related lipid transfer domain containing 7 [Source:HGNC Symbol;Acc:HGNC:18063]
ENSG00000084092	0.189431	7.33926	0.618598	0.998855	NOA1	4	56963350	56977606	-1	nitric oxide associated 1 [Source:HGNC Symbol;Acc:HGNC:28473]
ENSG00000084112	-0.0838529	7.3738	0.901155	0.998855	SSH1	12	108778191	108857590	-1	slingshot protein phosphatase 1 [Source:HGNC Symbol;Acc:HGNC:30579]
ENSG00000084207	-0.016211	9.65084	0.975083	0.998855	GSTP1	11	67583742	67586656	1	glutathione S-transferase pi 1 [Source:HGNC Symbol;Acc:HGNC:4638]
ENSG00000084234	0.0809608	8.95447	0.874948	0.998855	APLP2	11	130068147	130144811	1	amyloid beta precursor like protein 2 [Source:HGNC Symbol;Acc:HGNC:598]
ENSG00000084623	0.0524572	8.67133	0.869658	0.998855	EIF3I	1	32221077	32245397	1	eukaryotic translation initiation factor 3 subunit I [Source:HGNC Symbol;Acc:HGNC:3272]
ENSG00000084733	0.239141	7.6967	0.69018	0.998855	RAB10	2	26034084	26137454	1	RAB10, member RAS oncogene family [Source:HGNC Symbol;Acc:HGNC:9759]
ENSG00000084754	-0.132472	7.7338	0.665571	0.998855	HADHA	2	26190635	26244672	-1	hydroxyacyl-CoA dehydrogenase trifunctional multienzyme complex subunit alpha [Source:HGNC Symbol;Acc:HGNC:4801]
ENSG00000084774	-0.279393	8.67635	0.390375	0.998855	CAD	2	27217369	27243943	1	carbamoyl-phosphate synthetase 2, aspartate transcarbamylase, and dihydroorotase [Source:HGNC Symbol;Acc:HGNC:1424]
ENSG00000085719	0.555205	6.8496	0.346566	0.998855	CPNE3	8	86514435	86561498	1	copine 3 [Source:HGNC Symbol;Acc:HGNC:2316]
ENSG00000085733	0.742258	8.24054	0.257763	0.998855	CTTN	11	70398404	70436584	1	cortactin [Source:HGNC Symbol;Acc:HGNC:3338]
ENSG00000085872	0.0974222	7.9162	0.802414	0.998855	CHERP	19	16517894	16542437	-1	calcium homeostasis endoplasmic reticulum protein [Source:HGNC Symbol;Acc:HGNC:16930]
ENSG00000085998	0.0267058	7.59834	0.935728	0.998855	POMGNT1	1	46188682	46220305	-1	protein O-linked mannose N-acetylglucosaminyltransferase 1 (beta 1,2-) [Source:HGNC Symbol;Acc:HGNC:19139]
ENSG00000086015	-0.190828	7.60003	0.551662	0.998855	MAST2	1	45786987	46036122	1	microtubule associated serine/threonine kinase 2 [Source:HGNC Symbol;Acc:HGNC:19035]
ENSG00000086232	-0.125273	7.63122	0.751975	0.998855	EIF2AK1	7	6022247	6059175	-1	eukaryotic translation initiation factor 2 alpha kinase 1 [Source:HGNC Symbol;Acc:HGNC:24921]
ENSG00000086598	0.196105	7.70351	0.711921	0.998855	TMED2	12	123584533	123598582	1	transmembrane p24 trafficking protein 2 [Source:HGNC Symbol;Acc:HGNC:16996]
ENSG00000086758	-0.333255	9.01944	0.487602	0.998855	HUWE1	X	53532096	53686728	-1	HECT, UBA and WWE domain containing E3 ubiquitin protein ligase 1 [Source:HGNC Symbol;Acc:HGNC:30892]
ENSG00000087074	-1.107	7.58127	0.170466	0.998855	PPP1R15A	19	48872421	48876058	1	protein phosphatase 1 regulatory subunit 15A [Source:HGNC Symbol;Acc:HGNC:14375]
ENSG00000087077	0.333794	8.12167	0.388681	0.998855	TRIP6	7	100867387	100873454	1	thyroid hormone receptor interactor 6 [Source:HGNC Symbol;Acc:HGNC:12311]
ENSG00000087086	-0.462049	10.8456	0.203389	0.998855	FTL	19	48965309	48966879	1	ferritin light chain [Source:HGNC Symbol;Acc:HGNC:3999]
ENSG00000087087	0.00300476	7.72359	0.99317	0.998855	SRRT	7	100875103	100888664	1	serrate, RNA effector molecule [Source:HGNC Symbol;Acc:HGNC:24101]
ENSG00000087152	-0.21615	7.43687	0.53096	0.998855	ATXN7L3	17	44191805	44200113	-1	ataxin 7 like 3 [Source:HGNC Symbol;Acc:HGNC:25416]
ENSG00000087191	0.27445	7.06732	0.409816	0.998855	PSMC5	17	63827152	63832026	1	proteasome 26S subunit, ATPase 5 [Source:HGNC Symbol;Acc:HGNC:9552]
ENSG00000087274	-0.20974	7.53026	0.506041	0.998855	ADD1	4	2843857	2930076	1	adducin 1 [Source:HGNC Symbol;Acc:HGNC:243]
ENSG00000087365	-0.223544	8.7441	0.480007	0.998855	SF3B2	11	66050729	66069308	1	splicing factor 3b subunit 2 [Source:HGNC Symbol;Acc:HGNC:10769]
ENSG00000087460	-0.357493	10.2803	0.304635	0.998855	GNAS	20	58839718	58911192	1	GNAS complex locus [Source:HGNC Symbol;Acc:HGNC:4392]
ENSG00000088038	-0.365688	7.47123	0.300485	0.998855	CNOT3	19	54137749	54155681	1	CCR4-NOT transcription complex subunit 3 [Source:HGNC Symbol;Acc:HGNC:7879]
ENSG00000088247	-0.244154	9.59745	0.492769	0.998855	KHSRP	19	6413348	6424794	-1	KH-type splicing regulatory protein [Source:HGNC Symbol;Acc:HGNC:6316]
ENSG00000088256	0.0400856	7.28309	0.898388	0.998855	GNA11	19	3094362	3123999	1	G protein subunit alpha 11 [Source:HGNC Symbol;Acc:HGNC:4379]
ENSG00000088325	-0.505612	7.45211	0.117043	0.998855	TPX2	20	31739271	31801805	1	TPX2 microtubule nucleation factor [Source:HGNC Symbol;Acc:HGNC:1249]
ENSG00000088448	0.849195	6.63213	0.304945	0.998855	ANKRD10	13	110878540	110915069	-1	ankyrin repeat domain 10 [Source:HGNC Symbol;Acc:HGNC:20265]
ENSG00000088826	-0.822474	7.0363	0.0704882	0.998855	SMOX	20	4120980	4187747	1	spermine oxidase [Source:HGNC Symbol;Acc:HGNC:15862]
ENSG00000088832	0.304232	7.89692	0.321967	0.998855	FKBP1A	20	1368977	1393164	-1	FKBP prolyl isomerase 1A [Source:HGNC Symbol;Acc:HGNC:3711]
ENSG00000088888	0.0348194	7.83165	0.9374	0.998855	MAVS	20	3846799	3876123	1	mitochondrial antiviral signaling protein [Source:HGNC Symbol;Acc:HGNC:29233]
ENSG00000088930	0.510613	6.8292	0.317624	0.998855	XRN2	20	21303331	21389825	1	5'-3' exoribonuclease 2 [Source:HGNC Symbol;Acc:HGNC:12836]
ENSG00000088986	0.235134	7.01087	0.491658	0.998855	DYNLL1	12	120469850	120498493	1	dynein light chain LC8-type 1 [Source:HGNC Symbol;Acc:HGNC:15476]
ENSG00000089009	-0.0515168	10.3542	0.899584	0.998855	RPL6	12	112405190	112418838	-1	ribosomal protein L6 [Source:HGNC Symbol;Acc:HGNC:10362]
ENSG00000089053	0.303096	7.14524	0.397012	0.998855	ANAPC5	12	121308245	121399896	-1	anaphase promoting complex subunit 5 [Source:HGNC Symbol;Acc:HGNC:15713]
ENSG00000089154	-0.0932798	9.10216	0.774929	0.998855	GCN1	12	120127202	120194715	-1	GCN1 activator of EIF2AK4 [Source:HGNC Symbol;Acc:HGNC:4199]
ENSG00000089157	-0.458409	12.3493	0.238946	0.998855	RPLP0	12	120196699	120201235	-1	ribosomal protein lateral stalk subunit P0 [Source:HGNC Symbol;Acc:HGNC:10371]
ENSG00000089159	0.0263606	8.10383	0.932585	0.998855	PXN	12	120210439	120265771	-1	paxillin [Source:HGNC Symbol;Acc:HGNC:9718]
ENSG00000089220	0.288562	8.01457	0.377972	0.998855	PEBP1	12	118136124	118145584	1	phosphatidylethanolamine binding protein 1 [Source:HGNC Symbol;Acc:HGNC:8630]
ENSG00000089280	-0.0622213	8.40944	0.846202	0.998855	FUS	16	31180138	31191605	1	FUS RNA binding protein [Source:HGNC Symbol;Acc:HGNC:4010]
ENSG00000089327	-0.255932	7.59011	0.466478	0.998855	FXYD5	19	35154730	35169881	1	FXYD domain containing ion transport regulator 5 [Source:HGNC Symbol;Acc:HGNC:4029]
ENSG00000089351	-0.137149	8.29426	0.734815	0.998855	GRAMD1A	19	34994784	35026471	1	GRAM domain containing 1A [Source:HGNC Symbol;Acc:HGNC:29305]
ENSG00000089597	-0.674055	9.80463	0.0550727	0.998855	GANAB	11	62624826	62646726	-1	glucosidase II alpha subunit [Source:HGNC Symbol;Acc:HGNC:4138]
ENSG00000089685	-0.505971	7.11486	0.231806	0.998855	BIRC5	17	78214186	78225636	1	baculoviral IAP repeat containing 5 [Source:HGNC Symbol;Acc:HGNC:593]
ENSG00000089693	-0.0809756	9.6709	0.832536	0.998855	MLF2	12	6747996	6767475	-1	myeloid leukemia factor 2 [Source:HGNC Symbol;Acc:HGNC:7126]
ENSG00000089737	0.312381	7.52569	0.35784	0.998855	DDX24	14	94048287	94081212	-1	DEAD-box helicase 24 [Source:HGNC Symbol;Acc:HGNC:13266]
ENSG00000089820	0.105622	7.89372	0.772585	0.998855	ARHGAP4	X	153907367	153934999	-1	Rho GTPase activating protein 4 [Source:HGNC Symbol;Acc:HGNC:674]
ENSG00000090006	-0.279021	9.81999	0.402668	0.998855	LTBP4	19	40592883	40629818	1	latent transforming growth factor beta binding protein 4 [Source:HGNC Symbol;Acc:HGNC:6717]
ENSG00000090013	-0.161539	7.5634	0.687344	0.998855	BLVRB	19	40447765	40465764	-1	biliverdin reductase B [Source:HGNC Symbol;Acc:HGNC:1063]
ENSG00000090020	-0.957911	6.80656	0.0911552	0.998855	SLC9A1	1	27098809	27166981	-1	solute carrier family 9 member A1 [Source:HGNC Symbol;Acc:HGNC:11071]
ENSG00000090060	0.269475	6.97736	0.706166	0.998855	PAPOLA	14	96501433	96567111	1	poly(A) polymerase alpha [Source:HGNC Symbol;Acc:HGNC:14981]
ENSG00000090097	0.39809	6.66298	0.31407	0.998855	PCBP4	3	51957454	51974016	-1	poly(rC) binding protein 4 [Source:HGNC Symbol;Acc:HGNC:8652]
ENSG00000090273	0.197898	8.19852	0.600031	0.998855	NUDC	1	26900238	26946871	1	nuclear distribution C, dynein complex regulator [Source:HGNC Symbol;Acc:HGNC:8045]
ENSG00000090316	0.33528	7.37908	0.358594	0.998855	MAEA	4	1289887	1340147	1	macrophage erythroblast attacher, E3 ubiquitin ligase [Source:HGNC Symbol;Acc:HGNC:13731]
ENSG00000090372	-0.181635	8.42621	0.563199	0.998855	STRN4	19	46719511	46746994	-1	striatin 4 [Source:HGNC Symbol;Acc:HGNC:15721]
ENSG00000090621	-0.103514	8.49858	0.76767	0.998855	PABPC4	1	39560709	39576790	-1	poly(A) binding protein cytoplasmic 4 [Source:HGNC Symbol;Acc:HGNC:8557]
ENSG00000090863	-0.628523	8.93688	0.273639	0.998855	GLG1	16	74447427	74607144	-1	golgi glycoprotein 1 [Source:HGNC Symbol;Acc:HGNC:4316]
ENSG00000091409	0.307853	6.94806	0.684102	0.998855	ITGA6	2	172427354	172506459	1	integrin subunit alpha 6 [Source:HGNC Symbol;Acc:HGNC:6142]
ENSG00000091527	0.0913178	7.60455	0.883619	0.998855	CDV3	3	133573686	133590261	1	CDV3 homolog [Source:HGNC Symbol;Acc:HGNC:26928]
ENSG00000091542	-0.0962098	7.19205	0.745093	0.998855	ALKBH5	17	18183078	18209954	1	alkB homolog 5, RNA demethylase [Source:HGNC Symbol;Acc:HGNC:25996]
ENSG00000092010	-0.00994222	7.08983	0.977414	0.998855	PSME1	14	24136163	24138967	1	proteasome activator subunit 1 [Source:HGNC Symbol;Acc:HGNC:9568]
ENSG00000092148	0.100706	6.60416	0.911508	0.998855	HECTD1	14	31100112	31207804	-1	HECT domain E3 ubiquitin protein ligase 1 [Source:HGNC Symbol;Acc:HGNC:20157]
ENSG00000092199	-0.284716	9.52791	0.394177	0.998855	HNRNPC	14	21209136	21269494	-1	heterogeneous nuclear ribonucleoprotein C [Source:HGNC Symbol;Acc:HGNC:5035]
ENSG00000092201	0.174586	7.93222	0.783645	0.998855	SUPT16H	14	21351476	21384019	-1	SPT16 homolog, facilitates chromatin remodeling subunit [Source:HGNC Symbol;Acc:HGNC:11465]
ENSG00000092820	0.0742594	11.8186	0.864266	0.998855	EZR	6	158765741	158819368	-1	ezrin [Source:HGNC Symbol;Acc:HGNC:12691]
ENSG00000092841	0.247829	7.42428	0.484064	0.998855	MYL6	12	56158346	56163496	1	myosin light chain 6 [Source:HGNC Symbol;Acc:HGNC:7587]
ENSG00000093010	-0.0602901	7.14505	0.857316	0.998855	COMT	22	19941371	19969975	1	catechol-O-methyltransferase [Source:HGNC Symbol;Acc:HGNC:2228]
ENSG00000095066	-0.18365	7.02562	0.671929	0.998855	HOOK2	19	12763003	12872740	-1	hook microtubule tethering protein 2 [Source:HGNC Symbol;Acc:HGNC:19885]
ENSG00000095139	0.344504	7.21728	0.510209	0.998855	ARCN1	11	118572390	118603033	1	archain 1 [Source:HGNC Symbol;Acc:HGNC:649]
ENSG00000095319	-0.198791	7.52431	0.531073	0.998855	NUP188	9	128947699	129007096	1	nucleoporin 188 [Source:HGNC Symbol;Acc:HGNC:17859]
ENSG00000095787	-0.257762	6.91927	0.741657	0.998855	WAC	10	28532493	28623112	1	WW domain containing adaptor with coiled-coil [Source:HGNC Symbol;Acc:HGNC:17327]
ENSG00000095906	-0.0368848	8.25308	0.953102	0.998855	NUBP2	16	1782932	1789186	1	nucleotide binding protein 2 [Source:HGNC Symbol;Acc:HGNC:8042]
ENSG00000096384	0.162316	11.7962	0.681353	0.998855	HSP90AB1	6	44246166	44253888	1	heat shock protein 90 alpha family class B member 1 [Source:HGNC Symbol;Acc:HGNC:5258]
ENSG00000096433	-0.631072	8.90822	0.108913	0.998855	ITPR3	6	33620365	33696574	1	inositol 1,4,5-trisphosphate receptor type 3 [Source:HGNC Symbol;Acc:HGNC:6182]
ENSG00000096696	0.058882	8.15276	0.925754	0.998855	DSP	6	7541617	7586714	1	desmoplakin [Source:HGNC Symbol;Acc:HGNC:3052]
ENSG00000097007	-0.321507	7.0977	0.343676	0.998855	ABL1	9	130713016	130887675	1	ABL proto-oncogene 1, non-receptor tyrosine kinase [Source:HGNC Symbol;Acc:HGNC:76]
ENSG00000097021	0.0681458	8.15548	0.896268	0.998855	ACOT7	1	6264269	6393767	-1	acyl-CoA thioesterase 7 [Source:HGNC Symbol;Acc:HGNC:24157]
ENSG00000099194	-0.754818	10.046	0.133066	0.998855	SCD	10	100347233	100364826	1	stearoyl-CoA desaturase [Source:HGNC Symbol;Acc:HGNC:10571]
ENSG00000099204	0.411995	7.24911	0.482292	0.998855	ABLIM1	10	114431113	114768061	-1	actin binding LIM protein 1 [Source:HGNC Symbol;Acc:HGNC:78]
ENSG00000099331	-0.152807	7.40527	0.634123	0.998855	MYO9B	19	17075781	17214537	1	myosin IXB [Source:HGNC Symbol;Acc:HGNC:7609]
ENSG00000099341	0.0777319	8.2399	0.829674	0.998855	PSMD8	19	38374536	38383824	1	proteasome 26S subunit, non-ATPase 8 [Source:HGNC Symbol;Acc:HGNC:9566]
ENSG00000099364	0.189695	7.52074	0.577766	0.998855	FBXL19	16	30923055	30948783	1	F-box and leucine rich repeat protein 19 [Source:HGNC Symbol;Acc:HGNC:25300]
ENSG00000099399	0.287215	7.41185	0.370093	0.998855	MAGEB2	X	30215563	30220089	1	MAGE family member B2 [Source:HGNC Symbol;Acc:HGNC:6809]
ENSG00000099622	-0.504495	8.19945	0.184248	0.998855	CIRBP	19	1259384	1274880	1	cold inducible RNA binding protein [Source:HGNC Symbol;Acc:HGNC:1982]
ENSG00000099624	-0.0912689	8.85927	0.873704	0.998855	ATP5F1D	19	1241746	1244825	1	ATP synthase F1 subunit delta [Source:HGNC Symbol;Acc:HGNC:837]
ENSG00000099625	0.401731	8.00186	0.512884	0.998855	CBARP	19	1228287	1238027	-1	CACN subunit beta associated regulatory protein [Source:HGNC Symbol;Acc:HGNC:28617]
ENSG00000099783	0.141696	8.74542	0.729569	0.998855	HNRNPM	19	8444767	8489114	1	heterogeneous nuclear ribonucleoprotein M [Source:HGNC Symbol;Acc:HGNC:5046]
ENSG00000099795	-0.133354	6.83122	0.767887	0.998855	NDUFB7	19	14566078	14572066	-1	NADH:ubiquinone oxidoreductase subunit B7 [Source:HGNC Symbol;Acc:HGNC:7702]
ENSG00000099797	-0.642102	7.85911	0.212054	0.998855	TECR	19	14517085	14565980	1	trans-2,3-enoyl-CoA reductase [Source:HGNC Symbol;Acc:HGNC:4551]
ENSG00000099800	0.192029	6.98606	0.69941	0.998855	TIMM13	19	2425625	2427586	-1	translocase of inner mitochondrial membrane 13 [Source:HGNC Symbol;Acc:HGNC:11816]
ENSG00000099804	-0.145173	7.69433	0.750575	0.998855	CDC34	19	531760	542092	1	cell division cycle 34, ubiqiutin conjugating enzyme [Source:HGNC Symbol;Acc:HGNC:1734]
ENSG00000099810	0.347823	6.81238	0.586018	0.998855	MTAP	9	21802636	21937651	1	methylthioadenosine phosphorylase [Source:HGNC Symbol;Acc:HGNC:7413]
ENSG00000099812	0.495715	7.89385	0.339887	0.998855	MISP	19	751112	764318	1	mitotic spindle positioning [Source:HGNC Symbol;Acc:HGNC:27000]
ENSG00000099814	0.42624	8.88835	0.228924	0.998855	CEP170B	14	104865268	104896770	1	centrosomal protein 170B [Source:HGNC Symbol;Acc:HGNC:20362]
ENSG00000099817	-0.110512	9.02983	0.817941	0.998855	POLR2E	19	1086574	1095380	-1	RNA polymerase II, I and III subunit E [Source:HGNC Symbol;Acc:HGNC:9192]
ENSG00000099821	0.127912	9.58076	0.798612	0.998855	POLRMT	19	617221	633537	-1	RNA polymerase mitochondrial [Source:HGNC Symbol;Acc:HGNC:9200]
ENSG00000099864	-0.692272	7.24407	0.0922637	0.998855	PALM	19	708935	748329	1	paralemmin [Source:HGNC Symbol;Acc:HGNC:8594]
ENSG00000099875	-0.727707	9.4002	0.0951695	0.998855	MKNK2	19	2037465	2051244	-1	MAPK interacting serine/threonine kinase 2 [Source:HGNC Symbol;Acc:HGNC:7111]
ENSG00000099889	0.710431	6.99689	0.0733348	0.998855	ARVCF	22	19969896	20016823	-1	ARVCF delta catenin family member [Source:HGNC Symbol;Acc:HGNC:728]
ENSG00000099901	0.00092064	7.30855	0.997956	0.998855	RANBP1	22	20115938	20127355	1	RAN binding protein 1 [Source:HGNC Symbol;Acc:HGNC:9847]
ENSG00000099904	0.481149	7.91389	0.145553	0.998855	ZDHHC8	22	20129456	20148007	1	zinc finger DHHC-type palmitoyltransferase 8 [Source:HGNC Symbol;Acc:HGNC:18474]
ENSG00000099917	0.119848	7.52158	0.703086	0.998855	MED15	22	20495913	20587632	1	mediator complex subunit 15 [Source:HGNC Symbol;Acc:HGNC:14248]
ENSG00000099942	0.0637449	7.18399	0.881986	0.998855	CRKL	22	20917407	20953747	1	CRK like proto-oncogene, adaptor protein [Source:HGNC Symbol;Acc:HGNC:2363]
ENSG00000099956	-0.21025	7.6807	0.567886	0.998855	SMARCB1	22	23786931	23838009	1	SWI/SNF related, matrix associated, actin dependent regulator of chromatin, subfamily b, member 1 [Source:HGNC Symbol;Acc:HGNC:11103]
ENSG00000099991	-0.258812	7.5906	0.425644	0.998855	CABIN1	22	24011192	24178628	1	calcineurin binding protein 1 [Source:HGNC Symbol;Acc:HGNC:24187]
ENSG00000099995	0.123489	8.17142	0.71376	0.998855	SF3A1	22	30331988	30356919	-1	splicing factor 3a subunit 1 [Source:HGNC Symbol;Acc:HGNC:10765]
ENSG00000100029	0.213402	8.63452	0.534381	0.998855	PES1	22	30576625	30607083	-1	pescadillo ribosomal biogenesis factor 1 [Source:HGNC Symbol;Acc:HGNC:8848]
ENSG00000100030	0.173544	6.93937	0.754243	0.998855	MAPK1	22	21759657	21867680	-1	mitogen-activated protein kinase 1 [Source:HGNC Symbol;Acc:HGNC:6871]
ENSG00000100065	-0.101578	6.98284	0.750044	0.998855	CARD10	22	37490362	37519542	-1	caspase recruitment domain family member 10 [Source:HGNC Symbol;Acc:HGNC:16422]
ENSG00000100075	-0.371632	8.65789	0.541293	0.998855	SLC25A1	22	19175581	19178739	-1	solute carrier family 25 member 1 [Source:HGNC Symbol;Acc:HGNC:10979]
ENSG00000100083	-0.0069217	7.45262	0.982441	0.998855	GGA1	22	37608725	37633564	1	golgi associated, gamma adaptin ear containing, ARF binding protein 1 [Source:HGNC Symbol;Acc:HGNC:17842]
ENSG00000100106	-0.439253	9.2729	0.253929	0.998855	TRIOBP	22	37697048	37776556	1	TRIO and F-actin binding protein [Source:HGNC Symbol;Acc:HGNC:17009]
ENSG00000100116	-0.62467	6.95769	0.128146	0.998855	GCAT	22	37807905	37817176	1	glycine C-acetyltransferase [Source:HGNC Symbol;Acc:HGNC:4188]
ENSG00000100129	-0.226476	8.10733	0.445254	0.998855	EIF3L	22	37848868	37889407	1	eukaryotic translation initiation factor 3 subunit L [Source:HGNC Symbol;Acc:HGNC:18138]
ENSG00000100138	-0.0297301	7.79893	0.922979	0.998855	SNU13	22	41673933	41690504	-1	small nuclear ribonucleoprotein 13 [Source:HGNC Symbol;Acc:HGNC:7819]
ENSG00000100139	0.211293	7.11327	0.589754	0.998855	MICALL1	22	37905657	37942822	1	MICAL like 1 [Source:HGNC Symbol;Acc:HGNC:29804]
ENSG00000100201	0.0678623	7.59659	0.930865	0.998855	DDX17	22	38483438	38507660	-1	DEAD-box helicase 17 [Source:HGNC Symbol;Acc:HGNC:2740]
ENSG00000100219	-0.709332	6.9592	0.0748931	0.998855	XBP1	22	28794555	28800597	-1	X-box binding protein 1 [Source:HGNC Symbol;Acc:HGNC:12801]
ENSG00000100221	-0.431608	7.1656	0.367342	0.998855	JOSD1	22	38685543	38701556	-1	Josephin domain containing 1 [Source:HGNC Symbol;Acc:HGNC:28953]
ENSG00000100227	-0.268049	7.59217	0.383389	0.998855	POLDIP3	22	42583721	42614962	-1	DNA polymerase delta interacting protein 3 [Source:HGNC Symbol;Acc:HGNC:23782]
ENSG00000100241	-0.121927	8.62209	0.709474	0.998855	SBF1	22	50445000	50475035	-1	SET binding factor 1 [Source:HGNC Symbol;Acc:HGNC:10542]
ENSG00000100243	-0.0726182	8.88551	0.870228	0.998855	CYB5R3	22	42617840	42649392	-1	cytochrome b5 reductase 3 [Source:HGNC Symbol;Acc:HGNC:2873]
ENSG00000100258	0.0620975	7.28742	0.863197	0.998855	LMF2	22	50502949	50507702	-1	lipase maturation factor 2 [Source:HGNC Symbol;Acc:HGNC:25096]
ENSG00000100280	0.155163	8.11306	0.711719	0.998855	AP1B1	22	29327680	29423179	-1	adaptor related protein complex 1 subunit beta 1 [Source:HGNC Symbol;Acc:HGNC:554]
ENSG00000100297	-0.63371	7.90696	0.268303	0.998855	MCM5	22	35400134	35425431	1	minichromosome maintenance complex component 5 [Source:HGNC Symbol;Acc:HGNC:6948]
ENSG00000100300	0.123126	8.05369	0.790026	0.998855	TSPO	22	43151547	43163242	1	translocator protein [Source:HGNC Symbol;Acc:HGNC:1158]
ENSG00000100304	0.035688	8.73093	0.926702	0.998855	TTLL12	22	43166622	43187134	-1	tubulin tyrosine ligase like 12 [Source:HGNC Symbol;Acc:HGNC:28974]
ENSG00000100316	-0.495123	12.2394	0.11969	0.998855	RPL3	22	39312882	39320389	-1	ribosomal protein L3 [Source:HGNC Symbol;Acc:HGNC:10332]
ENSG00000100320	-0.0241918	7.26623	0.965041	0.998855	RBFOX2	22	35738736	36028824	-1	RNA binding fox-1 homolog 2 [Source:HGNC Symbol;Acc:HGNC:9906]
ENSG00000100325	0.121148	6.92619	0.70766	0.998855	ASCC2	22	29788609	29838304	-1	activating signal cointegrator 1 complex subunit 2 [Source:HGNC Symbol;Acc:HGNC:24103]
ENSG00000100345	-0.313823	10.3323	0.324503	0.998855	MYH9	22	36281280	36387967	-1	myosin heavy chain 9 [Source:HGNC Symbol;Acc:HGNC:7579]
ENSG00000100348	0.0262456	6.99407	0.940682	0.998855	TXN2	22	36467046	36481640	-1	thioredoxin 2 [Source:HGNC Symbol;Acc:HGNC:17772]
ENSG00000100353	0.0392838	8.923	0.90323	0.998855	EIF3D	22	36510855	36529184	-1	eukaryotic translation initiation factor 3 subunit D [Source:HGNC Symbol;Acc:HGNC:3278]
ENSG00000100364	0.182079	7.71309	0.607025	0.998855	KIAA0930	22	45192244	45240894	-1	KIAA0930 [Source:HGNC Symbol;Acc:HGNC:1314]
ENSG00000100380	0.291519	8.36028	0.52667	0.998855	ST13	22	40824535	40856639	-1	ST13 Hsp70 interacting protein [Source:HGNC Symbol;Acc:HGNC:11343]
ENSG00000100401	0.124878	8.69851	0.709569	0.998855	RANGAP1	22	41244779	41286187	-1	Ran GTPase activating protein 1 [Source:HGNC Symbol;Acc:HGNC:9854]
ENSG00000100403	0.0083055	7.47815	0.97916	0.998855	ZC3H7B	22	41301525	41360147	1	zinc finger CCCH-type containing 7B [Source:HGNC Symbol;Acc:HGNC:30869]
ENSG00000100412	-0.140792	7.6902	0.669297	0.998855	ACO2	22	41447830	41529273	1	aconitase 2 [Source:HGNC Symbol;Acc:HGNC:118]
ENSG00000100462	0.307066	6.86271	0.397045	0.998855	PRMT5	14	22920525	22929408	-1	protein arginine methyltransferase 5 [Source:HGNC Symbol;Acc:HGNC:10894]
ENSG00000100504	0.379437	8.3031	0.457719	0.998855	PYGL	14	50857891	50944483	-1	glycogen phosphorylase L [Source:HGNC Symbol;Acc:HGNC:9725]
ENSG00000100591	0.48598	7.29882	0.189853	0.998855	AHSA1	14	77457870	77469472	1	activator of HSP90 ATPase activity 1 [Source:HGNC Symbol;Acc:HGNC:1189]
ENSG00000100599	-0.0089751	6.67051	0.98363	0.998855	RIN3	14	92513781	92688994	1	Ras and Rab interactor 3 [Source:HGNC Symbol;Acc:HGNC:18751]
ENSG00000100605	-0.138075	7.25204	0.692426	0.998855	ITPK1	14	92936914	93116320	-1	inositol-tetrakisphosphate 1-kinase [Source:HGNC Symbol;Acc:HGNC:6177]
ENSG00000100632	0.178286	6.7468	0.700908	0.998855	ERH	14	69380128	69398299	-1	ERH mRNA splicing and mitosis factor [Source:HGNC Symbol;Acc:HGNC:3447]
ENSG00000100650	0.375797	7.60619	0.533517	0.998855	SRSF5	14	69726900	69772005	1	serine and arginine rich splicing factor 5 [Source:HGNC Symbol;Acc:HGNC:10787]
ENSG00000100664	0.289538	7.38274	0.666877	0.998855	EIF5	14	103333544	103345025	1	eukaryotic translation initiation factor 5 [Source:HGNC Symbol;Acc:HGNC:3299]
ENSG00000100714	-0.139617	7.05852	0.693302	0.998855	MTHFD1	14	64388031	64463457	1	methylenetetrahydrofolate dehydrogenase, cyclohydrolase and formyltetrahydrofolate synthetase 1 [Source:HGNC Symbol;Acc:HGNC:7432]
ENSG00000100726	0.239197	7.1263	0.515333	0.998855	TELO2	16	1493344	1510457	1	telomere maintenance 2 [Source:HGNC Symbol;Acc:HGNC:29099]
ENSG00000100804	0.239583	7.58671	0.510592	0.998855	PSMB5	14	23016543	23035230	-1	proteasome 20S subunit beta 5 [Source:HGNC Symbol;Acc:HGNC:9542]
ENSG00000100811	0.244752	7.2956	0.640519	0.998855	YY1	14	100238298	100282788	1	YY1 transcription factor [Source:HGNC Symbol;Acc:HGNC:12856]
ENSG00000100813	0.0694231	7.54528	0.889229	0.998855	ACIN1	14	23058564	23095614	-1	apoptotic chromatin condensation inducer 1 [Source:HGNC Symbol;Acc:HGNC:17066]
ENSG00000100823	-0.00403177	8.18627	0.990106	0.998855	APEX1	14	20455191	20457772	1	apurinic/apyrimidinic endodeoxyribonuclease 1 [Source:HGNC Symbol;Acc:HGNC:587]
ENSG00000100941	0.425707	6.66052	0.710311	0.998855	PNN	14	39175183	39183220	1	pinin, desmosome associated protein [Source:HGNC Symbol;Acc:HGNC:9162]
ENSG00000100983	-0.234476	7.53121	0.498507	0.998855	GSS	20	34928432	34956027	-1	glutathione synthetase [Source:HGNC Symbol;Acc:HGNC:4624]
ENSG00000100991	-0.0273073	7.16638	0.926893	0.998855	TRPC4AP	20	35002404	35092807	-1	transient receptor potential cation channel subfamily C member 4 associated protein [Source:HGNC Symbol;Acc:HGNC:16181]
ENSG00000101057	-0.714675	6.91641	0.207397	0.998855	MYBL2	20	43667019	43716495	1	MYB proto-oncogene like 2 [Source:HGNC Symbol;Acc:HGNC:7548]
ENSG00000101104	-1.25448	6.6961	0.377653	0.998855	PABPC1L	20	44910060	44959035	1	poly(A) binding protein cytoplasmic 1 like [Source:HGNC Symbol;Acc:HGNC:15797]
ENSG00000101150	0.16147	8.30322	0.58628	0.998855	TPD52L2	20	63865228	63891545	1	TPD52 like 2 [Source:HGNC Symbol;Acc:HGNC:12007]
ENSG00000101152	0.0499768	7.12237	0.866614	0.998855	DNAJC5	20	63895126	63936031	1	DnaJ heat shock protein family (Hsp40) member C5 [Source:HGNC Symbol;Acc:HGNC:16235]
ENSG00000101158	0.356211	6.70223	0.424879	0.998855	NELFCD	20	58981208	58995133	1	negative elongation factor complex member C/D [Source:HGNC Symbol;Acc:HGNC:15934]
ENSG00000101160	0.0391553	7.91033	0.900041	0.998855	CTSZ	20	58995185	59007254	-1	cathepsin Z [Source:HGNC Symbol;Acc:HGNC:2547]
ENSG00000101161	-0.0638109	7.88319	0.85447	0.998855	PRPF6	20	63981132	64033100	1	pre-mRNA processing factor 6 [Source:HGNC Symbol;Acc:HGNC:15860]
ENSG00000101182	0.203098	8.65076	0.518877	0.998855	PSMA7	20	62136733	62143440	-1	proteasome 20S subunit alpha 7 [Source:HGNC Symbol;Acc:HGNC:9536]
ENSG00000101187	-0.373955	7.27231	0.238735	0.998855	SLCO4A1	20	62642503	62685785	1	solute carrier organic anion transporter family member 4A1 [Source:HGNC Symbol;Acc:HGNC:10953]
ENSG00000101188	-0.725204	10.2834	0.0526464	0.998855	NTSR1	20	62708836	62762771	1	neurotensin receptor 1 [Source:HGNC Symbol;Acc:HGNC:8039]
ENSG00000101199	0.467944	7.90005	0.115242	0.998855	ARFGAP1	20	63272785	63289790	1	ADP ribosylation factor GTPase activating protein 1 [Source:HGNC Symbol;Acc:HGNC:15852]
ENSG00000101210	-0.147386	11.7414	0.800041	0.998855	EEF1A2	20	63488013	63499239	-1	eukaryotic translation elongation factor 1 alpha 2 [Source:HGNC Symbol;Acc:HGNC:3192]
ENSG00000101220	-0.0873452	7.49064	0.862426	0.998855	C20orf27	20	3753508	3767781	-1	chromosome 20 open reading frame 27 [Source:HGNC Symbol;Acc:HGNC:15873]
ENSG00000101266	-0.305817	8.09693	0.52919	0.998855	CSNK2A1	20	472498	543835	-1	casein kinase 2 alpha 1 [Source:HGNC Symbol;Acc:HGNC:2457]
ENSG00000101294	-0.120633	8.11453	0.709883	0.998855	HM13	20	31514410	31577923	1	histocompatibility minor 13 [Source:HGNC Symbol;Acc:HGNC:16435]
ENSG00000101310	0.294791	7.45068	0.463421	0.998855	SEC23B	20	18507520	18561415	1	SEC23 homolog B, COPII coat complex component [Source:HGNC Symbol;Acc:HGNC:10702]
ENSG00000101337	-0.0609874	7.1711	0.874661	0.998855	TM9SF4	20	32109714	32167258	1	transmembrane 9 superfamily member 4 [Source:HGNC Symbol;Acc:HGNC:30797]
ENSG00000101361	0.175729	8.2218	0.583657	0.998855	NOP56	20	2652593	2658393	1	NOP56 ribonucleoprotein [Source:HGNC Symbol;Acc:HGNC:15911]
ENSG00000101365	0.239901	7.07366	0.462142	0.998855	IDH3B	20	2658395	2664219	-1	isocitrate dehydrogenase (NAD(+)) 3 non-catalytic subunit beta [Source:HGNC Symbol;Acc:HGNC:5385]
ENSG00000101367	0.423127	7.44596	0.259974	0.998855	MAPRE1	20	32819954	32850405	1	microtubule associated protein RP/EB family member 1 [Source:HGNC Symbol;Acc:HGNC:6890]
ENSG00000101421	0.179383	6.8962	0.601502	0.998855	CHMP4B	20	33811348	33854366	1	charged multivesicular body protein 4B [Source:HGNC Symbol;Acc:HGNC:16171]
ENSG00000101439	0.500521	8.69931	0.305439	0.998855	CST3	20	23626706	23638473	-1	cystatin C [Source:HGNC Symbol;Acc:HGNC:2475]
ENSG00000101444	0.0276554	9.4872	0.950051	0.998855	AHCY	20	34280268	34311802	-1	adenosylhomocysteinase [Source:HGNC Symbol;Acc:HGNC:343]
ENSG00000101474	0.0492066	7.47375	0.89109	0.998855	APMAP	20	24962925	24992751	-1	adipocyte plasma membrane associated protein [Source:HGNC Symbol;Acc:HGNC:13238]
ENSG00000101558	-0.165697	7.41016	0.740363	0.998855	VAPA	18	9914016	9960021	1	VAMP associated protein A [Source:HGNC Symbol;Acc:HGNC:12648]
ENSG00000101608	0.157542	7.53496	0.661169	0.998855	MYL12A	18	3247481	3256236	1	myosin light chain 12A [Source:HGNC Symbol;Acc:HGNC:16701]
ENSG00000101940	-0.317586	7.07448	0.369086	0.998855	WDR13	X	48590042	48608869	1	WD repeat domain 13 [Source:HGNC Symbol;Acc:HGNC:14352]
ENSG00000102119	-0.316252	7.23523	0.355705	0.998855	EMD	X	154379273	154381523	1	emerin [Source:HGNC Symbol;Acc:HGNC:3331]
ENSG00000102144	-0.327351	9.27294	0.499923	0.998855	PGK1	X	77910739	78129295	1	phosphoglycerate kinase 1 [Source:HGNC Symbol;Acc:HGNC:8896]
ENSG00000102172	0.255984	7.29128	0.487132	0.998855	SMS	X	21940709	21994837	1	spermine synthase [Source:HGNC Symbol;Acc:HGNC:11123]
ENSG00000102225	-0.559103	8.02958	0.0941015	0.998855	CDK16	X	47217860	47229997	1	cyclin dependent kinase 16 [Source:HGNC Symbol;Acc:HGNC:8749]
ENSG00000102226	-0.401321	7.72859	0.320208	0.998855	USP11	X	47232866	47248328	1	ubiquitin specific peptidase 11 [Source:HGNC Symbol;Acc:HGNC:12609]
ENSG00000102265	-0.458196	8.36101	0.195874	0.998855	TIMP1	X	47582408	47586789	1	TIMP metallopeptidase inhibitor 1 [Source:HGNC Symbol;Acc:HGNC:11820]
ENSG00000102317	0.34125	7.14283	0.367716	0.998855	RBM3	X	48574449	48581162	1	RNA binding motif protein 3 [Source:HGNC Symbol;Acc:HGNC:9900]
ENSG00000102554	0.00316877	7.11859	0.995432	0.998855	KLF5	13	73054976	73077541	1	Kruppel like factor 5 [Source:HGNC Symbol;Acc:HGNC:6349]
ENSG00000102699	0.333583	6.94245	0.559563	0.998855	PARP4	13	24420931	24512778	-1	poly(ADP-ribose) polymerase family member 4 [Source:HGNC Symbol;Acc:HGNC:271]
ENSG00000102804	-0.126159	8.71793	0.823112	0.998855	TSC22D1	13	44432143	44577147	-1	TSC22 domain family member 1 [Source:HGNC Symbol;Acc:HGNC:16826]
ENSG00000102854	0.339108	7.93034	0.364159	0.998855	MSLN	16	760734	768865	1	mesothelin [Source:HGNC Symbol;Acc:HGNC:7371]
ENSG00000102858	0.530565	7.57568	0.0999342	0.998855	MGRN1	16	4616493	4690974	1	mahogunin ring finger 1 [Source:HGNC Symbol;Acc:HGNC:20254]
ENSG00000102882	-0.502618	6.85298	0.293276	0.998855	MAPK3	16	30114105	30123506	-1	mitogen-activated protein kinase 3 [Source:HGNC Symbol;Acc:HGNC:6877]
ENSG00000102890	-0.356095	7.16108	0.269237	0.998855	ELMO3	16	67199111	67204029	1	engulfment and cell motility 3 [Source:HGNC Symbol;Acc:HGNC:17289]
ENSG00000102898	0.34108	7.16976	0.397514	0.998855	NUTF2	16	67846923	67872567	1	nuclear transport factor 2 [Source:HGNC Symbol;Acc:HGNC:13722]
ENSG00000102900	0.0451399	7.07639	0.897932	0.998855	NUP93	16	56730118	56850286	1	nucleoporin 93 [Source:HGNC Symbol;Acc:HGNC:28958]
ENSG00000102996	-0.384949	7.91179	0.231065	0.998855	MMP15	16	58025754	58046901	1	matrix metallopeptidase 15 [Source:HGNC Symbol;Acc:HGNC:7161]
ENSG00000103005	0.397753	7.01186	0.216174	0.998855	USB1	16	57999546	58021618	1	U6 snRNA biogenesis phosphodiesterase 1 [Source:HGNC Symbol;Acc:HGNC:25792]
ENSG00000103018	-0.0401551	9.05059	0.924028	0.998855	CYB5B	16	69424619	69466264	1	cytochrome b5 type B [Source:HGNC Symbol;Acc:HGNC:24374]
ENSG00000103024	0.0504631	7.52517	0.904505	0.998855	NME3	16	1770286	1771730	-1	NME/NM23 nucleoside diphosphate kinase 3 [Source:HGNC Symbol;Acc:HGNC:7851]
ENSG00000103148	-0.135731	6.74342	0.768183	0.998855	NPRL3	16	84271	138677	-1	NPR3 like, GATOR1 complex subunit [Source:HGNC Symbol;Acc:HGNC:14124]
ENSG00000103168	0.445097	7.44294	0.292086	0.998855	TAF1C	16	84177847	84187070	-1	TATA-box binding protein associated factor, RNA polymerase I subunit C [Source:HGNC Symbol;Acc:HGNC:11534]
ENSG00000103187	0.232049	9.0767	0.531406	0.998855	COTL1	16	84565596	84618078	-1	coactosin like F-actin binding protein 1 [Source:HGNC Symbol;Acc:HGNC:18304]
ENSG00000103194	0.0361627	7.70923	0.931441	0.998855	USP10	16	84699986	84779922	1	ubiquitin specific peptidase 10 [Source:HGNC Symbol;Acc:HGNC:12608]
ENSG00000103197	0.0900623	7.50962	0.786702	0.998855	TSC2	16	2047967	2089491	1	TSC complex subunit 2 [Source:HGNC Symbol;Acc:HGNC:12363]
ENSG00000103202	-0.211672	6.79721	0.607365	0.998855	NME4	16	396725	410367	1	NME/NM23 nucleoside diphosphate kinase 4 [Source:HGNC Symbol;Acc:HGNC:7852]
ENSG00000103222	0.279894	7.90091	0.443046	0.998855	ABCC1	16	15949138	16143257	1	ATP binding cassette subfamily C member 1 [Source:HGNC Symbol;Acc:HGNC:51]
ENSG00000103249	0.274368	7.00035	0.419079	0.998855	CLCN7	16	1444934	1475084	-1	chloride voltage-gated channel 7 [Source:HGNC Symbol;Acc:HGNC:2025]
ENSG00000103253	0.0144878	6.85387	0.969785	0.998855	HAGHL	16	726936	735525	1	hydroxyacylglutathione hydrolase like [Source:HGNC Symbol;Acc:HGNC:14177]
ENSG00000103254	-0.0310086	7.2971	0.941664	0.998855	ANTKMT	16	720581	722590	1	adenine nucleotide translocase lysine methyltransferase [Source:HGNC Symbol;Acc:HGNC:14152]
ENSG00000103260	-0.183579	9.04214	0.786866	0.998855	METRN	16	715118	719655	1	meteorin, glial cell differentiation regulator [Source:HGNC Symbol;Acc:HGNC:14151]
ENSG00000103266	-0.0329729	6.95325	0.940365	0.998855	STUB1	16	680224	682870	1	STIP1 homology and U-box containing protein 1 [Source:HGNC Symbol;Acc:HGNC:11427]
ENSG00000103275	-0.355871	7.3775	0.232903	0.998855	UBE2I	16	1308880	1327018	1	ubiquitin conjugating enzyme E2 I [Source:HGNC Symbol;Acc:HGNC:12485]
ENSG00000103326	0.0454882	7.48607	0.915542	0.998855	CAPN15	16	527712	554636	1	calpain 15 [Source:HGNC Symbol;Acc:HGNC:11182]
ENSG00000103335	0.0365048	8.92738	0.91621	0.998855	PIEZO1	16	88715338	88785220	-1	piezo type mechanosensitive ion channel component 1 [Source:HGNC Symbol;Acc:HGNC:28993]
ENSG00000103342	0.301718	7.70509	0.397794	0.998855	GSPT1	16	11868128	11916082	-1	G1 to S phase transition 1 [Source:HGNC Symbol;Acc:HGNC:4621]
ENSG00000103353	0.270895	6.95534	0.502961	0.998855	UBFD1	16	23557721	23574389	1	ubiquitin family domain containing 1 [Source:HGNC Symbol;Acc:HGNC:30565]
ENSG00000103363	0.124339	7.84869	0.739309	0.998855	ELOB	16	2771414	2777280	-1	elongin B [Source:HGNC Symbol;Acc:HGNC:11619]
ENSG00000103415	0.572852	6.838	0.107285	0.998855	HMOX2	16	4474690	4510347	1	heme oxygenase 2 [Source:HGNC Symbol;Acc:HGNC:5014]
ENSG00000103423	-0.235596	7.61528	0.57073	0.998855	DNAJA3	16	4425805	4456775	1	DnaJ heat shock protein family (Hsp40) member A3 [Source:HGNC Symbol;Acc:HGNC:11808]
ENSG00000103495	-0.232956	6.6287	0.762333	0.998855	MAZ	16	29806106	29811164	1	MYC associated zinc finger protein [Source:HGNC Symbol;Acc:HGNC:6914]
ENSG00000103502	-0.0182553	6.96061	0.959309	0.998855	CDIPT	16	29858357	29863414	-1	CDP-diacylglycerol--inositol 3-phosphatidyltransferase [Source:HGNC Symbol;Acc:HGNC:1769]
ENSG00000103507	-0.300186	7.30856	0.467918	0.998855	BCKDK	16	31106107	31112791	1	branched chain keto acid dehydrogenase kinase [Source:HGNC Symbol;Acc:HGNC:16902]
ENSG00000103512	0.283743	7.95925	0.40628	0.998855	NOMO1	16	14833721	14896157	1	NODAL modulator 1 [Source:HGNC Symbol;Acc:HGNC:30060]
ENSG00000103549	-0.317792	7.02425	0.3052	0.998855	RNF40	16	30761745	30776307	1	ring finger protein 40 [Source:HGNC Symbol;Acc:HGNC:16867]
ENSG00000103653	-0.0409116	7.3419	0.911739	0.998855	CSK	15	74782057	74803198	1	C-terminal Src kinase [Source:HGNC Symbol;Acc:HGNC:2444]
ENSG00000103769	0.680443	6.73667	0.149733	0.998855	RAB11A	15	65726054	65891989	1	RAB11A, member RAS oncogene family [Source:HGNC Symbol;Acc:HGNC:9760]
ENSG00000103855	-0.0866306	7.26076	0.797616	0.998855	CD276	15	73683966	73714514	1	CD276 molecule [Source:HGNC Symbol;Acc:HGNC:19137]
ENSG00000103966	0.00401668	7.29265	0.99038	0.998855	EHD4	15	41895933	41972557	-1	EH domain containing 4 [Source:HGNC Symbol;Acc:HGNC:3245]
ENSG00000104067	0.276498	6.7351	0.73561	0.998855	TJP1	15	29699367	29968915	-1	tight junction protein 1 [Source:HGNC Symbol;Acc:HGNC:11827]
ENSG00000104341	0.469942	8.66493	0.162253	0.998855	LAPTM4B	8	97775057	97853013	1	lysosomal protein transmembrane 4 beta [Source:HGNC Symbol;Acc:HGNC:13646]
ENSG00000104408	0.352171	8.63505	0.474666	0.998855	EIF3E	8	108162787	108443496	-1	eukaryotic translation initiation factor 3 subunit E [Source:HGNC Symbol;Acc:HGNC:3277]
ENSG00000104413	-0.947441	7.43369	0.167119	0.998855	ESRP1	8	94641074	94707466	1	epithelial splicing regulatory protein 1 [Source:HGNC Symbol;Acc:HGNC:25966]
ENSG00000104517	0.226642	6.81791	0.786061	0.998855	UBR5	8	102252273	102412759	-1	ubiquitin protein ligase E3 component n-recognin 5 [Source:HGNC Symbol;Acc:HGNC:16806]
ENSG00000104518	-0.394111	7.22642	0.25802	0.998855	GSDMD	8	143553207	143563062	1	gasdermin D [Source:HGNC Symbol;Acc:HGNC:25697]
ENSG00000104522	0.307464	7.89837	0.418359	0.998855	GFUS	8	143612618	143618048	-1	GDP-L-fucose synthase [Source:HGNC Symbol;Acc:HGNC:12390]
ENSG00000104529	0.0173618	7.64227	0.954128	0.998855	EEF1D	8	143579697	143599541	-1	eukaryotic translation elongation factor 1 delta [Source:HGNC Symbol;Acc:HGNC:3211]
ENSG00000104635	-0.285573	7.45267	0.667657	0.998855	SLC39A14	8	22367278	22434129	1	solute carrier family 39 member 14 [Source:HGNC Symbol;Acc:HGNC:20858]
ENSG00000104687	0.25289	7.62572	0.509409	0.998855	GSR	8	30678066	30727846	-1	glutathione-disulfide reductase [Source:HGNC Symbol;Acc:HGNC:4623]
ENSG00000104738	0.209842	7.04831	0.684305	0.998855	MCM4	8	47960185	47978160	1	minichromosome maintenance complex component 4 [Source:HGNC Symbol;Acc:HGNC:6947]
ENSG00000104774	0.0244381	6.70841	0.955197	0.998855	MAN2B1	19	12646511	12666742	-1	mannosidase alpha class 2B member 1 [Source:HGNC Symbol;Acc:HGNC:6826]
ENSG00000104783	0.228724	7.95153	0.5329	0.998855	KCNN4	19	43766533	43781257	-1	potassium calcium-activated channel subfamily N member 4 [Source:HGNC Symbol;Acc:HGNC:6293]
ENSG00000104805	-0.569034	7.62724	0.0933244	0.998855	NUCB1	19	48900312	48923372	1	nucleobindin 1 [Source:HGNC Symbol;Acc:HGNC:8043]
ENSG00000104812	-0.249405	7.38721	0.565855	0.998855	GYS1	19	48968130	48993310	-1	glycogen synthase 1 [Source:HGNC Symbol;Acc:HGNC:4706]
ENSG00000104824	-0.245844	8.34903	0.419963	0.998855	HNRNPL	19	38836388	38852347	-1	heterogeneous nuclear ribonucleoprotein L [Source:HGNC Symbol;Acc:HGNC:5045]
ENSG00000104825	0.063471	6.79199	0.873302	0.998855	NFKBIB	19	38899700	38908893	1	NFKB inhibitor beta [Source:HGNC Symbol;Acc:HGNC:7798]
ENSG00000104833	0.153119	7.04631	0.817758	0.998855	TUBB4A	19	6494319	6502848	-1	tubulin beta 4A class IVa [Source:HGNC Symbol;Acc:HGNC:20774]
ENSG00000104852	0.129734	9.0005	0.715346	0.998855	SNRNP70	19	49085419	49108605	1	small nuclear ribonucleoprotein U1 subunit 70 [Source:HGNC Symbol;Acc:HGNC:11150]
ENSG00000104853	-0.0204941	7.90093	0.958951	0.998855	CLPTM1	19	44954585	44993341	1	CLPTM1 regulator of GABA type A receptor forward trafficking [Source:HGNC Symbol;Acc:HGNC:2087]
ENSG00000104859	0.310084	7.31971	0.421622	0.998855	CLASRP	19	45039045	45070956	1	CLK4 associating serine/arginine rich protein [Source:HGNC Symbol;Acc:HGNC:17731]
ENSG00000104866	-0.165917	6.74997	0.680917	0.998855	PPP1R37	19	45091396	45148077	1	protein phosphatase 1 regulatory subunit 37 [Source:HGNC Symbol;Acc:HGNC:27607]
ENSG00000104872	-0.42001	6.93049	0.222359	0.998855	PIH1D1	19	49446298	49453497	-1	PIH1 domain containing 1 [Source:HGNC Symbol;Acc:HGNC:26075]
ENSG00000104881	-0.20236	7.82552	0.590743	0.998855	PPP1R13L	19	45379638	45406349	-1	protein phosphatase 1 regulatory subunit 13 like [Source:HGNC Symbol;Acc:HGNC:18838]
ENSG00000104884	-0.151042	7.69781	0.685241	0.998855	ERCC2	19	45349837	45370918	-1	ERCC excision repair 2, TFIIH core complex helicase subunit [Source:HGNC Symbol;Acc:HGNC:3434]
ENSG00000104885	0.202484	7.23957	0.507211	0.998855	DOT1L	19	2163933	2232578	1	DOT1 like histone lysine methyltransferase [Source:HGNC Symbol;Acc:HGNC:24948]
ENSG00000104897	-0.214842	9.10239	0.755338	0.998855	SF3A2	19	2236824	2248655	1	splicing factor 3a subunit 2 [Source:HGNC Symbol;Acc:HGNC:10766]
ENSG00000104904	0.00262714	9.03567	0.994793	0.998855	OAZ1	19	2269509	2273490	1	ornithine decarboxylase antizyme 1 [Source:HGNC Symbol;Acc:HGNC:8095]
ENSG00000104907	0.378026	7.82703	0.243959	0.998855	TRMT1	19	13104902	13117567	-1	tRNA methyltransferase 1 [Source:HGNC Symbol;Acc:HGNC:25980]
ENSG00000104915	-0.189385	7.55936	0.53457	0.998855	STX10	19	13144058	13150383	-1	syntaxin 10 [Source:HGNC Symbol;Acc:HGNC:11428]
ENSG00000104960	-0.0214514	7.21815	0.966438	0.998855	PTOV1	19	49850735	49860744	1	PTOV1 extended AT-hook containing adaptor protein [Source:HGNC Symbol;Acc:HGNC:9632]
ENSG00000104964	-0.513801	8.40084	0.0914346	0.998855	TLE5	19	3052910	3063107	-1	TLE family member 5, transcriptional modulator [Source:HGNC Symbol;Acc:HGNC:307]
ENSG00000104969	-0.116802	8.70947	0.778096	0.998855	SGTA	19	2754715	2783362	-1	small glutamine rich tetratricopeptide repeat containing alpha [Source:HGNC Symbol;Acc:HGNC:10819]
ENSG00000104973	-0.0128296	7.20018	0.978305	0.998855	MED25	19	49818282	49840383	1	mediator complex subunit 25 [Source:HGNC Symbol;Acc:HGNC:28845]
ENSG00000104976	-0.335809	7.13832	0.540315	0.998855	SNAPC2	19	7920338	7923250	1	small nuclear RNA activating complex polypeptide 2 [Source:HGNC Symbol;Acc:HGNC:11135]
ENSG00000104979	-0.00220607	7.26909	0.994981	0.998855	C19orf53	19	13774456	13778773	1	chromosome 19 open reading frame 53 [Source:HGNC Symbol;Acc:HGNC:24991]
ENSG00000104980	-0.00980092	7.38449	0.978764	0.998855	TIMM44	19	7926718	7943667	-1	translocase of inner mitochondrial membrane 44 [Source:HGNC Symbol;Acc:HGNC:17316]
ENSG00000105063	-0.158762	8.53355	0.6331	0.998855	PPP6R1	19	55229779	55259017	-1	protein phosphatase 6 regulatory subunit 1 [Source:HGNC Symbol;Acc:HGNC:29195]
ENSG00000105088	-0.176042	6.91877	0.623786	0.998855	OLFM2	19	9853718	9936552	-1	olfactomedin 2 [Source:HGNC Symbol;Acc:HGNC:17189]
ENSG00000105135	-0.565986	7.23751	0.190627	0.998855	ILVBL	19	15114984	15125786	-1	ilvB acetolactate synthase like [Source:HGNC Symbol;Acc:HGNC:6041]
ENSG00000105193	-0.630007	11.0154	0.0544869	0.998855	RPS16	19	39433137	39435949	-1	ribosomal protein S16 [Source:HGNC Symbol;Acc:HGNC:10396]
ENSG00000105197	-0.119295	7.68276	0.761663	0.998855	TIMM50	19	39480412	39493785	1	translocase of inner mitochondrial membrane 50 [Source:HGNC Symbol;Acc:HGNC:23656]
ENSG00000105202	-0.445865	8.76935	0.194078	0.998855	FBL	19	39834458	39846379	-1	fibrillarin [Source:HGNC Symbol;Acc:HGNC:3599]
ENSG00000105220	-0.670845	9.87871	0.297038	0.998855	GPI	19	34359480	34402413	1	glucose-6-phosphate isomerase [Source:HGNC Symbol;Acc:HGNC:4458]
ENSG00000105221	-0.137812	7.76379	0.653033	0.998855	AKT2	19	40230317	40285536	-1	AKT serine/threonine kinase 2 [Source:HGNC Symbol;Acc:HGNC:392]
ENSG00000105223	-0.500899	9.1709	0.200152	0.998855	PLD3	19	40348456	40380439	1	phospholipase D family member 3 [Source:HGNC Symbol;Acc:HGNC:17158]
ENSG00000105245	0.198439	6.78722	0.568398	0.998855	NUMBL	19	40665905	40690972	-1	NUMB like endocytic adaptor protein [Source:HGNC Symbol;Acc:HGNC:8061]
ENSG00000105254	-0.0556738	7.02478	0.882788	0.998855	TBCB	19	36114289	36125947	1	tubulin folding cofactor B [Source:HGNC Symbol;Acc:HGNC:1989]
ENSG00000105281	-0.716679	9.13865	0.127907	0.998855	SLC1A5	19	46774883	46788594	-1	solute carrier family 1 member 5 [Source:HGNC Symbol;Acc:HGNC:10943]
ENSG00000105287	0.157341	7.21942	0.634491	0.998855	PRKD2	19	46674275	46717127	-1	protein kinase D2 [Source:HGNC Symbol;Acc:HGNC:17293]
ENSG00000105289	-0.517238	7.66513	0.121474	0.998855	TJP3	19	3708362	3750813	1	tight junction protein 3 [Source:HGNC Symbol;Acc:HGNC:11829]
ENSG00000105290	-0.0969615	7.06167	0.832844	0.998855	APLP1	19	35867899	35879792	1	amyloid beta precursor like protein 1 [Source:HGNC Symbol;Acc:HGNC:597]
ENSG00000105323	-0.452145	8.49279	0.117713	0.998855	HNRNPUL1	19	41262496	41307787	1	heterogeneous nuclear ribonucleoprotein U like 1 [Source:HGNC Symbol;Acc:HGNC:17011]
[truncated: 1,770 more rows]

## Sheet: Wt_APR_vs_DMSO
ensembl_gene_id	logFC	logCPM	PValue	FDR	external_gene_name	chromosome_name	start_position	end_position	strand	description
[truncated: 2,419 more rows]

[truncated: 1 more sheets: Wt_RT_vs_DMSO]
